# Supplementary material for: The oral microbiome of early stage Parkinson’s disease and its relationship with functional measures of motor and non-motor function
Source: PLoS One. 2019 Jun 27;14(6):e0218252. doi: 10.1371/journal.pone.0218252 (PMC6597068; doi:10.1371/journal.pone.0218252)
Supplement: S1 Table — (XLSX) [file pone.0218252.s004.xlsx]

## Sheet: Sheet1
Subject	C1001	C1004	C1005	C1006	C1007	C1009	C1010	C1011	C1013	C1014	C1015	C1016	C1017	C1021	C1022	C1023	C1024	C1025	C1026	C1027	C1028	C1030	C1032	C1035	C1036	C1037	C1038	C1039	C1048	C1049	C1050	C1051	C1052	C1053	C1054	C1055	P1001	P1002	P1003	P1005	P1006	P1007	P1009	P1011	P1016	P1017	P1021	P1022	P1023
Class	C	C	C	C	C	C	C	C	C	C	C	C	C	C	C	C	C	C	C	C	C	C	C	C	C	C	C	C	C	C	C	C	C	C	C	C	PD	PD	PD	PD	PD	PD	PD	PD	PD	PD	PD	PD	PD
1639348: Magnetospirillum sp. ME-1	1	0	0	0	1	0	0	3	0	2	0	3	0	0	1	0	0	0	1	0	0	0	1	0	1	2	3	0	0	0	1	1	0	0	0	0	2	2	0	0	0	0	0	2	0	0	0	0	2
1837283: Streptomyces sp. S8	0	0	0	0	10	0	0	1	0	1	1	0	0	1	1	0	0	0	0	0	0	0	0	0	0	0	0	0	0	0	0	0	0	0	0	0	0	1	3	0	0	0	0	0	0	0	0	1	3
1909395: Nonomuraea sp. ATCC 55076	1	1	0	7	15	0	2	6	6	1	12	4	1	1	1	6	1	0	0	2	0	0	4	5	3	28	1	0	0	1	0	0	1	0	0	1	2	2	1	3	0	1	0	3	3	1	1	2	6
1972192: Actinomyces gaoshouyii	400	63	180	1061	2549	14	165	635	649	328	626	946	292	228	163	163	446	131	416	75	114	24	211	771	244	396	311	143	42	63	119	185	147	101	26	59	262	427	120	283	52	73	121	406	92	202	50	331	652
1980001: Cellulosimicrobium sp. TH-20	1	11	25	48	84	3	15	145	42	22	23	77	69	10	21	28	20	54	88	18	18	0	50	60	30	134	25	26	16	17	20	35	10	32	11	9	111	46	33	9	24	10	87	81	14	66	147	74	48
1511: Acetoanaerobium sticklandii	1	2	9	35	9	129	14	1	16	2	12	16	8	2	10	0	0	1	11	0	4	0	4	2	7	10	8	1	6	1	1	5	0	2	0	1	5	17	1	2	0	9	4	0	2	0	0	4	14
1076596: Acetobacter persici	0	0	0	0	0	0	0	0	0	0	0	0	0	0	0	0	0	0	0	0	0	0	3	0	0	0	0	0	0	0	0	0	0	0	0	0	0	1	0	0	0	0	0	0	0	0	0	0	2
433: Acetobacteraceae	6	26	1533	4	23	3	1	9	359	8	11	12	3	1177	1	1	1	6	7	2	1	0	6	1	3	1	24	769	2	1	0	2	1	4	1	0	104	2	11	9	2	18	1	13	1348	0	1	20	2
931626: Acetobacterium woodii DSM 1030	9	0	2	50	29	10	13	7	16	0	7	22	19	7	20	1	26	17	10	1	0	0	13	14	45	15	31	4	9	0	4	3	14	4	10	6	104	171	5	8	1	5	237	30	0	11	2	11	25
574087: Acetohalobium arabaticum DSM 5501	0	3	2	0	5	0	1	0	0	1	0	1	13	2	0	1	0	0	0	1	1	0	0	5	1	1	0	1	2	1	1	0	0	8	0	0	1	2	0	0	0	0	2	0	2	0	0	5	0
891968: Acetomicrobium mobile DSM 13181	0	1	0	0	2	1	0	0	2	0	1	1	1	0	0	1	0	0	1	1	0	0	0	0	1	4	1	2	0	0	1	0	0	0	0	0	0	5	0	0	0	0	0	0	0	5	0	1	0
2147: Acholeplasma	1	2	1	3	8	0	1	4	2	1	0	0	4	3	6	1	0	0	1	0	0	0	1	1	3	1	1	0	0	0	0	0	1	0	0	0	1	2	0	1	4	2	0	0	1	0	0	1	9
61635: Acholeplasma brassicae	1	7	6	77	161	0	16	27	135	21	44	27	19	22	4	21	5	33	13	3	8	15	20	16	11	3	23	23	2	2	0	10	0	12	16	9	65	12	1	5	6	0	12	27	16	0	7	39	7
441768: Acholeplasma laidlawii PG-8A	0	1	2	8	20	0	6	2	4	1	13	12	34	0	3	7	0	3	0	0	2	2	2	4	1	0	0	1	0	3	0	0	0	0	0	1	6	6	2	0	0	0	0	3	0	0	0	1	7
35623: Acholeplasma oculi	2	2	0	9	4	1	1	2	1	1	2	0	1	1	14	5	0	3	1	0	0	0	1	3	0	4	1	1	0	1	0	24	1	3	0	0	2	1	8	0	0	0	1	14	0	0	1	1	12
1318466: Acholeplasma palmae J233	3	18	19	75	392	1	10	89	109	39	161	215	41	34	49	121	12	22	39	5	5	1	45	26	31	16	70	91	7	2	4	9	0	21	1	6	72	13	1	0	9	0	46	104	12	0	12	133	63
222: Achromobacter	0	1	0	0	1	1	2	5	0	0	4	0	0	0	0	5	0	0	0	1	0	0	4	1	1	0	0	0	0	0	1	0	0	0	0	2	0	1	0	0	0	0	1	2	0	0	1	1	1
1881016: Achromobacter sp. MFA1 R4	0	0	0	0	0	0	0	4	0	0	1	1	2	0	1	13	0	0	24	2	0	0	9	9	2	1	0	2	0	1	1	0	0	0	0	0	24	4	0	0	0	0	1	1	8	0	0	0	1
85698: Achromobacter xylosoxidans	0	0	1	0	0	0	1	0	2	1	1	0	0	1	0	2	0	0	0	0	0	0	2	1	0	0	0	0	0	0	0	0	0	0	0	0	1	1	0	0	1	0	2	0	0	0	0	1	0
762376: Achromobacter xylosoxidans A8	1	4	0	0	0	0	0	2	1	2	0	0	1	1	0	1	0	0	0	0	16	0	0	0	40	0	1	0	0	0	1	0	0	0	0	1	1	1	0	0	0	0	2	0	6	0	0	0	0
904: Acidaminococcus	2	0	0	1	1	0	7	0	3	4	0	2	2	0	1	6	7	4	0	0	0	1	3	0	2	0	0	1	0	1	0	1	190	2	1	0	2	6	92	0	0	0	1	2	0	1	0	3	4
591001: Acidaminococcus fermentans DSM 20731	2	3	11	24	8	0	10	2	7	0	5	7	4	2	2	0	8	6	12	0	4	1	3	7	13	67	1	5	3	6	1	11	78	0	1	0	32	18	26	2	1	5	0	5	0	2	0	4	7
568816: Acidaminococcus intestini RyC-MR95	0	1	0	1	5	0	5	3	0	0	9	0	4	2	73	18	0	2	14	2	0	0	0	1	3	2	1	1	0	0	0	0	5	0	0	0	0	6	1	7	0	0	0	1	0	2	2	6	7
1765967: Acidihalobacter ferrooxidans	0	1	4	3	73	0	0	8	52	2	0	8	8	0	4	54	0	2	3	0	3	0	3	5	1	0	2	4	0	1	0	0	2	6	1	0	33	27	0	8	0	0	1	0	66	0	4	1	1
160660: Acidihalobacter prosperus	0	1	2	1	17	0	3	7	6	0	0	1	0	0	2	8	0	2	0	1	0	0	2	0	1	2	2	4	0	0	0	0	0	1	0	0	2	18	0	1	0	1	0	0	5	1	2	2	0
926570: Acidiphilium multivorum AIU301	0	0	0	0	0	0	0	0	0	0	0	0	0	0	0	0	0	0	0	0	0	0	0	0	0	0	0	0	0	0	0	0	0	0	0	0	0	1	0	0	0	0	0	2	0	0	0	0	0
1748: Acidipropionibacterium acidipropionici	11	15	12	9	86	2	40	34	43	378	44	39	95	47	6	19	4	13	22	4	3	1	26	26	15	20	17	18	2	4	0	9	5	2	4	1	58	21	13	10	8	1	4	25	8	13	4	22	343
119977: Acidithiobacillus	0	1	0	0	1	0	0	0	0	0	0	1	0	0	0	0	0	0	0	1	0	0	0	0	0	0	0	0	0	0	0	0	0	0	0	0	0	1	0	0	0	0	0	0	0	0	0	0	0
637389: Acidithiobacillus caldus ATCC 51756	23	1	11	51	40	0	8	24	18	12	13	40	13	1	3	4	0	0	7	7	15	0	11	92	20	1	16	60	4	14	2	1	8	16	3	19	4	36	0	61	0	3	0	45	1	5	1	1	47
12916: Acidovorax	0	0	0	1	2	2	1	20	1	1	6	0	0	0	0	1	0	6	0	0	0	0	0	2	5	5	2	0	2	0	1	0	1	1	1	0	3	1	0	0	1	0	1	8	1	0	3	4	7
358220: Acidovorax sp. KKS102	0	0	1	1	2	1	1	6	5	6	0	1	0	4	0	11	0	2	1	11	0	0	1	1	6	1	10	1	0	0	1	0	0	2	0	2	0	1	0	1	1	0	4	1	15	1	8	7	3
1842533: Acidovorax sp. RAC01	1	3	0	7	3	6	10	13	5	13	1	0	0	0	1	4	1	2	0	7	3	1	6	1	0	2	5	4	3	1	0	0	0	3	3	4	2	2	2	0	0	0	3	5	7	0	3	7	1
469: Acinetobacter	155	57	59	1192	202	20	662	718	573	93	509	1716	2780	116	216	194	11	550	279	212	347	43	739	269	4825	147	332	293	1356	78	80	284	1360	950	116	136	2256	3178	153	431	19	12	221	430	70	129	51	78	1923
470: Acinetobacter baumannii	0	1	1	8	0	0	2	8	1	0	1	10	12	1	2	3	1	0	2	3	0	0	4	5	14	2	1	0	7	1	1	0	7	3	1	0	5	12	4	1	0	1	2	4	8	1	0	4	5
909768: Acinetobacter calcoaceticus/baumannii complex	0	5	0	0	1	0	0	1	0	1	0	0	1	1	0	5	0	4	2	0	1	1	2	0	0	0	0	1	0	2	1	0	0	0	1	4	5	1	1	1	4	0	4	1	1	2	0	2	2
1046625: Acinetobacter lwoffii WJ10621	0	2	0	0	1	0	3	4	9	2	1	1	0	10	4	4	0	0	0	4	4	0	0	1	0	0	1	3	0	0	1	0	0	0	3	0	2	2	0	0	1	0	0	0	1	2	0	5	3
1608473: Acinetobacter sp. NCu2D-2	0	6	0	0	0	0	0	1	1	0	0	1	0	3	0	1	0	4	0	4	0	0	0	0	2	0	0	0	3	5	1	2	3	16	6	3	0	10	0	0	0	0	2	1	0	0	0	0	0
1197884: Acinetobacter venetianus VE-C3	0	0	0	1	0	0	0	0	0	2	1	2	0	1	0	0	0	0	0	0	0	0	1	0	0	1	0	1	0	0	0	0	0	0	0	0	11	23	0	0	0	0	4	0	0	0	0	0	0
65496: Actinoalloteichus	2	0	1	0	7	0	9	4	27	1	2	3	0	16	0	14	0	6	2	30	0	0	2	5	0	10	9	0	0	0	0	0	0	0	0	0	0	2	3	2	0	0	3	0	6	1	3	5	7
1612551: Actinoalloteichus sp. GBA129-24	10	8	11	51	103	0	0	11	76	99	13	23	8	4	6	35	0	5	3	58	18	1	3	45	20	6	301	4	0	2	0	3	16	5	0	0	19	15	0	2	0	7	0	17	41	4	7	24	44
339671: Actinobacillus succinogenes 130Z	7	16	15	4	15	1	8	102	14	28	39	58	27	35	28	65	0	8	6	61	22	4	34	7	25	26	14	16	7	1	1	0	1	22	6	10	43	2	0	0	23	0	9	17	34	11	15	49	44
1760: Actinobacteria	11036	1440	2787	13119	29591	765	5276	7908	9713	5980	10980	17762	11932	3949	5613	5962	1899	3504	58817	1814	5516	1753	10759	16688	8621	5548	4941	12776	4354	17122	13576	4480	16868	9169	3250	4456	14064	21670	10674	4912	711	2104	6062	6561	2506	8133	3627	4081	32918
201174: Actinobacteria	12	11	8	34	47	1	56	18	16	11	29	76	89	21	13	73	8	8	292	7	1	3	103	39	38	17	11	13	6	18	6	129	10	9	15	13	62	51	22	21	2	3	74	26	9	6	15	8	10
1654: Actinomyces	4588	631	3689	8510	19592	244	8138	6468	3184	4279	15255	8405	5794	990	1386	1574	251	484	7256	588	1932	246	1495	11780	4002	1220	2640	7973	3273	1410	13955	3193	5177	850	988	3086	4777	13585	4767	874	1162	422	157	4630	1222	1807	209	1631	18161
178339: Actinomyces hongkongensis	1251	97	1088	2258	12873	102	1709	3966	2665	1345	2441	3656	1400	1552	969	370	31	545	1693	413	673	134	641	3109	1120	395	943	1478	446	417	1500	512	859	667	396	347	1349	2421	449	4719	104	181	138	2063	345	310	228	604	5966
52773: Actinomyces meyeri	4846	441	3122	9512	65700	162	8835	5645	8880	6719	10705	20900	11553	2147	4505	3099	46	1436	9134	1527	5754	448	3033	16981	4530	1437	5636	6087	1061	1503	4067	3082	4388	1428	651	635	4123	8084	2484	6720	766	929	831	17274	922	1933	552	2615	42343
544580: Actinomyces oris	910	1465	1003	1802	24332	608	4300	20002	4727	3285	5522	24353	5825	2901	1932	4450	1568	2793	55622	1262	1318	325	3400	8725	3350	17158	4481	660	346	26908	721	1738	260	924	1233	1248	4094	11268	2238	1575	1411	678	41184	2663	1738	7720	4235	18505	1837
111015: Actinomyces radicidentis	388	69	258	695	3094	18	577	886	2645	381	678	1095	509	429	352	279	433	261	533	77	75	15	290	946	225	940	243	372	80	38	53	79	171	140	23	26	259	1043	224	790	62	57	60	486	158	345	324	553	1604
1852377: Actinomyces sp. Marseille-P2985	6790	292	1264	4023	16682	112	4097	3172	5348	9280	5833	6117	1484	1218	4756	351	23	1719	7690	2003	4693	1476	2208	4095	5181	426	4923	1498	648	2135	2081	875	2981	6991	3053	596	16882	3047	918	2559	160	2714	794	9555	184	766	2647	1720	11764
1912795: Actinomyces sp. VUL4_3	93	17	34	1069	1657	5	257	143	1364	78	300	907	2903	394	305	113	7	75	116	37	10	14	48	383	91	270	106	72	34	97	28	73	84	82	23	49	88	169	143	376	3	54	28	62	115	171	40	43	216
712122: Actinomyces sp. oral taxon 414	318	133	2531	536	2821	48	225	4552	3425	243	502	1217	470	650	1169	473	2074	274	3149	113	214	42	660	5639	596	2459	382	568	516	102	68	275	190	279	44	99	533	1026	255	699	98	150	464	680	327	429	362	434	961
2049: Actinomycetaceae	12	1	32	159	956	2	29	29	525	152	37	95	122	85	116	53	2	36	312	13	8	15	422	24	90	108	12	12	9	7	21	32	29	10	26	13	33	381	78	122	2	7	12	1	4	65	2	97	393
1865: Actinoplanes	0	2	0	1	1	0	0	0	1	1	2	2	0	0	0	0	0	0	0	0	2	0	1	3	0	0	0	0	0	0	0	0	0	0	0	0	2	1	1	0	0	1	0	0	1	0	0	3	8
1246995: Actinoplanes friuliensis DSM 7358	0	2	0	3	3	0	1	2	0	4	2	5	1	0	0	1	0	2	7	0	0	0	2	6	1	0	0	1	0	0	0	0	0	0	0	0	0	1	0	1	0	0	0	2	0	0	0	0	15
649831: Actinoplanes sp. N902-109	2	0	0	2	8	0	3	0	4	0	3	0	2	0	2	1	2	1	8	1	0	0	2	5	0	1	0	0	0	1	0	1	0	0	0	0	0	2	3	0	0	0	2	5	0	0	0	1	6
446462: Actinosynnema mirum DSM 43827	1	0	0	0	6	1	0	2	1	2	4	1	1	1	1	0	0	0	0	1	0	0	0	2	0	0	1	2	0	0	0	0	1	0	0	0	0	1	0	0	0	0	0	2	0	0	0	2	2
59505: Actinotignum schaalii	13	2	12	62	122	0	173	37	44	23	35	156	16	136	34	20	2	59	80	8	7	1	853	84	32	57	25	21	10	18	45	26	16	13	4	10	29	45	29	60	0	12	6	138	4	20	4	8	102
1247726: Advenella mimigardefordensis DPN7	0	6	0	0	0	0	0	2	0	0	2	0	0	0	0	20	0	1	0	0	0	0	1	0	0	0	0	1	0	2	0	0	0	0	0	0	0	9	0	1	0	0	0	0	1	0	0	0	0
746697: Aequorivita sublithincola DSM 14238	0	0	0	0	6	0	11	24	4	0	8	11	1	4	2	3	0	2	3	0	0	0	3	2	1	0	19	0	0	0	0	0	0	0	0	0	2	5	0	3	0	0	2	1	0	0	0	0	5
1375: Aerococcus	3	5	13	18	343	2	25	37	40	33	36	57	3	71	42	15	0	26	4	10	7	3	38	13	65	14	20	6	5	3	6	4	0	3	4	23	40	50	4	0	1	4	21	17	6	3	3	80	109
119206: Aerococcus sanguinicola	0	9	3	6	49	1	8	17	8	7	19	12	1	3	8	6	0	2	0	10	0	0	2	6	22	9	5	6	1	0	1	0	1	1	0	0	9	5	0	0	1	0	1	3	1	1	3	14	7
1376: Aerococcus urinae	6	13	1	6	56	0	38	43	25	10	14	144	5	280	5	5	2	65	1	14	19	6	14	14	46	81	47	2	4	5	21	0	4	7	3	0	9	6	1	3	1	0	1	178	34	0	1	74	151
866775: Aerococcus urinae ACS-120-V-Col10a	1	4	13	13	64	0	1	8	5	6	71	10	5	9	11	1	0	0	5	9	1	2	6	4	3	12	1	11	0	0	2	0	2	4	0	2	19	7	0	2	0	0	0	4	0	0	5	14	4
51665: Aerococcus urinaeequi	2	5	6	1	8	0	7	7	12	13	17	9	8	6	10	19	0	7	4	12	5	1	5	10	2	1	11	5	4	5	2	0	8	5	2	1	13	5	5	1	0	0	0	13	2	1	3	12	13
128944: Aerococcus urinaehominis	6	62	6	13	117	0	28	53	60	38	57	44	25	15	20	26	14	11	20	5	0	1	19	14	3	10	44	27	0	2	3	8	0	5	3	1	69	4	1	4	1	1	9	9	8	26	16	129	11
1736691: Aeromicrobium choanae	5	4	17	52	17	0	6	7	16	1	24	81	56	21	23	144	2	10	84	2	2	0	152	29	26	16	10	18	14	0	6	45	7	14	9	15	73	26	0	15	0	1	29	30	14	0	7	12	40
2041: Aeromicrobium erythreum	100	2	5	47	161	1	17	30	31	64	63	83	34	6	14	12	2	10	5	145	37	0	12	37	100	23	10	21	13	1	44	1	169	22	32	0	29	44	20	14	1	0	1	86	2	24	15	95	59
585531: Aeromicrobium marinum DSM 15272	1	0	2	0	12	0	0	0	1	0	0	5	1	1	0	0	0	0	0	0	0	2	0	2	1	0	0	0	0	0	0	0	1	1	1	0	1	2	0	3	0	0	0	2	1	0	0	1	7
642: Aeromonas	5	6	2	0	11	2	3	51	1	9	8	17	7	21	3	28	5	49	6	22	0	0	7	2	1	7	5	9	6	4	2	3	3	8	7	7	17	8	1	2	0	0	4	2	10	95	4	5	4
652: Aeromonas schubertii	0	3	0	0	2	0	5	13	2	2	12	4	19	1	3	101	0	0	129	14	2	0	27	5	4	0	0	4	1	1	1	0	0	3	1	0	46	15	0	0	0	0	6	11	1	10	0	0	0
654: Aeromonas veronii	0	0	1	1	6	0	1	26	0	0	0	1	0	0	0	14	0	0	2	0	0	0	20	0	0	0	2	0	2	0	0	0	0	1	0	0	0	2	0	0	0	0	0	4	0	0	0	0	0
416916: Aggregatibacter	9	19	6	11	29	3	4	19	18	41	63	28	21	9	15	58	0	30	10	1	3	0	310	9	45	1	19	104	10	0	0	4	0	9	2	8	76	7	0	0	11	0	16	11	51	1	12	13	4
714: Aggregatibacter actinomycetemcomitans	3	18	8	23	15	0	40	57	22	102	122	97	163	49	24	70	0	33	35	20	25	10	113	29	74	8	36	46	5	2	4	4	3	2	25	13	58	5	0	0	50	0	12	19	78	19	11	46	5
272556: Aggregatibacter actinomycetemcomitans HK1651	4	9	2	0	1	0	5	7	7	64	28	6	4	2	5	9	0	10	6	2	0	0	34	2	9	2	8	2	4	0	0	2	0	1	1	8	11	2	0	0	3	0	2	7	14	0	1	6	0
732: Aggregatibacter aphrophilus	68	645	79	60	39	33	66	209	48	129	370	232	243	36	117	232	0	126	329	23	39	13	1585	445	194	9	67	57	20	13	21	9	4	10	27	55	73	80	2	0	67	14	81	84	193	9	44	173	117
634176: Aggregatibacter aphrophilus NJ8700	22	79	34	263	392	45	306	187	131	114	402	4727	134	263	197	259	0	400	355	14	107	42	660	290	242	48	191	200	77	7	9	37	22	14	92	153	836	184	0	0	28	4	205	136	291	4	130	487	158
1300225: Agrobacterium tumefaciens WRT31	0	0	0	0	0	0	0	0	0	9	0	0	0	0	0	1	0	0	0	0	0	0	0	0	0	0	0	0	0	0	0	0	0	0	0	0	0	2	0	0	0	0	0	0	0	0	0	0	1
311402: Agrobacterium vitis S4	0	2	0	0	0	0	0	1	0	0	0	0	0	0	0	0	0	0	0	0	0	0	0	0	0	1	0	1	0	0	0	0	0	0	0	0	2	1	0	0	0	0	0	0	0	0	0	0	0
453304: Agromyces aureus	60	1	15	115	48	2	19	12	290	26	40	25	38	31	16	2	23	48	25	10	4	2	14	167	31	56	7	7	27	2	0	2	62	2	2	2	64	247	54	424	3	4	2	26	2	21	1	27	153
1679444: Akkermansia glycaniphila	0	6	0	0	2	1	0	0	0	1	1	2	0	2	2	2	0	0	0	0	0	0	0	2	0	0	0	0	1	1	1	0	1	2	0	0	2	1	0	0	0	0	0	0	0	0	2	5	0
349741: Akkermansia muciniphila ATCC BAA-835	0	1	1	0	0	0	1	0	0	0	2	0	0	0	0	0	0	0	1	0	0	0	0	1	0	0	1	0	0	0	0	0	0	0	0	0	0	1	0	0	0	0	0	3	0	0	0	0	1
506: Alcaligenaceae	0	21	1	13	153	2	23	18	35	8	22	23	25	2	3	77	0	41	40	4	11	0	19	7	7	0	3	6	4	1	3	1	1	0	1	1	17	57	0	1	0	0	2	25	11	0	0	16	7
59753: Alcanivorax	0	0	0	0	1	0	0	1	0	1	0	0	1	0	0	2	0	6	0	1	0	0	1	0	0	0	1	0	0	0	0	0	0	0	0	0	0	1	0	0	0	0	0	0	0	0	0	1	0
930169: Alcanivorax dieselolei B5	0	0	0	0	0	0	0	0	1	0	0	1	0	1	0	4	0	0	0	0	0	0	0	0	0	1	0	0	0	0	0	0	0	0	0	0	0	4	0	1	0	0	0	0	0	0	0	0	0
391936: Alcanivorax pacificus W11-5	0	2	0	1	5	0	0	1	0	0	2	1	0	1	1	0	0	2	0	2	0	0	0	0	0	0	0	1	0	0	0	0	0	0	0	0	0	1	0	1	0	0	1	1	1	1	0	12	0
1113728: Alcanivorax sp. NBRC 101098	0	6	0	1	0	0	0	0	0	0	0	0	0	0	0	0	0	0	0	0	0	0	2	0	96	1	0	1	0	0	0	0	0	1	0	0	1	1	0	0	0	0	0	0	47	0	0	0	0
388413: Algoriphagus machipongonensis	1	1	0	1	4	0	0	0	2	2	1	2	1	0	0	0	5	1	1	0	1	2	0	0	1	0	0	1	0	5	1	1	1	1	1	0	9	9	0	1	0	0	0	0	0	0	0	6	1
596154: Alicycliphilus denitrificans K601	0	1	0	0	0	1	1	0	0	1	2	0	7	3	0	1	0	2	1	1	1	1	0	0	1	1	0	0	0	1	0	0	1	0	0	0	0	4	0	0	0	0	1	0	2	0	1	1	1
1388: Alicyclobacillus acidocaldarius subsp. acidocaldarius	0	1	3	4	6	0	2	1	4	0	1	1	1	0	1	0	1	1	0	1	0	0	1	0	1	0	0	2	0	0	0	0	0	0	0	0	0	2	0	0	0	1	3	0	1	0	0	5	6
1048834: Alicyclobacillus acidocaldarius subsp. acidocaldarius Tc-4-1	0	0	0	2	3	0	1	3	1	5	4	0	0	0	4	0	0	0	0	0	0	0	0	1	2	1	1	2	0	0	0	0	2	2	0	0	0	2	1	1	0	0	0	3	0	0	0	3	7
316275: Aliivibrio salmonicida LFI1238	2	0	7	6	2	1	0	0	11	2	5	2	2	2	34	2	0	0	17	9	2	0	1	0	1	60	35	5	6	0	0	0	0	1	0	2	3	2	0	0	0	2	0	0	5	0	1	0	1
679935: Alistipes finegoldii DSM 17242	15	6	2	12	13	0	20	9	8	4	11	24	2	13	8	15	4	4	12	2	6	3	12	8	32	6	13	4	2	15	2	0	0	3	5	3	19	11	0	1	1	0	0	9	12	4	1	12	22
717959: Alistipes shahii WAL 8301	0	2	62	19	130	0	163	2	37	103	8	3	72	3	1	0	7	43	8	2	20	6	8	6	118	4	3	1	7	2	0	3	2	1	5	4	38	14	19	7	0	0	1	8	3	1	1	4	341
187272: Alkalilimnicola ehrlichii MLHE-1	0	1	3	0	0	1	0	1	1	0	0	2	0	0	0	3	0	1	3	1	0	1	3	0	0	2	0	0	0	0	0	0	0	0	0	0	0	9	0	0	0	1	1	0	0	0	1	0	0
114627: Alkaliphilus	0	2	6	3	12	0	1	0	2	0	0	0	0	0	0	2	2	1	0	0	0	0	0	2	2	3	0	0	0	0	0	0	0	3	0	0	1	1	0	1	0	0	0	0	1	0	0	0	1
293826: Alkaliphilus metalliredigens QYMF	5	0	5	24	9	5	6	30	4	4	3	13	5	2	0	3	1	2	3	4	3	0	51	10	5	9	0	4	0	15	3	13	3	1	0	13	6	3	2	6	1	1	1	144	0	1	1	11	23
350688: Alkaliphilus oremlandii OhILAs	4	0	2	10	12	0	5	3	44	1	4	14	4	1	5	1	3	1	1	1	3	1	5	7	4	36	2	6	4	5	0	0	1	4	1	0	3	24	1	13	2	0	1	0	0	0	0	1	2
1653480: Alloactinosynnema sp. L-07	1	0	0	0	3	1	1	1	1	2	1	1	0	1	0	0	0	1	0	0	0	0	1	1	0	1	0	0	0	1	0	0	0	6	0	0	0	1	0	0	0	0	0	2	0	0	0	2	1
572477: Allochromatium vinosum DSM 180	0	0	1	2	24	1	0	10	6	1	0	10	5	5	1	3	0	5	11	1	0	0	17	2	2	2	1	2	0	0	1	0	0	0	1	0	28	14	0	1	0	1	2	11	9	6	8	2	0
211114: Allokutzneria albata	10	21	13	55	13	0	25	6	300	7	25	44	423	51	48	355	18	5	914	0	3	0	132	277	28	43	4	8	180	13	8	311	9	95	72	14	408	83	1	556	23	6	51	64	321	78	4	153	46
28211: Alphaproteobacteria	5	41	21	59	484	72	30	54	140	111	62	88	109	25	56	94	10	134	60	67	52	30	238	63	896	85	132	60	23	17	11	8	23	25	42	5	56	1971	14	28	5	14	66	197	55	67	24	77	96
1267766: Altererythrobacter atlanticus	1	3	1	0	0	1	0	2	0	1	0	0	0	0	0	0	1	0	0	0	0	0	1	0	0	0	0	0	1	1	0	0	0	2	2	0	0	1	1	0	0	0	2	1	0	0	0	1	5
72275: Alteromonadaceae	2	0	1	0	5	0	2	1	0	0	3	2	2	0	2	1	0	0	0	0	0	0	1	0	1	0	0	1	0	0	0	0	0	0	1	0	2	1	0	0	1	0	0	0	0	0	0	2	2
135622: Alteromonadales	24	9	18	138	153	0	22	17	127	4	28	30	9	51	44	4	1	2	19	1	4	0	8	36	8	12	14	69	5	5	9	5	1	22	7	11	37	81	0	3	0	0	3	22	21	8	0	12	109
226: Alteromonas	1	8	32	4	23	2	0	11	83	3	10	11	2	3	0	62	273	22	5	2	1	193	8	32	78	0	4	48	89	4	0	0	0	5	3	2	32	9	0	0	0	3	0	18	27	302	13	6	0
28108: Alteromonas macleodii	0	3	0	1	6	0	0	17	4	0	4	4	7	3	1	4	0	1	6	0	1	0	2	1	0	0	0	0	0	0	0	0	0	0	0	0	1	6	0	0	0	0	0	3	3	0	1	4	2
529120: Alteromonas macleodii ATCC 27126	0	0	0	0	0	0	0	0	0	0	0	1	1	1	0	0	0	0	1	0	0	0	0	0	0	0	0	0	0	0	0	0	0	0	0	0	1	2	0	0	0	0	0	4	1	8	0	1	1
572547: Aminobacterium colombiense DSM 12261	0	0	4	0	3	12	2	0	0	0	3	0	0	1	1	0	0	0	0	0	2	0	0	0	0	1	0	6	0	0	0	0	1	0	0	0	0	1	0	2	0	3	0	0	0	0	0	1	0
584708: Aminomonas paucivorans DSM 12260	2	0	0	0	4	4	21	0	2	0	8	4	14	0	0	2	0	1	0	0	1	0	0	0	4	0	0	0	2	0	0	0	0	2	0	0	1	7	0	0	0	1	0	0	0	0	0	3	1
429009: Ammonifex degensii KC4	0	1	0	0	5	0	0	0	3	0	2	0	0	0	0	1	0	0	0	0	0	0	0	0	0	0	4	0	0	0	0	0	0	1	0	0	1	2	0	0	0	0	0	0	0	0	0	0	0
698758: Amphibacillus xylanus NBRC 15112	4	3	1	16	26	0	2	13	11	3	10	12	8	1	2	5	1	4	14	0	5	0	1	9	3	1	1	0	0	4	0	0	0	2	0	0	9	7	0	1	0	0	4	0	6	3	0	5	4
1813: Amycolatopsis	26	2	0	3	2	0	4	4	7	4	5	3	2	1	0	0	2	0	0	0	0	0	0	1	1	17	0	0	0	0	0	1	0	0	2	0	3	2	0	16	0	1	4	1	3	1	0	13	7
129921: Amycolatopsis keratiniphila	0	0	0	7	11	0	1	1	3	2	7	9	4	4	1	0	5	0	1	1	0	0	1	2	2	1	1	1	1	1	1	3	0	1	3	2	2	11	0	1	0	0	0	3	1	3	0	3	3
33910: Amycolatopsis mediterranei	0	0	2	1	6	0	0	3	2	1	2	4	1	4	1	0	11	1	2	13	1	0	0	1	1	3	1	0	1	4	0	0	2	1	0	0	2	1	0	2	0	2	0	1	0	8	4	4	5
1221524: Amycolatopsis mediterranei RB	2	0	0	0	11	0	0	0	5	0	0	1	3	1	0	1	0	0	0	0	0	0	0	3	0	0	0	0	0	0	0	2	2	0	0	0	0	2	1	1	0	0	0	4	0	0	0	0	0
713604: Amycolatopsis mediterranei S699	2	2	2	5	7	0	1	3	6	0	6	10	8	2	0	0	1	1	1	2	0	0	0	6	1	4	0	0	0	2	0	0	6	0	0	1	1	13	0	21	0	0	0	1	5	3	0	1	14
749927: Amycolatopsis mediterranei U32	0	0	0	0	12	0	0	1	1	2	1	4	0	2	0	0	7	0	1	1	0	0	0	2	1	1	1	0	0	2	0	0	0	1	0	0	0	6	0	0	0	0	2	4	0	0	0	1	57
1068978: Amycolatopsis methanolica 239	1	0	6	1	34	0	0	3	5	2	4	11	4	2	1	1	0	0	1	1	8	0	1	14	1	3	0	2	0	3	2	1	7	2	0	0	5	8	0	6	1	0	0	8	2	0	3	3	11
31958: Amycolatopsis orientalis	1	1	2	0	5	0	2	7	1	6	2	8	2	0	0	0	0	0	0	0	0	0	1	23	0	1	0	0	0	0	0	0	0	0	0	2	0	6	1	0	1	0	0	0	0	4	0	1	4
1163: Anabaena	0	1	1	0	0	1	0	0	0	0	0	1	0	0	0	0	0	0	0	0	0	0	0	0	0	0	0	0	0	0	0	0	0	0	0	0	0	2	0	0	0	0	1	0	0	0	0	0	16
1870984: Anaerococcus mediterraneensis	1	2	12	10	5	1	1	0	13	13	15	13	5	1	20	1	1	3	4	4	4	0	2	2	20	13	7	5	3	0	1	7	2	4	4	2	3	1	1	3	0	0	0	9	3	0	0	3	37
525919: Anaerococcus prevotii DSM 20548	1	1	13	6	6	5	2	1	1	2	1	5	0	1	0	3	1	0	1	1	1	0	3	1	0	14	2	2	0	0	1	0	0	0	0	7	4	1	0	0	0	0	0	2	6	1	0	2	7
1889813: Anaerolineaceae bacterium oral taxon 439	1	5	72	0	1	21	11	0	1	0	1	2	31	0	23	0	0	0	0	0	0	1	0	1	0	0	0	0	0	0	0	0	0	0	2	0	0	28	4	0	0	8	0	0	0	0	0	0	0
161492: Anaeromyxobacter	0	1	0	0	2	0	4	0	5	1	4	2	0	0	0	0	0	0	0	0	0	0	0	0	1	2	0	2	0	0	0	0	0	0	0	0	0	1	0	0	0	0	0	0	0	1	0	0	1
290397: Anaeromyxobacter dehalogenans 2CP-C	0	0	0	0	7	0	2	0	0	2	0	0	0	1	0	0	1	0	0	0	0	0	0	1	0	3	0	1	0	0	0	0	0	0	2	0	1	8	0	0	0	0	1	1	0	0	0	1	2
447217: Anaeromyxobacter sp. K	0	6	0	0	9	1	6	10	0	3	2	4	4	1	0	2	0	0	0	0	1	0	2	2	1	1	0	0	0	0	1	0	0	0	0	0	0	27	0	0	0	1	0	3	0	0	0	2	0
649756: Anaerostipes hadrus	16	32	19	49	231	0	76	76	185	97	127	132	49	51	43	52	3	31	43	7	58	9	58	94	157	15	65	45	23	6	0	3	39	24	16	7	45	144	5	9	11	1	2	27	4	21	10	76	426
1450761: Aneurinibacillus sp. XH2	7	5	6	5	50	0	46	24	8	40	23	21	11	5	124	2	0	2	17	3	14	2	10	1	13	2	11	5	0	4	1	1	7	1	2	2	3	16	1	3	0	0	5	8	1	3	1	44	60
150247: Anoxybacillus	1	1	1	3	1	1	1	10	2	4	1	1	0	3	1	1	3	24	1	3	0	1	0	0	1	1	0	1	1	0	1	0	2	0	0	0	0	1	3	0	1	0	2	1	3	0	2	8	0
491915: Anoxybacillus flavithermus WK1	3	3	0	1	2	0	0	1	2	0	1	0	0	0	5	4	2	20	0	0	0	0	0	0	1	1	0	0	0	0	0	0	0	0	0	0	0	1	1	0	1	0	1	1	0	0	2	9	0
198467: Anoxybacillus gonensis	0	0	0	0	0	0	0	1	2	0	3	0	3	0	0	0	0	45	1	0	0	0	0	0	0	3	0	0	0	0	0	0	0	0	2	0	1	1	0	0	0	0	0	0	7	0	0	1	1
1938604: Aquaspirillum sp. LM1	0	0	0	0	13	0	10	9	4	4	5	35	0	6	1	9	0	5	11	4	2	0	19	3	2	0	6	3	2	19	1	1	0	7	9	2	6	7	0	0	1	0	3	54	4	2	3	8	5
758820: Aquiflexum balticum DSM 16537	0	1	0	0	0	0	0	0	0	0	0	2	0	0	0	3	0	0	1	0	0	0	1	1	1	0	0	0	0	0	0	1	0	0	0	0	1	2	0	0	0	0	5	0	0	1	0	1	1
644284: Arcanobacterium haemolyticum DSM 20595	100	0	26	51	286	2	17	29	376	33	165	117	17	15	35	14	13	23	23	35	12	2	48	119	40	16	23	15	11	18	17	6	40	20	14	9	12	65	56	155	5	10	1	105	6	25	8	16	432
2157: Archaea	0	0	0	0	0	0	0	0	0	1	0	0	0	0	0	0	0	1	0	0	0	0	0	0	0	0	0	0	0	0	0	0	0	0	0	0	0	1	0	0	0	0	0	0	0	0	0	0	0
48: Archangium gephyra	0	1	0	0	6	0	0	0	0	2	2	5	0	0	0	0	0	0	0	0	0	0	0	1	0	0	0	0	0	1	0	0	0	0	0	1	0	23	0	0	0	0	0	1	0	0	0	2	20
28196: Arcobacter	0	5	0	0	4	0	0	2	1	3	0	1	0	1	0	1	0	0	0	2	0	0	1	1	1	0	2	0	8	11	2	1	6	9	10	1	0	3	0	0	0	0	0	0	1	0	0	0	1
28197: Arcobacter butzleri	6	6	1	302	70	1	151	4	19	1	35	3	1	14	6	6	15	2	1015	0	5	1	685	182	6	55	2	9	12	20	3	33	120	5	4	30	49	811	0	25	1	0	1	3	2	2	0	29	0
1036172: Arcobacter butzleri 7h1h	0	0	0	0	0	0	0	0	4	0	0	0	0	0	1	0	0	0	0	0	0	0	7	0	0	0	0	0	1	0	0	0	0	0	0	0	0	1	0	0	0	0	1	0	0	0	0	0	0
367737: Arcobacter butzleri RM4018	0	0	0	1	6	0	1	1	0	2	0	2	0	0	0	0	0	1	2	0	0	0	6	2	0	0	0	0	0	2	0	1	0	0	1	0	1	7	0	1	0	0	0	0	0	0	0	0	0
572480: Arcobacter nitrofigilis DSM 7299	0	2	2	2	0	0	2	0	0	0	0	2	3	0	1	0	0	0	1	1	1	0	1	1	2	0	0	1	0	2	0	2	0	0	2	0	0	2	0	0	1	0	0	2	0	0	0	1	0
944547: Arcobacter sp. L	0	2	0	15	34	1	80	0	0	1	1	0	1	2	3	0	5	0	2	0	0	0	12	15	0	2	0	0	2	3	0	0	9	11	5	1	0	77	0	0	0	1	0	1	0	0	0	0	1
1850254: Arcobacter sp. LPB0137	1	0	0	0	1	0	2	0	0	0	0	0	0	1	0	0	1	0	1	1	0	0	0	0	0	0	1	2	1	1	0	0	0	1	0	1	0	6	0	0	0	0	0	0	0	0	0	0	0
76114: Aromatoleum aromaticum EbN1	0	0	0	0	1	0	0	5	1	6	2	3	0	2	0	18	0	0	1	2	2	0	3	0	1	0	4	0	0	2	1	0	0	0	2	1	2	3	0	0	0	0	0	0	1	0	0	1	0
1658671: Arsenicicoccus sp. oral taxon 190	1	3	1	1	43	1	5	7	5	5	4	13	5	1	3	19	8	3	4	0	0	0	3	10	3	4	0	0	0	2	0	1	1	0	0	0	0	1	0	6	0	1	0	6	4	1	1	10	21
1663: Arthrobacter	61	8	43	129	392	14	151	56	51	72	76	143	164	1338	55	124	22	141	353	65	41	9	6680	243	50	184	109	67	65	104	41	39	182	78	92	66	188	153	35	20	4	15	61	138	49	36	8	16	286
656366: Arthrobacter alpinus	1	0	0	5	8	0	3	1	2	2	5	7	3	4	0	2	1	3	1	3	1	0	0	4	4	7	7	0	3	0	0	1	6	10	0	2	5	1	2	4	0	6	1	3	0	21	4	5	5
1933880: Arthrobacter halophytocola	0	11	0	9	17	4	7	62	14	3	19	94	30	20	15	37	3	7	23	6	3	16	30	18	4	15	52	0	0	36	2	0	5	11	11	3	17	12	2	3	1	15	2	0	8	1	2	35	18
595593: Arthrobacter sp. A3	0	0	1	14	4	0	4	0	4	4	3	5	17	0	0	0	0	0	0	0	0	0	4	6	0	2	1	6	0	0	13	0	8	1	0	0	0	1	0	0	0	0	1	1	1	0	0	0	4
1771959: Arthrobacter sp. ATCC 21022	4	0	9	3	11	0	2	2	3	0	6	14	7	4	1	8	0	1	3	2	1	0	1	4	2	4	4	2	1	0	0	4	3	1	3	5	7	12	0	0	1	1	6	3	1	2	4	7	29
1704044: Arthrobacter sp. ERGS1: 01	20	3	7	15	195	1	26	29	152	30	54	154	33	7	24	13	2	15	23	7	7	3	13	210	23	7	15	7	5	5	5	11	14	3	4	1	9	96	41	262	0	5	1	42	3	77	4	12	370
290399: Arthrobacter sp. FB24	4	2	4	7	34	1	3	12	6	5	6	12	6	8	7	0	0	1	1	2	3	0	4	9	2	5	2	0	5	0	1	0	1	0	4	0	19	5	3	3	0	8	0	5	0	6	2	2	23
1618207: Arthrobacter sp. IHBB 11108	1	0	1	0	7	0	0	1	6	2	3	0	0	0	1	2	0	0	4	0	0	0	3	0	0	3	2	0	0	1	0	1	0	0	2	0	0	1	0	1	0	0	1	4	0	0	0	14	5
1690248: Arthrobacter sp. LS16	12	15	15	48	18	30	10	143	38	38	21	65	7	36	27	63	3	217	72	6	8	162	81	112	72	91	156	78	37	39	22	38	8	187	5	83	34	8	7	8	4	3	10	62	70	14	162	212	46
1494608: Arthrobacter sp. PAMC 25486	2	0	0	1	3	0	1	7	3	2	6	14	0	1	1	0	2	1	2	1	0	0	4	3	1	0	0	0	0	1	2	0	1	1	0	1	0	1	0	0	0	0	7	0	1	3	0	4	6
1357915: Arthrobacter sp. QXT-31	0	0	1	2	10	0	0	6	9	5	18	10	4	6	2	0	1	0	1	1	0	0	2	10	1	7	1	0	0	2	1	1	2	1	0	0	0	3	1	1	1	4	1	5	2	0	0	8	22
1118963: Arthrobacter sp. Rue61a	1	1	0	0	2	1	3	3	2	0	1	10	0	1	0	0	0	0	0	0	0	0	1	1	0	7	1	0	0	3	0	0	1	1	0	0	0	1	0	1	0	7	0	1	0	0	0	0	1
1849032: Arthrobacter sp. U41	3	0	1	2	31	2	8	13	0	2	7	2	2	2	0	0	0	2	3	0	1	1	0	1	1	1	1	0	0	0	0	0	3	0	0	0	0	2	0	3	0	128	0	2	2	0	1	4	5
1652545: Arthrobacter sp. YC-RL1	1	1	3	5	45	1	12	28	8	5	19	31	4	5	5	9	2	9	57	5	2	0	5	17	7	16	18	2	1	7	1	8	4	1	31	2	6	24	2	8	1	2	6	10	4	4	3	12	34
1806905: Arthrobacter sp. ZXY-2	1	0	0	1	13	2	5	5	11	7	2	5	4	1	0	5	2	2	6	3	0	0	1	1	4	16	1	4	0	0	0	0	1	0	1	1	3	8	0	12	2	6	2	4	2	6	3	5	6
459495: Arthrospira platensis C1	0	1	0	0	1	0	1	2	0	0	2	1	0	0	0	1	1	1	0	2	1	0	2	0	1	1	1	0	1	0	3	0	0	3	0	1	2	1	0	0	0	0	1	2	1	2	0	0	1
4890: Ascomycota	3	8	19	13	18	65	30	25	29	44	52	19	6	44	12	41	16	64	6	45	18	9	51	15	55	29	16	28	8	8	3	0	14	17	4	4	10	28	5	5	6	8	58	24	16	18	7	42	55
330879: Aspergillus fumigatus Af293	2	15	4	16	23	74	70	55	81	51	65	23	5	8	5	22	10	22	11	84	24	27	112	12	23	42	39	53	10	3	1	1	35	13	2	0	6	1488	7	3	1	1	41	17	19	68	23	205	162
1643824: Atopobiaceae	7	11	60	80	139	34	101	23	54	113	84	283	33	19	41	11	36	14	10	43	72	15	80	92	104	481	13	23	12	5	12	46	38	14	14	6	75	118	160	121	15	46	3	17	0	119	15	104	435
521095: Atopobium parvulum DSM 20469	403	196	362	3623	989	73	1048	317	479	1794	1043	1562	1117	151	212	126	427	320	152	144	173	85	416	788	524	362	1194	210	110	40	83	769	677	138	171	53	332	1160	1034	727	84	187	2	584	10	454	45	1610	1927
1349819: Aureimonas sp. AU20	10	0	0	128	14	1	30	0	1	2	23	0	0	0	0	0	0	0	175	0	0	0	260	41	0	2	0	2	0	3	0	5	67	0	0	8	0	660	0	0	0	1	3	0	0	0	0	1	0
62928: Azoarcus sp. BH72	0	1	0	0	0	0	0	0	0	0	2	0	0	0	0	0	0	0	0	0	0	0	1	1	1	0	0	0	0	0	1	0	0	0	0	0	0	1	0	0	0	0	0	3	0	0	1	0	0
748247: Azoarcus sp. KH32C	0	0	0	0	2	0	0	2	1	0	0	0	0	0	1	1	0	0	0	0	0	0	0	0	0	0	0	0	1	1	1	0	0	0	0	0	1	2	0	0	1	1	1	0	2	0	0	0	1
192: Azospirillum brasilense	2	3	1	0	1	0	5	0	2	1	0	1	0	2	0	2	0	3	0	2	0	0	2	0	3	0	2	1	2	1	3	0	0	1	0	0	0	3	0	0	0	0	0	0	1	3	0	0	4
1226968: Azospirillum humicireducens	0	0	0	0	0	0	0	0	0	0	0	0	0	0	0	1	0	1	0	0	0	0	0	0	0	0	0	0	0	0	1	0	0	0	0	0	0	1	0	0	0	0	0	0	1	0	0	0	0
352: Azotobacter	0	0	0	0	1	1	0	0	1	0	0	1	0	0	0	0	0	0	0	0	0	0	0	0	0	0	0	0	0	2	0	0	0	0	0	0	3	3	0	0	0	0	0	0	0	0	0	1	0
186817: Bacillaceae	19	38	37	135	204	5	104	429	133	226	91	137	50	31	54	122	26	124	80	15	17	7	29	48	79	48	130	26	8	66	11	10	17	16	3	116	52	89	2	11	39	9	10	68	16	60	33	61	165
1385: Bacillales	1440	1572	720	8169	14788	50	1668	4365	6491	1741	6485	10066	3098	3467	4809	6250	80	2925	3070	1281	1352	269	3988	1931	3206	1432	3157	2460	336	520	333	1891	76	573	407	1755	11380	2019	98	241	783	85	927	3070	1540	122	926	3219	1423
91061: Bacilli	60	446	2764	2168	1756	577	172	5619	753	2756	710	8644	5391	379	1169	1450	3340	392	5291	94	1433	2250	3977	3454	3310	2100	245	11821	186	2552	2207	2897	190	6215	1284	1893	10553	368	705	1335	905	439	1445	3993	151	1567	733	3974	1304
1386: Bacillus	42	746	323	361	1539	3	73	724	242	184	507	414	88	152	751	241	29	185	278	41	39	22	552	142	343	489	177	191	627	10	7	69	67	51	11	106	746	193	26	52	52	70	1995	266	200	24	37	439	528
692420: Bacillus amyloliquefaciens DSM 7	1	1	1	0	8	0	0	0	4	2	2	0	0	2	0	1	0	0	0	0	0	0	1	0	0	0	0	0	0	0	0	0	0	1	0	0	1	1	0	0	0	0	0	1	0	0	0	0	0
1392: Bacillus anthracis	3	12	2	45	82	2	9	10	26	7	8	35	9	3	1	4	4	2	0	3	1	0	1	5	2	6	2	3	0	3	0	3	0	3	0	1	11	8	2	2	0	4	6	8	3	1	0	6	5
1239783: Bacillus atrophaeus UCMB-5137	5	12	6	19	96	0	5	2	36	6	10	13	6	0	2	14	3	0	3	1	1	0	7	4	4	9	11	6	0	4	0	2	0	1	0	0	17	5	1	3	0	2	1	2	3	1	4	11	10
649639: Bacillus cellulosilyticus DSM 2522	6	114	131	23	254	0	189	13	237	101	1085	15	162	3	15	32	2	3	0	0	0	1	33	30	92	45	2	8	1	1	0	0	26	5	35	1	1	210	16	30	1	1	2	72	5	6	1	255	666
1396: Bacillus cereus	0	3	1	10	17	1	0	2	5	1	33	3	3	2	1	8	0	0	2	2	0	0	1	2	2	4	2	60	0	0	0	0	0	0	1	2	0	3	1	0	0	1	1	3	2	2	0	1	36
526979: Bacillus cereus 95/8201	1	7	6	1	3	0	1	0	0	4	1	4	3	2	0	13	1	5	1	5	1	0	2	4	4	6	1	1	2	5	2	0	5	2	0	3	3	3	0	0	2	0	1	18	0	1	3	8	12
526993: Bacillus cereus AH1272	0	1	1	0	0	0	0	0	0	0	0	1	0	0	0	1	0	0	0	0	0	0	0	0	0	0	0	0	0	0	0	0	0	0	0	0	0	1	0	0	0	0	0	1	0	0	0	0	0
86661: Bacillus cereus group	1	10	1	6	12	0	3	11	12	12	18	34	15	13	8	15	1	13	1	4	5	1	10	10	4	28	5	9	4	2	5	4	2	1	1	5	14	24	6	0	4	0	0	6	4	1	1	7	14
526973: Bacillus cereus m1293	0	12	0	1	0	0	1	0	2	2	0	233	4	0	0	4	19	3	5	1	0	0	136	44	0	2	30	652	352	0	1	0	0	0	3	0	1	4	0	0	151	180	2	0	0	23	105	1	739
526969: Bacillus cereus m1550	6	33	27	6	86	51	128	154	32	78	94	108	93	12	17	77	39	34	59	251	30	2	85	34	145	54	28	18	3	6	4	2	0	3	2	5	35	679	22	6	21	14	12	114	12	50	57	30	29
79880: Bacillus clausii	0	12	2	0	18	0	1	46	5	2	2	3	0	0	0	4	0	3	20	0	0	1	28	7	3	1	8	0	1	1	0	1	2	2	1	0	3	2	0	0	0	0	2	1	4	2	0	3	2
1398: Bacillus coagulans	80	98	96	325	777	0	82	117	242	114	651	723	351	204	563	406	31	233	878	49	61	0	133	127	132	65	102	327	62	90	160	396	19	46	89	219	160	518	0	7	44	2	158	160	63	1	8	170	130
1121088: Bacillus coagulans DSM 1 = ATCC 7050	1	2	1	66	98	0	9	5	42	7	31	6	6	1	1	7	2	1	9	0	0	2	6	1	8	2	0	3	0	0	0	0	0	2	0	1	6	2	0	0	1	0	2	0	5	0	0	16	0
315749: Bacillus cytotoxicus NVH 391-98	0	0	0	1	1	0	0	1	1	0	1	0	0	0	0	2	0	0	0	0	0	0	0	0	0	0	0	0	0	0	0	0	1	0	0	1	0	6	0	0	0	0	0	0	0	0	0	0	0
135735: Bacillus endophyticus	1	0	1	1	2	0	2	6	0	7	4	2	0	2	3	0	1	2	1	0	0	0	2	0	3	2	3	1	0	0	0	0	0	0	0	0	2	2	0	0	8	0	2	35	0	0	1	4	4
1441095: Bacillus gobiensis	0	0	3	3	18	0	1	4	5	4	16	2	0	0	0	0	0	1	0	0	0	0	1	0	2	3	0	0	0	0	0	0	0	0	1	0	6	1	0	1	0	0	1	1	0	0	1	0	5
199441: Bacillus krulwichiae	11	4	10	30	113	2	5	33	46	6	40	3	7	7	14	5	8	0	6	3	0	1	4	1	6	5	1	11	1	1	2	0	0	5	0	0	40	10	0	5	0	0	6	4	1	0	4	7	1
1246626: Bacillus lehensis G1	0	2	0	5	5	0	0	0	2	0	3	6	3	0	1	2	0	0	1	0	0	0	0	0	0	0	1	1	0	0	1	0	0	0	1	0	2	4	0	0	0	0	0	1	0	0	0	1	1
1126218: Bacillus licheniformis WX-02	0	0	0	0	0	0	0	0	0	0	0	2	0	0	0	0	0	8	0	0	0	0	0	0	4	2	0	0	0	0	0	0	0	0	0	0	0	2	0	0	0	0	0	0	0	0	0	0	0
1404: Bacillus megaterium	0	2	0	0	5	0	0	0	2	2	8	2	1	2	0	0	0	0	0	0	0	0	0	0	0	0	1	0	0	0	1	0	1	0	0	0	0	1	0	0	1	0	0	1	0	0	0	1	1
1348623: Bacillus megaterium NBRC 15308 = ATCC 14581	0	0	0	0	0	0	0	0	0	2	1	1	0	0	0	0	0	0	0	0	0	0	0	0	0	0	0	0	0	0	0	0	0	0	0	0	0	1	0	0	0	0	0	1	0	0	0	0	0
1006007: Bacillus megaterium WSH-002	0	31	33	1	27	0	1	13	0	2	2	2	1	194	17	45	0	1	0	2	0	0	1	1	1	0	2	0	2	4	2	0	26	1	3	0	1	2	0	0	0	0	0	0	2	0	0	0	1
796606: Bacillus methanolicus MGA3	0	10	1	6	190	0	4	17	123	1	8	14	1	1	1	6	2	1	112	0	0	0	7	18	2	11	2	15	2	2	2	2	0	13	0	2	13	2	0	21	2	3	1	8	5	0	2	6	11
1196031: Bacillus oceanisediminis 2691	0	5	2	9	13	0	1	8	2	5	8	8	13	2	9	5	0	5	6	1	1	1	3	4	0	0	0	13	1	1	4	5	1	1	1	3	17	1	0	0	0	0	7	1	2	2	0	2	7
398511: Bacillus pseudofirmus OF4	1	47	7	5	68	0	33	130	22	4	79	17	0	9	9	35	0	7	2	2	1	2	6	34	95	0	6	2	1	0	3	0	17	5	2	3	214	75	11	8	1	0	2	43	0	15	4	7	30
1408: Bacillus pumilus	3	4	10	3	33	3	12	33	19	14	23	11	9	48	12	17	11	10	1	5	7	0	7	11	5	10	3	6	0	1	2	1	1	1	0	0	10	5	0	1	2	0	4	9	3	0	4	161	16
1478: Bacillus simplex	0	1	2	1	26	0	0	1	5	0	4	3	0	1	11	2	0	3	0	0	0	0	1	2	2	2	1	0	0	0	1	0	1	2	0	0	1	1	0	1	2	0	0	1	0	0	0	14	4
666686: Bacillus sp. 1NLA3E	2	7	11	13	48	0	3	13	16	0	2	19	22	10	1	24	0	0	7	0	1	2	0	0	0	0	2	7	0	0	0	0	0	0	0	0	20	16	0	0	4	1	0	0	0	1	1	19	4
1581038: Bacillus sp. FJAT-22090	0	6	2	18	69	1	4	14	12	11	41	4	5	3	5	3	1	6	12	0	0	2	2	0	1	1	2	4	0	1	0	1	0	4	0	1	61	2	0	1	1	1	57	4	12	0	2	25	6
98228: Bacillus sp. OxB-1	14	101	30	9	132	0	51	95	51	35	122	29	2	39	103	28	1	24	3	7	31	5	7	16	19	7	8	19	1	3	0	4	0	1	1	4	35	7	0	1	10	0	1	3	18	1	1	54	70
1565991: Bacillus sp. X1(2014)	1	45	2	3	444	0	4	7	5	5	7	11	4	1	5	78	0	14	4	0	0	0	1	4	3	64	2	9	0	1	3	2	0	1	0	1	7	5	0	0	0	0	3	3	2	0	0	136	24
1423: Bacillus subtilis	0	5	0	4	1	0	1	2	4	4	4	4	0	0	1	6	0	1	1	0	0	0	0	0	6	2	1	3	0	0	0	0	0	0	0	2	2	3	1	0	0	0	2	0	1	0	0	2	5
936156: Bacillus subtilis BSn5	0	0	0	0	1	0	0	0	1	0	1	0	0	0	0	0	0	0	0	0	0	0	0	1	0	0	0	1	0	0	0	0	0	0	0	0	0	1	0	0	0	0	0	0	0	0	0	1	0
653685: Bacillus subtilis group	0	1	0	0	24	0	2	0	1	0	8	1	0	2	7	3	0	0	0	0	0	0	0	0	0	3	0	0	0	0	0	0	0	0	0	0	0	1	0	0	0	0	0	6	1	0	0	4	1
483913: Bacillus subtilis subsp. inaquosorum	0	2	0	0	0	0	0	1	0	0	0	0	0	0	0	0	0	0	0	0	0	0	0	0	0	0	0	0	0	0	0	2	0	0	0	0	0	1	0	0	0	0	0	0	0	0	0	0	0
1302650: Bacillus subtilis subsp. subtilis str. BAB-1	0	0	0	1	0	0	0	0	0	0	0	0	0	0	0	0	0	0	0	0	0	0	0	0	0	0	0	0	0	0	0	0	0	0	0	0	0	1	0	0	0	0	0	0	0	0	0	0	0
1257079: Bacillus thuringiensis DAR 81934	0	1	2	1	0	0	0	0	0	0	4	1	2	0	0	0	0	0	0	0	0	0	0	0	2	0	0	0	0	0	0	0	1	0	0	0	0	2	1	0	0	0	1	1	0	0	0	1	1
527020: Bacillus thuringiensis IBL 4222	0	0	1	0	0	0	0	0	0	0	0	0	0	0	0	1	0	0	0	1	0	0	0	3	0	0	0	0	0	0	0	0	0	0	0	0	0	1	0	0	0	0	1	1	0	0	0	0	0
1195464: Bacillus thuringiensis MC28	0	0	0	14	2	0	1	1	2	0	0	1	1	0	1	0	0	2	0	0	0	0	0	0	0	0	0	0	0	0	0	0	0	0	0	0	1	2	0	0	0	0	0	0	0	0	0	0	0
930170: Bacillus thuringiensis serovar finitimus YBT-020	4	4	1	3	30	0	6	20	4	4	8	27	5	4	7	4	1	2	4	6	0	0	3	4	0	1	2	2	0	1	0	2	0	1	0	0	4	2	0	1	0	4	2	2	1	1	0	4	3
29338: Bacillus thuringiensis serovar galleriae	0	0	0	2	1	0	1	0	0	0	0	0	0	1	0	0	0	0	0	0	0	0	1	0	0	0	0	0	0	0	0	0	0	0	0	0	0	1	0	0	0	0	0	0	0	0	0	0	0
527030: Bacillus thuringiensis serovar huazhongensis BGSC 4BD1	134	2502	1363	155	1014	220	502	2291	631	3610	2974	680	105	623	490	1221	472	990	65	1748	322	232	1525	960	1796	6970	1199	1293	232	188	362	26	35	84	418	260	1154	527	846	921	674	281	565	1740	740	235	511	5089	3697
1261129: Bacillus thuringiensis serovar kurstaki str. HD-1	0	3	0	0	12	0	1	0	1	0	1	8	2	0	1	0	0	1	1	0	0	0	0	1	1	2	0	1	0	1	0	0	0	0	0	0	0	2	0	0	0	0	0	4	1	0	1	0	1
527028: Bacillus thuringiensis serovar pulsiensis BGSC 4CC1	0	2	1	0	5	0	1	4	2	13	4	7	1	5	1	1	4	2	2	8	0	0	4	7	8	31	4	1	0	1	0	0	0	0	0	1	7	2	2	1	2	0	2	2	2	0	1	7	8
2: Bacteria	2979	1557	9423	23025	7425	1008	2825	11087	11764	4067	6608	15543	8457	10258	8560	3396	3048	5302	12060	1632	5939	1841	12563	6367	14897	3571	6658	7973	10349	6256	3994	2934	5847	8106	3134	4523	28663	23467	1492	2451	1739	2250	38656	3241	3693	5744	1252	6368	20594
340054: Bacteriophage APSE-2	0	1	0	31	1	1	2	8	4	1	1	4	2	3	6	1	0	4	6	2	0	0	2	5	0	1	2	1	1	1	0	2	0	1	2	0	3	11	0	1	0	2	1	0	4	2	0	4	5
171549: Bacteroidales	1049	766	5090	6634	7579	646	4404	1854	4102	2627	8451	14710	3960	3481	4271	2867	4811	3104	8995	1334	1594	2284	7464	3334	5050	12184	1214	3432	2566	13560	922	1351	1341	1440	1070	1364	10562	7743	2779	1316	383	645	17466	2816	903	2836	601	7738	7627
1400053: Bacteroidales bacterium CF	6	3	14	33	35	0	12	4	36	17	19	61	10	6	11	5	7	11	13	3	16	14	20	27	38	8	10	4	1	284	3	1	18	16	6	4	119	109	2	13	6	0	8	15	11	23	1	11	60
816: Bacteroides	664	1233	3030	6567	4488	62	2881	1132	2878	1649	3613	4680	829	1530	3762	1103	466	798	4698	352	904	580	3648	1250	7184	735	4567	1155	571	11015	1030	418	540	1043	2500	496	4411	3533	166	398	239	196	5172	1893	609	390	47	670	3900
1796613: Bacteroides caecimuris	28	10	12	139	11	1	26	66	13	16	132	33	36	94	148	18	10	6	96	32	15	12	46	8	60	59	14	11	30	79	15	2	7	7	21	19	31	62	8	4	3	4	25	13	15	2	1	50	9
246787: Bacteroides cellulosilyticus	113	36	829	712	305	4	246	466	766	132	197	1874	477	282	366	353	19	265	774	71	270	7	740	262	1366	390	227	134	209	121	145	8	184	30	18	152	116	1343	267	94	14	16	54	281	109	59	7	160	719
679937: Bacteroides coprosuis DSM 18011	7	2	41	42	22	2	159	57	34	49	129	55	26	30	33	17	2	32	214	24	22	8	56	99	28	9	135	9	75	111	14	2	35	16	138	45	40	145	4	7	1	1	61	61	20	123	9	12	277
997877: Bacteroides dorei CL03T12C01	7	33	58	96	47	11	391	13	73	102	198	130	59	22	104	24	4	37	31	50	22	10	51	22	167	247	19	19	16	151	5	2	19	7	9	13	34	177	4	6	5	6	13	39	4	18	0	250	49
817: Bacteroides fragilis	324	155	389	5629	2909	4	992	192	7132	713	1222	1224	433	37	3144	318	57	653	415	199	314	261	1597	818	3931	135	749	672	196	13057	249	33	675	120	366	146	2669	8214	28	500	47	16	160	2541	521	39	3	234	2280
862962: Bacteroides fragilis 638R	1	1	5	18	33	0	9	16	56	20	21	113	21	67	38	9	2	26	1	5	57	6	55	21	40	4	18	5	12	41	16	2	69	7	16	15	88	49	2	10	5	1	5	13	5	0	2	12	115
272559: Bacteroides fragilis NCTC 9343	0	0	4	10	39	0	71	0	20	11	13	49	1	0	12	2	0	0	42	1	1	4	50	6	7	1	2	3	1	21	3	0	0	0	0	2	6	7	3	0	2	0	14	7	0	0	0	8	7
295405: Bacteroides fragilis YCH46	0	0	0	30	22	0	3	8	11	2	32	5	4	7	4	8	0	249	591	3	8	8	16	2	85	0	11	1	5	228	2	0	33	2	5	3	16	75	1	0	1	0	124	2	10	0	0	0	75
693979: Bacteroides helcogenes P 36-108	4	6	29	129	82	4	123	16	109	24	17	160	28	35	31	35	14	23	34	8	33	9	61	17	23	143	21	15	5	264	14	0	24	144	10	13	311	52	47	21	8	1	59	31	14	14	2	59	60
28116: Bacteroides ovatus	22	5	30	151	558	1	416	116	339	54	188	65	10	11	34	15	115	39	46	181	11	120	162	64	211	4	57	12	42	980	15	1	55	10	349	13	46	277	353	65	14	1	398	385	15	28	0	109	72
1379690: Bacteroides ovatus V975	1	0	6	5	126	0	120	4	21	4	21	25	65	6	4	49	0	1	4	0	41	41	5	26	16	0	13	17	4	72	1	1	4	1	8	0	16	84	108	4	0	0	172	5	2	20	0	13	12
667015: Bacteroides salanitronis DSM 18170	236	132	730	3045	2481	13	2827	403	1401	759	1773	1775	2513	585	1018	1164	1643	590	26160	178	854	251	2039	861	2865	794	575	472	1085	4676	598	1116	835	619	594	824	3639	6239	179	309	110	88	502	875	238	754	19	421	3843
818: Bacteroides thetaiotaomicron	3	5	9	40	4	0	22	1	26	52	19	38	4	4	19	13	5	7	84	1	5	1	11	4	16	35	4	1	4	54	2	4	3	7	2	4	8	5	5	1	3	0	32	23	17	2	2	12	107
226186: Bacteroides thetaiotaomicron VPI-5482	14	32	61	91	85	1	95	15	90	31	118	162	96	25	55	28	6	22	37	22	40	4	22	32	130	16	15	20	14	38	10	69	15	7	16	3	52	285	37	6	2	0	13	70	11	11	0	4	96
821: Bacteroides vulgatus	102	262	93	163	745	2	744	11	399	107	276	404	205	140	902	334	15	104	236	75	20	48	164	108	363	29	140	261	213	434	32	6	128	49	129	88	114	794	105	47	10	4	30	187	27	98	2	242	1135
435590: Bacteroides vulgatus ATCC 8482	17	45	33	257	145	2	111	53	205	46	81	542	65	122	359	75	97	47	432	25	53	12	295	31	174	55	17	62	177	1877	101	2	49	117	177	85	391	230	13	189	41	26	1739	161	273	6	0	374	72
976: Bacteroidetes	1166	474	452	5418	7941	68	5625	8611	4859	2487	5311	5682	3936	6248	6576	4660	640	5166	20831	694	2369	704	23513	5084	6773	2154	1393	1348	3155	12004	3078	2044	1424	4358	4153	3290	4992	15771	2205	2243	294	167	5684	1889	1940	1923	396	2911	4170
880074: Barnesiella viscericola DSM 18177	51	296	165	573	529	11	708	324	728	155	1547	1163	433	753	1046	965	61	160	1676	166	352	52	553	173	549	129	183	315	189	3014	151	48	108	569	356	152	391	929	13	75	3	8	275	327	282	9	2	290	665
773: Bartonella	0	1	2	2	2	0	3	1	0	2	2	1	2	0	1	0	0	3	0	0	5	1	0	0	13	0	2	0	0	0	0	2	0	0	0	0	1	1	1	1	2	0	0	0	0	0	4	1	3
1686310: Bartonella apis	0	0	0	0	2	0	0	0	1	0	0	0	1	1	0	0	0	0	0	0	0	0	0	0	2	1	1	0	0	0	0	0	0	0	2	0	0	1	0	0	0	0	0	0	2	0	0	4	0
1933909: Bartonella sp. 114	0	0	0	0	1	0	0	0	0	0	0	0	0	1	0	0	0	0	1	0	0	0	0	2	0	0	0	0	0	0	0	0	0	0	0	0	0	1	0	0	0	0	0	0	0	0	0	0	0
374463: Baumannia cicadellinicola str. Hc (Homalodisca coagulata)	0	0	0	0	0	0	1	0	3	1	1	1	0	1	0	1	0	0	1	0	0	0	1	3	0	1	1	1	0	1	0	0	0	0	1	0	3	1	0	0	1	0	0	0	1	0	0	2	0
765869: Bdellovibrio bacteriovorus W	0	0	0	3	2	0	1	6	2	0	1	2	0	0	2	1	0	0	9	0	3	0	6	0	47	1	1	0	1	0	0	3	1	0	1	0	6	84	0	2	0	0	0	0	0	0	0	0	1
1069642: Bdellovibrio bacteriovorus str. Tiberius	1	0	0	0	0	2	1	1	0	2	2	0	0	0	1	2	0	0	1	0	0	0	0	0	1	0	0	0	0	0	0	0	1	0	0	0	0	1	0	1	0	0	0	0	1	0	0	0	1
1184267: Bdellovibrio exovorus JSS	0	0	0	0	0	0	1	2	0	0	0	1	1	0	0	0	0	0	0	0	0	0	0	0	0	1	2	0	0	0	0	0	0	1	1	0	2	1	0	0	0	0	0	0	0	0	1	0	1
866536: Belliella baltica DSM 15883	1	4	11	1	32	2	0	1	0	0	2	9	5	2	5	0	15	0	0	1	0	0	0	2	1	29	1	4	8	1	0	0	1	1	0	1	5	2	1	0	0	1	0	2	1	3	2	3	0
880071: Bernardetia litoralis DSM 6794	9	2	13	7	13	0	2	5	4	7	5	13	1	3	7	3	17	0	2	18	3	1	10	5	3	12	6	15	0	6	3	0	0	2	5	2	3	5	1	1	2	5	9	8	2	0	3	7	11
28216: Betaproteobacteria	170	1132	577	530	6149	1179	1717	6279	1193	905	1494	4442	1099	2292	891	7246	14	961	19226	504	1990	174	10106	3011	1900	172	1225	1068	1078	8416	4527	236	739	549	2335	3943	12548	15799	86	273	148	86	11782	1562	3551	240	163	707	303
1904640: Betaproteobacteria bacterium GR16-43	0	1	0	1	2	0	5	5	1	5	5	6	11	1	0	5	0	5	63	2	0	0	11	11	1	2	2	3	0	5	2	0	0	1	0	1	5	8	0	2	0	0	1	16	0	0	1	1	4
471853: Beutenbergia cavernae DSM 12333	56	16	48	28	318	2	25	115	41	39	81	107	71	42	5	34	17	2	83	1	3	1	11	58	7	90	9	52	0	23	2	24	14	19	2	1	43	22	13	8	18	14	19	51	20	12	6	22	35
1263829: Bibersteinia trehalosi USDA-ARS-USMARC-188	0	2	2	24	6	0	7	7	3	2	31	22	1	28	12	11	0	0	104	4	4	2	23	35	0	2	14	0	1	0	0	0	1	0	1	1	2	6	0	0	1	0	0	1	7	1	1	7	2
1263832: Bibersteinia trehalosi USDA-ARS-USMARC-190	0	1	1	9	8	0	0	6	0	6	1	2	1	10	2	21	1	0	0	78	1	0	5	4	1	0	3	1	0	1	0	0	0	18	0	2	10	2	0	0	2	0	0	1	2	9	0	9	3
31953: Bifidobacteriaceae	4	11	21	41	188	11	32	63	15	45	19	81	80	5	5	21	568	36	13	13	5	5	48	2	2	87	11	11	9	3	3	43	59	4	11	0	82	1	251	70	7	2	6	132	3	277	40	90	16
1678: Bifidobacterium	24	12	23	141	369	27	22	77	93	238	125	466	146	17	22	56	1094	48	23	35	4	4	457	54	41	103	20	44	12	41	23	133	413	50	26	7	394	108	7002	673	10	10	4	2673	8	4709	487	349	154
1437605: Bifidobacterium actinocoloniiforme DSM 22766	0	0	0	5	4	0	6	0	0	0	3	13	4	1	0	2	10	0	5	0	0	0	4	5	0	4	0	0	2	1	2	3	1	0	1	1	2	4	4	2	0	0	2	6	1	6	0	3	0
1680: Bifidobacterium adolescentis	26	1	8	31	127	4	13	9	302	13	20	50	89	17	22	4	12	7	150	1	3	1	1	37	3	4	5	2	6	8	1	11	15	8	3	11	10	50	23	69	0	4	3	57	2	26	2	2	90
367928: Bifidobacterium adolescentis ATCC 15703	0	0	0	0	2	0	0	2	2	0	1	1	1	1	0	0	5	0	0	1	0	0	0	0	0	2	0	0	0	0	0	0	0	0	0	0	1	1	0	0	0	1	0	0	0	1	0	0	2
28025: Bifidobacterium animalis	6	0	4	18	37	0	14	9	4	8	6	63	3	5	4	1	70	11	4	4	3	1	8	7	4	8	7	6	1	1	2	6	4	3	0	1	8	15	18	2	2	3	0	31	0	33	1	15	28
302911: Bifidobacterium animalis subsp. lactis	0	0	3	100	29	0	49	2	4	0	24	14	20	1	1	0	3	9	0	0	9	0	17	1	2	2	27	1	0	3	1	63	9	0	11	0	101	11	9	17	0	0	0	10	0	24	1	1	12
1167629: Bifidobacterium animalis subsp. lactis ATCC 27673	0	0	0	0	3	0	4	0	0	2	0	0	1	0	0	0	0	0	0	0	0	0	0	0	0	0	0	0	0	0	0	0	1	0	0	0	0	1	0	0	0	0	0	0	0	0	0	0	4
1075106: Bifidobacterium animalis subsp. lactis BLC1	0	0	0	0	0	0	0	0	0	0	0	0	0	0	0	0	0	0	0	0	0	0	0	0	0	0	0	0	0	0	0	0	0	0	0	0	0	6	0	0	0	0	0	0	0	0	0	0	0
580050: Bifidobacterium animalis subsp. lactis Bl-04	0	0	0	0	0	0	0	0	7	0	0	0	0	0	0	0	0	0	0	0	0	0	0	0	0	0	0	0	0	0	0	0	0	0	0	1	0	1	0	1	0	0	0	0	0	0	0	0	0
1042403: Bifidobacterium animalis subsp. lactis CNCM I-2494	0	0	0	0	0	0	0	0	0	0	0	0	0	0	0	0	0	0	0	0	0	0	0	0	0	0	0	0	0	0	0	0	0	0	0	0	0	3	0	0	0	0	0	0	0	0	0	0	0
1316911: Bifidobacterium animalis subsp. lactis KLDS2.0603	0	0	0	26	2	0	0	0	0	0	0	0	0	0	0	0	0	0	0	0	0	0	2	1	0	0	0	0	0	0	0	0	1	0	0	0	0	1	62	1	0	0	0	26	0	27	9	19	0
1681: Bifidobacterium bifidum	4	1	7	4	26	1	2	11	6	6	7	50	2	3	4	1	14	6	3	5	0	0	5	5	3	1	1	1	1	1	0	7	1	4	0	2	1	2	2	7	0	0	0	27	0	6	0	3	17
484020: Bifidobacterium bifidum BGN4	0	0	0	0	11	0	0	0	1	3	2	1	0	0	0	1	1	0	0	0	0	1	0	2	0	0	0	0	1	1	0	0	0	0	0	0	0	1	0	0	0	0	0	2	0	0	0	1	2
883062: Bifidobacterium bifidum S17	1	0	0	4	1	0	23	0	0	2	3	1	1	3	1	1	1	5	0	0	0	0	0	1	2	0	0	0	0	0	0	0	0	0	0	0	1	2	0	0	0	0	0	1	0	1	0	2	1
1685: Bifidobacterium breve	6	0	1	16	6	0	0	0	4	17	8	13	33	1	1	1	0	3	0	0	0	5	26	9	0	0	0	0	1	4	3	8	18	1	2	0	1	9	574	50	0	3	3	191	0	392	23	5	2
1385939: Bifidobacterium breve JCM 7017	0	0	1	0	5	0	3	1	1	0	1	1	0	0	0	1	1	0	0	0	0	0	1	0	0	0	1	0	0	0	0	0	1	0	0	2	0	1	2	0	0	0	0	20	0	7	0	3	0
936351: Bifidobacterium breve S27	1	0	0	0	3	0	0	1	3	0	1	1	0	0	2	0	0	0	0	0	1	0	0	4	0	0	0	0	0	0	0	1	1	2	0	0	0	1	14	2	0	0	0	11	0	33	0	0	6
1687: Bifidobacterium coryneforme	0	0	0	1	8	2	0	1	1	3	1	1	0	0	1	0	13	1	0	0	0	0	0	0	2	6	0	0	0	0	1	1	2	0	0	0	0	3	2	2	0	2	1	0	1	1	1	1	0
1447716: Bifidobacterium kashiwanohense PV20-2	0	0	1	0	0	0	1	1	0	1	0	4	2	0	0	0	1	1	0	15	0	0	11	2	0	0	1	0	0	3	1	0	0	0	0	0	2	7	0	0	0	0	0	1	0	0	1	0	0
216816: Bifidobacterium longum	5	1	6	45	67	2	7	12	18	161	77	316	3	5	2	12	5	9	10	10	2	0	142	12	5	13	3	2	3	3	7	36	353	4	2	2	7	19	3858	272	1	2	0	4393	4	3407	179	139	27
1679: Bifidobacterium longum subsp. longum	42	11	27	91	192	1	22	42	161	17	21	101	9	11	0	21	2	12	7	1	4	1	18	14	2	6	2	7	0	0	0	1	12	1	0	0	34	48	239	39	0	13	4	222	36	133	18	14	8
890402: Bifidobacterium longum subsp. longum BBMN68	0	0	0	1	0	0	0	0	0	1	0	5	1	0	5	0	0	0	0	0	0	0	1	1	0	0	0	0	0	3	0	1	0	0	0	2	0	2	19	0	0	0	0	26	0	13	1	0	0
565042: Bifidobacterium longum subsp. longum JCM 1217	0	0	0	0	0	0	0	0	0	4	0	5	0	1	0	2	0	0	0	0	0	0	3	0	0	1	0	0	0	1	0	0	1	0	0	0	0	2	19	1	0	0	0	20	0	25	0	0	0
547043: Bifidobacterium pseudocatenulatum DSM 20438 = JCM 1200 = LMG 10505	1	2	0	3	2	0	3	2	0	1	2	14	0	1	0	0	3	1	0	0	0	0	1	0	3	1	0	0	0	0	0	0	1	1	0	0	1	4	4	1	0	0	0	0	0	1	0	4	1
1150461: Bifidobacterium scardovii JCM 12489 = DSM 13734	2	2	3	11	20	0	7	2	6	3	11	23	26	1	3	2	0	1	1	1	0	1	2	8	17	1	1	3	0	2	4	2	0	0	1	1	2	3	2	4	0	1	12	20	0	2	2	1	16
1254439: Bifidobacterium thermophilum RBL67	0	1	0	0	16	1	7	3	7	6	4	3	2	4	1	1	23	67	1	7	0	0	7	3	4	0	1	2	5	0	1	0	1	0	0	0	75	1	1	1	2	1	6	4	2	1	4	10	10
1079: Blastochloris viridis	0	1	3	2	7	0	1	0	2	4	4	4	1	0	0	1	0	5	0	1	1	0	0	0	18	1	2	0	0	1	0	0	0	0	0	0	1	3	0	0	0	0	6	0	1	0	0	2	5
1146883: Blastococcus saxobsidens DD2	4	0	0	3	1	0	4	1	3	0	4	3	2	2	4	0	1	3	1	2	0	0	0	2	2	1	7	0	0	14	0	0	0	0	1	0	1	5	0	2	0	0	2	0	1	1	1	3	2
34098: Blattabacterium	1	0	2	12	6	0	6	3	11	2	2	18	2	1	0	9	0	8	15	1	0	1	6	4	6	0	0	0	3	26	2	2	1	4	5	3	12	12	3	0	0	0	0	5	4	0	0	7	1
331104: Blattabacterium sp. (Blattella germanica) str. Bge	0	0	0	4	12	0	1	6	4	0	5	13	0	22	7	8	0	2	25	0	1	0	14	9	3	0	1	3	1	3	0	0	0	2	4	3	12	4	0	0	0	0	1	2	2	3	0	1	0
1796616: Blautia sp. YL58	18	18	14	68	115	1	75	30	35	289	200	109	114	17	39	14	1	16	55	4	24	5	144	22	123	14	28	20	6	3	3	52	17	11	12	6	18	164	39	14	16	5	4	49	3	23	6	69	511
517: Bordetella	0	41	1	1	75	2	16	141	72	30	173	5	32	117	0	973	1	17	14	22	46	0	125	3	2	2	145	61	0	3	0	0	0	2	2	0	29	5	2	1	8	0	14	93	7	0	0	6	0
103855: Bordetella hinzii	0	0	1	0	0	1	1	3	0	21	0	20	0	8	0	1	0	2	1	0	0	0	9	2	0	0	0	2	0	0	2	0	1	0	0	0	2	6	0	1	0	0	4	1	1	0	0	0	0
47466: Borrelia miyamotoi	0	0	6	0	62	0	0	1	3	9	2	16	3	16	3	3	27	5	20	5	2	7	28	6	13	48	1	15	4	0	0	2	0	3	0	2	62	2	0	0	1	4	32	11	7	6	0	27	0
1643685: Borreliaceae	0	1	1	0	2	0	0	1	0	0	0	0	0	0	0	0	0	0	1	0	0	0	0	0	0	0	1	0	0	0	0	0	0	0	0	0	0	3	0	0	0	0	0	0	1	0	0	0	0
139: Borreliella burgdorferi	0	0	0	0	0	0	1	0	1	0	1	0	1	0	0	0	0	0	0	0	0	0	0	0	0	0	0	0	0	0	0	0	0	0	0	0	0	1	0	0	0	0	0	0	0	0	0	0	1
446465: Brachybacterium faecium DSM 4810	153	1	62	133	238	8	205	54	223	60	210	1471	235	18	211	17	126	36	48	33	46	2	74	297	114	37	55	54	59	78	22	217	148	61	9	64	110	609	77	202	5	52	516	66	14	341	28	29	2749
1903186: Brachybacterium sp. P6-10-X1	5	0	19	1	33	1	8	9	17	3	3	12	4	7	4	1	22	12	10	4	0	0	3	19	3	14	9	0	5	3	0	0	1	2	1	0	7	10	1	18	2	0	2	9	1	1	2	2	29
476282: Bradyrhizobium japonicum SEMIA 5079	0	0	0	0	1	0	0	0	0	0	0	0	0	0	1	0	0	0	1	0	0	0	0	1	0	0	0	0	0	0	0	0	1	0	0	0	0	2	0	0	0	0	0	2	0	0	0	0	0
46226: Branhamella	0	0	0	0	1	0	0	0	0	0	0	0	0	0	0	0	0	0	0	0	0	0	0	1	0	0	0	0	0	0	0	0	0	0	0	0	1	1	0	0	0	0	0	0	0	0	0	0	0
55080: Brevibacillus	0	2	2	3	9	0	2	3	1	0	4	2	1	1	0	3	1	1	0	0	1	0	0	2	2	2	0	6	1	0	0	0	0	2	0	0	1	1	0	0	1	0	31	1	1	1	1	0	0
358681: Brevibacillus brevis NBRC 100599	4	9	4	8	22	3	7	22	30	12	10	23	1	16	9	21	0	3	4	5	8	3	4	7	4	2	0	2	45	2	1	4	45	1	0	2	6	7	0	17	0	3	0	2	6	3	3	14	4
1042163: Brevibacillus laterosporus LMG 15441	25	13	30	85	139	1	155	86	71	57	231	101	124	40	89	58	2	9	358	7	17	5	33	48	43	24	9	73	13	22	6	263	22	8	5	14	96	101	9	2	3	5	11	19	13	10	8	34	82
1703: Brevibacterium linens	60	12	64	151	713	9	65	106	291	53	61	97	19	18	18	13	26	14	54	8	13	2	30	51	39	22	17	9	9	18	5	4	15	38	11	2	54	40	12	28	3	45	19	25	95	14	8	49	51
41275: Brevundimonas	0	2	2	2	0	3	0	5	0	2	4	9	1	0	0	2	0	6	2	3	0	0	31	1	2	4	20	1	0	0	0	1	0	2	0	2	0	2	0	0	0	0	13	3	2	1	3	12	2
1532555: Brevundimonas sp. DS20	0	0	0	0	1	2	0	0	1	2	0	0	0	0	0	0	0	0	0	1	0	0	0	0	0	0	1	0	0	0	0	0	0	0	0	0	0	1	1	0	0	1	0	0	0	0	0	3	1
1938605: Brevundimonas sp. LM2	0	0	0	0	0	0	0	0	2	0	1	2	0	0	0	0	0	0	0	0	0	0	0	0	0	2	0	0	1	0	0	1	1	0	0	0	0	1	0	0	0	0	2	4	0	0	0	0	0
234: Brucella	1	0	1	22	33	40	5	24	9	5	5	186	6	12	12	48	0	16	7	0	0	0	1	10	15	2	0	7	6	26	1	8	0	31	2	35	141	1529	0	18	0	0	3	11	5	68	6	3	13
118882: Brucellaceae	0	0	0	0	0	4	0	0	0	0	0	0	0	0	1	0	0	1	0	0	0	0	0	0	0	0	1	0	0	0	0	0	0	1	0	0	0	1	0	0	0	1	0	1	0	0	0	0	0
655384: Buchnera aphidicola (Cinara pseudotaxifoliae)	0	0	0	0	0	0	0	0	0	0	0	0	0	0	0	0	0	0	0	0	0	0	0	0	0	0	0	0	0	0	0	0	0	0	0	0	0	1	0	0	0	0	0	0	0	0	0	0	0
118110: Buchnera aphidicola (Schlechtendalia chinensis)	0	0	0	0	0	0	0	0	0	2	0	6	1	0	0	1	0	0	4	4	0	0	0	0	0	1	2	0	0	0	0	0	0	0	0	0	0	1	0	0	0	0	0	0	0	0	2	0	0
224915: Buchnera aphidicola str. Bp (Baizongia pistaciae)	0	0	0	0	0	0	0	0	1	2	0	0	0	0	1	0	0	0	0	0	0	0	0	0	0	0	1	0	0	0	0	0	0	0	0	0	0	1	0	0	0	0	0	0	0	0	0	0	0
1910950: Bullavirinae	2	1	0	1	0	0	0	0	0	0	2	1	0	0	0	0	0	0	1	0	0	0	0	3	0	0	0	0	0	0	2	0	0	2	2	0	2	3	0	0	0	0	1	0	0	0	0	0	4
32008: Burkholderia	1	3	0	5	8	3	3	17	10	11	30	4	10	2	0	14	0	1	9	6	12	0	10	2	4	1	4	3	1	2	1	0	1	0	4	1	14	10	0	2	0	0	6	10	5	1	1	10	2
95486: Burkholderia cenocepacia	0	0	0	0	5	0	0	2	0	1	0	0	0	0	0	0	0	0	1	1	0	0	0	0	0	0	1	0	0	0	1	0	0	0	0	0	0	3	0	0	1	0	0	0	0	0	0	1	2
28095: Burkholderia gladioli	0	0	0	0	0	0	0	1	0	0	0	0	0	0	0	0	0	0	0	0	0	0	2	1	0	0	1	0	0	0	0	0	0	0	0	0	0	1	0	0	0	0	0	0	0	0	0	0	0
595500: Burkholderia glumae PG1	0	0	0	0	0	1	0	0	0	0	0	0	0	0	1	0	0	0	0	0	0	0	0	0	0	0	0	0	0	0	0	0	0	0	0	0	0	1	0	0	0	0	0	0	0	0	0	1	0
985079: Burkholderia multivorans ATCC BAA-247	0	0	0	0	0	0	0	0	0	0	0	0	0	0	0	0	0	0	0	0	0	0	0	1	0	0	0	0	0	0	0	0	0	0	0	0	0	1	0	0	0	0	0	0	0	0	0	0	0
640511: Burkholderia sp. CCGE1002	1	0	4	0	13	0	4	0	2	1	4	0	1	0	0	3	0	6	4	0	1	0	22	2	13	0	5	0	0	2	0	0	1	0	0	0	0	7	0	1	1	0	0	10	0	0	0	6	1
271848: Burkholderia thailandensis E264	0	0	0	0	2	0	0	1	0	0	0	1	0	1	0	1	0	0	0	1	0	0	3	0	0	0	1	1	2	2	0	0	1	0	2	1	0	1	0	0	0	0	0	0	0	0	0	1	0
119060: Burkholderiaceae	2	39	16	6	99	81	58	209	133	74	85	92	40	16	26	773	2	144	183	121	151	3	394	102	99	50	120	34	7	10	21	2	9	19	100	2	175	127	1	2	16	21	274	76	127	13	31	21	4
80840: Burkholderiales	26	198	194	117	210	139	337	461	417	254	545	311	246	1120	936	3389	26	560	2351	173	275	35	4218	186	639	119	192	261	173	243	148	153	94	232	387	61	2848	551	42	19	95	53	604	504	705	74	101	2506	56
224471: Burkholderiales Genera incertae sedis	0	3	2	1	39	13	4	5	8	9	0	10	1	2	0	5	0	7	4	0	1	1	11	0	7	5	2	43	1	1	0	2	1	4	0	4	21	5	3	1	0	5	102	9	190	1	7	10	1
1469502: Burkholderiales bacterium GJ-E10	0	9	22	3	59	0	47	195	45	10	71	85	69	0	5	734	0	9	1116	39	72	2	237	129	32	0	36	62	20	100	63	3	2	10	191	1	252	136	0	0	15	3	79	60	154	11	1	1	0
864051: Burkholderiales bacterium JOSHI_001	1	33	11	0	9	7	4	31	38	11	25	5	4	2	0	83	0	2	30	10	4	0	21	27	4	7	16	9	5	5	6	0	3	11	12	2	35	6	1	1	1	7	21	19	10	0	8	10	2
1834205: Burkholderiales bacterium YL45	1	25	0	0	32	0	68	31	18	67	18	166	101	1	6	127	0	4	30	2	24	0	68	7	0	0	21	2	5	7	9	0	1	4	7	0	39	9	5	0	6	0	28	88	11	4	1	6	1
830: Butyrivibrio	21	0	1	20	38	1	15	16	27	229	17	16	14	5	8	6	0	6	1	0	2	1	10	5	16	2	7	1	3	3	14	0	6	1	7	1	1	47	1	1	0	0	1	28	0	3	3	37	958
185008: Butyrivibrio hungatei	67	1	5	53	85	1	289	13	259	168	208	59	28	16	69	25	0	15	5	4	32	12	29	33	82	6	49	15	5	2	4	1	32	11	6	29	23	101	7	11	7	1	0	47	6	6	0	52	1397
515622: Butyrivibrio proteoclasticus B316	40	37	51	63	188	0	175	165	125	330	213	410	82	45	173	56	1	52	6	4	48	8	211	111	215	8	90	155	22	10	11	18	53	31	14	23	78	500	8	28	6	2	4	271	8	75	21	839	1238
273068: Caldanaerobacter subterraneus subsp. tengcongensis MB4	0	1	0	5	6	0	4	5	0	0	5	3	12	9	1	0	0	0	3	0	0	0	25	3	47	2	2	23	0	2	4	1	2	2	1	1	16	12	19	1	0	0	0	1	0	3	0	4	5
632516: Caldicellulosiruptor lactoaceticus 6A	0	0	0	0	0	0	0	0	0	0	0	0	0	0	0	0	0	1	0	0	0	0	0	0	0	0	0	0	0	0	0	3	0	0	0	0	0	1	0	0	0	0	0	0	0	0	0	0	1
880073: Caldithrix abyssi DSM 13497	37	11	16	159	295	13	24	242	2	0	0	389	36	253	84	78	0	792	47	81	95	2	6	39	181	308	119	155	120	0	9	0	6	307	31	33	615	201	25	71	8	8	19	48	98	1	83	130	19
194: Campylobacter	509	577	483	4416	3741	51	4461	3634	1238	1629	1093	1896	546	2584	2058	356	1347	625	3606	1015	725	135	5464	1686	1401	1271	628	747	383	439	290	187	1424	290	472	534	1998	8350	293	1192	99	12	382	1917	884	483	165	1999	2529
195: Campylobacter coli	0	0	0	0	0	0	1	7	0	1	2	0	0	0	1	0	0	1	0	0	1	0	4	4	0	0	0	0	0	0	0	0	0	0	0	0	0	1	0	0	0	0	0	0	0	0	0	0	0
199: Campylobacter concisus	2168	5393	7939	1593	12757	26	9172	35917	20287	28043	15273	18611	6185	10569	33402	3690	1449	8786	391	2757	11480	1517	14774	7014	14650	1821	8682	3153	1168	477	904	405	1236	483	1430	896	11710	5965	997	5023	301	4	761	4815	3533	1457	595	22307	49503
360104: Campylobacter concisus 13826	250	712	1467	1140	3868	18	3028	1264	958	6941	1918	2113	1052	612	465	545	47	622	449	246	1537	203	3632	1424	1791	249	936	434	90	253	105	37	868	161	183	95	1301	2365	269	928	62	1	31	1156	155	271	93	4919	8865
1031742: Campylobacter cuniculorum LMG 24588	0	0	0	19	8	0	18	0	0	0	1	0	0	1	1	1	13	1	53	0	0	0	51	8	0	3	0	1	0	0	0	0	11	0	0	2	4	161	2	0	0	0	1	0	1	0	0	0	1
360105: Campylobacter curvus 525.92	87	35	108	146	321	1	389	358	208	264	135	243	51	658	323	46	184	97	273	268	61	8	669	95	225	482	49	117	22	28	43	25	90	21	30	306	282	521	24	123	3	1	2	67	25	30	9	193	511
196: Campylobacter fetus	12	29	2	46	199	0	308	217	14	3	25	6	2	34	30	4	38	3	205	3	1	1	211	63	9	6	1	25	0	4	27	0	59	16	2	1	16	638	0	7	1	2	2	1	7	6	3	4	18
1240980: Campylobacter fetus subsp. fetus 04/554	3	2	0	28	4	0	19	0	0	2	7	0	5	1	0	0	1	0	25	0	0	0	40	15	1	1	0	2	0	0	0	0	48	0	0	0	0	106	0	2	0	0	0	0	0	0	0	0	1
360106: Campylobacter fetus subsp. fetus 82-40	0	0	0	1	2	0	2	1	0	0	0	1	0	0	0	0	1	0	0	1	0	0	0	0	0	0	0	0	0	0	0	0	8	0	0	0	0	6	0	1	0	0	0	0	0	0	0	0	1
1507806: Campylobacter fetus subsp. testudinum	0	1	0	2	4	0	19	36	0	0	8	13	0	1	2	10	4	1	0	0	1	0	27	1	6	1	0	1	0	0	1	6	8	1	0	0	0	36	0	1	0	0	0	0	0	0	0	0	38
1244528: Campylobacter fetus subsp. testudinum 03-427	21	0	0	5	2	0	17	4	0	0	0	9	3	0	0	1	2	4	4	0	1	0	11	4	19	2	5	0	0	0	1	0	3	0	1	0	2	24	0	0	0	0	0	0	2	0	0	0	10
1244529: Campylobacter fetus subsp. testudinum Sp3	0	1	1	0	4	0	15	14	2	1	0	0	0	2	1	0	0	0	33	0	1	0	3	1	0	4	1	0	0	1	0	0	2	0	1	0	4	7	0	0	0	0	0	0	0	0	0	0	7
32020: Campylobacter fetus subsp. venerealis	0	0	0	6	4	0	4	0	0	0	1	22	0	2	1	0	0	2	0	0	0	0	1	3	6	2	0	0	0	0	0	0	1	0	0	0	2	21	2	0	0	0	0	0	0	0	0	1	0
1093099: Campylobacter fetus subsp. venerealis 97/608	0	4	0	24	6	0	11	26	0	14	49	3	9	49	7	0	0	26	396	8	16	0	554	147	14	1	0	31	0	22	0	3	13	0	9	9	31	600	2	0	1	0	20	3	0	8	0	10	10
688354: Campylobacter fetus subsp. venerealis str. 84-112	0	0	0	2	7	0	0	9	0	0	0	0	0	0	0	0	0	0	0	0	0	0	0	0	0	0	0	0	0	0	0	0	0	0	0	0	0	3	0	0	0	0	0	0	0	0	0	0	0
824: Campylobacter gracilis	171	18	85	1607	2131	97	2279	686	380	96	424	415	64	959	380	211	1638	208	426	139	33	4	3727	708	129	2961	86	557	44	36	13	17	166	34	18	38	524	3018	263	238	68	82	53	96	264	140	42	226	137
28898: Campylobacter helveticus	0	0	0	0	1	0	17	0	1	0	0	0	0	0	2	0	1	0	0	0	1	0	2	27	0	7	0	3	0	0	0	0	2	0	0	0	0	168	0	0	0	0	3	0	0	0	0	0	2
360107: Campylobacter hominis ATCC BAA-381	125	2	3	3357	523	6	1986	28	10	5	314	43	2	42	19	3	37	14	3877	3	2	0	3515	1113	4	98	5	71	7	35	0	34	491	10	0	30	49	7684	7	9	19	1	29	1	11	1	3	9	16
1031746: Campylobacter hyointestinalis subsp. hyointestinalis LMG 9260	0	0	1	22	13	0	33	4	0	3	9	3	0	11	5	1	0	0	1	0	1	0	23	3	2	0	1	0	0	0	0	0	18	1	11	0	0	66	0	7	0	0	0	0	2	0	0	5	6
91353: Campylobacter hyointestinalis subsp. lawsonii	2	1	0	48	70	0	207	4	4	8	12	3	28	5	13	4	2	0	5	0	6	0	108	11	34	12	3	1	0	2	0	0	7	1	0	0	5	126	0	1	0	0	0	0	0	2	0	13	16
1244531: Campylobacter iguaniorum	0	0	0	37	49	0	100	18	3	6	4	6	2	4	6	0	2	0	10	15	1	0	94	34	13	1	0	1	2	2	2	0	14	0	1	0	2	320	0	0	0	0	0	4	0	1	0	4	28
1031564: Campylobacter insulaenigrae NCTC 12927	0	0	0	1	0	0	0	0	0	1	0	0	0	0	0	0	0	0	0	0	0	0	2	0	6	0	1	0	0	0	0	0	0	0	0	1	1	3	0	0	0	0	0	2	2	0	0	1	0
197: Campylobacter jejuni	0	0	0	3	0	0	1	5	0	0	0	1	0	2	1	0	1	0	16	0	0	1	3	2	1	0	0	1	0	0	0	0	0	0	0	0	4	3	0	0	0	0	0	2	0	2	14	0	5
1388753: Campylobacter peloridis LMG 23910	0	0	3	2	5	0	0	0	0	2	5	5	6	0	9	0	0	0	1	0	2	0	3	1	4	0	0	0	0	0	0	0	0	0	0	4	4	14	0	0	0	0	0	11	0	0	0	3	3
1660067: Campylobacter pinnipediorum subsp. pinnipediorum	110	19	43	274	351	1	640	295	141	103	164	165	72	81	180	14	60	42	413	47	58	11	396	170	112	42	39	24	12	22	10	21	181	25	56	32	147	1220	19	51	2	0	19	27	17	37	9	116	273
1660070: Campylobacter sp. RM18020	1	0	0	1	43	0	13	5	0	1	8	4	0	11	0	0	9	0	0	8	0	0	4	11	26	4	0	0	0	0	0	0	7	8	0	0	7	8	2	8	0	0	3	0	0	0	0	1	53
1660071: Campylobacter sp. RM18021	6	0	3	9	50	0	35	11	4	46	11	41	5	310	3	3	31	1	1	12	17	0	26	12	5	55	0	4	2	6	3	0	25	2	11	5	45	57	1	22	1	0	1	4	0	6	0	22	63
1032069: Campylobacter ureolyticus RIGS 9880	12	0	2	91	130	0	342	35	12	1	39	13	7	23	20	0	7	0	20	1	3	1	159	51	3	8	2	4	3	3	6	1	34	4	1	7	9	298	1	0	1	0	1	1	0	2	0	6	39
72294: Campylobacteraceae	6	4	11	71	127	0	75	6	7	2	19	31	12	20	15	7	14	10	128	1	12	1	142	130	15	8	11	7	5	18	0	7	59	2	4	5	26	488	6	12	5	0	2	4	2	19	1	27	90
213849: Campylobacterales	130	51	100	1173	318	7	202	156	77	206	103	534	124	54	140	2600	223	138	693	85	90	37	242	243	227	85	41	88	61	60	18	41	163	49	35	110	233	2196	127	176	14	2	18	45	30	63	18	175	402
1535326: Candida	2	0	1	3	1	3	0	4	2	5	5	1	0	13	0	8	743	27	0	0	0	0	40	0	0	35	3	0	2	0	0	48	0	0	0	2	0	40	92	1	13	54	0	0	1	113	1	0	64
237561: Candida albicans SC5314	2	2	2	14	4	7	12	706	2	49	21	2	0	12	0	9	3182	66	4	29	2	0	52	1	3	228	10	12	8	4	0	75	4	16	4	9	5	148	330	1	103	164	2	0	2	722	6	5	240
573826: Candida dubliniensis CD36	0	5	1	1	3	1	2	13	1	2	6	1	0	0	0	15	281	5	6	2	1	0	11	3	4	9	2	1	2	0	0	0	0	0	1	1	2	5	14	1	4	6	7	4	3	47	2	5	9
284593: Candida glabrata CBS 138	0	1	0	0	0	0	3	2	3	2	1	8	0	1	0	0	4	2	0	0	2	0	7	2	1	4	0	14	9	0	0	7	4	3	0	0	0	2	1	0	5	8	2	0	1	9	1	1	19
522306: Candidatus Accumulibacter phosphatis clade IIA str. UW-1	0	1	0	0	6	0	1	15	2	2	5	1	0	2	1	5	0	1	0	0	0	0	5	2	0	0	0	4	0	0	2	0	0	0	0	0	1	2	0	1	0	0	0	2	3	0	3	0	4
452471: Candidatus Amoebophilus asiaticus 5a2	0	1	0	1	0	0	0	0	3	1	0	6	0	3	0	0	1	0	0	0	2	0	1	0	1	2	1	2	0	0	0	0	0	0	0	0	2	1	0	0	1	0	0	0	0	0	0	0	2
49082: Candidatus Arthromitus	1	9	3	135	195	2	13	10	54	48	34	37	20	14	21	16	1	13	31	1	2	2	18	9	13	6	17	16	3	3	3	0	0	27	1	8	176	8	0	2	1	0	6	6	15	0	16	9	6
1508644: Candidatus Arthromitus sp. SFB-mouse-NL	0	1	0	0	0	0	0	0	0	1	0	2	0	0	0	0	0	2	0	0	0	0	0	0	1	0	1	0	0	1	0	0	0	0	0	0	0	1	0	0	0	0	0	0	0	0	0	0	1
511435: Candidatus Azobacteroides pseudotrichonymphae	0	3	0	16	44	14	2	7	81	1	8	3	0	112	20	11	1	0	2	0	0	0	7	1	8	476	7	2	1	2	0	0	4	0	4	1	31	2	29	4	6	0	7	3	68	0	3	28	5
511995: Candidatus Azobacteroides pseudotrichonymphae genomovar. CFP2	8	18	54	67	100	5	59	423	41	20	97	52	3	74	546	479	88	4	5	12	24	0	13	18	9	515	51	68	21	29	31	2	0	9	6	18	42	10	7	25	9	7	1	25	21	0	6	219	64
673862: Candidatus Babela massiliensis	0	0	1	0	2	0	0	2	0	0	0	0	0	2	0	0	0	0	0	0	0	0	0	0	1	1	0	0	0	0	0	0	0	0	0	0	1	1	2	0	0	0	1	1	0	0	0	0	1
1621989: Candidatus Desulfofervidus auxilii	1	0	1	3	2	1	0	1	3	0	0	1	0	3	1	0	0	1	0	0	1	0	0	0	1	0	4	0	0	1	0	0	2	2	0	0	0	1	0	0	0	0	2	2	2	0	0	1	13
1070130: Candidatus Gullanella endobia	0	0	0	1	0	0	0	0	1	0	1	0	0	0	0	1	0	0	0	0	0	0	0	0	0	0	0	0	0	0	0	0	0	0	0	0	0	1	0	0	0	0	0	0	0	0	0	0	0
1778263: Candidatus Hoaglandella endobia	0	0	0	0	0	0	0	0	1	1	0	0	0	0	0	0	0	0	0	0	0	0	0	1	0	0	0	0	0	0	0	0	0	0	0	0	0	2	0	0	0	0	0	0	0	1	0	0	0
1541959: Candidatus Izimaplasma sp. HR1	0	0	0	7	35	2	4	1	8	10	17	4	1	0	1	0	0	0	0	1	0	1	6	0	1	1	6	4	0	0	0	0	2	0	1	0	2	1	0	0	3	0	1	2	0	0	1	24	2
1208922: Candidatus Kinetoplastibacterium blastocrithidii TCC012E	0	0	0	0	0	0	0	0	0	0	0	0	0	0	0	4	0	0	0	0	0	0	0	0	0	0	0	0	0	0	0	0	0	0	0	0	3	1	0	0	0	0	0	1	0	0	0	0	0
1208918: Candidatus Kinetoplastibacterium crithidii TCC036E	0	0	0	0	1	0	0	0	0	0	0	0	1	0	0	7	0	0	5	1	0	0	2	0	0	0	0	0	0	0	0	0	0	0	0	0	0	1	0	0	0	0	0	0	0	1	0	0	0
1208920: Candidatus Kinetoplastibacterium oncopeltii TCC290E	0	11	0	23	0	0	42	11	65	14	10	1	2	54	5	6	0	0	0	0	0	0	121	0	0	0	0	3	39	0	23	0	0	0	1	0	7	19	0	0	1	0	1	0	0	1	14	51	19
34019: Candidatus Liberibacter	0	0	0	0	0	0	0	0	1	0	1	0	0	0	0	0	0	0	0	0	0	0	0	0	0	0	0	0	0	0	0	0	0	0	0	0	0	1	0	0	0	0	0	1	0	0	0	0	0
1581680: Candidatus Methylopumilus turicensis	1	4	0	26	10	1	3	3	5	57	22	29	13	3	1	1	0	69	4	0	0	3	51	62	112	0	36	2	0	1	1	0	24	1	3	1	3	360	0	0	0	0	1	12	4	54	1	1	0
1715989: Candidatus Nitrospira inopinata	4	10	2	9	4	0	11	1	12	12	5	2	1	5	0	1	0	0	0	1	1	0	0	5	5	0	0	3	0	0	0	0	0	0	0	0	17	35	0	0	0	0	0	1	0	0	2	2	7
1235990: Candidatus Pantoea carbekii	0	5	0	1	6	2	0	2	2	0	2	1	2	0	0	0	0	0	0	0	0	0	1	1	1	0	1	2	0	0	0	0	0	1	2	1	4	7	0	2	0	0	1	0	1	0	1	0	2
33926: Candidatus Phytoplasma	0	0	0	3	12	0	1	1	5	1	1	1	1	1	1	2	0	2	0	1	0	0	5	1	6	1	2	2	1	0	0	0	0	0	1	0	2	3	0	0	0	0	2	3	0	0	0	1	3
37692: Candidatus Phytoplasma mali	0	0	1	1	1	0	0	0	1	5	7	3	0	0	2	0	0	0	1	0	0	0	0	0	1	0	0	0	0	0	0	0	0	0	0	0	0	10	1	0	0	0	0	5	1	0	0	1	17
669502: Candidatus Profftella armatura	0	1	2	1	11	0	5	2	4	2	1	2	0	3	2	2	0	0	1	0	0	5	4	1	6	0	9	0	0	0	1	0	1	0	1	0	1	1	0	0	0	1	1	5	1	0	0	0	3
488538: Candidatus Puniceispirillum marinum IMCC1322	1	0	0	0	0	0	0	0	0	1	0	1	0	0	1	0	0	0	0	0	0	0	0	0	0	0	2	0	0	0	0	0	0	0	0	0	0	1	0	0	0	0	0	0	0	0	0	1	0
401619: Candidatus Riesia pediculicola	1	0	1	1	0	0	0	0	0	1	0	2	0	0	1	0	0	0	0	0	0	0	1	0	0	0	0	0	0	0	0	0	0	0	0	0	0	3	0	0	0	0	0	1	1	0	0	1	0
1476577: Candidatus Saccharibacteria oral taxon TM7x	5314	317	3406	3512	18680	18	10617	2104	2049	18818	4860	3714	5229	214	1111	2037	10	18271	620	3870	1246	3072	16937	12059	2116	336	2105	2377	6026	1601	2055	1951	12605	802	6740	409	3381	12695	2903	46	366	89	290	8466	421	1135	146	282	36561
234267: Candidatus Solibacter usitatus Ellin6076	0	1	0	1	0	0	0	0	3	0	0	1	1	0	0	0	0	3	1	0	0	0	1	1	0	0	1	0	0	0	0	0	0	0	0	0	2	5	2	0	1	1	0	3	0	0	0	0	0
336810: Candidatus Sulcia muelleri	1	0	2	0	0	0	1	0	0	0	1	0	0	1	1	0	2	0	5	0	1	0	0	4	0	0	0	0	0	0	0	0	0	0	0	0	19	3	2	0	0	0	0	7	7	0	0	0	0
946483: Candidatus Symbiobacter mobilis CR	0	0	0	2	1	1	1	0	0	0	3	0	0	0	2	0	0	4	0	0	0	0	0	0	0	0	1	0	0	1	1	0	3	0	0	0	0	2	0	0	0	0	0	0	0	0	0	0	4
1427364: Candidatus Thioglobus singularis	3	3	2	11	5	0	18	0	0	16	15	3	21	0	2	1	0	0	0	0	0	0	3	1	4	3	2	0	0	0	0	0	0	0	0	0	0	17	0	0	0	0	0	2	2	0	0	0	52
1704307: Candidatus Xiphinematobacter sp. Idaho Grape	0	0	0	1	1	0	0	0	1	0	0	0	0	0	0	0	0	0	0	0	0	0	0	0	0	0	0	0	0	0	0	0	0	0	0	0	0	2	0	0	0	0	0	0	0	0	0	1	0
1016: Capnocytophaga	295	103	412	391	2431	5	679	5389	1433	269	569	1826	86	1213	2034	1320	1	2864	979	123	518	52	4339	1797	656	1116	1214	781	96	776	510	47	75	270	240	109	1323	261	289	348	79	59	1088	379	732	776	100	1047	121
860228: Capnocytophaga canimorsus Cc5	29	38	24	34	2069	0	119	697	286	43	267	334	22	236	280	503	2	159	381	183	81	20	597	301	118	525	159	78	18	191	62	3	20	132	97	29	217	52	30	37	2	10	1755	142	417	35	20	692	42
45243: Capnocytophaga haemolytica	251	43	334	861	2980	1	536	5150	975	395	836	3204	140	1792	3798	2422	1	3111	3813	135	719	95	8698	1966	1369	608	2936	664	465	1379	1086	165	102	764	1783	423	2472	415	240	427	80	73	1584	1369	1252	430	92	896	155
521097: Capnocytophaga ochracea DSM 7271	137	80	682	523	8450	6	485	8276	1115	244	1137	3343	91	884	2529	1725	1	5501	2987	156	787	55	6229	1782	651	584	361	497	259	1624	447	38	43	380	232	161	1574	206	214	345	47	81	1562	692	665	854	98	622	90
1705617: Capnocytophaga sp. oral taxon 323	268	181	247	319	3927	2	553	3293	2711	351	663	1885	90	818	1527	2220	0	1707	2038	113	420	47	4044	1069	711	1515	1967	611	159	838	344	19	58	450	361	118	1175	273	204	186	155	28	1201	1456	638	353	117	1239	96
246194: Carboxydothermus hydrogenoformans Z-2901	0	0	3	13	4	2	0	1	8	0	1	2	0	13	7	1	3	3	3	2	0	0	2	1	0	6	6	8	2	0	6	0	0	0	2	2	3	5	0	1	0	1	0	0	1	0	0	0	0
186828: Carnobacteriaceae	0	0	0	1	12	1	3	5	0	0	4	2	1	0	0	6	10	1	1	0	4	0	0	0	2	4	2	1	1	1	1	0	0	0	0	0	9	3	0	0	0	0	1	0	1	0	1	0	1
1266845: Carnobacterium inhibens subsp. gilichinskyi	2	6	0	1	29	0	5	19	6	2	47	19	0	8	4	0	2	5	5	0	1	0	5	4	6	6	8	0	1	7	2	0	0	2	1	0	9	1	0	1	2	0	1	7	0	0	0	4	8
1234679: Carnobacterium maltaromaticum LMA28	0	16	5	4	40	3	12	24	15	22	45	15	2	26	59	27	0	1	54	6	1	1	5	2	6	5	0	3	2	1	2	7	1	2	1	0	26	4	0	0	1	0	15	14	5	2	6	4	9
208596: Carnobacterium sp. 17-4	0	8	5	9	18	2	29	28	9	8	72	47	2	4	13	20	0	9	13	14	2	1	38	1	247	10	6	2	1	0	1	9	0	4	10	4	73	11	0	1	7	1	79	14	8	0	0	10	17
1564681: Carnobacterium sp. CP1	1	12	2	10	166	0	5	24	76	3	17	8	6	4	39	20	0	3	6	10	3	2	2	5	2	2	1	4	0	1	0	1	1	12	0	0	17	5	1	1	1	1	0	3	8	11	5	20	6
1437824: Castellaniella defragrans 65Phen	0	1	0	0	1	2	0	0	0	1	0	0	0	0	0	18	0	0	0	3	0	0	5	2	0	0	0	1	0	0	0	0	0	0	0	0	2	1	0	0	0	0	8	0	0	0	0	0	1
479433: Catenulispora acidiphila DSM 44928	1	2	0	1	9	0	0	4	2	1	2	0	1	2	0	2	0	0	1	0	0	0	2	1	0	5	0	1	0	0	0	1	0	6	0	0	0	1	0	0	0	0	0	3	0	1	0	1	3
75: Caulobacter	0	2	0	1	0	0	1	2	1	2	1	0	0	1	0	0	0	0	1	0	0	0	1	2	2	2	7	1	1	0	0	0	0	1	0	1	0	1	0	0	0	0	1	9	0	0	0	0	0
366602: Caulobacter sp. K31	0	0	0	26	13	1	0	0	1	3	0	0	0	0	0	1	28	1	0	0	0	0	1	1	0	0	1	0	1	0	1	0	0	1	0	0	0	1	0	0	0	0	0	1	1	0	0	0	0
76892: Caulobacteraceae	1	0	4	0	0	3	1	3	1	2	1	7	0	0	0	2	0	5	2	1	0	0	3	0	1	4	9	7	0	3	0	0	0	1	1	0	0	1	1	0	0	0	2	12	0	2	1	3	0
158822: Cedecea neteri	0	1	0	0	1	0	0	4	0	0	0	4	0	0	0	1	0	0	1	0	0	0	0	0	4	0	5	0	2	0	0	0	0	0	1	0	0	3	0	0	0	0	1	0	1	0	0	0	0
590998: Cellulomonas fimi ATCC 484	31	3	17	108	155	15	25	19	20	24	28	247	90	44	76	10	2	18	36	4	35	54	35	231	24	38	26	17	11	292	58	48	48	53	14	12	53	24	10	38	2	28	22	32	7	10	55	15	41
446466: Cellulomonas flavigena DSM 20109	3	3	2	9	79	0	6	15	10	6	16	18	4	3	3	6	0	4	4	0	1	2	4	19	8	9	2	2	1	3	2	4	4	3	0	0	7	4	0	6	1	0	0	8	5	5	4	2	56
593907: Cellulomonas gilvus ATCC 13127	16	51	60	25	68	5	20	73	22	18	49	126	36	22	33	50	121	19	288	8	21	25	27	32	27	38	10	11	8	16	7	13	21	7	9	8	25	100	8	11	7	17	16	23	24	44	42	21	43
104264: Cellulophaga	1	0	17	3	2	0	2	7	5	0	2	1	0	2	1	5	0	1	2	0	0	0	13	1	2	23	0	0	4	6	0	0	0	0	0	1	6	2	3	1	0	0	1	5	1	0	0	0	0
688270: Cellulophaga algicola DSM 14237	0	0	0	0	11	0	4	13	5	1	10	8	0	1	19	93	2	0	4	0	27	0	1	5	15	35	0	0	0	0	0	0	0	2	2	0	2	5	0	3	0	0	0	0	6	0	0	5	1
979: Cellulophaga lytica	0	0	0	0	24	0	0	47	6	5	0	28	0	147	31	3	0	19	210	2	10	3	190	31	2	32	7	2	23	27	0	0	6	1	16	26	20	26	0	22	0	0	3	20	3	3	0	6	0
498211: Cellvibrio japonicus Ueda107	0	0	0	0	1	0	10	3	75	0	6	18	12	12	0	1	5	3	0	19	12	0	10	6	3	5	32	80	45	8	19	2	2	0	3	13	22	32	11	0	0	0	51	6	1	1	0	0	5
1945512: Cellvibrio sp. PSBB023	1	7	0	1	1	2	2	7	3	3	6	3	5	21	7	3	1	7	3	3	2	0	2	1	8	1	9	0	0	12	1	1	5	0	4	2	1	5	0	0	1	1	9	2	7	3	1	5	3
1706371: Cellvibrionaceae	1	1	0	0	1	1	1	0	2	0	0	0	1	0	0	4	0	0	0	0	0	0	0	0	0	0	0	0	0	0	0	0	0	1	0	0	2	1	0	0	0	0	0	0	5	0	1	0	2
1706369: Cellvibrionales	1	2	0	1	1	0	0	0	0	0	1	12	0	1	7	0	0	0	0	0	0	0	7	4	0	0	1	0	1	0	0	0	0	0	0	0	0	2	1	0	0	0	1	0	0	0	1	1	13
35718: Chaetomiaceae	1	4	0	1	3	2	3	4	2	0	5	1	0	2	0	2	0	4	3	2	0	0	0	0	4	1	5	1	0	0	0	0	1	0	0	0	2	2	3	0	1	0	4	3	3	1	1	6	3
1173020: Chamaesiphon minutus PCC 6605	2	6	4	7	13	12	11	173	6	11	9	3	1	5	2	15	0	4	2	3	1	1	1	2	2	9	4	3	1	1	0	1	0	0	2	0	7	2	1	1	2	4	4	1	13	2	7	8	1
485918: Chitinophaga pinensis DSM 2588	124	36	218	450	662	1	588	791	172	163	151	993	1120	74	204	191	475	319	615	60	136	84	626	376	736	347	163	39	399	191	48	217	286	124	83	31	470	1474	340	211	24	14	344	146	7	547	5	132	1405
563835: Chitinophagaceae	1	1	2	0	0	0	0	1	1	3	3	0	0	0	1	0	0	1	0	2	0	1	0	0	2	5	2	1	1	0	0	1	0	3	0	1	1	2	1	2	1	1	2	1	0	2	0	1	2
813: Chlamydia trachomatis	0	0	1	0	0	0	0	0	0	0	0	0	0	0	0	0	0	0	0	0	0	0	0	0	0	0	0	0	0	0	0	0	0	0	0	0	0	2	0	0	0	0	0	0	0	0	0	0	0
191412: Chlorobiaceae	0	0	0	0	2	0	0	2	1	0	1	0	0	0	0	1	0	0	7	0	0	0	0	1	1	1	0	0	0	0	0	0	0	0	1	0	0	1	0	0	1	0	0	0	0	0	0	0	3
290315: Chlorobium limicola DSM 245	1	2	0	0	0	0	2	1	2	0	0	2	0	0	0	0	0	1	0	0	0	0	1	0	0	0	1	0	0	1	0	0	0	1	0	0	4	3	4	0	0	0	0	1	0	0	0	2	0
331678: Chlorobium phaeobacteroides BS1	0	0	0	0	1	0	0	0	0	0	0	0	0	0	0	1	1	0	0	0	0	0	0	0	0	0	0	0	0	0	0	0	0	0	0	0	0	2	0	0	0	0	1	0	0	0	0	0	0
326427: Chloroflexus aggregans DSM 9485	0	1	0	0	1	0	1	0	0	0	0	4	4	1	0	0	0	0	0	0	0	0	1	0	1	0	0	0	0	1	0	0	5	0	0	0	0	20	0	0	0	0	0	0	0	0	0	0	0
324602: Chloroflexus aurantiacus J-10-fl	1	4	2	0	6	0	0	3	2	0	0	0	0	0	0	1	0	0	0	0	0	0	0	0	0	0	0	0	0	0	0	0	0	2	0	0	1	1	0	0	0	1	0	1	1	0	1	0	0
1805714: Christensenella massiliensis	5	0	2	5	11	2	30	3	8	7	30	1	3	0	5	6	0	20	4	2	1	1	36	9	62	8	7	1	0	2	0	3	8	0	2	9	3	47	1	4	1	0	3	40	3	1	5	6	15
1499392: Chromobacteriaceae	0	42	2	4	241	0	50	52	193	13	104	3	135	21	0	147	0	20	116	90	129	0	116	32	25	9	37	40	4	5	70	0	4	3	2	0	14	59	0	0	0	0	65	2	87	0	3	11	0
535: Chromobacterium	0	2	10	0	1	1	6	11	1	5	18	0	2	0	0	23	0	4	7	42	0	0	17	1	7	0	9	4	1	1	6	0	0	2	1	1	3	4	0	3	0	0	1	13	2	0	0	23	0
1108595: Chromobacterium vaccinii	0	3	0	0	6	0	1	36	2	2	9	2	2	5	0	3	0	3	27	0	3	1	188	23	2	1	1	5	0	1	5	2	3	2	0	0	11	1	0	0	2	0	115	4	6	0	0	0	0
243365: Chromobacterium violaceum ATCC 12472	0	2	3	0	16	0	3	263	8	6	15	5	0	10	7	31	0	4	8	3	0	0	342	17	4	0	4	1	0	4	0	0	2	2	8	1	18	4	0	0	0	0	8	26	11	4	0	16	0
290398: Chromohalobacter salexigens DSM 3043	0	1	0	0	140	3	2	4	0	0	0	0	2	0	0	0	0	0	1	0	0	1	2	3	0	0	1	0	3	1	1	2	0	0	0	0	7	18	0	0	0	0	0	0	5	0	0	1	0
1118: Chroococcales	0	0	0	0	1	0	1	0	1	0	0	0	0	0	0	1	0	0	0	0	0	0	0	0	0	0	1	0	0	0	0	0	1	0	1	0	0	1	0	1	0	0	0	0	0	0	0	0	0
59732: Chryseobacterium	57	182	78	52	111	2	73	1445	107	172	799	211	43	429	266	303	21	58	176	125	837	20	214	57	136	14	163	63	57	427	132	2	8	26	208	37	239	23	6	10	10	5	40	66	478	20	15	79	348
1685010: Chryseobacterium sp. IHB B 10212	18	14	3	8	40	0	12	256	30	7	49	147	3	34	88	48	2	7	21	4	28	0	25	51	22	0	16	17	29	5	69	0	2	1	51	16	45	3	2	0	1	0	125	36	42	2	3	19	19
1721091: Chryseobacterium sp. IHB B 17019	33	418	47	31	185	1	86	1225	212	243	1003	342	151	751	465	848	5	18	69	63	869	13	122	153	179	5	391	33	209	273	240	1	5	16	231	21	291	32	4	2	5	0	34	137	450	49	9	111	50
878220: Chryseobacterium sp. StRB126	1	34	0	1	12	0	9	92	8	21	42	22	7	23	18	33	0	6	5	6	50	0	3	4	13	2	16	6	4	2	16	0	0	0	9	3	16	1	1	0	1	0	1	2	17	1	0	2	6
1874630: Clavibacter michiganensis subsp. capsici	1	1	3	2	27	0	4	3	4	4	7	17	7	1	0	2	0	2	0	2	0	0	27	0	0	1	3	2	0	0	0	0	0	2	0	0	4	6	4	0	0	2	0	4	4	2	0	3	10
31964: Clavibacter michiganensis subsp. sepedonicus	0	0	0	0	4	0	1	2	2	1	3	1	1	2	0	0	0	0	1	0	1	2	1	4	1	0	0	0	0	12	0	1	1	1	2	1	0	1	0	0	0	0	1	2	0	0	0	0	1
1197717: Cloacibacillus porcorum	0	4	1	1	0	3	0	0	0	1	0	0	2	0	0	1	0	0	1	1	1	0	0	2	0	0	0	1	0	4	0	1	0	1	0	1	3	1	0	1	0	0	0	0	0	0	0	0	4
186801: Clostridia	2	6	12	15	15	18	11	10	46	3	2	11	3	0	11	1	1	7	18	7	27	2	16	6	18	15	10	8	2	1	1	0	4	8	10	6	11	17	4	3	3	3	19	57	2	1	4	6	12
31979: Clostridiaceae	4	3	5	562	53	2	7	31	75	5	229	729	345	47	11	58	2	23	18	1	13	3	37	30	41	11	5	42	38	9	15	128	2	31	0	12	335	556	0	23	3	0	8	8	9	41	3	11	2
186802: Clostridiales	39	102	266	445	606	60	505	261	490	976	264	1786	452	283	1202	324	37	306	91	114	173	71	694	238	512	180	291	130	129	63	144	56	114	98	118	142	211	1271	70	63	39	8	30	678	98	62	44	342	887
1496: Clostridioides difficile	29	33	143	276	90	34	64	27	285	34	51	129	65	10	309	78	277	4	260	45	65	3	100	26	179	267	33	119	39	5	35	21	10	16	3	43	138	319	26	152	58	57	147	150	64	6	37	28	29
272563: Clostridioides difficile 630	0	0	0	0	0	3	0	0	0	2	0	0	2	0	1	1	0	1	0	0	0	0	0	0	0	1	1	0	0	0	0	0	0	0	0	1	0	4	0	0	0	0	1	1	0	0	0	0	30
645462: Clostridioides difficile CD196	0	0	0	0	0	0	30	1	0	1	0	0	0	1	2	0	0	0	0	1	0	0	0	1	0	1	23	0	0	0	2	0	0	0	0	0	0	1	0	0	0	0	8	3	0	0	0	0	1
699037: Clostridioides difficile M68	0	0	0	2	1	0	5	0	0	1	1	1	3	1	2	0	0	2	3	0	0	0	0	0	4	4	1	1	0	0	1	1	0	0	0	1	0	3	0	0	0	0	1	0	0	0	0	0	3
499174: Clostridioides difficile QCD-23m63	0	1	0	0	0	0	0	0	0	0	1	1	0	1	0	0	1	0	1	0	0	0	0	0	0	1	0	2	0	0	0	0	0	0	0	0	0	1	0	0	0	0	0	0	0	0	0	0	0
1485: Clostridium	247	50	47	203	502	27	135	105	174	68	145	117	315	37	66	90	48	66	52	25	36	39	75	118	113	215	38	42	88	206	14	47	86	52	34	17	172	190	125	34	43	26	211	43	28	35	23	138	251
1488: Clostridium acetobutylicum	1	1	0	24	8	1	3	0	0	1	6	1	3	0	1	0	0	1	5	0	0	0	1	0	3	2	0	0	0	0	0	0	0	0	0	0	0	1	0	0	0	0	39	0	0	0	0	3	4
1341692: Clostridium autoethanogenum DSM 10061	0	0	0	1	2	1	0	0	1	0	1	0	1	0	0	0	0	1	0	0	0	0	0	0	0	0	1	0	0	0	0	0	1	1	0	0	0	1	0	1	0	0	0	2	0	0	0	0	1
1520: Clostridium beijerinckii	1	2	6	2	1	0	8	2	3	22	0	7	3	0	3	10	0	3	0	0	3	0	2	10	11	5	4	4	1	1	0	0	8	0	0	3	6	9	0	1	1	0	2	6	0	2	1	6	26
290402: Clostridium beijerinckii NCIMB 8052	0	0	0	0	0	0	0	0	0	0	0	0	0	0	0	0	0	0	0	1	0	0	0	0	0	0	0	0	0	0	0	0	0	0	0	0	2	1	0	0	0	0	0	0	0	0	0	0	0
1428454: Clostridium beijerinckii NRRL B-598	1	0	0	0	0	0	0	0	0	0	0	0	0	0	0	0	0	0	4	0	0	0	0	0	0	0	0	0	0	0	0	0	0	0	0	0	0	1	1	0	0	0	0	0	0	0	0	0	0
1216932: Clostridium bornimense	1	15	7	6	42	1	13	4	26	11	10	17	1	2	6	5	0	6	0	0	1	1	0	2	3	1	0	11	0	2	0	0	6	7	6	0	1	17	0	0	0	0	2	4	1	0	0	0	51
1491: Clostridium botulinum	0	7	7	21	12	62	9	9	16	0	11	6	1	1	13	6	0	4	1	0	2	0	2	5	11	2	2	4	0	0	1	0	1	0	1	19	7	14	0	12	20	0	0	4	2	9	0	23	11
498213: Clostridium botulinum B1 str. Okra	0	0	0	0	0	0	0	0	0	0	0	0	0	0	0	0	0	0	0	0	0	0	0	0	0	0	0	0	0	0	0	0	0	0	0	0	0	1	0	0	0	0	0	0	0	0	0	0	0
929506: Clostridium botulinum BKT015925	1	2	0	1	2	1	2	0	1	0	1	1	2	0	34	0	0	0	0	0	1	0	0	2	0	0	0	0	1	0	0	0	0	0	0	0	3	5	0	0	0	0	305	0	0	0	0	0	1
508767: Clostridium botulinum E3 str. Alaska E43	0	0	0	0	0	0	0	0	0	0	0	0	0	0	0	0	0	0	0	0	0	0	0	0	0	0	0	0	0	0	0	0	0	0	0	0	0	1	0	0	0	0	0	0	0	0	0	0	0
1408284: Clostridium botulinum Prevot_594	1	0	1	3	0	0	1	0	0	1	0	0	0	0	0	0	0	0	0	0	0	0	2	0	0	0	0	0	0	1	0	0	0	0	1	0	0	1	0	0	0	0	0	0	0	0	0	0	0
1492: Clostridium butyricum	0	1	7	0	7	0	1	11	1	17	2	3	2	6	0	1	6	1	1	0	0	3	0	3	0	4	3	1	0	0	0	1	0	0	0	0	2	10	0	4	0	0	1	4	0	0	0	0	15
536227: Clostridium carboxidivorans P7	0	2	3	4	8	0	6	8	2	2	9	3	3	1	2	3	0	0	0	0	1	0	1	2	4	1	3	1	0	0	1	0	0	1	1	0	3	3	0	0	0	0	1	1	2	3	0	4	7
573061: Clostridium cellulovorans 743B	15	81	8	49	485	14	99	26	205	54	36	63	39	6	61	22	5	21	105	3	10	5	42	360	16	5	13	32	7	106	4	14	7	128	7	5	48	17	16	47	2	5	2	16	20	22	16	63	311
1351755: Clostridium chauvoei JF4335	0	0	0	8	4	1	0	0	5	7	2	3	0	0	1	1	0	1	1	0	0	0	2	1	0	5	0	0	2	0	1	0	0	2	0	0	0	2	2	1	0	0	0	1	0	2	1	0	3
1552: Clostridium estertheticum subsp. estertheticum	0	0	0	1	0	0	0	0	2	0	2	0	1	0	1	2	4	1	8	0	1	0	0	0	0	0	0	1	0	1	0	0	0	0	1	2	2	1	0	0	0	3	1	0	0	0	0	1	6
1497: Clostridium formicaceticum	9	13	24	146	92	79	107	8	28	15	21	148	58	8	91	17	17	6	125	24	22	51	11	27	37	14	127	53	20	7	2	142	21	80	54	22	63	662	10	9	2	11	13	20	1	1	4	110	87
1534: Clostridium kluyveri	2	0	3	14	38	0	8	9	11	15	8	18	5	6	4	19	0	4	5	0	0	0	20	5	6	11	5	37	0	0	0	0	1	2	0	0	7	16	0	1	0	0	2	1	4	1	0	11	89
583346: Clostridium kluyveri NBRC 12016	0	0	0	0	2	0	0	0	0	2	1	0	0	0	0	0	0	1	0	0	0	0	0	0	0	2	0	0	0	0	0	0	0	1	0	0	0	1	1	0	0	0	0	0	0	0	0	3	0
642492: Clostridium lentocellum DSM 5427	2	3	9	31	18	1	27	13	27	22	25	85	356	7	20	16	0	11	9	0	3	2	21	33	58	8	21	15	13	3	24	2	41	15	4	4	35	72	4	2	0	5	0	13	3	17	0	34	58
386415: Clostridium novyi NT	3	3	2	11	25	0	11	0	13	5	2	11	7	1	0	0	0	7	0	8	1	0	2	17	8	5	0	1	0	0	0	0	17	4	0	0	11	45	1	2	0	0	2	7	2	0	1	5	42
86416: Clostridium pasteurianum BC1	0	1	0	0	0	0	0	0	0	0	0	0	0	0	0	2	0	0	0	0	0	0	0	0	0	2	1	2	0	0	0	0	0	0	0	0	0	1	0	0	0	0	0	1	0	0	0	3	0
1502: Clostridium perfringens	4	10	5	16	32	0	13	18	26	22	15	17	4	10	5	15	0	2	5	3	6	1	20	7	10	18	40	10	11	6	7	4	2	13	1	3	62	15	1	1	1	5	6	24	26	5	2	11	64
1548: Clostridium scatologenes	0	0	0	2	0	0	1	0	0	0	0	0	1	2	0	0	0	0	0	0	0	0	0	0	0	0	0	0	0	0	0	0	0	0	0	0	1	1	0	0	0	0	0	0	0	0	0	0	4
755731: Clostridium sp. BNL1100	0	0	0	0	6	1	9	2	8	6	4	2	4	0	0	0	3	0	0	0	1	0	1	0	1	1	17	0	1	0	0	0	0	0	0	0	2	4	0	1	0	0	0	3	0	0	0	1	44
641107: Clostridium sp. DL-VIII	0	0	0	0	0	0	0	0	1	0	4	1	0	0	0	5	0	0	0	0	0	0	0	0	0	0	0	1	0	0	0	0	0	0	0	0	0	2	0	0	1	0	0	8	0	0	0	1	0
1042156: Clostridium sp. SY8519	43	57	19	26	148	3	131	172	126	180	229	225	60	63	105	83	4	33	12	14	55	8	54	117	115	30	80	60	5	21	15	8	23	7	5	16	93	189	11	43	17	2	5	25	57	16	9	193	397
394958: Clostridium taeniosporum	7	2	5	8	6	10	8	3	11	7	9	22	2	2	5	0	1	3	0	0	2	1	0	10	3	5	1	4	0	0	1	0	11	1	0	1	2	2	2	3	0	0	0	8	3	1	0	1	83
1513: Clostridium tetani	0	0	0	0	0	0	0	0	1	0	0	1	1	0	0	1	0	0	0	0	0	0	0	0	0	1	1	0	1	0	0	0	0	0	0	0	1	4	0	0	0	0	2	2	0	0	0	0	0
1231072: Clostridium tetani 12124569	1	1	2	8	16	0	17	4	4	7	5	12	6	8	2	1	1	2	4	0	1	2	4	8	6	3	11	1	2	1	14	1	17	1	12	2	10	16	0	5	0	3	6	4	0	3	3	14	6
212717: Clostridium tetani E88	1	1	0	0	0	0	1	1	1	2	0	0	1	0	2	0	0	0	0	1	0	0	1	0	0	5	4	0	0	0	0	0	0	0	0	0	1	1	0	0	0	0	0	4	0	0	0	0	4
1519: Clostridium tyrobutyricum	0	0	0	1	1	4	1	0	2	0	1	0	0	1	0	1	0	0	0	0	2	0	5	0	1	0	1	0	0	0	0	12	0	0	0	0	0	1	2	0	0	0	0	1	0	0	0	1	1
1619308: Cnuibacter physcomitrellae	8	0	5	2	18	0	4	1	3	3	8	12	1	5	0	0	1	4	0	0	2	0	0	10	1	0	4	1	2	1	3	0	5	0	0	0	0	5	0	2	0	2	0	2	6	2	0	3	12
28258: Cobetia marina	0	0	0	0	7	0	5	1	1	0	0	21	0	1	0	38	0	0	1	2	0	0	1	3	0	2	2	0	0	0	0	0	0	0	0	0	0	1	0	0	0	0	1	3	0	1	2	0	0
759273: Colletotrichum higginsianum IMI 349063	2	42	17	21	24	66	104	52	47	126	108	26	46	35	6	98	13	72	39	88	14	13	46	14	46	87	52	102	14	7	8	5	6	4	11	8	11	44	5	2	6	1	78	31	33	26	48	51	38
279113: Collimonas pratensis	1	1	0	2	0	0	1	1	1	0	1	0	0	1	0	5	0	1	0	0	1	0	0	1	1	0	0	1	1	0	0	0	1	4	0	1	0	1	0	0	0	1	1	2	3	1	0	0	0
28228: Colwellia	0	0	0	0	0	0	0	0	0	0	2	1	0	0	0	0	0	1	0	0	0	0	0	0	0	0	0	1	0	0	0	0	0	0	0	8	0	1	0	0	0	0	0	0	0	0	0	2	0
167879: Colwellia psychrerythraea 34H	0	0	0	0	0	0	1	1	0	1	0	1	0	0	0	2	0	0	0	2	0	0	0	0	1	1	1	1	0	0	2	0	0	0	0	0	0	9	0	0	0	0	1	0	0	0	0	0	0
58049: Colwellia sp. MT41	0	0	0	0	1	0	2	2	0	0	1	3	0	2	0	0	0	0	1	1	0	0	1	0	2	0	0	1	0	0	0	0	0	0	1	1	1	2	0	0	0	0	4	1	1	1	0	5	1
80864: Comamonadaceae	24	133	39	46	35	115	129	194	626	102	67	35	60	49	39	78	29	146	154	82	15	24	304	33	51	70	80	58	89	86	62	11	28	148	130	61	268	36	3	38	19	60	130	74	204	5	202	111	34
1458425: Comamonadaceae bacterium A1	0	25	4	1	51	0	30	2	144	6	17	13	79	0	8	483	0	3	44	5	109	0	30	20	0	0	10	26	0	4	4	0	0	3	7	1	229	19	0	0	2	0	75	107	18	7	0	1	0
1458426: Comamonadaceae bacterium B1	0	2	1	4	66	2	1	21	0	0	0	0	0	1	0	9	0	0	9	3	4	0	6	1	1	1	0	0	0	2	0	0	0	0	1	0	6	1	0	0	0	0	3	0	3	0	0	2	0
283: Comamonas	0	1	1	1	2	14	1	2	8	4	4	1	1	0	0	20	0	2	7	1	3	1	2	1	0	2	0	0	0	0	2	0	0	0	0	0	5	5	0	0	0	0	1	0	1	1	2	1	1
225991: Comamonas aquatica	0	2	1	0	0	1	10	23	9	2	0	3	4	1	0	0	0	1	9	2	1	1	52	2	0	2	17	0	1	0	0	1	2	1	5	0	17	3	0	1	1	2	4	1	4	0	1	0	0
225992: Comamonas kerstersii	0	1	0	0	0	1	1	2	0	2	1	0	0	0	0	1	1	1	0	1	0	0	1	0	0	1	5	0	0	0	0	0	0	0	0	0	1	2	0	0	0	0	0	1	0	0	0	1	0
285: Comamonas testosteroni	0	2	0	0	2	1	5	0	0	5	2	1	3	0	0	1	0	1	0	0	0	0	2	0	1	1	0	0	0	0	0	0	1	0	0	1	0	1	0	0	0	0	3	3	2	0	0	3	1
1191062: Comamonas testosteroni P19	0	0	0	0	0	0	0	0	0	0	0	0	0	0	0	0	1	0	0	0	0	0	1	0	0	1	0	0	0	0	0	0	0	0	0	1	0	1	0	0	0	0	1	0	0	0	0	0	0
1392005: Comamonas testosteroni TK102	2	2	1	2	0	1	0	3	4	8	3	1	0	2	3	5	0	8	1	2	0	2	3	2	6	2	5	0	9	6	2	1	0	7	7	2	7	5	4	1	2	0	6	4	5	0	1	3	2
469383: Conexibacter woesei DSM 14684	0	1	12	5	12	1	3	1	5	3	3	3	2	1	3	5	5	1	12	4	0	0	0	5	1	3	1	2	0	0	0	1	2	1	0	0	5	12	0	4	0	0	0	3	0	0	0	7	9
309798: Coprothermobacter proteolyticus DSM 5265	0	3	0	2	20	0	4	2	5	0	3	1	6	0	1	3	0	0	1	0	1	0	0	1	0	4	1	0	0	0	0	0	3	1	0	1	2	3	0	0	0	2	0	0	1	0	1	2	9
583355: Coraliomargarita akajimensis DSM 45221	11	1	2	43	27	1	12	7	160	3	33	21	9	4	23	15	0	10	42	5	8	2	29	49	32	0	7	3	2	264	29	10	21	4	47	2	47	1	1	7	0	0	9	25	1	0	0	13	40
1531429: Coriobacteriaceae bacterium 68-1-3	1	0	5	17	32	2	21	10	17	4	3	11	12	0	6	1	0	8	1	18	1	5	10	2	5	52	6	36	0	1	0	2	1	1	0	0	13	31	2	5	0	0	0	1	0	5	0	1	6
84999: Coriobacteriales	8	2	3	2	4	1	8	0	8	27	2	12	0	1	1	4	4	0	1	1	35	9	31	104	2	33	8	4	0	3	1	0	1	3	0	1	6	1	14	0	6	2	1	0	3	1	3	79	10
84998: Coriobacteriia	19	9	21	45	85	58	15	16	47	17	18	52	44	7	39	28	47	27	181	21	7	2	110	14	16	110	18	40	14	9	33	19	10	12	4	5	94	75	2	40	10	48	5	18	5	4	50	18	25
700015: Coriobacterium glomerans PW2	1	1	6	17	20	8	4	6	16	13	7	17	21	1	17	0	32	4	143	3	1	3	2	0	6	96	3	10	7	0	2	15	2	1	0	1	34	13	1	8	1	12	1	4	4	1	18	6	6
85007: Corynebacteriales	130	36	66	1532	427	10	209	369	440	74	93	726	147	400	135	213	29	209	2082	79	163	4	366	136	334	584	80	197	201	159	43	71	313	369	37	95	494	576	113	92	11	39	468	79	124	231	39	66	768
1716: Corynebacterium	102	177	136	520	909	13	101	2323	572	487	601	1990	295	752	488	678	44	806	2777	215	297	17	2681	339	423	1111	380	265	116	1868	45	114	66	1271	258	610	981	334	120	93	34	121	1087	330	292	519	357	366	226
1431546: Corynebacterium aquilae DSM 44791	2	4	1	9	7	0	3	17	28	5	9	2	3	2	5	0	1	4	5	0	0	0	1	7	13	15	1	0	0	2	0	0	0	1	0	2	0	8	4	20	0	6	0	0	5	4	1	4	16
191610: Corynebacterium atypicum	1	1	2	7	27	0	6	53	12	21	10	54	2	15	7	1	2	7	17	3	10	0	19	7	2	12	0	2	1	20	0	4	1	8	0	2	5	1	0	2	2	1	6	3	5	1	0	11	14
161896: Corynebacterium camporealensis	1	0	0	4	8	0	1	2	9	0	0	5	0	6	2	0	0	20	19	0	1	0	6	0	0	3	0	10	0	1	0	1	1	2	0	0	4	1	1	1	3	1	3	1	2	9	0	2	6
931089: Corynebacterium deserti GIMN1.010	0	3	3	0	21	0	0	8	6	2	1	19	3	9	3	4	0	4	12	0	4	1	6	0	4	14	0	0	0	2	1	0	0	1	1	0	2	25	2	0	0	1	14	0	0	0	0	2	4
1717: Corynebacterium diphtheriae	0	0	8	34	75	2	9	60	16	6	10	36	18	6	24	37	0	8	12	3	10	0	56	10	5	17	5	1	2	49	1	0	5	4	0	8	1	10	3	10	1	2	1	8	8	5	1	17	118
698969: Corynebacterium diphtheriae HC03	0	0	0	1	0	0	0	0	1	0	0	0	4	0	0	0	0	0	1	0	1	0	1	0	0	0	0	0	0	1	0	0	0	0	0	0	0	2	0	0	0	0	0	0	0	0	0	0	0
698970: Corynebacterium diphtheriae HC04	0	0	0	0	11	0	0	1	11	0	0	17	1	27	0	0	0	27	145	0	0	0	44	0	11	34	1	0	6	1	0	0	0	51	1	0	24	10	0	0	0	0	102	1	0	0	0	1	0
558173: Corynebacterium doosanense CAU 212 = DSM 45436	78	20	7	129	40	0	32	16	49	111	24	113	18	25	88	0	0	39	134	51	27	34	34	176	99	20	91	40	34	69	27	27	18	162	146	51	72	110	36	116	4	132	2	45	10	38	107	2	173
1050174: Corynebacterium epidermidicanis	0	0	1	0	10	0	2	2	0	1	0	10	1	6	6	0	0	2	0	3	0	0	6	6	0	5	2	0	0	0	0	1	2	2	0	0	5	2	0	1	0	0	0	3	0	0	0	1	0
1451189: Corynebacterium falsenii DSM 44353	0	0	1	1	4	0	1	5	0	1	4	1	2	2	2	0	1	0	5	0	0	0	6	2	1	2	2	0	0	2	0	0	0	5	0	0	0	1	0	4	0	1	1	1	0	1	1	5	4
1437875: Corynebacterium frankenforstense DSM 45800	2	0	1	8	28	0	9	6	6	14	2	13	1	3	6	0	1	1	8	0	3	0	2	12	0	13	3	5	0	0	0	0	4	0	1	2	2	12	3	6	0	3	0	8	1	1	1	5	10
1718: Corynebacterium glutamicum	4	1	1	29	15	1	3	6	7	9	13	39	13	4	8	14	1	10	29	0	0	3	5	5	13	47	4	3	11	13	0	11	2	27	0	4	15	4	4	4	0	0	8	5	4	2	5	10	37
1223515: Corynebacterium humireducens NBRC 106098 = DSM 45392	1	1	1	0	9	0	2	9	5	4	1	13	4	10	0	1	2	3	4	0	0	0	3	3	1	6	0	1	0	0	6	0	4	0	0	0	2	3	0	3	0	1	0	4	0	3	0	3	33
156978: Corynebacterium imitans	4	11	7	19	10	0	3	87	33	11	43	65	20	27	6	11	2	9	25	5	6	0	46	11	6	29	2	0	0	4	0	1	1	7	3	2	17	3	3	3	0	0	4	42	20	9	4	32	11
306537: Corynebacterium jeikeium K411	9	14	5	109	194	3	21	189	162	25	44	571	43	164	81	53	0	120	33	21	63	15	306	59	105	63	468	36	16	27	7	4	2	274	47	238	44	100	30	16	3	3	16	67	80	16	35	38	102
645127: Corynebacterium kroppenstedtii DSM 44385	1	3	9	1	8	1	0	8	2	0	11	2	1	4	1	3	3	2	4	0	0	0	4	12	0	6	2	3	0	0	0	1	2	5	0	0	1	2	1	1	9	1	16	7	2	4	2	3	23
35755: Corynebacterium kutscheri	11	2	7	36	107	1	13	45	65	15	81	83	11	132	17	28	3	62	50	12	23	0	59	29	40	101	11	35	16	0	0	5	3	24	8	4	65	84	5	17	0	4	19	36	31	130	2	29	44
1408189: Corynebacterium lactis RW2-5	2	0	3	1	2	1	4	2	14	1	7	5	3	6	0	1	0	2	65	0	4	0	0	1	3	8	0	0	0	0	0	0	10	1	0	0	4	4	0	1	0	0	1	4	3	1	1	0	14
1224162: Corynebacterium marinum DSM 44953	1	0	0	1	26	0	3	3	3	3	2	4	1	15	0	2	3	4	3	0	0	0	1	1	3	17	2	1	0	0	0	0	0	0	1	0	1	2	0	2	0	0	2	3	1	0	0	3	3
1224163: Corynebacterium maris DSM 45190	0	0	0	1	18	0	5	4	45	1	2	8	2	0	1	0	0	1	3	0	2	0	4	0	0	158	0	3	0	0	1	0	0	0	0	0	1	1	0	1	0	0	0	2	0	0	0	6	3
571915: Corynebacterium mustelae	80	39	106	1862	622	9	42	595	266	79	150	1372	349	600	151	594	8	322	801	64	126	6	2451	99	485	1884	142	142	855	75	17	175	37	2076	49	259	1180	782	116	130	12	69	796	74	250	293	62	109	29
161895: Corynebacterium phocae	0	1	1	1	17	0	4	3	7	2	2	13	4	2	1	1	0	3	1	2	1	0	0	3	1	1	0	0	0	0	0	1	1	2	0	0	1	4	0	1	0	1	0	6	1	1	0	2	1
1719: Corynebacterium pseudotuberculosis	4	5	14	11	47	0	3	37	43	13	10	51	4	54	6	37	8	30	31	2	6	1	51	10	18	66	0	10	4	5	1	2	0	35	2	13	20	7	3	4	0	2	57	35	16	29	5	12	7
662755: Corynebacterium resistens DSM 45100	11	2	1	7	33	3	13	4	21	7	21	11	19	13	4	4	1	3	20	3	4	0	2	25	2	8	9	2	3	4	4	3	1	1	31	0	1	94	6	6	1	1	1	5	0	8	1	4	34
156976: Corynebacterium riegelii	0	0	1	0	16	0	1	1	3	1	1	4	3	0	1	2	0	0	0	0	0	0	1	0	0	1	0	1	0	0	0	0	2	0	0	0	2	1	0	0	0	0	0	0	1	0	0	0	15
161899: Corynebacterium singulare	0	0	1	0	20	0	4	3	4	2	8	3	3	1	5	3	0	0	1	78	0	1	20	3	0	0	1	0	0	0	9	0	0	0	0	0	1	2	0	0	1	1	5	4	1	1229	0	0	320
1487956: Corynebacterium sp. ATCC 6931	1	5	2	6	12	0	5	6	2	1	7	6	2	1	7	2	0	2	23	1	1	0	3	11	10	5	2	3	5	1	0	3	4	0	0	0	0	9	0	4	0	0	0	5	1	0	4	1	37
702967: Corynebacterium sp. NML98-0116	16	0	2	11	39	1	5	17	106	8	23	27	11	15	13	10	5	11	13	2	6	0	10	72	15	14	3	10	6	7	0	1	13	8	1	2	2	24	22	51	0	2	0	7	0	20	2	4	169
1705: Corynebacterium stationis	0	7	3	0	54	0	9	10	3	1	10	47	8	0	1	0	0	3	5	5	1	0	5	2	3	7	0	0	0	3	0	0	2	6	1	0	8	5	0	0	0	7	0	3	9	2	0	6	9
1200352: Corynebacterium terpenotabidum Y-11	4	1	0	3	14	0	3	16	4	4	16	40	5	0	2	2	0	1	73	0	3	0	18	16	4	5	1	3	2	2	3	10	4	6	7	3	7	20	0	9	0	1	11	3	1	5	0	1	29
65058: Corynebacterium ulcerans	5	0	1	1	12	0	12	0	3	4	4	1	0	5	0	2	0	4	0	0	0	0	26	0	0	1	4	0	1	0	1	0	3	0	0	0	0	2	1	1	0	0	0	1	0	0	0	5	4
43771: Corynebacterium urealyticum	0	0	0	1	6	0	0	0	0	0	4	0	1	1	0	1	1	1	2	0	2	0	0	2	2	0	0	0	0	0	0	0	0	0	0	0	0	3	1	1	0	0	0	0	0	1	0	1	0
504474: Corynebacterium urealyticum DSM 7109	3	0	1	0	9	0	0	2	16	0	2	5	6	3	2	0	0	3	1	2	0	3	4	2	2	5	0	4	0	2	0	0	2	0	0	0	1	6	0	1	0	0	0	1	0	0	0	2	7
1267754: Corynebacterium urealyticum DSM 7111	3	0	1	5	8	0	0	1	3	1	3	1	6	0	1	2	0	0	2	1	4	1	0	2	1	0	1	0	0	0	0	0	1	1	0	0	1	7	3	0	0	0	0	3	2	1	0	2	2
1072256: Corynebacterium uterequi	12	56	25	20	123	1	15	89	31	44	18	83	19	71	4	51	2	62	6	17	3	0	44	12	14	270	29	10	2	6	4	5	2	20	5	4	23	13	19	18	8	9	7	38	32	38	10	36	19
858619: Corynebacterium variabile DSM 44702	6	1	6	11	96	0	12	18	32	10	30	56	1	35	6	1	8	16	16	6	9	0	9	76	19	26	3	4	6	3	0	3	18	9	1	8	10	11	4	7	8	5	7	14	12	5	2	16	34
1224164: Corynebacterium vitaeruminis DSM 20294	14	1	8	8	16	0	4	36	10	8	18	30	7	3	7	3	0	14	38	4	4	0	6	8	5	10	3	4	3	28	5	3	2	4	1	11	7	5	1	1	0	0	40	7	5	2	3	15	10
777: Coxiella burnetii	0	1	0	1	1	0	0	7	1	1	3	0	1	1	4	7	0	2	9	0	0	0	2	2	1	0	2	0	0	0	0	0	0	1	0	0	0	12	0	0	1	1	18	1	7	0	0	1	1
434924: Coxiella burnetii CbuK_Q154	0	2	0	0	0	0	0	0	0	0	0	0	0	0	0	0	0	0	0	0	0	0	0	0	0	0	0	1	0	0	0	0	0	0	0	0	0	1	0	0	0	0	0	0	0	0	0	0	0
1173022: Crinalium epipsammum PCC 9333	2	0	0	0	0	2	0	9	4	4	0	0	0	1	1	1	0	1	1	11	4	3	3	0	0	0	1	2	1	1	0	0	0	1	0	1	0	18	1	0	0	0	1	0	1	11	1	14	13
290339: Cronobacter sakazakii ATCC BAA-894	0	0	0	0	0	0	0	0	0	0	1	0	0	0	0	0	0	0	1	0	0	0	0	0	0	0	0	0	0	0	0	0	0	0	0	0	0	1	0	0	0	0	0	0	0	0	0	0	0
693216: Cronobacter turicensis z3032	0	0	1	0	2	0	0	0	0	1	2	1	0	0	1	0	0	1	0	0	0	0	0	0	1	0	0	0	0	1	0	0	0	0	0	0	3	6	0	0	0	0	0	4	0	0	0	0	2
469378: Cryptobacterium curtum DSM 15641	3	4	4	54	59	16	2	5	5	4	1	10	41	4	5	1	69	0	8	0	1	0	10	8	3	2	1	15	0	2	0	0	14	0	0	0	101	1	15	79	4	13	0	83	0	5	1	3	6
5206: Cryptococcus	103	430	20	158	24	564	76	1217	620	689	447	141	42	481	1271	381	1000	544	117	3602	30	83	840	436	792	1239	577	819	24	24	5	28	40	45	7	177	2079	1521	6	24	454	294	66	1913	498	2195	705	1271	1393
367775: Cryptococcus gattii WM276	16	155	762	441	903	168	858	551	253	217	283	3825	526	403	159	85	6648	164	33	646	284	35	1147	88	412	151	39	370	145	126	117	31	158	175	145	84	2202	3397	551	149	22	13	1331	194	1257	2948	98	200	912
106589: Cupriavidus	0	1	4	1	38	1	21	32	11	3	35	29	21	0	0	478	0	20	247	14	14	0	76	47	6	0	18	23	8	25	19	0	0	18	24	0	115	21	0	0	8	0	111	17	36	3	3	3	1
367825: Cupriavidus sp. USMAA1020	0	0	0	0	0	0	1	0	0	0	1	1	0	0	0	1	0	0	0	1	1	0	0	2	0	0	1	0	0	0	0	0	0	0	0	0	0	1	0	0	0	0	0	1	0	0	0	4	1
2034: Curtobacterium	0	0	1	3	10	0	1	1	10	4	1	1	0	0	5	2	0	1	0	3	0	0	4	10	1	0	2	0	1	0	0	1	4	0	1	0	0	2	1	4	0	1	1	2	3	0	1	0	6
69373: Curtobacterium pusillum	53	0	7	65	93	0	55	61	50	69	39	101	13	19	15	2	0	24	97	23	22	13	50	85	34	11	15	30	27	9	64	23	25	23	76	33	73	62	18	20	0	13	15	23	9	24	37	2	151
1905847: Curtobacterium sp. BH-2-1-1	3	0	0	5	27	1	4	5	3	7	1	4	2	3	1	1	0	1	7	4	0	0	0	3	1	0	2	1	0	0	1	0	0	2	1	0	1	6	3	0	0	0	1	4	2	3	0	2	4
1561023: Curtobacterium sp. MR_MD2014	0	0	0	5	12	1	6	0	10	2	12	12	9	4	1	2	1	1	2	1	3	0	2	1	2	4	2	1	0	2	0	0	3	0	0	0	4	1	1	1	1	17	0	2	1	1	0	2	21
1912216: Cutibacterium	46	6	10	223	69	129	92	160	19	21	215	215	276	218	123	88	7	97	73	24	100	33	130	187	160	426	94	8	26	216	60	147	120	71	65	261	112	187	47	10	18	45	7	39	126	61	16	75	59
1747: Cutibacterium acnes	80	12	14	64	391	8	50	25	172	38	47	91	45	21	21	213	27	20	166	15	10	12	97	164	110	90	21	31	58	33	21	47	19	35	10	7	171	65	49	17	5	2	68	94	23	20	99	27	70
33010: Cutibacterium avidum	7	5	5	2	37	2	5	7	9	8	14	10	7	7	5	8	1	3	6	1	8	0	6	7	8	7	6	4	0	2	2	1	3	1	0	0	4	2	1	2	0	0	8	10	0	2	1	3	17
1170318: Cutibacterium avidum 44067	10	11	16	23	36	0	3	3	36	4	21	101	78	12	3	124	5	4	280	2	1	1	71	43	30	15	4	15	10	3	5	60	6	17	6	10	63	40	5	23	0	0	94	26	2	8	22	15	9
1117: Cyanobacteria	17	17	4	17	32	11	13	40	20	26	45	22	7	14	11	37	3	18	7	28	4	15	22	32	26	21	16	10	14	11	5	3	14	30	29	7	27	87	13	16	4	12	12	15	18	74	25	62	93
755178: Cyanobacterium aponinum PCC 10605	13	0	2	1	0	0	1	106	30	9	468	5	0	1	2	2	0	13	73	0	0	94	57	175	1	0	4	50	0	0	2	114	1602	1	19	1	13	1	0	0	291	0	0	0	0	0	49	0	0
43989: Cyanothece sp. ATCC 51142	0	1	1	0	0	0	0	0	0	0	0	0	0	0	0	0	0	0	0	0	0	0	0	0	0	0	0	0	0	0	0	0	0	0	0	0	0	1	0	1	0	0	0	0	0	1	0	0	2
41431: Cyanothece sp. PCC 8801	1	0	0	10	0	0	0	4	3	0	2	1	0	0	0	6	0	5	0	1	0	0	0	0	1	1	0	0	0	0	0	0	0	0	0	0	9	1	0	0	0	0	0	0	0	0	0	0	0
563798: Cyclobacteriaceae	0	2	1	0	3	0	0	0	1	0	0	3	3	0	2	0	0	0	3	6	0	0	1	0	1	1	1	1	0	1	1	0	6	3	0	0	0	3	0	1	0	0	1	1	0	1	0	2	3
68288: Cyclobacterium	0	0	0	1	0	0	0	0	0	0	0	0	0	0	0	0	0	0	0	0	0	0	0	0	0	0	0	0	0	0	0	0	0	0	0	0	0	1	0	0	0	0	0	0	0	0	0	0	0
320787: Cyclobacterium amurskyense	0	0	6	6	16	1	5	0	8	1	1	5	3	3	1	4	4	0	0	4	0	0	1	1	0	15	1	0	0	2	0	0	0	8	0	3	10	3	0	0	0	0	0	9	0	4	0	0	3
880070: Cyclobacterium marinum DSM 745	0	1	4	15	1	0	6	0	17	14	3	32	8	0	2	3	1	2	0	0	1	0	1	4	4	2	7	3	0	4	0	0	0	0	0	2	14	19	4	1	1	0	0	3	3	1	0	1	29
1198232: Cycloclasticus zancles 78-ME	13	75	27	32	31	1	73	16	70	78	68	11	12	16	6	42	0	13	24	0	51	7	48	32	110	18	19	315	13	1	7	2	8	6	0	15	77	49	0	5	2	0	0	1	0	4	0	32	254
80811: Cystobacterineae	0	0	2	3	0	1	1	2	1	0	0	2	2	0	0	0	6	1	0	2	1	0	2	3	1	3	0	0	0	1	0	1	1	8	0	1	1	1	2	0	0	0	2	1	0	0	0	2	0
269798: Cytophaga hutchinsonii ATCC 33406	0	2	0	2	184	4	1	1	6	3	0	12	1	7	4	2	4	15	0	0	1	0	1	2	1	74	3	8	1	0	2	0	0	0	1	0	4	7	1	10	0	1	0	3	13	0	0	5	28
89373: Cytophagaceae	0	6	1	0	1	0	1	6	3	2	0	0	0	0	1	1	0	1	0	0	0	0	0	0	1	0	0	0	1	1	0	0	0	1	1	0	1	3	1	1	0	1	0	3	0	0	2	1	5
768507: Cytophagales	4	3	5	2	11	11	4	0	6	4	3	12	9	4	17	3	2	5	5	3	3	3	5	5	21	4	1	3	5	17	4	1	5	11	2	1	29	7	5	7	0	1	4	17	4	10	2	7	34
4959: Debaryomyces hansenii	0	0	0	0	0	0	0	0	0	0	0	0	0	0	0	0	0	0	0	0	0	0	0	0	0	0	0	0	0	0	0	0	0	0	0	0	0	1	0	0	0	0	0	0	0	0	0	0	0
284592: Debaryomyces hansenii CBS767	0	0	0	0	1	0	0	0	0	0	0	21	0	0	0	2	12	0	0	0	0	0	9	4	0	1	0	37	15	0	0	0	0	1	0	0	0	68	2	0	5	6	0	2	0	1	0	7	68
766764: Debaryomycetaceae	0	0	0	0	0	1	1	0	1	0	3	0	0	1	0	6	12	5	0	0	0	0	55	0	0	1	0	1	0	0	0	0	0	0	1	0	1	11	4	0	0	1	0	1	0	1	0	1	26
159087: Dechloromonas aromatica RCB	1	1	1	0	1	5	2	5	2	0	3	2	0	4	1	5	3	8	2	1	1	0	4	2	1	0	1	0	0	4	0	0	2	2	0	0	3	2	0	0	0	4	0	3	3	4	3	2	4
640081: Dechlorosoma suillum PS	0	3	1	0	0	0	1	3	1	14	1	3	0	0	0	1	0	1	2	2	0	0	12	1	0	0	1	1	1	0	0	0	0	0	2	0	3	2	0	0	0	0	0	3	2	0	0	0	0
639282: Deferribacter desulfuricans SSM1	1	1	4	2	19	3	7	0	1	4	4	0	0	3	2	1	0	3	7	1	6	0	11	3	14	4	3	0	0	1	0	1	38	2	2	1	4	14	0	2	0	0	0	0	0	2	0	3	12
1335048: Defluviimonas alba	0	0	1	0	3	0	0	0	0	0	0	0	0	0	0	1	0	0	0	0	0	0	0	0	0	0	0	2	0	0	0	0	0	0	0	0	1	1	0	0	0	0	0	1	0	0	0	0	0
1006576: Defluviitoga tunisiensis	0	0	0	0	2	0	0	0	0	0	14	1	1	0	0	0	1	0	0	0	1	0	5	0	0	0	2	0	0	0	0	0	0	0	0	0	0	1	0	0	0	0	0	0	1	0	0	2	5
871738: Dehalobacter restrictus DSM 9455	0	0	1	1	21	0	0	0	2	1	0	0	2	1	0	0	0	2	0	0	0	0	0	1	0	2	0	0	1	0	0	0	5	0	0	0	4	26	0	1	0	0	0	0	0	0	0	1	0
61435: Dehalococcoides mccartyi	1	0	3	2	8	5	1	2	8	4	2	3	2	1	0	0	1	0	0	0	0	0	2	1	8	4	0	0	23	4	0	0	2	27	3	1	2	1	0	0	0	0	0	1	1	0	0	4	32
1298: Deinococcus	6	0	3	2	2	2	1	3	1	9	3	2	0	1	1	0	0	1	0	1	0	0	0	0	1	0	1	1	0	0	0	0	0	0	0	0	0	4	0	0	0	0	0	1	1	1	2	4	2
319795: Deinococcus geothermalis DSM 11300	6	2	8	1	46	0	8	1	32	0	15	28	0	2	0	0	0	7	1	4	5	0	5	25	0	0	1	1	2	1	0	0	0	1	0	0	1	8	0	0	0	0	0	45	1	0	0	0	246
243230: Deinococcus radiodurans R1	5	0	0	1	4	0	25	1	1	29	27	0	8	1	4	0	0	3	0	1	0	2	3	1	2	0	1	1	1	0	3	0	0	0	0	0	1	8	0	0	1	0	0	2	0	2	0	1	39
80865: Delftia	2	11	0	1	2	1	7	6	13	3	3	0	0	0	0	7	1	1	0	1	1	0	2	0	0	1	4	0	1	0	0	0	1	6	0	0	0	2	0	5	1	0	5	0	3	0	7	7	6
28221: Deltaproteobacteria	10	3	6	35	6	4	1	1	36	6	4	3	10	11	18	7	1	37	2	0	4	1	2	10	9	3	9	9	24	3	1	1	1	4	37	0	12	11	10	4	5	1	54	162	6	0	0	5	20
79604: Denitrobacterium detoxificans	2	14	4	18	25	12	10	4	2	7	6	7	13	1	0	1	23	1	23	2	0	0	15	1	9	2	1	0	1	2	0	2	2	2	1	0	14	70	4	28	2	3	2	8	0	2	1	5	4
522772: Denitrovibrio acetiphilus DSM 12809	2	1	0	2	4	0	0	3	3	1	5	13	1	5	6	3	3	0	0	0	0	2	1	0	5	1	3	5	6	1	0	0	0	0	2	1	7	3	0	2	0	0	4	0	1	0	0	1	2
1630135: Dermabacter vaginalis	45	27	274	1831	381	27	131	422	46	52	103	126	133	26	401	16	30	113	363	118	43	72	447	5037	1222	343	567	56	691	304	727	1221	63	578	190	270	990	1667	700	476	106	8	20	452	77	177	168	340	1970
1274: Dermacoccus nishinomiyaensis	1	1	1	10	40	1	13	2	16	30	9	29	5	17	1	1	0	1	3	11	14	3	4	9	0	1	6	16	1	0	16	3	1	0	1	4	1	8	1	6	0	1	7	23	1	2	1	3	52
439235: Desulfatibacillum alkenivorans AK-01	0	0	0	0	2	1	0	0	1	0	0	0	0	0	0	0	1	0	0	0	0	0	0	0	0	0	0	0	0	0	0	0	0	1	0	0	0	2	0	0	0	0	0	0	0	0	0	0	0
36853: Desulfitobacterium	0	4	11	7	17	0	4	2	5	18	17	6	1	4	0	0	0	2	0	1	1	0	12	0	5	0	3	1	0	0	0	0	0	0	0	0	1	2	0	0	0	0	0	6	2	1	1	10	6
756499: Desulfitobacterium dehalogenans ATCC 51507	1	0	0	0	1	0	4	0	0	4	0	1	1	0	0	10	2	2	8	0	0	1	2	3	2	2	0	1	0	0	0	0	0	5	0	0	4	7	2	0	0	0	3	0	0	0	0	1	4
871963: Desulfitobacterium dichloroeliminans LMG P-21439	5	12	4	119	183	0	53	13	132	32	183	45	32	25	22	41	10	2	154	4	4	1	51	39	33	0	5	32	0	1	1	1	0	28	1	1	95	13	0	2	0	0	17	7	25	0	18	22	3
272564: Desulfitobacterium hafniense DCB-2	4	1	8	16	142	0	26	37	7	5	1	44	11	1	4	0	136	2	12	0	1	9	14	6	9	47	1	10	25	12	0	1	5	0	0	0	10	1	2	23	0	9	0	5	1	6	0	3	13
138119: Desulfitobacterium hafniense Y51	0	0	0	0	1	0	1	0	0	0	1	0	1	1	0	0	0	0	0	0	0	0	0	0	0	0	0	0	0	0	0	0	0	0	0	0	0	1	0	0	0	0	0	0	0	0	1	0	2
871968: Desulfitobacterium metallireducens DSM 15288	0	0	0	2	2	0	2	31	0	5	4	1	1	0	0	0	2	0	1	0	1	1	2	2	1	1	0	1	0	0	0	1	0	0	0	0	0	1	0	1	3	0	0	1	0	0	0	0	3
879212: Desulfobacter postgatei 2ac9	0	10	2	0	9	0	1	0	7	0	1	9	4	6	1	2	0	2	0	0	1	0	1	1	5	1	2	2	0	0	0	0	1	0	0	0	0	2	0	0	1	1	0	6	1	0	0	0	10
213119: Desulfobacteraceae	3	0	0	0	0	0	1	0	0	0	0	1	0	2	4	0	0	0	0	1	0	1	1	2	0	0	1	3	0	0	0	1	0	0	0	0	2	1	1	1	0	0	0	1	0	0	0	1	1
177437: Desulfobacterium autotrophicum HRM2	0	0	0	0	0	0	0	1	0	1	0	0	0	0	2	0	0	0	0	0	0	0	0	0	0	27	0	0	2	0	0	0	0	1	0	0	1	11	0	11	0	4	0	2	0	0	1	2	0
651182: Desulfobacula toluolica Tol2	0	0	0	0	0	0	0	0	0	4	0	1	0	0	0	1	0	1	0	1	0	0	0	1	0	0	0	0	0	0	0	0	0	0	0	0	1	2	1	0	0	0	0	0	0	0	2	2	0
577650: Desulfobulbus propionicus DSM 2032	1	5	0	29	8	43	1	0	3	1	0	1	4	0	59	0	0	0	0	0	0	0	0	0	0	1	0	0	0	0	0	0	0	0	0	0	40	11	3	0	2	0	0	1	1	0	1	4	0
1167006: Desulfocapsa sulfexigens DSM 10523	2	2	3	5	0	5	2	1	5	11	4	0	1	2	3	8	1	1	6	4	0	2	1	1	1	26	2	8	0	1	0	0	0	0	0	0	6	1	1	1	0	4	1	5	2	0	3	3	1
897: Desulfococcus multivorans	3	0	0	0	4	1	16	4	7	0	1	6	4	0	1	0	0	0	2	1	2	0	1	1	5	3	0	0	0	0	0	1	0	0	0	0	1	1	0	1	0	0	1	3	0	1	0	1	22
96561: Desulfococcus oleovorans Hxd3	3	5	22	17	17	0	7	13	2	1	7	42	11	0	0	38	0	10	2	6	4	0	13	9	6	0	5	1	2	10	0	7	1	1	2	0	62	1	16	17	5	1	1	25	3	23	0	0	46
706587: Desulfomonile tiedjei DSM 6799	3	1	5	44	120	16	9	134	0	1	0	118	7	174	18	38	1	447	6	12	29	2	0	6	46	93	34	46	21	9	0	0	2	212	23	14	109	24	8	18	0	5	56	12	24	0	88	83	8
79206: Desulfosporosinus	13	1	2	4	18	1	1	5	6	0	7	5	2	0	6	1	0	2	6	1	2	0	0	5	3	2	2	6	3	2	0	0	2	1	1	0	3	1	1	8	1	1	2	5	1	0	2	4	3
646529: Desulfosporosinus acidiphilus SJ4	0	2	1	4	3	0	0	1	0	0	4	12	2	0	1	0	1	1	0	0	3	0	0	2	1	0	0	0	0	0	0	1	3	0	0	0	1	2	4	0	0	0	0	1	0	0	0	3	0
768704: Desulfosporosinus meridiei DSM 13257	1	0	0	6	1	0	3	2	0	0	9	5	0	0	2	2	0	1	0	0	0	0	0	1	4	0	0	0	0	6	0	1	0	0	0	0	3	1	3	1	0	0	0	0	0	7	0	1	2
768706: Desulfosporosinus orientis DSM 765	0	0	1	0	0	0	0	0	0	1	1	0	0	2	0	0	0	12	0	1	0	0	0	1	0	1	1	0	0	0	8	0	0	0	0	0	0	1	0	0	0	0	0	0	0	0	5	1	1
177439: Desulfotalea psychrophila LSv54	0	0	1	3	4	6	0	0	0	2	1	0	2	0	3	1	0	0	2	0	0	0	0	1	1	12	1	0	0	1	0	0	0	0	0	0	28	3	6	0	0	0	0	0	1	0	0	2	0
485916: Desulfotomaculum acetoxidans DSM 771	1	3	11	20	26	1	10	0	13	1	7	15	4	1	16	4	7	10	4	0	29	4	19	7	4	17	4	6	6	0	0	2	1	2	0	1	15	11	0	4	0	0	4	4	6	6	1	18	8
868595: Desulfotomaculum nigrificans CO-1-SRB	1	12	3	20	74	0	6	5	45	14	12	19	4	6	4	3	1	1	1	1	0	0	8	7	4	10	4	13	0	1	0	0	2	5	0	1	11	12	0	4	0	0	0	13	6	2	1	31	15
696281: Desulfotomaculum ruminis DSM 2154	0	1	0	0	10	0	3	1	1	1	4	4	0	1	1	0	0	0	0	4	0	0	4	0	2	0	0	2	0	0	0	0	0	0	0	1	0	3	0	0	0	0	0	2	0	7	0	10	4
872: Desulfovibrio	3	0	3	4	3	1	3	21	6	7	0	0	71	0	1	1	0	6	0	1	8	0	2	1	2	1	3	11	11	0	2	0	0	4	1	0	2	3	1	1	4	2	27	0	1	0	2	4	100
643562: Desulfovibrio aespoeensis Aspo-2	2	3	0	2	2	0	0	0	2	0	0	0	0	0	2	1	0	0	0	0	0	0	2	1	1	0	0	0	0	0	0	0	0	1	0	0	0	1	0	0	0	0	1	0	1	0	0	0	0
690850: Desulfovibrio africanus str. Walvis Bay	1	0	0	3	3	0	0	2	7	1	1	0	2	0	0	1	0	0	0	0	0	0	2	0	1	0	0	1	0	1	0	0	0	0	1	0	1	1	4	0	4	2	1	3	0	0	1	1	2
207559: Desulfovibrio alaskensis G20	0	2	0	0	6	0	1	2	1	2	4	2	2	0	0	19	0	3	7	0	4	0	0	0	0	1	0	0	1	1	0	0	0	0	0	0	5	1	0	0	1	0	0	0	4	0	0	0	0
44742: Desulfovibrio fairfieldensis	0	0	0	0	2	2	3	1	0	0	1	3	15	0	2	2	0	1	0	0	0	1	2	2	0	0	0	0	8	0	0	0	0	0	0	0	1	2	0	0	0	0	2	1	0	0	0	1	6
1322246: Desulfovibrio piezophilus C1TLV30	1	0	0	0	0	0	0	0	2	0	0	0	0	0	0	0	0	0	0	0	7	0	1	0	0	0	0	12	0	0	0	0	0	0	0	0	0	3	0	0	0	0	0	0	0	0	0	0	0
526222: Desulfovibrio salexigens DSM 2638	0	31	11	2	78	0	39	3	51	28	308	0	0	0	0	0	0	1	0	0	0	0	0	0	27	8	0	0	4	0	0	0	0	0	0	0	1	1	0	1	48	1	1	0	0	6	0	93	54
881: Desulfovibrio vulgaris	1	0	0	1	2	0	2	8	0	1	1	2	5	1	0	0	0	0	2	0	5	0	2	1	1	0	0	2	0	0	1	0	0	0	0	1	0	5	1	0	1	0	0	0	1	1	0	0	0
573059: Desulfovibrio vulgaris RCH1	0	1	0	0	0	0	5	8	0	4	2	0	0	6	0	0	0	0	1	0	0	0	1	0	0	0	0	0	0	0	0	0	0	0	0	0	0	2	7	0	1	0	0	1	0	0	0	0	0
883: Desulfovibrio vulgaris str. 'Miyazaki F'	0	0	1	1	10	0	4	0	1	0	1	2	5	0	0	0	0	1	0	0	0	0	0	0	0	2	0	16	1	0	0	0	0	0	0	0	1	1	0	0	0	0	0	0	1	0	1	1	2
213115: Desulfovibrionales	0	0	0	0	0	0	2	2	0	0	1	0	0	1	0	1	1	1	0	0	1	0	1	0	0	0	0	1	0	0	0	0	0	0	0	0	0	1	0	0	2	0	0	0	0	0	0	0	0
694431: Desulfurella acetivorans A63	0	0	1	2	2	7	4	1	2	13	1	1	0	0	0	2	0	0	0	0	0	0	1	0	1	0	0	0	0	0	0	0	0	0	0	0	0	1	0	0	0	0	0	0	0	0	0	1	3
653733: Desulfurispirillum indicum S5	1	4	0	3	16	0	17	3	3	4	2	1	1	1	2	1	5	0	0	2	2	0	0	16	8	1	0	2	0	1	0	0	1	0	0	2	3	1	2	0	0	1	0	1	4	1	0	10	3
868864: Desulfurobacterium thermolithotrophum DSM 11699	0	2	0	2	2	0	0	1	0	1	0	1	1	0	0	0	0	0	0	0	0	0	0	0	0	0	0	0	0	1	0	0	0	0	0	0	0	1	0	0	0	0	0	0	1	0	0	0	1
69541: Desulfuromonadales	0	2	0	7	21	0	17	5	18	21	10	17	10	4	0	13	0	0	8	2	0	2	9	3	49	4	1	0	0	0	0	9	4	4	10	2	22	22	1	1	0	0	0	1	2	6	8	23	57
1823759: Desulfuromonas sp. DDH964	2	0	0	1	2	0	0	0	3	0	3	0	0	12	2	0	0	0	0	0	0	0	0	0	3	1	0	0	0	0	0	0	0	0	0	0	3	8	0	0	0	0	0	0	1	0	0	1	2
1736675: Devosia sp. A16	0	2	1	2	2	0	2	0	0	0	1	1	0	0	0	0	0	0	0	0	0	0	0	4	2	0	0	0	2	0	0	0	0	1	0	0	2	1	0	0	0	0	1	1	0	0	0	0	3
472569: Devriesea agamarum	0	3	1	2	17	2	3	12	4	8	11	8	11	9	5	5	2	3	38	3	2	0	2	10	8	5	3	4	1	6	0	0	2	5	3	3	7	5	0	1	0	8	6	6	7	0	1	3	5
39950: Dialister pneumosintes	12	14	24	280	136	225	27	60	83	11	12	56	44	10	333	122	313	10	52	110	7	8	91	31	43	333	8	204	4	11	26	15	27	7	1	3	144	40	97	35	30	70	101	9	27	60	62	55	80
246195: Dichelobacter nodosus VCS1703A	6	27	13	28	332	4	20	198	102	18	18	109	59	25	27	300	9	22	158	3	2	25	118	16	23	40	24	38	2	3	0	1	2	44	0	4	136	303	2	41	0	0	22	32	138	36	33	67	1
204037: Dickeya	14	8	4	506	284	38	0	2	31	16	72	480	61	0	67	112	0	1690	175	0	26	0	248	111	150	0	160	237	141	1	0	66	3	20	68	246	1982	47	0	0	9	6	307	16	403	0	70	1380	1
1224150: Dickeya paradisiaca NCPPB 2511	0	3	0	0	1	0	0	2	1	4	4	1	0	1	1	10	0	4	1	0	1	0	1	0	1	0	0	2	0	0	0	1	0	0	0	5	3	1	0	0	0	0	4	0	0	0	1	3	1
1224152: Dickeya solani MK16	0	0	0	0	0	0	0	1	0	1	0	1	0	0	0	0	0	0	0	0	0	0	0	0	0	0	0	1	0	0	0	0	0	0	0	0	0	1	0	0	0	0	0	0	0	0	0	0	3
499555: Dietzia timorensis	0	0	2	2	8	2	1	1	2	0	0	7	0	1	0	1	0	0	0	2	1	0	3	6	1	4	4	0	0	0	0	0	0	0	0	0	0	1	2	1	1	0	1	0	0	0	1	1	11
451864: Dikarya	242	4132	3508	101	2653	1923	1486	5854	3085	2386	3128	3435	796	1962	1763	4934	372	1550	238	5079	1712	298	5741	822	4325	17658	3362	2594	996	65	246	466	678	534	326	2918	717	5590	1182	861	174	100	388	4024	267	2079	1703	13750	6335
1300342: Dokdonella koreensis DS-123	0	1	7	0	4	0	1	28	8	4	4	25	2	1	3	14	0	6	15	1	1	0	37	3	6	3	5	2	0	11	0	0	0	1	0	1	13	30	0	2	0	1	35	9	5	8	29	27	0
313590: Dokdonia sp. MED134	30	0	21	5	49	1	13	18	25	3	28	34	0	7	55	26	0	26	40	13	13	0	21	30	17	2	9	3	0	74	8	0	2	1	0	0	2	1	0	0	0	0	0	10	37	0	0	8	1
1168034: Draconibacterium orientale	68	457	2794	460	1347	42	205	2611	928	210	381	3285	338	2516	3193	1228	4406	265	3066	698	404	20	1215	345	885	7201	132	884	525	270	465	15	70	701	1306	775	1494	260	441	1213	45	11	4009	477	1145	4	19	479	467
471854: Dyadobacter fermentans DSM 18053	3	24	5	16	46	0	31	52	38	8	287	89	25	129	89	405	0	9	11	6	58	1	18	15	13	7	17	19	4	1	0	1	0	4	2	1	16	1	1	0	0	0	0	3	14	0	1	33	40
1379159: Dyella jiangningensis	0	1	1	0	0	0	0	0	0	0	1	0	1	0	0	0	0	1	0	1	0	0	0	0	0	0	0	0	1	0	0	0	0	0	0	0	0	1	0	1	0	0	0	0	0	0	0	1	10
926556: Echinicola vietnamensis DSM 17526	2	0	0	1	1	1	3	0	0	1	0	0	1	0	0	0	2	1	0	1	1	0	1	3	2	48	1	0	3	1	0	0	0	1	1	1	5	1	3	5	0	0	0	0	4	1	0	7	0
502558: Eggerthella sp. YY7918	3	0	0	5	0	1	2	0	1	0	2	1	0	0	1	0	9	3	0	0	0	2	1	0	2	0	1	15	4	0	0	8	0	4	0	0	2	1	6	0	0	0	0	0	0	0	1	0	0
1643826: Eggerthellaceae	3	3	2	16	34	14	8	0	10	7	4	5	7	1	5	9	9	0	15	4	0	0	20	4	4	17	1	5	2	1	1	6	3	2	0	0	30	56	6	14	0	3	2	8	0	10	0	4	3
1944646: Eggerthellaceae bacterium Marseille-P3241	0	0	0	0	12	6	4	1	1	0	1	1	1	0	0	0	11	1	0	0	0	0	3	1	0	0	0	2	0	1	0	1	0	0	0	1	1	7	0	0	0	1	5	0	0	0	0	0	0
943: Ehrlichia	0	0	2	0	0	0	0	0	0	0	0	2	0	0	0	0	0	0	4	0	0	0	0	0	0	0	0	0	0	0	0	0	0	0	1	0	0	2	0	0	0	0	0	0	0	0	0	0	0
302409: Ehrlichia ruminantium str. Gardel	0	3	0	0	0	0	0	0	0	0	2	0	0	0	0	2	0	0	0	0	0	0	0	0	1	0	0	0	1	0	0	0	0	0	0	0	21	1	0	0	0	0	0	0	0	2	0	0	0
308865: Elizabethkingia	117	318	85	188	391	0	93	2679	317	178	1362	876	127	886	693	1119	20	322	1289	160	1861	44	856	277	380	60	274	185	119	391	226	3	6	196	411	127	495	70	39	71	8	1	130	182	564	68	49	184	221
1117645: Elizabethkingia anophelis	106	325	82	99	144	0	118	2072	203	417	1180	432	93	668	460	592	28	57	336	148	1466	29	230	77	202	21	352	74	55	340	144	0	2	14	140	28	271	39	6	9	14	0	220	123	490	34	25	179	222
1606016: Elizabethkingia endophytica	1	6	2	12	11	0	28	51	4	2	20	22	0	8	12	45	0	8	10	5	18	12	12	10	7	1	10	15	14	16	10	0	14	4	9	3	8	1	0	2	0	0	15	2	15	0	2	23	2
1756149: Elizabethkingia genomosp. 3	11	9	1	8	7	0	14	103	13	20	78	48	13	37	29	32	0	0	46	0	169	6	21	2	19	0	22	4	5	48	16	0	0	1	27	10	16	2	1	0	0	0	50	25	26	5	7	0	24
1756150: Elizabethkingia genomosp. 4	7	13	0	14	2	0	5	17	14	1	58	36	1	53	12	32	0	1	43	0	2	0	3	0	0	1	4	0	2	12	6	0	0	0	0	0	7	1	0	0	0	0	7	2	26	0	1	7	1
238: Elizabethkingia meningoseptica	3	83	14	14	50	1	8	144	54	8	119	96	6	80	39	116	1	6	3	5	52	1	11	11	9	3	51	15	2	10	7	0	0	0	4	2	29	5	1	0	1	0	7	14	80	1	3	27	46
172045: Elizabethkingia miricola	7	102	2	75	9	0	93	84	8	91	449	22	69	13	22	232	5	15	63	6	82	1	36	16	9	12	167	5	4	140	11	30	0	9	18	4	20	1	0	0	12	0	50	2	24	1	0	5	78
929562: Emticicia oligotrophica DSM 17448	0	2	1	17	1	0	2	0	1	4	4	3	0	7	0	1	1	2	1	1	0	0	6	1	1	1	0	0	1	1	0	1	0	1	1	1	4	2	0	0	0	3	0	4	1	0	0	3	1
12104: Encephalomyocarditis virus	0	0	1	0	0	0	1	0	0	0	0	0	0	3	1	0	0	0	0	0	0	8	24	24	1	0	35	0	1	0	0	0	1	35	26	0	1	3	6	0	0	2	0	0	0	0	0	2	1
547: Enterobacter	0	3	0	0	16	0	0	30	0	6	2	1	0	0	1	7	0	0	0	0	0	0	5	4	1	2	4	9	1	24	0	1	0	0	34	0	0	6	0	0	0	0	39	0	1	0	0	5	0
1333851: Enterobacter cloacae ECNIH3	0	0	0	0	0	0	0	0	1	0	0	0	0	1	0	0	0	0	0	0	0	0	0	0	0	0	0	0	0	0	0	0	0	0	0	0	0	3	0	0	0	0	0	0	0	0	0	0	1
354276: Enterobacter cloacae complex	0	0	0	0	3	0	0	37	0	16	15	0	1	0	0	2	0	0	0	15	0	0	2	0	38	1	1	0	0	5	0	0	0	0	0	0	10	1	0	0	1	0	4	0	0	0	0	5	0
91347: Enterobacterales	0	6	0	14	23	9	10	38	9	17	24	13	9	12	9	50	7	18	22	22	4	12	61	10	8	11	15	65	84	12	1	2	7	41	9	5	26	40	1	6	10	25	41	43	37	32	6	11	45
374840: Enterobacteria phage phiX174 sensu lato	48	44	33	102	139	26	73	126	79	77	85	161	100	91	65	132	11	15	19	9	44	10	49	57	56	30	20	18	94	102	48	88	155	96	63	83	139	181	43	63	45	44	67	43	78	36	36	157	187
543: Enterobacteriaceae	1	8	3	3	2	1	4	22	2	4	0	16	3	20	0	18	1	12	11	7	5	0	24	10	10	7	6	18	4	3	3	2	6	2	4	6	14	137	11	1	0	2	7	6	15	8	4	11	5
81852: Enterococcaceae	23	34	23	145	656	6	51	52	277	39	123	51	6	38	10	83	6	23	26	24	4	0	124	16	19	43	35	34	10	9	4	2	1	17	3	2	72	16	3	6	3	0	13	19	14	16	25	143	11
1350: Enterococcus	66	49	34	87	240	6	44	146	45	43	185	284	9	22	25	459	3	303	51	25	13	7	15	27	38	46	45	12	9	9	12	5	2	8	8	16	86	11	3	4	7	2	56	53	98	1	30	130	36
565655: Enterococcus casseliflavus EC20	1	5	0	13	30	0	3	10	7	1	15	13	0	1	2	3	0	12	5	1	0	0	52	3	1	3	1	1	6	0	0	0	1	2	0	0	22	5	0	2	1	0	3	1	7	85	1	7	12
44008: Enterococcus cecorum	1	21	8	9	21	0	7	73	9	10	11	14	4	16	53	74	0	509	2	43	6	1	18	8	16	24	8	1	1	8	1	2	0	3	2	7	24	9	1	0	2	1	0	15	8	0	15	48	15
53345: Enterococcus durans	0	2	0	12	39	0	0	5	15	2	8	4	7	12	0	5	0	20	0	3	0	0	4	1	0	2	2	7	0	1	0	0	0	0	0	0	4	2	0	0	0	0	4	5	2	0	1	8	8
1351: Enterococcus faecalis	20	106	60	70	372	7	76	650	65	80	253	219	36	120	429	58	7	80	102	70	77	20	277	106	91	42	141	20	16	39	25	29	10	25	23	11	165	15	11	13	8	3	72	101	35	4	16	156	163
1352: Enterococcus faecium	8	17	7	13	56	1	13	43	26	7	14	120	5	18	21	46	8	12	13	3	9	0	23	10	15	14	7	7	2	13	2	0	5	1	5	1	25	10	3	7	2	0	9	10	13	0	1	38	4
1353: Enterococcus gallinarum	0	3	1	10	14	0	1	11	0	8	11	6	4	0	0	2	1	2	1	1	0	1	2	4	5	6	2	2	3	1	2	1	0	2	0	2	11	4	0	1	0	1	1	0	3	1	9	4	1
1354: Enterococcus hirae	0	1	0	0	10	0	0	1	0	2	8	0	1	2	4	0	1	1	1	0	0	0	0	0	0	0	0	0	0	2	3	0	0	0	0	0	0	1	0	0	0	0	2	0	1	0	0	0	1
1300150: Enterococcus mundtii QU 25	22	1	0	4	16	0	20	68	0	12	54	24	5	0	36	8	0	1	81	7	26	0	4	0	6	21	8	0	0	0	0	14	0	0	1	0	1	2	0	0	3	0	0	0	0	0	1	3	27
186328: Entomoplasmatales	0	0	0	0	0	0	0	0	0	0	0	0	0	0	0	0	0	0	0	0	0	0	0	0	0	0	0	0	0	0	0	0	0	0	0	0	0	1	0	0	0	0	0	0	0	0	0	0	0
29547: Epsilonproteobacteria	4	1	1	37	7	0	6	5	4	9	11	14	7	8	2	5	7	5	250	1	2	0	30	5	4	8	1	0	3	8	5	1	43	3	3	2	7	65	1	9	2	0	2	3	11	12	3	3	16
284811: Eremothecium gossypii ATCC 10895	0	18	1	0	4	12	34	10	4	4	34	217	3	1	9	6	37	12	5	7	1	4	262	9	5	6	26	129	302	3	0	1	0	5	0	4	0	10	3	3	113	707	185	13	5	138	47	108	562
634500: Erwinia billingiae Eb661	1	0	0	9	2	0	3	7	2	7	2	10	3	1	5	0	0	0	0	0	0	0	1	0	4	0	0	1	0	0	0	2	1	0	0	0	3	4	0	0	0	2	0	1	0	1	0	0	6
1647: Erysipelothrix	0	0	1	3	8	0	0	0	1	1	2	0	1	1	1	0	0	0	0	0	0	0	0	0	0	2	0	1	0	0	0	0	0	3	0	0	0	1	0	0	0	0	0	0	0	0	0	0	0
1514105: Erysipelothrix larvae	0	0	2	3	8	0	9	13	6	0	6	3	1	6	3	1	0	2	1	0	2	0	10	0	5	1	3	2	2	1	0	0	0	0	3	1	3	5	0	0	2	0	0	2	0	2	2	1	8
1648: Erysipelothrix rhusiopathiae	16	7	7	87	98	0	33	6	41	104	25	66	31	7	14	4	15	4	60	17	19	28	19	92	174	48	45	70	16	12	5	23	99	28	53	14	49	85	26	224	1	3	3	44	1	34	1	18	230
1313290: Erysipelothrix rhusiopathiae SY1027	0	0	17	7	1	0	0	0	1	4	1	2	0	0	0	0	0	12	2	0	1	0	0	1	0	0	0	1	0	0	0	0	0	2	0	0	0	3	0	0	0	0	1	0	0	0	0	0	1
650150: Erysipelothrix rhusiopathiae str. Fujisawa	0	0	3	73	107	0	1	10	17	3	19	5	4	1	1	10	2	2	8	0	0	1	4	2	5	0	1	3	1	0	0	0	5	0	0	0	7	7	3	1	0	0	0	2	1	0	3	4	11
128827: Erysipelotrichaceae	2	1	4	1	7	0	2	0	2	3	6	2	2	1	2	0	1	5	1	4	1	0	0	2	2	1	0	4	0	0	2	0	4	3	0	2	0	10	0	0	0	1	1	4	0	0	0	4	5
562: Escherichia coli	1	2	11	8	4	0	4	11	7	8	5	4	1	2	3	4	2	0	14	1	2	3	10	8	13	3	5	5	0	18	0	0	0	4	1	2	16	17	1	0	5	2	2	12	8	0	0	3	2
663278: Ethanoligenens harbinense YUAN-3	1	1	0	8	7	1	2	3	3	4	1	0	2	7	2	1	0	45	0	1	0	0	0	1	0	0	5	1	0	0	1	0	2	0	0	1	15	4	0	0	0	0	2	0	0	2	0	3	1
186806: Eubacteriaceae	1	0	4	6	5	20	2	0	9	4	1	5	1	2	5	0	2	1	0	5	2	0	2	2	2	0	1	5	0	1	0	1	0	3	0	0	8	4	0	2	0	0	0	15	0	0	0	2	20
1736: Eubacterium limosum	281	148	152	663	377	15	402	176	1163	925	1421	424	223	181	134	300	206	166	377	158	500	258	298	248	1498	589	132	354	233	91	507	87	1279	104	314	5934	877	938	301	1851	47	7	69	118	152	52	10	48	554
903814: Eubacterium limosum KIST612	0	1	0	3	4	0	1	0	0	0	0	6	1	0	0	0	0	1	1	0	0	0	0	0	0	0	0	1	0	0	0	0	0	0	0	0	0	1	0	0	0	1	1	0	0	0	0	2	0
888727: Eubacterium sulci ATCC 35585	252	63	64	805	1261	97	1268	2	1352	859	566	1356	680	80	279	10	35	845	655	57	382	100	381	463	1470	484	789	323	117	49	119	82	250	165	71	129	90	1598	9	24	24	19	114	961	32	3	5	99	6501
33986: Exiguobacterium	2	1	6	7	17	3	5	6	9	3	5	0	2	1	0	5	2	0	5	4	1	0	1	4	5	4	2	4	0	1	1	3	1	0	1	7	6	2	0	1	3	0	1	1	1	4	0	4	5
1087448: Exiguobacterium antarcticum B7	1	0	1	3	5	0	0	1	1	0	0	3	3	0	0	1	0	1	0	0	1	1	2	1	0	1	0	2	0	4	0	2	0	1	0	1	2	1	1	0	0	0	0	2	1	0	0	0	0
360911: Exiguobacterium sp. AT1b	0	3	0	7	22	0	2	5	9	3	8	0	3	2	4	3	0	3	2	1	2	0	2	1	1	0	0	3	0	0	0	0	0	1	0	1	19	2	0	0	1	0	4	0	1	0	3	4	0
1224749: Exiguobacterium sp. ZWU0009	0	0	0	0	0	0	0	1	0	0	0	0	0	0	0	0	0	0	2	0	0	0	0	0	1	0	0	0	0	0	0	0	0	0	0	0	0	1	0	2	0	0	0	0	0	0	0	2	0
1702221: Faecalibaculum rodentium	5	5	11	13	47	3	4	2	10	41	7	23	3	1	5	23	1	3	1	6	5	2	4	19	10	10	4	8	3	0	1	0	8	2	2	3	18	16	6	2	0	1	0	31	2	3	1	7	66
1510155: Falconid herpesvirus 1	44	107	188	166	93	759	36	386	185	100	168	93	46	206	244	200	593	210	367	405	50	44	286	233	402	1246	84	322	135	71	50	136	7	58	25	103	761	238	224	199	239	351	210	202	224	260	159	627	2092
1562970: Fermentimonas caenicola	41	15	51	152	25	14	44	51	55	22	69	58	4	58	57	56	65	75	5	27	16	6	21	42	34	138	160	50	91	7	8	2	5	3	16	15	89	106	5	19	1	2	31	6	66	33	2	35	20
2423: Fervidobacterium islandicum	0	0	1	1	0	0	0	0	0	0	0	0	0	0	0	0	0	0	1	0	2	0	0	0	0	0	0	0	0	1	0	0	0	0	0	0	2	2	1	0	0	0	7	0	0	0	0	0	0
381764: Fervidobacterium nodosum Rt17-B1	0	0	1	5	0	0	0	0	4	0	1	0	0	0	0	0	0	10	1	0	0	0	3	0	1	0	0	0	1	0	0	0	2	2	0	1	1	4	0	0	0	0	0	0	1	0	0	7	4
1166018: Fibrella aestuarina BUZ 2	11	4	5	137	59	4	58	4	91	5	73	89	29	14	58	13	0	14	265	2	6	2	31	30	33	5	17	18	2	205	4	32	13	3	15	1	28	209	0	15	1	1	2	23	2	0	0	6	98
1834519: Fibrella sp. ES10-3-2-2	0	0	4	0	3	0	12	1	1	1	1	17	2	1	2	3	2	1	2	0	0	0	6	0	3	0	0	0	1	3	0	1	0	5	2	2	13	8	0	0	0	0	6	3	0	0	0	0	9
59374: Fibrobacter succinogenes subsp. succinogenes S85	0	2	2	6	34	0	0	1	1	1	0	0	3	2	4	0	4	0	1	3	1	0	1	1	0	3	0	2	0	0	0	0	0	0	0	0	1	1	2	0	1	1	0	1	0	0	0	0	1
1329200: Fictibacillus	0	1	2	12	55	0	2	6	6	5	10	3	3	2	0	1	1	3	17	0	0	0	2	6	0	0	4	12	0	0	0	0	0	2	0	0	11	1	0	1	0	0	0	1	1	0	1	4	1
546269: Filifactor alocis ATCC 35896	18	8	6	57	7	13	126	5	17	158	3	8	3	4	26	4	2	6	10	9	1	0	5	8	5	5	11	9	112	3	2	4	1	6	1	44	10	8	0	0	273	11	10	32	8	1	41	234	30
661478: Fimbriimonas ginsengisoli Gsoil 348	0	4	5	1	26	0	5	4	7	3	10	6	3	2	5	1	1	1	0	0	1	0	0	2	0	3	2	1	1	3	0	0	4	0	0	2	1	3	0	1	0	1	0	0	0	0	2	3	5
1260: Finegoldia magna	0	2	3	6	3	1	4	5	5	3	3	11	0	1	3	6	2	3	3	3	1	0	2	1	1	7	7	2	0	0	1	0	0	0	0	0	1	1	0	0	1	2	17	16	1	0	2	6	3
334413: Finegoldia magna ATCC 29328	3	0	2	41	43	4	17	0	4	38	11	7	4	0	21	2	3	17	0	6	0	0	6	2	0	11	2	39	0	2	1	0	3	2	1	2	110	38	1	8	2	6	0	1	5	6	3	14	55
525282: Finegoldia magna ATCC 53516	1	1	1	5	0	2	3	3	33	2	2	12	5	1	14	1	5	0	24	0	0	2	2	5	26	5	5	2	7	4	5	0	0	2	1	3	18	44	1	4	1	0	5	9	0	0	1	6	3
1239: Firmicutes	322	421	282	4159	2866	335	1628	4217	779	1285	2565	2786	2514	1188	2613	2501	148	1591	3866	524	733	246	3152	863	4014	757	1321	1560	828	573	1434	1022	480	632	1432	997	3245	2907	260	440	261	144	1696	754	414	395	389	2699	9140
1191459: Flammeovirga sp. MY04	1	7	2	27	22	0	4	13	5	9	7	7	3	8	2	7	4	1	10	0	5	1	4	3	6	1	2	9	0	2	0	0	0	1	2	3	9	3	5	5	1	0	3	5	21	0	3	15	4
1257021: Flammeovirgaceae bacterium 311	3	16	0	2	44	2	14	10	27	3	0	13	1	6	0	18	3	3	7	0	0	1	10	2	24	2	1	3	4	7	1	0	1	6	1	1	86	2	1	1	1	1	13	8	5	5	0	21	0
49546: Flavobacteriaceae	3529	6988	5140	3514	5628	29	4613	74203	7308	8411	28796	22788	4280	21251	15415	24979	520	4430	28990	4800	53410	1254	15951	5007	9404	3028	10889	4926	6278	23973	9785	388	465	1728	18840	3834	16878	2279	732	574	512	149	5831	6570	17561	2342	2435	7766	13073
531844: Flavobacteriaceae bacterium 3519-10	9	57	10	1	36	1	39	658	48	48	102	27	10	61	35	110	0	16	11	16	89	5	17	14	18	7	122	26	4	24	8	0	202	4	11	0	34	5	2	90	1	0	17	23	40	3	9	41	25
1150389: Flavobacteriaceae bacterium UJ101	0	1	2	11	5	2	3	26	25	10	29	27	0	4	2	14	0	7	7	0	8	0	10	3	38	3	1	0	1	4	0	0	4	0	1	0	2	15	0	0	0	0	0	20	5	0	0	5	13
200644: Flavobacteriales	17	19	48	237	43	1	115	90	176	62	233	88	55	96	44	356	1	25	61	43	142	14	25	95	367	83	271	33	171	30	37	5	1	10	5	8	1085	62	59	123	22	24	31	30	485	32	16	264	15
237: Flavobacterium	12	22	17	4	101	2	7	9	11	5	11	22	16	13	8	16	51	5	4	20	6	1	31	12	13	83	6	41	23	21	7	4	7	13	16	3	130	26	10	9	13	22	16	23	12	1	3	14	14
1034807: Flavobacterium branchiophilum FL-15	1	3	2	0	10	0	1	3	4	0	9	5	0	0	26	6	1	2	0	0	1	0	6	1	8	0	4	2	1	3	0	0	1	5	3	0	8	3	1	0	2	0	2	4	1	1	0	3	0
996: Flavobacterium columnare	23	304	32	15	346	2	141	2609	169	148	136	116	48	512	359	249	27	52	45	175	199	7	109	41	40	52	44	36	28	45	27	2	4	20	160	11	111	7	8	5	4	1	30	156	655	8	44	141	21
1763534: Flavobacterium crassostreae	2	3	6	0	0	0	0	0	0	0	4	0	0	0	0	0	0	0	0	2	0	0	0	0	0	0	0	0	1	3	0	0	0	6	0	1	3	3	2	4	4	6	0	1	0	2	0	3	0
1492737: Flavobacterium gilvum	1	0	0	0	0	0	1	0	0	1	0	0	0	0	0	0	0	3	1	0	0	0	0	0	0	0	0	0	1	0	0	0	0	0	0	0	5	1	1	0	1	1	0	0	0	0	0	0	0
1094466: Flavobacterium indicum GPTSA100-9 = DSM 17447	7	4	17	16	220	0	3	13	43	3	10	38	1	15	15	35	4	16	116	2	4	0	122	24	5	10	5	21	4	19	34	0	1	15	5	2	141	2	2	3	0	0	29	22	26	4	0	26	1
986: Flavobacterium johnsoniae	0	0	0	0	0	0	0	0	0	0	0	0	0	0	0	2	0	3	0	0	1	0	1	0	0	0	0	0	0	0	0	0	0	0	0	0	0	1	0	0	0	0	0	6	0	1	1	1	0
96345: Flavobacterium psychrophilum	1	9	8	0	5	0	2	12	8	0	7	7	1	1	2	1	2	1	10	1	0	0	1	2	3	4	1	1	12	12	15	11	3	24	3	5	32	20	25	14	10	24	4	2	2	2	1	3	6
1452724: Flavobacterium psychrophilum FPG3	0	0	0	0	0	0	0	0	0	0	0	0	0	0	1	0	0	0	0	0	0	0	1	0	2	0	0	0	0	0	0	0	0	0	0	0	0	1	0	0	0	0	0	0	0	0	0	0	0
402612: Flavobacterium psychrophilum JIP02/86	14	0	0	0	4	0	0	0	1	3	0	0	0	0	0	0	0	0	0	1	0	0	0	0	0	0	1	0	23	2	1	0	0	2	12	0	2	12	1	0	1	1	3	0	0	0	0	0	0
1306519: Flavobacterium sp. PK15	5	28	3	22	43	3	16	4	10	23	6	25	9	1	5	0	22	15	47	18	1	0	14	0	26	7	5	11	6	27	1	3	2	8	3	1	29	75	21	7	9	7	3	8	6	7	0	1	76
292800: Flavonifractor plautii	0	2	0	1	4	0	0	0	3	0	102	2	1	0	6	26	4	3	0	1	0	0	2	1	4	0	0	1	0	0	1	0	1	0	4	1	0	3	1	0	0	0	1	2	2	2	0	5	10
717231: Flexistipes sinusarabici DSM 4947	1	0	1	1	0	1	0	2	0	1	2	4	0	0	1	0	3	0	0	0	2	0	1	0	0	1	1	0	1	0	0	0	1	1	1	0	1	14	0	1	0	0	0	0	0	0	0	0	2
755732: Fluviicola taffensis DSM 16823	4	4	5	16	24	1	1	15	10	0	13	5	0	12	8	43	0	6	1	0	17	2	8	1	2	4	32	1	2	4	3	0	1	26	1	1	12	3	22	0	0	2	2	8	11	0	0	7	15
1347342: Formosa agariphila KMM 3901	2	4	2	2	9	0	4	14	6	1	12	27	2	10	9	13	0	3	14	0	2	1	42	10	10	0	9	2	4	9	0	0	2	20	6	4	8	13	0	0	0	0	2	2	2	6	0	4	4
262: Francisella	1	1	5	1	1	2	0	8	13	1	0	26	0	13	3	0	0	2	2	10	0	0	1	0	0	1	1	6	0	2	0	0	0	0	1	0	8	3	1	0	0	0	3	1	4	0	0	0	5
28110: Francisella philomiragia	0	0	0	0	2	0	0	0	0	0	0	0	0	0	0	0	0	0	0	0	0	0	0	0	0	0	0	0	0	0	0	0	0	0	1	0	0	2	0	0	0	0	0	0	0	0	0	0	0
573569: Francisella sp. TX077308	0	0	0	0	0	0	0	0	0	0	0	0	0	0	0	1	0	0	1	0	0	0	0	0	0	0	0	1	0	0	0	0	0	0	0	0	1	3	0	0	0	0	3	0	0	0	0	0	0
376619: Francisella tularensis subsp. holarctica LVS	0	0	0	0	0	0	0	0	0	0	0	0	0	0	0	0	0	0	0	0	0	0	0	0	0	0	0	0	0	0	0	0	0	0	0	0	0	1	0	0	0	0	0	0	0	0	0	0	0
1854: Frankia	0	0	0	3	2	0	0	0	2	2	0	4	0	18	0	0	0	0	0	0	0	0	708	0	1	4	1	0	0	0	0	0	1	1	0	0	0	2	0	0	0	0	0	1	0	1	0	0	0
298653: Frankia sp. EAN1pec	0	0	1	3	8	0	1	2	2	1	2	1	1	0	0	0	0	0	0	0	0	0	1	1	0	0	1	0	0	0	0	0	2	1	0	1	1	5	0	2	0	2	1	1	0	0	0	0	4
1795630: Frondihabitans sp. PAMC 28766	10	2	3	19	103	0	42	10	16	8	11	13	6	0	0	2	0	0	51	5	5	0	3	42	12	2	4	2	7	6	5	1	24	6	5	2	11	22	6	21	1	4	0	18	1	5	0	4	53
5506: Fusarium	4	15	22	34	41	264	68	97	111	202	395	33	55	68	23	153	31	135	70	116	33	25	135	39	108	154	90	845	68	3	5	3	20	6	15	0	10	44	22	10	4	3	176	30	77	14	116	83	114
229533: Fusarium graminearum PH-1	0	4	1	5	2	8	0	21	11	10	35	1	7	17	2	8	1	21	2	11	0	4	11	3	12	8	13	89	28	0	4	0	1	2	3	2	0	2	1	17	3	1	3	2	2	2	15	2	59
426428: Fusarium oxysporum f. sp. lycopersici 4287	0	5	4	7	4	89	19	8	25	46	77	30	9	37	8	53	6	61	25	48	6	34	21	1	46	112	22	150	5	2	0	0	3	5	2	0	3	4	4	2	0	0	81	4	30	2	32	30	27
334819: Fusarium verticillioides 7600	1	0	15	3	0	5	4	2	2	40	26	3	3	0	0	9	0	4	1	12	2	2	10	0	24	15	22	32	7	0	0	0	0	0	1	0	0	1	0	0	0	0	33	0	3	0	7	2	5
203492: Fusobacteriaceae	24	16	15	45	22	1	139	29	34	65	39	45	19	27	75	11	8	9	123	50	63	11	26	40	85	23	38	43	77	32	16	11	22	14	11	16	149	154	10	10	8	26	47	28	8	58	4	49	108
203491: Fusobacteriales	180	10	267	6820	1351	15	326	146	1661	150	861	9492	17502	544	1393	1490	414	512	703	0	399	56	470	202	3971	44	739	219	2755	78	167	522	3146	459	63	461	1078	11552	163	115	19	7	183	1748	31	244	260	25	6349
848: Fusobacterium	12103	6313	14696	52602	34723	3743	13653	20488	43094	9645	17545	39687	9107	26942	36583	2865	15121	10606	14012	7646	10941	4775	18655	14703	33753	32507	19030	36657	17484	9196	9415	2124	7633	8823	4360	7201	53614	80044	4624	8159	2451	2826	79245	12302	19843	1340	3019	38198	31293
1583098: Fusobacterium hwasookii	937	612	822	6861	2105	20	847	2375	10233	462	1704	5081	534	1481	4552	223	40	699	452	91	612	129	1247	1169	1852	440	3998	6451	479	507	689	56	608	231	280	849	1115	6615	22	127	88	18	461	796	2356	50	34	848	5900
1307442: Fusobacterium hwasookii ChDC F174	119	184	267	949	701	22	159	419	3524	182	620	665	84	530	1430	75	14	229	44	22	232	9	161	73	519	391	280	1223	91	26	89	2	135	243	21	40	2919	2712	8	118	5	22	198	128	377	17	23	676	1142
1307443: Fusobacterium hwasookii ChDC F206	95	193	113	609	650	10	124	342	2488	131	281	506	49	2391	383	80	25	75	61	20	228	20	181	1444	285	232	261	416	99	48	141	3	132	89	51	82	917	1101	17	18	4	2	160	265	1512	1	23	361	747
1307444: Fusobacterium hwasookii ChDC F300	132	278	136	1127	1171	14	326	646	12766	79	277	708	97	1099	1333	94	17	91	89	39	233	36	406	159	232	72	93	1254	111	55	450	16	142	527	90	231	1354	1056	7	38	7	10	187	124	828	4	8	355	1484
851: Fusobacterium nucleatum	3411	2545	2651	8361	6657	1932	2590	5205	7009	2945	4696	7210	2740	8336	18108	680	5828	826	3063	3612	2907	351	5998	2067	5164	7492	1659	9943	2742	3049	1824	320	1682	1292	460	1357	16397	6050	939	982	290	617	25155	1639	4611	251	570	8430	7551
76859: Fusobacterium nucleatum subsp. animalis	354	273	783	712	1249	259	2738	774	1252	934	668	977	1825	1270	3853	243	1277	246	313	1896	969	145	720	418	1689	4688	598	1730	644	75	406	33	165	296	102	368	5536	1341	272	480	158	191	1702	2739	637	135	592	542	1777
469601: Fusobacterium nucleatum subsp. animalis 21_1A	103	59	530	244	408	168	1412	168	2538	510	93	366	488	2509	389	19	430	43	207	2199	304	21	109	255	289	724	83	1182	202	26	233	39	396	39	33	229	5306	438	144	162	77	107	1466	205	91	18	55	135	319
469607: Fusobacterium nucleatum subsp. animalis 4_8	1496	57	2081	5247	954	451	954	2023	5639	308	1457	2978	850	4224	4446	115	374	1330	1817	631	1392	632	1279	2426	7230	584	2445	618	1822	119	1012	179	818	247	307	819	1339	7782	73	631	319	265	563	1139	1630	334	24	209	5149
457405: Fusobacterium nucleatum subsp. animalis 7_1	37	61	140	97	294	38	122	205	199	58	162	159	99	421	592	19	278	26	70	74	55	16	149	52	160	591	572	443	69	16	41	10	37	19	16	66	347	193	27	97	14	17	196	262	66	13	39	208	546
76856: Fusobacterium nucleatum subsp. nucleatum	56	177	46	1439	473	342	95	163	309	36	25	61	21	108	64	6	15	0	11	34	12	17	39	79	29	33	32	306	6	2	10	0	9	5	4	2	423	49	83	16	35	10	781	21	20	1	9	102	1169
190304: Fusobacterium nucleatum subsp. nucleatum ATCC 25586	53	69	108	1439	656	462	136	162	1081	157	244	196	29	249	206	45	105	45	62	237	102	11	101	123	300	140	96	2449	83	2014	773	8	429	219	17	29	6984	2060	113	31	52	11	3855	80	158	14	8	239	1573
1307428: Fusobacterium nucleatum subsp. nucleatum ChDC F316	65	24	48	405	597	253	84	74	1557	66	57	321	141	138	175	42	167	19	17	69	22	5	65	65	82	379	69	335	56	23	22	0	9	25	9	16	1174	328	163	23	57	3	1419	89	122	2	34	147	225
76857: Fusobacterium nucleatum subsp. polymorphum	276	311	452	2562	9181	75	555	1674	12348	276	871	1115	446	1615	1960	128	239	363	529	223	470	61	940	551	889	920	351	4167	551	226	515	153	342	464	214	439	3724	1178	45	404	47	38	1867	458	958	26	109	1758	1899
393480: Fusobacterium nucleatum subsp. polymorphum ATCC 10953	54	28	90	395	141	16	102	180	314	77	125	330	44	217	770	47	115	24	73	47	673	4	434	177	398	253	33	125	175	35	86	83	153	80	34	146	232	572	30	65	5	19	374	58	78	3	14	149	551
155615: Fusobacterium nucleatum subsp. vincentii	31	59	386	69	127	50	194	100	246	51	141	398	80	193	191	2	511	40	33	268	15	57	169	57	168	1436	181	235	90	10	53	11	3	4	13	10	695	44	67	67	3	56	177	74	266	19	87	151	64
469602: Fusobacterium nucleatum subsp. vincentii 3_1_27	150	96	349	292	761	79	428	213	2659	125	260	446	686	429	757	43	625	46	129	707	72	49	274	83	343	1879	216	527	246	29	109	25	81	77	29	63	1720	221	96	158	27	72	1131	104	588	15	37	199	203
469604: Fusobacterium nucleatum subsp. vincentii 3_1_36A2	30	79	203	499	331	99	661	75	312	37	76	367	475	255	293	15	927	39	60	815	39	35	147	93	245	836	102	240	187	26	100	2	44	23	28	63	1217	164	37	83	11	69	404	120	246	2	64	226	123
1005058: Gallibacterium anatis UMN179	0	1	0	1	7	1	2	52	2	2	30	6	10	9	4	97	0	0	1	2	2	0	2	1	7	1	4	4	0	2	1	1	0	0	3	1	3	3	0	0	1	0	3	1	4	0	2	8	2
395494: Gallionella capsiferriformans ES-2	2	8	15	6	0	2	14	12	16	22	6	33	19	7	6	38	0	6	274	2	0	0	41	32	9	3	9	6	3	1	1	5	2	5	5	4	138	79	0	0	0	0	27	28	0	4	3	3	24
1236: Gammaproteobacteria	1566	1961	732	2499	2910	567	2993	9605	843	2707	3485	8753	7617	7214	5756	4938	66	5787	29389	1109	1920	337	5913	10228	1553	1156	6312	2587	1241	2596	3240	4013	1239	1332	6216	5362	14736	16827	51	97	784	125	3276	1643	6583	676	444	4635	2111
2702: Gardnerella vaginalis	0	0	0	63	21	0	6	2	0	6	1	4	8	0	1	3	69	1	0	1	1	0	0	2	0	5	1	3	3	2	4	0	0	2	0	0	4	3	5	5	0	0	0	2	1	3	5	1	5
553190: Gardnerella vaginalis 409-05	0	4	1	0	6	1	0	0	0	2	0	2	0	0	0	0	5	1	0	0	0	0	1	0	0	0	0	0	0	0	0	0	0	0	0	0	0	1	0	1	0	0	0	0	0	0	0	2	4
1785995: Gemella sp. oral taxon 928	15927	29547	21267	69695	181251	376	20618	75929	75643	27058	105173	129850	40045	61710	86956	62509	2052	31082	33215	9950	10433	1262	36828	20328	20953	10863	31804	72353	5959	6139	14163	9872	829	5798	9624	17058	87921	40304	578	4628	21930	345	61209	61696	24019	101	5132	42031	28934
1617448: Geminocystis sp. NIES-3709	0	0	0	2	0	0	1	0	1	0	0	2	1	0	2	0	0	0	0	1	2	0	0	0	2	0	0	0	1	0	0	1	0	0	0	0	4	8	0	0	0	0	1	0	0	0	0	1	9
1630693: Gemmata sp. SH-PL17	5	24	11	5	4	16	10	4	11	79	19	1	0	2	4	24	1	2	3	13	1	14	4	5	2	12	6	11	2	0	0	0	0	5	2	0	13	11	11	2	11	23	7	13	15	1	17	6	6
129337: Geobacillus	6	17	2	7	71	0	17	11	5	0	4	22	9	2	0	1	0	60	1	2	3	0	5	11	5	5	0	6	0	1	0	1	17	1	6	0	17	23	2	11	1	2	1	1	2	3	9	18	3
471223: Geobacillus sp. WCH70	1	1	3	12	9	0	4	0	1	3	36	2	0	8	20	11	4	7	1	2	1	5	5	2	4	0	3	0	0	1	1	0	0	1	0	1	1	5	0	0	0	0	0	0	0	0	0	1	1
129338: Geobacillus subterraneus	0	0	0	1	0	0	0	0	0	0	0	0	0	0	0	0	0	3	0	0	0	0	0	0	0	0	0	0	0	0	0	0	0	0	0	0	2	1	0	0	0	0	0	0	0	1	0	1	0
33941: Geobacillus thermoleovorans	2	3	8	2	143	0	13	241	32	7	10	120	1	59	83	79	0	187	20	5	17	4	294	79	28	12	16	14	39	369	327	1	2	47	41	22	151	2	3	17	2	1	214	17	26	6	2	24	10
1111068: Geobacillus thermoleovorans CCB_US3_UF5	2	2	1	0	9	0	5	4	1	1	6	16	1	1	0	0	0	5	0	0	0	0	1	0	0	2	1	0	0	0	0	0	0	0	0	0	0	1	0	0	0	0	4	3	1	2	0	5	0
28231: Geobacter	1	2	1	3	1	1	0	0	2	0	3	1	2	0	14	2	0	2	0	2	1	0	2	0	2	4	0	1	0	1	0	1	1	0	2	0	12	5	5	1	0	0	0	2	2	0	1	5	1
404380: Geobacter bemidjiensis Bem	0	0	0	0	0	7	4	2	1	1	3	1	4	0	0	28	0	0	41	2	3	0	8	5	1	1	3	1	0	3	0	0	0	0	4	1	2	2	0	0	0	1	6	3	0	0	0	0	0
398767: Geobacter lovleyi SZ	5	0	1	14	0	37	2	1	3	0	0	1	6	0	10	0	14	1	0	0	0	0	0	7	1	0	1	0	1	0	0	0	0	0	0	0	156	5	8	0	0	3	0	0	0	1	1	11	0
269799: Geobacter metallireducens GS-15	0	5	0	0	0	0	0	0	0	0	0	0	0	0	1	0	1	0	0	0	0	0	0	1	0	0	1	0	0	0	1	0	0	0	0	0	0	1	0	0	0	0	0	1	0	0	0	1	1
443143: Geobacter sp. M18	1	0	0	0	2	0	0	1	4	1	2	6	0	0	9	0	0	1	0	1	11	0	0	0	1	2	2	0	0	0	0	0	2	0	1	0	4	1	2	0	1	1	0	1	0	0	0	0	16
351605: Geobacter uraniireducens Rf4	0	0	0	0	1	0	0	3	0	0	0	0	0	0	0	0	0	0	0	1	0	0	2	0	1	0	0	0	0	0	0	0	0	0	0	0	0	1	0	0	0	0	0	0	0	0	0	0	0
526225: Geodermatophilus obscurus DSM 43160	0	0	1	0	5	0	0	4	8	2	0	3	0	0	0	0	0	1	1	0	0	0	0	1	0	3	1	1	0	0	0	0	0	0	0	0	1	1	0	0	0	0	0	2	0	2	0	1	16
1424294: Geosporobacter ferrireducens	6	4	45	31	56	22	146	34	74	40	54	66	13	7	83	7	2	9	4	1	4	1	6	21	48	22	10	37	4	2	0	9	2	0	0	0	31	133	27	6	5	14	11	45	2	8	4	23	291
1183438: Gloeobacter kilaueensis JS1	8	25	4	1	41	0	21	3	29	32	22	60	13	1	10	1	1	1	1	0	1	1	0	12	2	4	3	1	0	0	0	0	1	0	0	0	2	7	6	21	2	0	0	52	0	2	8	37	43
251221: Gloeobacter violaceus PCC 7421	0	1	0	0	2	0	0	1	2	0	2	0	0	0	0	0	0	0	0	0	0	0	0	0	0	2	0	1	0	0	0	0	0	0	0	1	0	1	0	0	0	0	0	0	0	1	0	0	1
1224746: Gluconobacter oxydans H24	0	0	7	2	11	0	1	146	0	0	41	3	0	683	319	8	0	36	0	0	5	0	612	4	47	1	2	2	1	1	1	0	1	0	0	0	11	62	1	113	1	0	2	26	4	31	0	88	8
861360: Glutamicibacter arilaitensis Re117	4	5	0	5	6	0	5	3	2	1	22	4	7	0	1	0	0	1	0	0	2	0	0	2	1	2	3	1	0	1	0	0	1	0	0	0	1	2	0	2	0	1	0	1	2	1	0	1	4
2053: Gordonia	17	15	5	12	189	33	49	138	51	22	74	79	14	9	113	25	0	5	10	0	5	2	8	24	19	18	2	35	1	7	0	0	0	2	1	1	4	11	8	18	3	9	0	8	24	4	1	56	41
1112204: Gordonia polyisoprenivorans VH2	12	2	3	9	82	3	12	47	20	4	15	56	9	12	11	14	2	3	19	0	14	1	4	15	8	2	0	4	3	4	3	2	1	4	0	0	10	22	2	18	0	1	3	3	7	1	7	8	30
337191: Gordonia sp. KTR9	10	1	1	3	26	1	5	19	16	3	5	24	17	35	10	18	4	0	1	1	13	0	3	27	18	0	1	1	4	1	6	2	3	2	0	3	25	23	1	6	1	2	0	8	22	1	0	2	28
1136941: Gordonia sp. QH-11	0	2	2	0	40	0	2	29	11	11	8	50	30	2	2	6	3	0	3	0	1	1	0	3	0	5	0	0	1	0	0	0	3	0	0	0	0	2	1	7	0	0	1	1	0	1	0	3	25
2055: Gordonia terrae	4	5	9	29	6	0	3	6	2	11	21	47	12	1	0	2	0	0	21	0	0	0	17	6	14	2	1	1	0	4	4	46	5	23	3	1	4	3	1	1	0	3	0	3	0	1	0	17	5
657308: Gordonibacter pamelaeae 7-10-1-b	0	0	0	9	3	6	1	1	1	3	0	1	0	0	0	0	1	0	0	0	0	0	0	0	0	1	1	0	0	0	0	0	0	0	0	0	2	1	0	2	0	0	0	2	2	3	0	1	3
1841863: Gordonibacter sp. Marseille-P2775	0	0	2	3	9	0	0	0	2	0	0	1	0	0	0	0	0	0	1	4	0	0	3	1	0	0	0	2	0	0	0	0	0	0	0	0	1	7	0	0	0	0	0	4	0	0	0	0	3
1445510: Gynuella sunshinyii YC6258	0	1	0	0	0	1	0	1	0	37	39	0	0	1	0	0	0	2	0	0	1	0	0	0	0	2	0	3	0	0	0	0	1	0	0	0	5	1	0	0	0	1	0	0	0	4	0	38	3
724: Haemophilus	173	817	205	79	396	31	1071	1259	268	1292	1618	1353	4383	2030	2003	4515	2	204	572	164	3047	264	1208	1293	261	232	689	662	221	68	241	18	93	63	369	377	822	160	0	1	131	0	93	579	848	112	114	432	731
727: Haemophilus influenzae	49	227	123	45	316	16	599	994	115	1415	2294	757	859	434	362	403	0	48	343	312	126	53	472	221	126	119	159	598	27	22	86	88	63	13	289	122	284	127	2	2	154	0	1122	275	609	57	48	315	543
862964: Haemophilus influenzae 10810	5	16	25	0	5	1	15	34	11	15	50	31	33	49	9	13	0	13	184	7	10	2	31	7	0	0	5	43	3	0	4	0	0	0	15	6	21	7	0	0	1	0	6	11	4	2	1	9	17
1295140: Haemophilus influenzae CGSHiCZ412602	2	7	4	3	2	0	10	30	6	693	304	50	67	24	15	10	0	3	18	9	5	0	5	23	13	6	20	11	1	0	9	1	6	1	2	10	3	1	0	0	7	0	8	33	7	7	1	22	2
935897: Haemophilus influenzae F3047	5	4	1	0	6	0	30	249	1	20	128	45	16	9	9	20	0	3	42	21	0	1	15	5	16	4	4	13	1	0	2	2	1	0	10	7	18	1	1	0	1	0	10	11	11	5	4	3	2
1334187: Haemophilus influenzae KR494	22	13	22	8	15	0	38	167	19	88	109	65	68	109	49	92	1	1	52	41	36	11	49	68	10	20	32	36	0	2	18	12	0	3	18	19	26	3	2	0	36	0	58	19	23	7	2	67	33
71421: Haemophilus influenzae Rd KW20	0	0	3	2	0	0	4	43	7	18	4	30	42	4	1	16	0	0	5	17	16	1	35	13	0	2	29	4	1	0	3	0	0	0	14	2	1	6	0	0	1	0	7	2	42	0	1	2	1
862965: Haemophilus parainfluenzae T3T1	926	6652	2083	719	1639	238	6007	13254	1765	5608	7698	10361	9609	10705	4702	11803	4	808	2734	811	3813	316	4429	4037	1064	1434	4303	4719	242	466	754	102	402	199	1554	1193	2358	727	0	25	587	1	346	4185	4998	706	714	4955	4619
557723: Haemophilus parasuis SH0165	0	1	2	0	0	0	1	6	0	2	4	3	1	1	3	1	0	0	0	12	0	2	1	0	1	0	0	0	0	0	0	0	0	0	0	1	0	1	0	0	0	0	0	19	19	0	0	1	1
157239: Haemophilus phage HP2	7	16	2	7	3	0	3	24	13	19	58	22	37	55	11	32	0	1	226	0	7	3	24	8	2	1	6	9	1	3	14	3	3	1	15	7	13	5	0	1	3	0	3	5	5	7	2	5	19
228400: Haemophilus somnus 2336	0	5	14	2	6	0	10	19	10	11	14	3	7	9	1	11	0	12	4	26	10	1	48	2	5	5	1	4	4	1	0	0	0	0	0	1	16	9	0	0	1	0	9	19	8	0	0	17	10
572479: Halanaerobium praevalens DSM 2228	0	0	1	0	1	0	0	1	1	0	2	1	1	0	0	0	0	0	2	0	0	0	0	0	0	0	0	0	0	0	0	0	0	0	0	0	1	1	0	1	0	0	0	1	0	0	0	0	0
930805: Halioglobus japonicus	0	1	11	0	9	0	1	0	0	0	0	6	0	6	1	0	0	2	2	0	0	0	0	1	16	0	0	1	0	0	4	0	0	0	0	3	2	1	0	0	0	0	2	0	1	0	1	0	0
760192: Haliscomenobacter hydrossis DSM 1100	0	1	0	0	2	1	1	2	0	0	0	1	0	1	2	0	0	1	0	0	0	0	2	0	2	0	0	1	0	0	0	0	0	0	0	0	1	11	0	0	0	1	0	2	0	0	0	1	3
51589: Haloarcula hispanica	0	0	0	0	1	0	0	0	0	0	0	0	0	0	0	0	0	0	0	0	0	0	0	0	0	0	1	0	0	0	1	0	0	0	0	0	0	1	0	0	0	0	0	0	0	0	0	0	0
45667: Halobacillus	15	21	20	17	112	0	33	82	66	1	97	48	18	117	144	7	0	5	1	0	0	0	0	0	0	12	0	0	4	0	4	0	1	3	0	2	2	10	4	0	1	0	5	30	18	0	0	0	4
402384: Halobacillus mangrovi	11	6	1	18	7	0	1	4	15	21	18	11	3	9	57	3	0	12	15	0	21	1	28	4	11	3	16	5	52	0	18	4	6	4	7	25	11	20	0	2	0	0	3	1	3	0	5	4	22
862908: Halobacteriovorax marinus SJ	0	6	5	2	12	0	1	2	8	0	3	5	0	1	2	0	1	1	0	1	0	0	2	1	0	0	0	0	0	1	0	0	4	1	0	1	2	1	1	0	0	0	0	2	1	5	0	0	4
748449: Halobacteroides halobius DSM 5150	0	0	0	2	0	0	3	1	1	1	4	1	0	0	3	3	0	0	0	0	0	0	0	0	1	1	0	2	14	0	0	1	3	2	7	0	2	3	0	0	0	0	0	1	0	0	1	0	1
1480675: Halolamina sediminis	0	2	1	0	0	0	1	2	0	0	0	1	0	0	0	0	2	0	1	1	0	0	1	0	0	0	0	0	2	3	1	2	1	3	2	3	0	4	0	0	2	0	0	1	0	0	1	1	0
1962264: Halomonas sp. 'Soap Lake #7'	0	0	0	0	2	0	0	1	1	1	0	1	0	0	1	0	1	1	1	0	0	0	0	0	1	9	0	0	0	0	0	0	0	0	0	0	2	1	0	0	0	0	0	0	1	1	0	0	0
1346287: Halomonas sp. A3H3	1	0	0	8	5	0	9	0	1	1	1	6	4	0	2	2	0	1	2	0	1	0	3	1	2	0	1	4	0	0	1	2	0	0	0	1	6	3	2	1	0	0	0	0	0	4	2	1	5
1033806: Halorhabdus tiamatea SARL4B	0	0	0	0	0	0	0	0	0	0	0	0	0	0	0	0	0	0	1	0	0	0	0	0	0	0	1	0	0	0	0	0	0	0	0	0	0	2	0	0	0	0	0	0	0	0	0	0	0
349124: Halorhodospira halophila SL1	0	2	1	0	3	0	1	3	1	0	0	0	0	0	0	3	0	0	1	0	0	0	1	0	0	0	0	0	0	1	0	0	0	1	1	0	0	7	0	1	0	0	1	3	1	0	0	0	3
555778: Halothiobacillus neapolitanus c2	0	5	0	0	0	0	0	3	3	1	0	2	0	6	1	4	0	1	0	0	0	0	0	0	0	0	4	0	0	0	0	0	0	0	1	1	1	4	0	0	0	0	0	0	1	0	0	0	1
209: Helicobacter	1	3	7	18	4	0	9	2	0	13	13	14	0	14	4	5	0	29	5	0	1	1	12	6	5	0	1	0	0	1	0	0	4	1	3	3	4	25	1	1	0	0	0	2	8	0	0	0	8
382638: Helicobacter acinonychis str. Sheeba	0	0	0	0	2	0	0	0	0	0	0	0	0	0	0	0	0	0	0	0	0	0	0	0	0	0	0	0	0	0	0	0	0	0	0	0	0	2	0	0	0	0	0	0	0	0	0	0	0
537970: Helicobacter canadensis MIT 98-5491	261	0	11	3567	727	86	1132	0	16	8	452	103	24	60	37	14	233	4	7800	17	0	0	7968	1419	13	351	17	191	55	204	4	222	2410	20	5	201	131	16580	3	59	1	32	136	12	27	37	0	27	1
537971: Helicobacter cinaedi CCUG 18818 = ATCC BAA-847	0	0	0	9	0	0	16	2	0	0	0	0	0	0	0	0	0	0	0	0	0	0	9	6	0	0	0	0	0	0	0	0	14	0	0	0	0	109	0	0	0	0	0	0	0	0	0	0	0
1172562: Helicobacter cinaedi PAGU611	2	0	0	1	0	2	7	0	0	0	1	0	0	0	0	0	0	1	2	0	0	0	1	3	0	0	0	0	0	0	0	0	2	0	0	0	0	14	0	0	0	0	0	0	0	0	0	0	0
235279: Helicobacter hepaticus ATCC 51449	0	0	0	31	6	0	8	0	0	1	0	0	0	0	0	0	0	0	0	0	0	0	12	0	0	0	0	3	0	0	0	0	4	0	0	1	0	5	0	0	0	0	0	0	0	0	0	0	0
1591088: Helicobacter himalayensis	0	0	0	2	2	0	0	0	0	0	0	0	0	0	0	0	0	2	0	0	0	0	0	0	0	0	0	0	0	0	0	0	0	0	0	0	0	1	0	0	0	0	0	0	0	0	0	0	0
679897: Helicobacter mustelae 12198	2	0	0	121	10	0	24	0	0	0	9	0	0	0	0	0	0	0	186	0	0	0	137	54	0	0	0	1	0	2	0	10	29	0	0	3	0	260	0	0	0	0	0	0	0	0	0	0	1
210: Helicobacter pylori	0	1	1	6	1	5	3	29	1	0	8	1	9	3	17	0	1	1	4	0	18	2	4	1	8	1	0	5	9	0	0	7	3	0	3	13	21	10	1	0	4	3	1	1	1	0	0	3	14
585538: Helicobacter pylori 83	0	0	0	0	0	0	0	0	0	0	0	0	0	0	0	0	0	0	0	0	0	0	0	0	0	0	0	0	0	0	0	0	0	0	0	0	0	1	0	0	0	0	0	0	0	0	0	0	0
1321940: Helicobacter pylori UM066	0	0	0	0	0	0	0	0	0	0	0	0	0	0	0	0	0	0	0	0	0	0	0	0	0	0	0	0	0	0	0	0	0	0	0	0	0	1	0	0	0	0	0	0	0	0	0	0	0
1382927: Helicobacter pylori oki898	0	0	0	0	0	0	0	0	1	0	0	0	0	0	0	0	0	0	0	0	0	0	0	0	0	0	0	0	0	0	0	0	0	0	0	0	0	1	0	0	0	0	0	0	0	0	0	0	0
222136: Helicobacter sp. MIT 01-6242	0	0	0	0	0	0	1	0	1	1	0	2	0	0	2	0	0	0	1	0	0	0	4	0	0	0	1	0	0	0	0	0	0	0	0	0	0	3	0	0	0	0	0	0	0	0	0	0	6
76936: Helicobacter typhlonius	0	0	0	3	1	0	0	0	2	0	0	3	1	0	0	0	0	3	0	0	0	0	0	0	0	0	0	0	0	0	0	0	0	0	0	0	0	1	0	0	0	0	0	0	0	0	1	7	0
498761: Heliobacterium modesticaldum Ice1	8	9	22	8	2258	1	64	124	40	121	123	524	37	16	61	36	0	2	1	4	10	2	9	7	20	12	137	35	0	2	0	0	5	2	0	2	8	42	0	5	1	0	11	6	1	4	13	11	6
1262470: Herbaspirillum hiltneri N3	0	0	2	0	0	0	1	0	3	1	3	4	1	0	0	8	0	0	7	0	0	0	0	0	0	0	0	0	0	0	0	0	0	0	0	0	3	5	0	0	0	0	3	4	1	1	0	1	0
1078773: Herbaspirillum rubrisubalbicans M1	0	4	0	0	0	0	1	5	0	4	1	1	1	1	0	17	0	0	1	0	0	1	5	2	0	0	3	0	0	0	0	0	0	0	2	0	0	1	0	0	0	0	8	3	0	0	0	3	0
964: Herbaspirillum seropedicae	0	1	0	1	2	0	3	1	6	1	13	4	1	1	0	13	0	0	1	9	1	4	4	10	2	0	2	3	0	2	0	3	1	0	5	0	0	3	0	0	0	0	1	6	12	0	1	3	3
757424: Herbaspirillum seropedicae SmR1	0	0	1	0	0	0	0	6	4	0	0	1	0	1	0	3	0	2	11	0	0	0	1	3	1	0	0	3	0	0	0	0	0	0	0	0	2	3	0	1	0	0	3	4	1	1	0	0	0
760142: Hippea maritima DSM 10411	0	1	0	5	2	0	1	0	2	1	2	2	0	2	1	0	2	2	0	3	0	0	0	1	1	0	11	0	0	0	0	0	0	0	0	1	0	2	0	0	1	0	0	1	0	0	1	2	7
582402: Hirschia baltica ATCC 49814	0	0	0	1	8	0	2	0	2	1	0	0	1	0	0	1	0	0	0	0	0	0	2	2	5	2	1	0	0	1	0	0	0	0	0	0	0	3	1	0	1	0	0	0	0	0	0	0	7
731: Histophilus somni	0	0	1	0	5	0	5	14	1	11	8	18	16	5	0	122	0	0	6	42	29	1	40	4	4	0	10	0	1	5	0	0	1	0	1	0	23	9	0	0	2	0	0	5	14	0	0	1	5
443218: Hoyosella subflava DQS3-9A1	0	3	4	0	19	0	0	4	5	2	1	23	5	16	0	0	13	9	6	3	1	0	1	10	0	6	1	1	0	3	0	1	1	5	0	0	3	3	1	0	0	0	2	13	6	0	1	0	5
166122: Human endogenous retrovirus K113	0	0	1	0	0	3	1	0	0	0	1	0	0	0	0	2	0	1	1	0	0	0	0	1	0	3	2	0	0	0	0	0	0	0	0	0	1	1	0	0	0	0	0	1	2	0	0	0	0
47420: Hydrogenophaga	0	1	2	0	0	1	0	1	0	0	2	0	0	1	0	2	0	1	1	0	0	0	0	0	1	2	2	1	1	1	1	0	0	0	1	1	0	1	0	0	1	0	1	1	1	0	0	1	0
795665: Hydrogenophaga sp. PBC	1	8	3	0	20	2	12	11	1	4	2	0	10	0	0	4	0	32	2	7	5	1	8	2	0	1	6	5	0	0	1	1	0	3	1	0	38	10	1	0	1	0	4	9	5	0	2	5	0
1842537: Hydrogenophaga sp. RAC07	0	0	0	0	0	0	0	2	0	0	2	0	2	1	0	0	0	3	0	0	1	0	0	0	0	0	1	2	1	0	0	0	0	0	0	0	0	1	0	0	0	0	0	3	1	0	0	0	0
89966: Hymenobacter	1	0	0	4	3	3	5	57	2	2	3	0	1	2	1	1	0	1	0	0	2	0	0	4	1	5	2	0	0	1	0	1	1	0	0	0	0	1	0	0	0	0	1	0	1	0	3	3	0
1356852: Hymenobacter sp. APR13	0	0	0	1	2	0	1	0	1	0	0	2	1	0	0	0	0	0	0	0	0	0	0	0	1	0	0	0	0	0	1	0	0	0	0	0	0	1	1	0	0	0	0	1	1	0	0	0	3
1227739: Hymenobacter swuensis DY53	21	2	9	12	27	0	45	3	17	14	38	7	18	2	11	18	0	2	53	2	8	0	26	4	35	2	10	23	0	4	3	1	3	3	1	0	4	7	0	5	1	0	1	4	9	0	0	23	33
1853232: Hymenobacteraceae	2	0	0	0	0	3	24	0	0	0	2	0	7	0	40	0	1	1	41	1	2	1	2	1	0	0	2	3	0	28	0	0	2	0	0	0	3	8	3	1	0	0	0	0	0	0	0	20	3
45401: Hyphomicrobiaceae	0	0	0	0	1	1	0	0	0	0	1	0	0	0	0	0	0	0	0	0	0	0	0	0	0	0	0	0	0	0	0	0	0	0	0	0	0	1	0	0	0	0	0	0	0	0	0	1	0
53399: Hyphomicrobium denitrificans	0	0	0	6	2	0	0	0	0	1	0	5	0	0	0	0	0	0	0	0	0	0	0	0	0	0	1	0	0	0	0	0	1	0	0	0	0	2	0	0	0	0	0	0	0	0	0	0	0
1029756: Hyphomicrobium nitrativorans NL23	0	0	0	1	1	0	1	0	0	0	0	0	1	0	0	0	0	0	4	0	1	0	2	0	1	0	0	0	0	0	0	0	0	0	0	0	0	1	1	0	0	0	0	0	0	0	1	0	1
228405: Hyphomonas neptunium ATCC 15444	0	1	0	0	0	0	1	0	3	0	1	1	0	0	1	4	0	0	0	2	0	0	1	1	0	6	1	2	1	0	1	0	0	6	0	1	2	2	0	3	3	0	0	3	0	0	0	1	0
1906738: Hyphomonas sp. Mor2	0	0	1	5	0	0	3	0	0	3	0	3	1	0	1	0	0	0	0	0	0	1	0	1	1	0	0	0	0	2	0	0	0	1	0	0	0	1	0	0	0	0	0	0	0	1	0	0	0
222543: Hypocreomycetidae	3	49	24	75	42	105	71	77	128	223	279	36	45	92	25	86	29	161	65	140	27	48	319	31	201	154	103	279	32	18	11	0	17	17	16	2	6	84	9	9	5	12	249	51	112	24	69	71	381
1298881: Idiomarinaceae bacterium HL-53	0	0	0	0	2	0	0	5	3	18	48	2	5	0	4	2	1	0	0	0	0	0	3	9	0	0	2	8	0	0	1	0	0	1	13	0	0	1	0	0	2	0	0	2	0	0	1	0	4
945713: Ignavibacterium album JCM 16511	0	1	0	0	4	0	0	0	1	1	0	0	1	0	0	0	0	0	5	0	0	0	0	0	1	2	0	0	0	0	0	1	0	0	0	0	0	1	0	1	0	0	0	0	0	0	0	0	0
1313172: Ilumatobacter coccineus YM16-304	0	1	5	0	2	1	0	1	1	1	5	1	1	1	0	0	0	0	2	0	0	0	0	0	0	0	1	3	0	1	0	2	3	2	0	0	1	2	1	0	1	0	0	2	1	0	0	0	0
572544: Ilyobacter polytropus DSM 2926	5	7	6	42	31	1	10	14	28	6	11	8	0	17	41	5	1	6	5	4	13	4	25	27	25	2	6	7	6	5	4	0	37	14	6	4	15	55	4	8	0	1	3	13	20	2	1	23	29
1810504: Immundisolibacter cernigliae	0	1	0	0	3	0	2	7	7	3	5	14	5	0	1	8	0	1	14	2	1	0	4	2	0	0	0	0	0	0	0	0	0	0	0	0	7	2	0	2	0	0	3	8	0	0	0	2	0
1297617: Intestinimonas butyriciproducens	1	3	1	0	7	0	4	0	5	0	0	17	0	12	5	4	1	1	2	0	1	0	2	0	1	0	4	1	2	2	3	0	0	0	1	0	2	3	0	0	1	1	4	4	4	0	0	3	7
710696: Intrasporangium calvum DSM 43043	2	2	2	0	66	3	4	11	5	4	7	7	12	3	4	4	0	2	16	1	4	0	20	17	4	3	2	4	0	6	1	3	2	2	3	3	2	5	1	2	1	6	11	10	7	2	2	5	24
1300344: Isoptericola dokdonensis DS-3	20	0	12	18	78	4	27	45	22	15	19	54	42	4	9	11	3	11	20	7	20	1	13	37	9	42	28	14	7	5	11	57	6	8	4	7	34	56	12	25	2	2	1	58	6	6	8	15	63
743718: Isoptericola variabilis 225	2	4	2	6	19	0	10	6	10	6	9	7	3	0	2	10	0	13	6	6	0	0	11	4	2	23	2	2	0	1	0	4	3	3	1	0	4	2	1	2	0	0	6	8	4	11	0	6	17
575540: Isosphaera pallida ATCC 43644	1	4	0	1	0	0	6	3	0	3	1	0	1	1	0	0	0	2	0	3	0	0	1	1	0	0	1	3	3	1	0	0	0	2	1	0	2	3	0	1	1	1	3	5	0	1	2	2	0
1763524: Isosphaeraceae	0	4	0	1	0	0	2	5	0	7	1	0	0	1	0	0	1	7	1	0	0	0	0	0	0	5	6	4	0	1	0	0	0	0	0	0	6	1	0	0	1	0	1	6	4	0	3	0	1
103817: Janibacter terrae	0	2	0	5	22	0	3	5	10	3	5	6	1	4	1	2	2	3	6	13	1	1	1	6	0	9	3	1	0	17	1	5	2	4	10	3	0	2	0	2	2	15	0	3	6	0	2	4	13
29580: Janthinobacterium	0	10	0	4	0	9	0	5	1	10	1	0	1	0	4	9	2	12	3	20	0	7	2	9	0	0	7	0	2	1	0	1	1	3	5	0	2	1	0	2	0	0	7	134	0	0	2	4	8
1236179: Janthinobacterium sp. B9-8	3	2	3	2	3	2	4	4	4	6	5	5	3	2	0	5	0	1	0	0	0	0	21	3	4	3	0	1	2	0	0	0	0	0	2	1	5	2	1	0	4	1	13	2	1	0	3	2	4
1906741: Jeongeupia sp. USM3	1	0	10	11	160	31	18	554	17	4	6	81	14	112	30	75	0	20	481	15	19	2	72	29	26	3	5	43	12	29	45	16	10	58	75	43	219	703	2	6	8	0	14	13	24	5	3	331	16
708126: Jeotgalibaca dankookensis	0	5	8	6	102	0	16	16	5	18	23	10	3	2	16	29	0	7	2	11	3	0	10	3	2	19	2	7	1	2	0	1	2	5	1	0	24	6	0	4	1	0	6	5	3	0	1	37	14
1903686: Jeotgalibaca sp. PTS2502	8	36	21	15	222	2	49	165	98	46	149	80	9	52	49	72	2	16	2	8	4	0	2	11	10	28	13	8	0	11	2	1	3	2	4	0	16	2	1	1	1	0	4	35	8	3	5	49	68
1508404: Jeotgalibacillus malaysiensis	10	29	102	86	205	17	8	30	55	29	94	68	81	17	52	7	277	7	30	46	1	30	473	339	21	41	7	44	8	25	84	65	7	112	18	23	68	9	0	87	2	0	13	7	13	9	19	113	42
1461582: Jeotgalicoccus saudimassiliensis	32	9	5	311	125	0	13	12	116	10	22	14	72	11	16	15	0	10	34	2	5	1	6	20	9	16	7	14	25	7	1	0	0	24	2	3	40	4	0	1	1	0	7	6	5	0	2	6	16
419479: Jiangella alkaliphila	1	0	1	4	7	0	7	3	1	11	2	5	7	2	6	3	2	0	3	0	0	0	5	9	1	0	1	2	4	2	0	0	0	4	1	2	1	6	0	1	0	0	1	0	4	3	0	1	15
471856: Jonesia denitrificans DSM 20603	227	11	48	613	286	4	130	96	817	378	285	408	59	191	371	21	2	83	132	67	36	35	256	326	206	177	319	66	33	113	60	76	158	118	38	107	86	312	191	1732	23	296	84	578	45	119	68	8	704
914150: Kangiella geojedonensis	0	1	0	2	1	0	2	3	0	1	0	7	0	3	0	1	0	1	1	0	0	0	0	2	2	0	1	2	0	5	0	0	0	0	0	0	2	2	0	0	0	0	3	0	0	0	0	0	0
1144748: Kangiella sediminilitoris	0	2	0	0	1	0	2	0	0	0	0	0	0	0	0	0	0	0	1	0	0	0	0	1	0	0	0	0	0	0	0	0	0	0	0	0	0	1	0	0	0	0	0	0	0	1	0	0	0
1071382: Kazachstania africana CBS 2517	1	1	2	1	6	42	15	11	4	49	8	77	13	11	6	50	13	65	1	32	3	1	141	109	22	37	31	130	563	1	0	0	0	0	0	1	0	15	3	0	147	26	103	0	2	3	117	4	119
92945: Ketogulonicigenium vulgare	0	0	0	0	0	0	0	1	0	0	1	0	0	0	3	2	0	0	0	0	0	0	0	1	0	2	1	0	0	0	0	0	0	1	1	0	0	5	0	0	0	1	0	1	0	0	0	0	0
860235: Kibdelosporangium phytohabitans	0	0	0	1	13	0	4	2	0	0	1	2	0	3	1	1	0	2	0	0	0	0	2	0	1	3	1	2	0	0	1	1	0	0	0	2	1	1	2	0	0	0	0	0	0	6	0	2	10
266940: Kineococcus radiotolerans SRS30216 = ATCC BAA-149	84	1	22	103	558	1	68	76	514	59	207	341	64	7	64	11	0	41	153	18	66	13	40	220	247	10	158	10	3	10	29	28	111	30	41	20	67	147	86	319	2	4	1	206	8	73	29	39	766
504: Kingella kingae	79	100	70	223	1843	185	1034	4590	4299	157	305	476	87	728	58	218	0	87	460	9	972	17	583	78	145	15	181	161	9	267	4126	29	1036	75	505	356	7090	3874	9	38	409	5	210	226	2991	38	163	270	83
1307763: Kiritimatiella glycovorans	3	1	1	2	6	0	0	0	1	1	0	0	0	0	0	0	0	1	0	0	0	0	0	1	0	0	2	2	0	2	0	0	0	0	0	0	1	1	1	0	0	0	1	0	0	0	0	1	0
452652: Kitasatospora setae KM-6054	0	0	2	0	12	0	2	4	30	4	5	3	3	3	4	0	0	0	1	0	0	0	0	4	1	3	3	0	1	1	0	0	0	1	0	0	0	7	2	3	0	0	0	3	0	0	1	3	12
570: Klebsiella	0	0	0	0	0	0	0	4	0	0	2	2	0	1	3	1	0	0	0	0	0	0	0	1	0	1	0	0	0	0	0	0	0	0	0	0	0	1	0	0	0	0	1	0	1	0	0	1	10
1134687: Klebsiella michiganensis	0	4	0	0	2	0	0	6	0	3	5	0	0	0	0	0	0	0	0	2	1	0	0	1	3	0	1	1	0	4	0	0	0	0	1	0	0	1	0	0	0	0	4	0	16	0	0	0	0
573: Klebsiella pneumoniae	0	2	3	0	6	0	0	2	6	1	0	1	0	0	1	1	0	0	0	0	1	0	1	1	6	1	0	0	0	0	0	0	2	0	0	0	0	1	0	0	1	0	6	5	1	0	0	1	10
72407: Klebsiella pneumoniae subsp. pneumoniae	2	7	2	5	22	8	13	4	11	17	8	10	8	0	2	23	2	2	16	8	0	2	12	10	4	28	21	37	0	2	0	3	0	4	0	2	6	4	2	2	4	4	6	8	8	2	0	21	21
284590: Kluyveromyces lactis NRRL Y-1140	0	0	1	0	0	0	0	0	1	0	1	7	2	0	0	1	33	2	1	0	0	0	4	4	0	2	0	5	42	0	0	0	0	1	0	0	0	1	3	0	15	9	0	0	1	6	6	1	88
57493: Kocuria	20	51	39	230	439	4	243	799	17	142	1336	476	439	32	39	110	292	1	2659	97	152	78	185	498	238	70	126	17	21	661	38	127	13	284	65	479	133	255	123	3	61	474	3	24	31	191	18	1317	62
446860: Kocuria flava	13	2	16	22	71	101	10	34	23	11	52	51	23	62	31	66	16	9	78	8	8	14	12	77	19	46	100	15	2	60	5	13	14	13	15	21	11	7	3	10	1	20	83	17	8	9	8	31	57
71999: Kocuria palustris	43	5	48	192	210	20	68	98	115	25	185	127	46	41	31	30	21	23	468	78	62	10	35	56	48	65	59	34	4	66	10	9	34	48	16	56	108	113	11	9	7	84	26	39	46	31	7	55	64
378753: Kocuria rhizophila DC2201	8	24	8	53	169	21	36	124	97	105	144	98	99	186	81	202	27	165	241	31	19	6	35	275	44	1045	86	14	5	101	28	20	13	35	12	23	49	194	11	2	0	30	26	23	50	37	16	125	91
388357: Kocuria turfanensis	23	34	135	39	977	15	299	488	34	46	124	76	267	44	165	32	6	122	732	10	122	9	223	152	188	67	35	9	25	59	74	12	46	7	9	23	20	273	51	11	2	5	9	223	21	31	13	42	123
153496: Kozakia baliensis	0	0	0	0	0	0	0	0	0	0	0	0	0	0	0	0	0	0	0	0	0	0	0	0	0	0	0	0	0	0	0	0	0	0	0	0	0	1	0	0	0	0	0	0	0	0	0	0	0
479435: Kribbella flavida DSM 17836	5	7	2	8	5	0	2	3	14	5	0	2	2	3	1	1	0	0	0	0	0	0	0	5	5	2	1	2	0	1	0	0	0	1	0	0	1	1	0	1	0	0	4	3	0	3	3	0	4
1750719: Kurthia sp. 11kri321	1	2	3	24	13	0	9	16	157	4	94	7	4	4	7	17	0	1	0	0	1	0	10	7	11	10	3	6	1	1	0	1	0	3	1	0	17	2	0	6	10	0	3	3	7	2	0	12	20
1449976: Kutzneria albida DSM 43870	1	0	0	0	12	1	2	1	0	2	8	3	8	1	1	2	0	1	1	1	11	0	1	16	2	1	1	0	0	1	0	0	1	3	0	0	1	1	1	3	1	1	0	2	1	1	0	12	5
562970: Kyrpidia tusciae DSM 2912	1	1	1	4	19	1	0	1	9	0	2	0	0	0	0	1	5	0	0	0	0	0	0	1	1	1	0	1	0	0	0	0	2	3	0	0	3	1	0	1	0	1	2	0	1	0	0	1	0
478801: Kytococcus sedentarius DSM 20547	1	2	0	0	11	0	2	6	11	5	3	6	2	5	2	7	0	3	4	2	2	0	12	11	3	4	2	10	1	0	1	2	1	0	0	3	1	2	0	4	1	1	1	2	4	3	0	14	25
1506553: Lachnoclostridium	2	0	8	6	4	0	2	19	34	24	7	41	6	21	31	7	0	16	6	0	7	0	15	10	18	2	14	7	2	11	1	0	10	2	0	4	3	26	0	1	2	1	0	32	1	39	0	15	21
1871021: Lachnoclostridium phocaeense	9	12	5	17	105	1	39	9	34	63	71	39	50	15	72	13	0	14	99	5	6	1	20	17	56	23	45	58	5	10	27	1	8	14	4	2	22	111	10	6	5	0	3	18	0	8	0	18	101
357809: Lachnoclostridium phytofermentans ISDg	17	5	0	76	107	0	118	21	44	88	97	75	43	6	53	19	0	21	24	5	8	6	17	20	59	5	103	15	14	3	14	0	12	19	22	7	14	101	22	3	3	0	1	19	4	18	6	68	237
1834196: Lachnoclostridium sp. YL32	61	40	39	158	361	4	413	80	246	459	312	373	724	48	123	128	3	103	120	13	107	43	178	227	724	25	333	343	64	29	88	13	235	111	52	45	252	805	55	72	46	1	12	140	15	70	12	228	1319
186803: Lachnospiraceae	95	63	74	446	550	19	2171	227	386	407	445	738	742	267	598	179	3	230	620	31	559	57	842	627	1659	95	314	152	138	58	159	122	515	180	578	104	381	2638	68	144	32	14	5	223	37	169	34	189	1458
33958: Lactobacillaceae	6	22	25	24	2279	3	84	119	27	108	154	141	60	22	6	12	2003	8	42	3	43	20	28	133	56	124	17	183	5	13	50	89	3	92	48	95	321	19	109	36	32	43	6	46	7	1707	61	94	81
186826: Lactobacillales	737	4597	1105	1268	8228	122	709	3981	4307	1044	1677	7007	2753	2348	605	939	5137	1472	974	565	1113	446	911	5294	1969	1274	427	249	517	686	873	1967	825	10009	439	487	2132	2151	2401	630	384	2063	182	1898	305	16588	1306	1053	3366
1578: Lactobacillus	51	269	90	749	1906	24	125	613	5704	295	315	482	522	47	37	210	7297	77	46	37	28	34	255	316	330	2476	97	452	25	119	36	848	40	117	6	15	492	294	3607	449	374	188	28	316	318	35554	90	322	517
1600: Lactobacillus acetotolerans	2	18	0	1	55	0	10	7	22	1	0	3	10	1	0	1	5	1	2	0	1	0	0	0	2	2	1	0	0	0	0	0	2	3	0	0	3	3	2	0	9	0	0	1	3	28	0	3	16
89059: Lactobacillus acidipiscis	6	0	0	2	10	0	2	3	2	0	2	4	4	0	0	2	3	0	0	0	0	0	0	1	5	3	0	0	0	0	0	0	0	3	1	0	5	4	0	1	0	0	0	0	0	2798	0	6	1
272621: Lactobacillus acidophilus NCFM	0	1	0	2	1	0	0	0	0	7	7	0	0	0	0	0	62	0	1	0	0	0	0	0	0	0	0	0	0	0	0	0	0	0	0	0	0	1	1	15	11	0	0	10	3	988	14	0	5
1423721: Lactobacillus amylophilus DSM 20533 = JCM 1125	10	3	1	53	178	0	9	7	69	18	44	5	6	9	3	7	14	8	19	0	0	0	16	4	6	2	6	10	3	1	0	1	0	5	1	0	40	2	1	3	1	0	12	6	7	9	9	19	0
1604: Lactobacillus amylovorus	0	1	0	0	2	0	1	2	1	1	1	0	1	0	3	1	8	0	0	0	0	0	1	1	0	2	1	0	0	2	0	0	0	0	0	0	0	3	1	6	1	0	1	0	1	358	0	2	0
375175: Lactobacillus backii	3	7	8	3	40	0	3	18	11	9	12	10	3	6	7	2	84	4	0	0	0	1	1	6	3	27	5	2	0	1	0	5	2	6	1	0	2	3	11	0	4	0	2	4	4	74	0	8	13
1001583: Lactobacillus brevis KB290	0	4	4	0	22	0	5	3	0	0	1	0	3	0	0	5	1	1	0	0	1	0	0	0	2	6	0	3	0	0	0	5	1	0	0	0	1	2	8	0	0	1	4	0	0	2	3	2	27
998820: Lactobacillus casei BD-II	0	2	0	0	0	0	0	0	0	0	0	0	0	0	0	0	2	0	0	0	0	0	0	0	0	1	8	1	0	0	0	0	0	0	0	0	0	1	0	1	0	0	0	0	0	0	0	0	0
655183: Lactobacillus casei group	0	0	2	0	0	0	0	2	0	3	0	0	1	0	0	0	208	2	0	1	0	0	1	0	1	3	0	15	0	0	0	0	0	0	0	0	0	2	4	0	0	0	0	0	0	147	1	1	5
28038: Lactobacillus curvatus	1	6	0	23	53	0	3	10	47	6	24	11	9	3	6	1	3	1	3	1	0	1	4	3	1	2	0	4	0	0	0	0	0	7	1	0	31	1	0	1	0	0	4	55	3	4	6	4	2
1584: Lactobacillus delbrueckii	8	11	3	70	156	1	9	8	37	10	51	30	4	15	40	11	22	44	19	1	1	2	22	6	6	7	6	8	2	2	0	7	0	10	0	0	40	14	4	3	2	0	37	1	4	54	13	19	15
353496: Lactobacillus delbrueckii subsp. bulgaricus 2038	0	0	0	1	1	0	0	1	1	0	0	0	0	0	0	0	0	0	0	0	0	0	0	0	0	0	0	0	0	0	0	0	0	0	0	0	1	1	0	0	0	0	0	0	0	0	0	1	0
29397: Lactobacillus delbrueckii subsp. lactis	0	0	0	0	4	0	0	0	0	0	0	1	0	0	0	0	0	0	0	0	0	0	0	0	0	0	0	0	0	0	0	0	0	0	0	0	0	1	0	0	0	0	0	0	1	2	0	0	0
1613: Lactobacillus fermentum	0	92	9	5	42	1	3	477	5	101	12	26	32	0	1	2	5115	6	6	4	0	31	1	1	6	80	2	300	5	0	0	348	11	0	0	2	39	3	1111	43	120	831	0	30	2	60343	130	7	214
324831: Lactobacillus gasseri ATCC 33323 = JCM 1131	0	17	0	0	4	1	0	188	0	0	0	0	16	0	0	0	537	3	0	0	0	0	0	0	0	374	0	0	0	0	1	9	0	0	0	0	0	2	105	1	14	0	1	2	0	140	0	2	195
1007676: Lactobacillus ginsenosidimutans	2	0	2	7	11	0	1	2	4	2	1	18	2	2	1	1	0	0	3	1	3	0	1	0	1	1	1	2	0	1	0	0	0	2	0	0	9	3	1	0	0	0	0	3	1	71	2	2	1
1587: Lactobacillus helveticus	29	53	16	874	2038	0	170	98	526	141	336	148	131	23	6	95	94	57	185	2	14	12	66	101	94	35	65	119	15	3	2	15	1	106	1	1	333	24	2	34	13	1	17	37	55	838	114	92	61
326425: Lactobacillus helveticus CNRZ32	0	0	0	1	17	0	0	4	0	1	0	3	0	0	0	0	0	0	0	0	0	0	1	4	1	0	0	0	0	1	0	0	0	1	0	0	0	2	6	15	1	0	0	0	0	15	2	1	1
405566: Lactobacillus helveticus DPC 4571	0	5	0	0	1	0	0	0	0	0	0	2	0	0	0	0	1	0	0	0	0	0	17	4	1	0	0	0	0	2	0	0	0	0	0	0	1	1	0	0	0	0	0	2	0	1	1	0	1
767462: Lactobacillus helveticus H10	0	0	1	64	26	0	1	0	13	11	8	13	0	8	19	6	4	5	90	0	1	5	74	11	11	1	2	20	2	2	0	0	0	26	0	6	114	2	1	2	0	0	4	5	0	58	4	4	0
880633: Lactobacillus helveticus R0052	0	1	1	1	3	0	1	1	2	0	0	2	1	0	0	0	6	1	0	0	1	0	0	1	0	6	1	0	0	0	0	0	1	3	0	0	2	1	0	0	7	1	0	0	0	32	3	2	3
1291742: Lactobacillus hokkaidonensis JCM 18461	3	0	3	21	15	0	2	4	11	2	6	14	1	2	7	7	2	0	0	0	3	0	1	0	0	6	3	1	0	1	0	0	1	2	0	0	1	1	5	0	2	0	0	2	1	109	2	2	2
109790: Lactobacillus jensenii	4	18	0	16	71	1	4	11	17	0	8	6	1	0	0	4	2	2	0	0	3	0	1	1	2	2	4	5	0	0	0	2	0	0	0	0	9	3	0	0	0	0	0	0	3	2	6	1	2
525329: Lactobacillus jensenii JV-V16	0	1	1	1	11	1	1	0	2	2	2	4	0	0	1	0	0	0	0	0	0	0	0	0	0	0	0	0	0	0	0	21	0	3	0	0	4	8	0	0	0	0	0	0	0	3	0	0	3
33959: Lactobacillus johnsonii	0	2	3	17	59	1	2	73	47	1	7	1	14	1	4	2	263	0	1	0	0	0	0	0	0	124	0	0	0	0	0	6	2	0	0	0	22	4	97	2	0	0	1	0	0	190	0	0	26
1033837: Lactobacillus kefiranofaciens ZW3	0	1	0	1	7	0	1	1	2	5	14	2	2	1	0	0	3	0	0	0	1	0	2	0	0	0	0	1	0	0	0	0	0	1	0	0	2	2	1	4	16	1	0	0	0	68	8	0	2
148814: Lactobacillus kunkeei	1	9	0	9	17	1	2	3	14	14	4	6	1	0	0	3	0	1	0	0	1	0	0	0	0	4	1	0	0	0	0	4	0	1	1	0	1	1	0	1	0	1	1	1	4	6	1	2	0
53444: Lactobacillus lindneri	0	6	7	9	6	0	20	1	4	29	4	1	1	0	4	2	6	5	0	1	0	0	3	1	3	8	4	4	0	7	0	1	1	0	1	1	5	3	4	3	0	0	10	4	0	97	0	5	40
1130798: Lactobacillus mucosae LM1	0	27	0	2	178	0	1	4	1	0	0	3	42	0	13	1	13	6	0	0	0	1	1	0	0	17	0	0	7	1	0	0	1	3	0	0	3	6	1	2	2	0	0	12	2	119	0	2	2
240427: Lactobacillus paracollinoides	0	1	1	1387	782	0	15	3	17	4	53	0	333	0	1	28	41	1	11	1	0	15	1	0	1	6	0	1	1	1	3	1	0	0	0	0	0	1	19	0	9	2	3	2	8	133	0	0	1
1136177: Lactobacillus pentosus KCA1	0	0	0	0	0	0	0	0	0	0	0	0	0	0	0	0	1	0	0	0	0	1	0	0	0	0	0	0	0	0	0	0	0	0	0	0	0	1	0	0	0	0	0	1	0	0	0	0	0
1590: Lactobacillus plantarum	3	1	5	2	28	7	8	16	5	11	27	23	4	8	14	10	407	3	1	4	3	1	4	2	8	12	7	10	0	1	1	1	1	3	1	10	7	11	18	4	4	0	5	40	1	65	1	4	25
1598: Lactobacillus reuteri	0	1	1	4	18	2	1	19	4	5	1	24	13	13	14	6	421	15	0	3	0	0	11	7	4	339	3	74	1	0	0	43	1	0	0	1	22	1	1	89	110	3	37	4	3	618	3	3	38
491077: Lactobacillus reuteri SD2112	0	0	0	1	0	0	1	0	0	0	1	2	3	0	2	1	9	0	0	0	2	1	1	0	3	29	1	0	0	0	0	0	3	0	0	1	3	5	2	7	4	0	0	1	1	13	0	1	4
47715: Lactobacillus rhamnosus	0	0	2	1	6	0	5	71	2	4	4	4	5	1	7	7	39	0	1	0	1	0	0	2	0	82	1	2	0	0	0	3	1	0	0	0	2	3	11	1	0	0	0	0	0	1	1	0	8
568703: Lactobacillus rhamnosus GG	0	0	0	1	0	0	0	1	0	0	0	0	2	0	0	0	0	0	0	0	0	0	0	0	0	3	0	0	0	0	0	0	0	0	0	0	0	1	0	0	0	0	0	0	0	0	0	0	0
1069534: Lactobacillus ruminis ATCC 27782	1	3	0	4	29	0	1	5	5	0	1	8	1	0	1	0	1142	0	3	2	0	0	0	3	2	29	1	3	0	1	0	7	0	3	0	0	2	2	4	2	1	0	0	0	1	6	5	1	10
1599: Lactobacillus sakei	0	0	0	0	1	0	0	0	0	0	3	0	0	0	0	0	0	1	1	0	0	0	1	0	0	0	0	0	0	0	0	0	0	0	0	0	4	1	0	0	0	0	0	3	1	8	0	0	1
1624: Lactobacillus salivarius	84	8	86	677	284	1	141	133	955	23	107	818	58	33	14	164	5500	21	22	15	5	2	12	67	71	63	41	60	10	4	0	1	0	25	0	0	80	225	9	7	12	3	1	87	72	43	4	72	404
712961: Lactobacillus salivarius CECT 5713	0	2	0	71	15	0	6	12	5	3	2	4	2	4	0	1	1280	29	8	4	1	0	0	0	8	13	8	1	1	8	0	3	0	9	1	0	171	5	20	1	0	1	2	2	6	377	2	2	9
362948: Lactobacillus salivarius UCC118	0	3	7	2	8	10	7	8	3	5	0	0	1	3	3	5	220	2	0	0	0	2	1	0	5	6	2	2	1	0	0	0	0	2	0	0	16	3	14	7	8	0	0	0	0	361	2	15	0
1194971: Lactobacillus salivarius str. Ren	0	3	4	6	8	0	2	6	3	4	6	6	3	1	0	4	384	0	2	0	0	0	1	3	0	16	0	0	2	0	0	0	1	0	0	0	1	1	22	0	4	0	0	3	0	159	1	10	5
1545702: Lactobacillus sp. wkB8	1	4	3	4	31	0	5	0	7	2	5	6	3	0	0	7	6	2	0	0	0	0	0	1	0	0	2	2	0	0	0	2	2	1	2	0	5	3	0	1	0	0	1	1	0	7	0	2	19
1357: Lactococcus	1	0	2	3	5	0	3	4	1	7	1	1	1	0	2	6	2	1	1	1	3	1	0	2	2	1	1	1	0	0	0	1	2	4	0	0	3	12	68	0	0	0	0	2	1	0	1	12	4
1363: Lactococcus garvieae	1	15	11	4	44	0	24	5	26	28	6	67	7	8	3	1	0	3	4	0	12	0	8	3	1	3	9	4	1	1	2	7	0	3	2	0	1	4	1	0	1	0	1	22	1	16	0	24	5
420889: Lactococcus garvieae ATCC 49156	12	215	4	122	291	2	31	29	68	29	75	29	6	0	6	15	11	5	20	0	1	4	25	29	34	2	7	35	1	2	0	1	0	10	1	1	24	13	2	2	0	1	9	3	23	2	5	2	6
420890: Lactococcus garvieae Lg2	2	35	2	10	123	0	15	11	66	9	10	27	28	10	3	24	1	6	7	0	1	1	14	13	18	1	2	8	1	4	1	0	1	13	1	0	15	12	2	2	0	0	0	0	7	3	1	7	4
1358: Lactococcus lactis	12	26	20	62	190	0	36	40	79	48	58	70	21	43	14	140	5	37	17	6	32	5	17	36	16	22	35	13	1	5	2	10	3	17	4	3	33	236	935	6	8	2	15	338	19	33	3	31	17
1359: Lactococcus lactis subsp. cremoris	3	6	12	7	21	0	24	11	13	20	41	24	1	9	2	47	1	6	3	2	3	0	4	10	3	6	1	0	0	3	0	3	1	10	0	2	6	17	22	0	0	0	3	77	16	2	2	25	5
1449093: Lactococcus lactis subsp. cremoris IBB477	3	0	0	0	10	0	5	1	0	0	10	12	0	0	0	0	8	0	0	0	0	5	0	0	3	0	2	0	0	0	0	0	1	1	0	0	1	1	2	8	0	1	1	0	1	8	0	16	1
1111678: Lactococcus lactis subsp. cremoris UC509.9	0	1	6	18	15	0	1	4	4	0	3	7	2	0	0	1	0	0	0	0	0	1	2	4	2	7	0	1	0	0	0	0	0	1	0	0	4	2	1	1	0	1	0	5	2	0	0	3	0
1360: Lactococcus lactis subsp. lactis	0	7	3	6	30	0	6	11	7	2	8	17	2	28	6	42	2	5	3	1	13	0	9	27	2	4	1	2	2	4	1	8	1	5	0	0	4	64	248	19	1	0	0	53	10	7	2	6	4
684738: Lactococcus lactis subsp. lactis KF147	0	0	0	0	0	0	0	0	0	0	0	0	0	0	0	0	0	0	0	0	0	0	0	0	0	0	0	0	0	0	0	0	0	0	0	0	0	2	19	0	0	0	0	0	0	0	0	0	0
1364: Lactococcus piscium	9	22	10	60	236	0	49	32	66	18	56	469	67	6	2	33	7	11	7	17	1	3	15	14	16	10	1	12	1	16	0	141	12	69	3	1	37	14	3	5	0	1	7	9	20	5	122	34	7
297352: Lactococcus piscium MKFS47	16	96	31	84	467	2	44	86	173	64	53	1027	69	104	10	44	1	27	16	0	6	1	15	17	12	3	34	24	5	12	0	2	2	29	0	1	32	26	3	2	6	2	1	29	36	0	11	25	77
557598: Laribacter hongkongensis HLHK9	0	3	0	1	48	0	1	47	1	3	10	7	4	9	1	4	0	10	7	1	1	0	31	1	4	1	2	1	0	7	0	0	0	0	2	4	6	8	0	0	0	0	13	6	9	1	1	5	3
1528099: Lawsonella clevelandensis	7	3	2	52	56	2	6	8	48	12	16	25	12	5	20	6	4	19	17	23	3	1	86	24	4	27	13	6	5	16	1	3	2	17	2	4	23	19	10	24	0	13	70	19	1	22	19	7	22
363253: Lawsonia intracellularis PHE/MN1-00	0	0	0	1	3	0	0	1	0	0	0	0	0	1	0	0	0	0	0	0	0	0	0	0	2	0	0	0	0	1	0	0	0	1	0	0	4	2	0	0	0	0	0	0	0	0	0	0	1
649349: Leadbetterella byssophila DSM 17132	406	959	883	186	1627	2	587	2182	1585	196	887	38847	600	28217	5910	1514	0	300	86	326	4174	186	4351	849	1965	176	1229	2207	383	291	882	0	69	168	719	554	4001	783	12	80	25	0	1928	1483	2505	0	1	130	1682
83655: Leclercia adecarboxylata	0	0	0	0	0	0	0	0	0	0	0	0	0	0	1	0	0	0	0	0	1	0	0	0	0	0	0	0	0	0	0	0	0	0	0	0	0	1	0	0	0	0	0	0	0	0	0	0	0
445: Legionella	0	0	1	1	0	0	0	2	0	2	0	1	1	1	0	2	0	0	0	0	0	0	0	0	1	1	0	0	1	0	0	0	1	0	0	1	0	2	0	4	0	0	0	4	0	1	0	3	0
449: Legionella hackeliae	0	0	1	0	0	0	0	0	0	0	0	0	0	0	0	0	0	0	0	0	0	0	0	0	0	0	0	0	0	0	0	0	0	0	0	0	0	1	0	0	0	0	0	0	0	0	0	0	0
446: Legionella pneumophila	0	1	0	0	1	0	0	1	0	0	3	9	0	1	1	3	0	0	0	0	0	0	1	0	3	0	0	2	1	0	0	0	0	0	0	0	4	4	0	0	0	0	0	0	2	2	0	0	0
444: Legionellaceae	0	2	1	10	7	1	1	10	3	0	5	6	1	0	2	2	0	3	3	1	0	0	3	3	0	0	1	2	2	1	0	2	1	0	0	1	7	4	0	1	0	1	0	12	1	14	0	8	7
1575: Leifsonia xyli	0	1	0	2	0	0	1	2	1	0	2	3	0	0	0	1	0	1	5	1	2	0	1	4	4	2	0	2	0	0	0	0	0	0	0	0	0	5	0	0	0	1	0	1	1	0	0	1	19
1389489: Leifsonia xyli subsp. cynodontis DSM 46306	11	0	21	17	60	1	1	0	8	51	19	167	11	0	0	0	0	0	5	18	8	0	9	27	3	0	5	3	2	1	0	1	3	0	0	0	1	16	2	0	0	0	0	3	12	1	1	1	3
281090: Leifsonia xyli subsp. xyli str. CTCB07	0	6	0	8	16	0	3	3	37	10	18	11	1	2	4	0	0	7	3	1	12	1	13	3	0	0	0	2	1	87	0	0	0	0	3	0	2	10	0	0	0	0	1	13	2	0	0	1	131
1472767: Lentibacillus amyloliquefaciens	0	0	0	0	2	2	1	0	3	0	3	2	0	0	1	0	0	0	0	3	0	0	0	0	0	1	0	0	0	0	2	0	0	0	0	0	1	1	0	0	0	0	0	0	0	0	0	2	2
171: Leptospira	0	0	1	1	10	0	10	2	1	3	0	2	2	2	2	0	0	0	0	0	0	0	1	2	3	0	1	2	0	0	0	0	1	0	2	6	0	45	0	0	0	0	0	0	0	2	0	1	7
173: Leptospira interrogans	0	0	1	7	11	0	2	12	19	2	2	7	3	3	2	13	0	0	6	0	1	1	2	2	1	2	0	1	3	25	0	0	0	5	2	1	1	1	4	3	0	0	2	1	0	2	0	1	7
1162668: Leptospirillum ferrooxidans C2-3	0	2	1	0	2	0	0	0	1	0	0	0	1	3	0	0	0	0	0	1	0	0	0	0	0	0	1	0	0	2	0	0	0	0	0	0	0	1	0	0	0	0	1	1	0	0	0	0	0
32067: Leptotrichia	355	36	236	1259	2182	15	1972	1912	1866	2070	923	1502	1438	408	827	627	1	492	690	42	643	54	719	689	1725	130	729	771	61	41	26	44	505	409	23	26	1231	1185	157	245	18	4	175	719	71	109	99	139	8639
523794: Leptotrichia buccalis C-1013-b	2528	134	1475	2541	2151	75	6973	19584	5138	4425	6735	6310	11623	1570	1617	1217	1	3356	1053	267	5460	373	5136	3001	9595	574	2750	1759	754	242	311	429	5246	1555	269	242	7916	10853	1268	3804	957	28	1294	5597	465	522	481	562	26743
712357: Leptotrichia sp. oral taxon 212	1397	199	1319	4356	1263	10	1438	7319	6581	2127	2352	4691	1669	3130	5636	1009	0	2233	3806	230	1072	183	2303	2786	9849	120	964	876	1664	212	853	394	3472	1981	829	921	6309	6553	108	9579	100	11	190	1373	1677	103	94	1434	24094
1785996: Leptotrichia sp. oral taxon 847	1301	74	1271	13965	4585	40	2069	4028	1822	3308	2716	6977	12319	6220	955	1239	0	4166	2004	234	1568	265	1429	3873	6678	566	1010	2294	1213	159	126	1159	3744	5008	203	349	11174	3547	643	1148	247	30	271	3339	188	1913	205	413	9967
1129771: Leptotrichiaceae	275	18	63	94	110	2	148	353	369	406	287	579	868	168	280	187	0	204	226	22	70	14	63	296	1154	31	334	48	79	27	21	59	933	45	45	10	235	401	97	52	31	1	53	145	31	59	38	70	3999
1243: Leuconostoc	19	8	13	16	35	0	141	32	24	86	66	30	37	21	24	58	23	132	2	6	18	3	17	39	7	3	98	102	4	0	4	2	9	5	10	9	6	16	2	31	196	2	0	32	17	288	2	20	96
349519: Leuconostoc citreum KM20	4	1	1	14	62	0	9	6	13	9	47	50	1	3	21	5	5	16	0	0	3	0	30	4	1	8	6	3	1	3	0	2	0	3	0	0	32	5	0	0	4	0	1464	35	8	7	5	8	6
1245: Leuconostoc mesenteroides	22	0	22	13	23	0	1	67	51	0	5	0	0	0	0	6	0	4	0	0	3	0	0	0	0	0	1	49	0	0	0	1	0	0	1	0	75	5	0	0	0	0	0	18	1	0	14	261	31
427140: Leuconostoc mesenteroides KFRI-MG	0	0	0	0	0	0	1	0	0	0	0	0	0	0	0	1	0	0	0	0	0	0	0	0	0	0	0	0	0	0	0	0	0	0	0	0	0	1	0	0	0	0	0	0	0	0	0	0	0
33967: Leuconostoc mesenteroides subsp. mesenteroides	0	0	0	35	11	0	0	0	20	0	0	1	1	0	2	1	0	0	1	1	0	0	0	0	0	1	0	3	0	0	0	0	0	2	0	0	1	1	0	0	0	0	0	0	0	1	0	1	0
203120: Leuconostoc mesenteroides subsp. mesenteroides ATCC 8293	0	1	0	30	12	0	0	0	0	0	1	0	0	0	0	0	1	0	0	0	0	0	0	0	0	0	0	0	0	0	0	0	0	0	0	0	1	1	0	0	0	0	0	0	0	2	1	0	0
81850: Leuconostocaceae	1	4	13	4	0	0	8	57	15	0	3	0	2	1	0	0	1	0	2	2	0	0	3	0	0	6	0	2	1	0	1	1	1	1	0	0	3	1	0	0	0	1	4	2	4	1	0	1	1
1871022: Libanicoccus massiliensis	38	38	31	154	172	51	176	32	104	101	77	320	118	16	39	2	56	30	71	33	14	15	65	118	88	309	51	79	33	10	34	68	59	16	21	7	103	483	132	54	8	40	4	63	0	69	66	126	147
1215343: Liberibacter crescens BT-1	0	0	0	0	0	0	0	0	0	0	0	0	0	0	0	0	0	0	0	0	0	0	0	0	0	0	0	0	0	0	0	0	0	1	0	0	0	1	0	0	0	0	0	0	0	0	0	0	0
1555112: Limnochorda pilosa	27	16	11	67	135	0	11	27	143	13	4	16	12	5	0	43	1	1	2	0	9	5	3	17	9	5	0	22	4	3	0	1	2	9	0	0	29	24	0	14	0	5	0	0	121	0	2	3	6
665874: Limnohabitans	6	1	0	0	0	2	0	1	7	5	10	1	3	0	8	1	0	0	0	2	0	1	2	0	0	3	7	2	0	1	0	0	1	2	0	0	16	5	1	3	8	8	0	5	2	0	1	2	0
1678129: Limnohabitans sp. 103DPR2	0	5	0	1	13	0	232	65	37	1	18	41	33	2	14	807	0	16	468	6	63	0	347	44	8	0	63	103	9	164	33	0	1	0	8	2	31	11	1	1	7	1	98	76	35	2	5	3	1
1678128: Limnohabitans sp. 63ED37-2	9	15	0	7	2	37	9	14	155	26	17	3	3	6	4	9	7	26	6	10	3	4	11	6	9	13	4	6	5	7	4	1	1	9	13	1	10	20	18	13	6	33	13	9	20	0	13	27	6
1637: Listeria	0	13	5	20	188	0	24	46	58	23	69	14	7	8	38	108	8	16	26	13	2	1	9	15	19	8	3	1	1	1	2	2	3	2	3	0	12	4	0	5	3	0	16	9	11	1	6	14	21
702455: Listeria innocua FSL J1-023	0	3	1	0	0	0	1	2	0	0	1	0	0	0	0	0	1	0	1	0	0	0	1	0	1	0	2	0	0	0	0	1	0	0	0	0	0	1	1	0	0	0	0	4	0	1	0	0	0
1639: Listeria monocytogenes	6	7	8	16	43	5	4	23	24	23	46	18	6	20	12	15	7	15	10	13	5	4	29	3	21	27	15	8	2	3	1	5	0	3	14	5	15	7	0	3	4	2	25	19	4	4	3	51	5
552536: Listeria monocytogenes HCC23	0	0	0	0	0	0	0	0	0	0	0	0	0	0	0	0	0	0	0	0	0	0	0	0	0	0	0	0	0	0	0	0	0	1	0	0	0	1	0	0	0	0	0	0	0	0	0	0	0
882097: Listeria monocytogenes SLCC2376	0	0	0	0	1	0	0	0	0	0	0	0	0	0	0	0	0	1	0	0	1	0	0	0	0	0	0	0	0	0	0	0	0	0	0	0	0	1	0	0	0	0	0	0	0	0	0	0	0
571913: Luteipulveratus mongoliensis	0	3	0	0	9	1	0	1	0	1	3	3	0	2	0	0	0	0	0	0	0	0	1	2	3	2	0	1	1	1	1	0	3	1	0	1	0	4	2	0	1	1	1	7	0	0	1	2	6
1622118: Lutibacter profundi	0	0	0	1	9	0	4	4	0	0	5	4	0	1	1	2	0	1	4	0	15	0	5	22	0	0	7	1	0	9	0	0	0	0	0	0	24	14	0	0	0	1	1	44	4	0	0	1	0
1850246: Lutibacter sp. LPB0138	2	1	2	7	5	0	8	20	1	0	0	28	11	4	6	29	0	2	4	1	0	0	7	3	0	1	3	11	0	2	3	0	0	1	1	0	2	2	0	0	0	1	7	121	0	2	0	8	2
400634: Lysinibacillus	1	35	4	77	157	1	28	12	65	38	18	38	7	0	11	38	0	25	12	0	1	0	5	21	18	9	2	92	1	0	0	7	1	3	8	0	26	10	7	8	3	0	3	1	0	0	17	15	2
1421: Lysinibacillus sphaericus	69	30	5	100	806	0	50	35	126	6	165	81	11	43	16	51	0	58	2	43	22	7	49	49	39	26	58	32	26	123	29	13	11	34	46	44	60	15	6	5	2	0	82	12	7	0	2	20	19
1145276: Lysinibacillus varians	0	1	0	5	12	1	1	1	1	4	4	8	0	5	1	6	0	0	5	0	11	0	0	0	1	2	0	6	0	0	1	0	0	0	0	0	2	3	0	0	1	0	1	0	0	0	0	3	1
84531: Lysobacter antibioticus	0	1	0	0	2	0	0	31	0	3	0	0	0	0	1	0	0	6	0	0	0	0	1	0	6	0	1	0	0	0	0	0	0	3	0	0	0	7	0	0	0	0	4	0	0	0	0	0	0
435897: Lysobacter capsici	0	0	1	0	27	0	0	0	1	1	0	1	0	0	0	2	0	1	0	0	0	0	4	1	0	0	2	0	0	0	0	0	0	0	0	0	0	7	0	0	0	0	9	0	0	0	0	0	0
458233: Macrococcus caseolyticus JCSC5402	8	14	9	429	668	9	21	174	152	16	77	33	32	10	12	12	4	7	56	2	4	2	35	13	32	15	16	284	8	1	2	3	23	16	3	0	101	12	0	0	0	0	14	34	29	0	10	44	11
699246: Mageeibacillus indolicus UPII9-5	1	0	2	0	4	1	9	10	1	14	1	8	4	15	6	0	0	1	1	0	3	0	12	0	1	20	1	2	0	1	1	0	4	2	0	0	1	7	0	3	0	0	0	3	3	1	1	0	8
242507: Magnaporthe oryzae 70-15	2	15	5	0	0	2	0	0	3	1	2	1	2	1	3	8	1	1	6	10	0	0	3	1	7	8	1	3	2	4	1	0	2	4	2	0	3	1	1	0	0	1	10	13	3	2	2	3	8
156889: Magnetococcus marinus MC-1	1	2	6	9	9	0	3	2	4	2	2	2	0	1	0	3	0	0	3	0	0	0	2	0	0	4	0	1	1	0	0	0	0	0	0	0	13	2	0	0	0	0	1	1	6	0	0	11	1
1430440: Magnetospirillum gryphiswaldense MSR-1 v2	3	1	0	1	2	0	2	5	4	6	3	0	1	0	1	0	0	1	3	2	2	0	5	1	3	1	0	0	0	1	0	0	0	0	0	1	4	1	2	7	0	1	3	5	2	0	0	1	2
1663591: Magnetospirillum sp. XM-1	0	1	0	1	1	0	0	0	0	0	0	4	0	2	0	0	0	0	0	0	0	0	0	0	0	0	0	0	0	0	0	0	0	0	0	0	0	1	0	0	0	0	0	4	0	0	0	0	4
697281: Mahella australiensis 50-1 BON	7	42	43	71	220	0	79	33	132	27	56	231	54	35	36	35	13	23	7	0	14	4	40	47	40	4	8	11	6	133	25	27	15	32	13	1	77	62	0	9	0	5	0	23	8	18	2	22	53
202462: Maize bushy stunt phytoplasma	0	0	1	0	9	0	0	1	1	0	1	1	0	0	0	1	0	0	0	0	0	0	0	0	0	0	0	1	1	0	0	0	0	0	0	0	3	1	0	0	0	0	0	2	2	0	0	1	0
75984: Mannheimia	1	128	3	0	18	0	16	23	9	13	133	15	94	6	8	25	0	0	642	77	27	5	7	16	25	4	20	15	0	2	1	0	0	0	6	2	28	12	0	1	2	0	1	3	16	4	2	5	0
75985: Mannheimia haemolytica	3	168	8	0	2	0	10	25	3	4	30	68	496	23	3	87	0	1	159	62	5	1	15	12	14	3	99	12	5	18	2	0	1	6	44	55	79	11	0	0	4	0	40	22	53	0	9	18	3
1249526: Mannheimia haemolytica USDA-ARS-USMARC-185	0	4	0	1	0	0	0	2	0	0	0	2	0	1	4	0	0	0	0	2	1	0	0	0	0	0	2	0	0	0	0	0	0	0	1	1	11	6	0	0	1	0	0	0	1	0	0	1	0
1432056: Mannheimia sp. USDA-ARS-USMARC-1261	0	2	0	0	6	1	2	26	2	1	1	9	2	1	7	4	0	0	5	27	1	0	1	2	2	2	2	1	1	1	0	0	0	0	3	4	11	1	0	0	2	0	0	4	11	1	0	0	0
221988: Mannheimia succiniciproducens MBEL55E	3	1	0	2	0	7	2	322	259	9	25	8	8	6	15	25	1	1	3	8	1	0	1	8	3	0	4	23	1	0	1	1	2	2	4	92	5	2	0	0	3	0	2	170	11	0	6	1	1
1644130: Maribacter sp. 1_2014MBL_MicDiv	0	0	1	6	1	0	1	0	0	0	0	9	0	0	1	1	0	0	1	0	0	0	4	0	1	0	0	0	0	0	0	0	0	0	1	0	1	2	0	0	0	0	0	10	1	0	0	0	0
313603: Maribacter sp. HTCC2170	0	0	0	0	21	0	0	9	8	0	2	2	0	2	0	1	0	3	13	0	8	0	6	1	1	0	4	0	0	7	1	0	1	19	1	0	1	1	0	2	0	0	2	1	2	0	0	1	0
1836467: Maribacter sp. T28	0	0	0	0	1	0	0	1	0	0	1	1	0	0	1	0	0	0	0	0	0	0	1	0	0	0	0	0	0	0	0	0	0	0	0	0	0	1	0	0	0	0	0	0	0	0	0	0	0
765910: Marichromatium purpuratum 984	0	0	0	0	4	0	1	1	0	0	0	0	0	0	2	0	0	0	0	2	0	0	0	0	0	0	0	0	0	0	0	0	0	0	0	0	1	3	0	0	0	0	0	0	8	0	0	0	0
1911586: Marinilactibacillus sp. 15R	1	10	2	16	49	0	3	16	31	5	5	13	8	2	22	13	2	6	6	0	1	0	7	8	5	8	3	5	0	1	0	5	0	3	1	0	9	20	1	1	6	1	4	5	0	8	0	5	2
869210: Marinithermus hydrothermalis DSM 14884	2	0	0	14	5	0	1	4	40	6	32	8	7	23	27	1	0	1	16	0	0	2	10	15	5	0	1	1	1	0	3	0	0	1	0	2	29	2	0	2	0	0	0	2	4	1	0	0	6
443254: Marinitoga piezophila KA3	0	0	0	2	1	1	0	0	0	0	0	0	0	0	0	0	0	0	0	0	0	0	0	2	0	0	0	0	0	0	0	0	0	1	0	0	0	2	0	0	0	0	0	0	0	0	0	0	0
1545835: Marinitoga sp. 1137	0	1	0	1	3	0	0	1	0	1	2	1	0	0	0	0	0	2	0	0	3	0	0	0	1	1	3	0	1	0	0	1	1	1	0	0	1	4	0	0	0	0	1	0	1	0	0	4	0
2742: Marinobacter	0	0	0	3	5	1	1	6	7	3	2	1	0	1	1	3	0	2	0	1	2	0	5	1	1	2	1	0	0	0	0	0	1	2	0	1	2	3	0	0	1	1	0	2	2	0	0	0	0
1163748: Marinobacter hydrocarbonoclasticus ATCC 49840	0	0	0	0	0	0	0	1	0	0	0	0	0	0	0	0	0	0	2	0	0	0	0	0	0	0	0	0	0	0	0	0	0	0	0	0	1	1	0	0	0	0	0	0	0	0	0	0	0
1874317: Marinobacter salinus	0	0	0	0	0	0	0	0	0	0	0	0	0	0	0	0	0	0	0	0	0	0	0	0	1	0	1	0	0	0	0	0	0	0	0	0	0	1	0	0	0	0	0	0	0	0	0	0	0
491952: Marinomonas posidonica IVIA-Po-181	105	82	164	31	564	4	135	168	163	151	359	1599	94	120	87	94	54	141	65	24	32	25	255	239	125	141	52	85	81	186	42	156	344	265	73	79	127	568	51	42	21	79	79	139	55	148	18	229	87
400668: Marinomonas sp. MWYL1	0	2	0	1	1	0	0	0	0	8	2	12	30	0	0	1	0	2	1	5	0	0	3	1	0	0	0	1	1	0	0	0	0	0	1	0	13	40	0	0	0	0	0	0	1	0	0	0	1
643867: Marivirga tractuosa DSM 4126	27	22	8	22	262	1	10	26	34	9	6	40	4	78	15	63	0	3	4	2	37	0	7	1	2	7	6	11	0	1	1	0	0	3	1	1	19	8	0	1	0	1	1	3	38	0	0	8	12
1122214: Martelella mediterranea DSM 17316	0	0	10	3	0	1	0	2	7	0	1	1	0	5	0	0	15	0	0	5	0	0	0	0	0	20	0	7	0	0	0	0	0	0	0	0	3	1	1	2	0	0	0	0	3	0	0	0	0
686597: Martelella sp. AD-3	0	0	5	2	0	1	0	2	2	2	10	7	4	2	3	55	1	1	21	6	0	0	10	6	0	5	0	2	0	0	0	0	0	0	0	0	2	10	0	2	0	0	0	12	5	10	0	0	0
11855: Mason-Pfizer monkey virus	2	2	8	0	4	4	4	2	7	2	8	2	3	2	0	2	3	0	0	2	4	0	3	2	6	43	5	4	1	1	0	2	0	1	1	0	5	2	4	2	3	4	0	9	0	0	1	17	41
149698: Massilia	0	1	1	0	1	10	0	3	0	7	0	0	0	0	0	4	0	0	0	9	0	0	0	6	0	0	0	2	0	0	0	0	0	6	0	0	0	2	0	0	0	0	1	21	1	0	1	7	3
1141883: Massilia putida	0	0	0	0	1	0	0	3	0	0	3	1	0	0	0	4	0	14	4	3	0	0	0	3	2	2	0	3	0	0	0	0	0	1	1	0	0	18	0	0	0	0	0	9	0	4	0	1	0
1678028: Massilia sp. NR 4-1	0	5	1	12	26	0	0	4	4	9	5	1	3	1	3	8	3	0	2	0	0	0	2	0	1	0	8	1	3	1	0	1	0	4	2	0	6	1	1	0	0	0	3	29	0	0	0	4	1
907: Megasphaera elsdenii	64	5	44	567	451	2	148	26	64	98	107	303	137	19	29	50	90	18	54	17	21	21	72	111	135	50	53	58	10	20	5	118	46	35	10	15	229	232	116	210	12	16	5	49	4	265	48	82	464
1458465: Megasphaera elsdenii 14-14	23	1	61	168	234	6	137	44	27	54	117	124	48	10	12	16	60	8	23	11	10	14	45	69	109	24	21	22	7	31	2	10	77	21	3	7	112	338	12	73	3	2	2	11	3	88	16	72	464
1064535: Megasphaera elsdenii DSM 20460	133	84	142	1450	653	1	739	121	1057	231	174	811	478	135	87	135	147	219	260	58	150	198	1162	770	1015	711	76	693	145	1014	167	210	164	296	196	114	1324	651	172	337	23	21	19	139	20	621	14	160	744
504728: Meiothermus ruber DSM 1279	0	1	0	1	7	1	0	0	2	0	2	1	0	0	0	0	0	3	1	0	0	0	2	0	0	0	0	0	0	0	0	0	0	0	0	0	0	1	0	0	0	0	2	0	0	0	0	2	2
526227: Meiothermus silvanus DSM 9946	0	2	3	0	3	0	0	1	3	0	0	1	0	0	0	0	0	0	0	0	0	0	0	0	0	0	1	2	0	0	0	0	0	0	0	0	1	15	0	0	0	0	0	0	2	0	0	2	2
1090974: Melissococcus plutonius DAT561	2	3	4	18	9	0	2	2	2	4	73	15	0	1	0	3	1	11	0	0	0	0	20	1	8	0	0	3	2	0	0	1	0	6	0	1	1	3	1	2	0	1	0	0	5	10	0	1	0
1385937: Melissococcus plutonius S1	1	5	1	1	5	0	2	1	23	0	1	0	0	1	0	2	1	1	0	0	0	0	0	0	0	0	0	0	1	0	0	0	0	0	0	0	2	1	3	0	0	0	1	0	1	0	0	7	0
265311: Mesoplasma florum L1	0	0	0	0	3	3	0	0	5	1	1	5	0	0	0	0	0	0	0	0	0	0	0	0	0	0	1	0	0	0	0	1	0	0	0	0	0	1	1	1	0	2	0	1	0	0	0	2	1
68287: Mesorhizobium	0	0	2	5	2	0	0	2	3	0	3	3	0	4	4	2	0	10	0	0	4	0	2	2	1	2	2	1	0	0	0	0	1	1	0	2	5	2	0	0	0	0	1	1	1	0	0	0	1
39645: Mesorhizobium ciceri	0	0	0	0	0	3	0	5	0	0	7	4	0	3	0	2	0	2	4	0	6	0	1	0	0	0	0	0	0	6	2	0	0	0	0	0	3	3	2	0	0	0	51	0	2	2	0	0	0
763057: Mesorhizobium huakuii 7653R	1	2	1	2	4	0	2	2	2	3	5	2	0	0	3	5	0	1	2	0	1	0	0	1	1	6	1	2	1	2	3	1	2	1	0	1	1	7	3	0	1	0	0	2	0	0	0	2	14
1156937: Methylacidiphilum fumariolicum SolV	0	5	0	1	0	0	1	0	1	0	1	2	0	1	0	0	0	0	0	0	0	0	0	1	0	0	0	0	0	0	0	0	0	0	0	0	0	1	0	1	0	0	0	0	0	0	0	0	0
420662: Methylibium petroleiphilum PM1	1	106	6	0	84	4	181	197	76	103	122	10	137	1	12	309	0	3	97	97	101	0	42	59	12	1	5	94	12	68	2	0	0	6	78	0	76	320	0	0	18	1	272	7	60	54	0	12	0
407: Methylobacterium	0	11	0	1	3	0	5	4	7	11	4	2	3	3	2	13	3	10	5	3	0	6	6	6	2	8	6	11	0	0	0	0	1	0	3	0	5	3	1	0	1	2	2	3	17	2	9	11	8
270351: Methylobacterium aquaticum	0	0	0	0	1	1	0	2	0	0	3	0	0	1	0	0	0	1	0	1	0	0	0	1	0	2	0	0	0	0	0	0	0	0	0	0	0	1	0	0	0	0	0	1	0	1	1	1	0
440085: Methylobacterium extorquens CM4	1	0	1	0	1	1	0	0	1	0	0	0	0	0	0	2	0	5	0	0	0	0	0	0	0	0	0	0	0	0	0	0	0	0	0	0	0	1	0	0	0	0	0	0	1	0	0	0	0
460265: Methylobacterium nodulans ORS 2060	0	0	0	0	0	0	1	0	1	1	0	1	0	2	0	0	0	0	1	0	0	0	0	1	0	1	0	0	0	0	0	0	0	1	0	0	0	1	0	0	1	0	0	0	0	1	0	0	0
418223: Methylobacterium phyllosphaerae	2	0	0	0	1	0	1	2	0	0	0	15	0	0	0	0	0	0	0	2	0	0	0	0	1	1	0	0	0	0	0	0	0	0	0	0	0	3	0	0	0	0	0	2	0	0	0	3	0
426117: Methylobacterium sp. 4-46	0	0	0	0	0	0	0	1	0	0	0	0	0	0	0	0	0	0	0	0	0	0	0	0	0	1	1	0	0	0	0	0	0	0	0	0	0	2	0	4	0	0	0	0	1	1	0	0	0
1091494: Methylomicrobium alcaliphilum 20Z	2	2	2	6	25	11	5	34	7	4	0	2	6	4	4	10	0	9	10	0	1	0	5	9	6	0	5	17	0	2	0	1	3	3	1	2	23	22	1	8	1	0	9	0	25	4	0	1	18
857087: Methylomonas methanica MC09	0	2	1	0	7	0	2	0	1	11	15	9	0	10	1	0	0	4	0	1	0	0	0	0	0	0	1	0	0	0	0	0	0	0	0	0	0	1	0	1	1	0	0	2	0	1	0	1	1
1727196: Methylomonas sp. DH-1	0	5	3	1	9	0	0	13	3	7	11	1	4	0	1	2	0	1	9	2	1	0	8	2	4	0	5	4	0	5	0	0	1	0	2	1	0	4	0	0	0	0	9	5	4	0	0	2	0
754477: Methylophaga frappieri	0	0	0	3	0	0	0	4	2	0	0	3	2	1	1	2	0	1	0	1	0	0	1	0	0	0	1	1	0	0	0	0	0	0	0	0	0	1	0	6	0	1	0	0	1	0	0	2	4
32011: Methylophilaceae	1	0	0	0	1	2	2	7	1	1	3	9	1	0	2	0	0	2	4	0	2	0	2	0	2	1	0	2	0	2	0	0	0	1	0	0	2	1	1	1	0	2	3	22	0	0	0	1	0
1623448: Methylophilales bacterium MBRSF5	0	3	1	0	6	0	6	4	6	6	3	0	1	7	0	0	0	5	0	0	0	0	3	0	1	3	2	1	0	1	0	0	0	0	2	0	0	5	0	0	1	0	4	4	3	0	0	3	0
1662285: Methylophilus sp. TWE2	8	287	22	6	14	1	14	915	28	44	65	22	4	80	40	56	3	5	129	8	22	0	43	12	22	8	44	31	3	8	1	0	0	0	3	2	12	1	3	1	10	0	29	35	26	2	6	44	36
666681: Methylotenera versatilis 301	0	1	0	0	0	0	1	1	0	0	3	0	0	0	0	0	0	0	0	1	0	0	0	0	0	0	1	0	0	0	1	0	0	0	0	0	1	2	0	0	0	1	0	0	0	0	0	0	0
81682: Methylovorus	0	0	3	0	12	1	2	18	16	26	4	0	0	3	0	0	0	0	30	0	1	0	0	0	2	0	2	0	0	6	0	0	0	0	0	0	1	3	0	0	0	0	0	0	1	0	0	0	0
582744: Methylovorus glucosetrophus SIP3-4	1	4	0	0	13	0	3	5	3	0	4	8	2	2	1	7	0	7	34	4	1	0	4	2	0	0	0	0	0	5	0	0	0	0	1	1	6	6	0	2	0	0	20	2	9	0	0	0	1
887061: Methylovorus sp. MP688	0	14	0	0	0	0	3	0	43	4	2	6	0	3	0	13	0	12	0	0	0	0	1	0	0	2	0	0	0	0	0	0	0	0	41	0	0	2	0	0	0	0	8	4	2	0	2	2	0
85023: Microbacteriaceae	16	26	38	68	114	25	35	52	40	46	53	102	45	73	24	33	52	32	65	20	7	6	264	46	31	67	29	20	5	12	2	12	10	11	19	12	30	65	16	8	6	11	28	210	87	17	12	33	63
33882: Microbacterium	2	6	6	10	30	2	11	6	13	12	12	19	7	57	6	25	2	31	6	4	2	2	28	4	0	15	4	4	0	3	0	0	1	1	1	1	1	9	1	0	1	2	35	11	11	0	1	9	11
84292: Microbacterium chocolatum	3	2	0	0	12	0	0	1	2	5	43	3	2	1	2	4	0	2	8	2	2	0	6	2	5	2	80	4	2	2	0	1	2	0	0	0	4	7	0	0	1	0	4	0	0	0	1	1	17
104336: Microbacterium foliorum	2	2	1	76	11	0	0	3	4	4	1	4	4	1	0	1	0	3	2	2	6	0	2	5	1	4	2	0	1	0	1	3	0	0	0	0	8	10	0	0	1	1	0	1	0	0	0	3	16
1916917: Microbacterium sp. 1.5R	0	0	0	3	5	0	1	0	6	4	3	0	0	0	1	0	2	0	1	2	0	0	0	5	1	3	0	1	0	1	0	0	3	0	0	0	2	2	0	0	0	8	1	5	2	0	5	4	5
1906742: Microbacterium sp. BH-3-3-3	1	3	0	6	35	0	4	2	5	8	6	23	3	0	2	6	0	8	5	2	2	3	23	12	4	3	5	6	2	2	0	2	11	5	0	0	6	5	0	5	1	0	0	7	2	3	0	3	42
1696072: Microbacterium sp. CGR1	2	0	4	10	9	0	17	4	2	5	9	6	3	1	2	2	0	2	0	5	0	0	4	2	3	2	1	6	1	2	0	6	0	0	0	1	0	2	3	0	5	0	0	10	3	0	1	1	5
1714373: Microbacterium sp. No. 7	0	0	2	1	19	0	3	3	2	2	4	11	0	1	1	0	0	1	3	1	0	0	0	4	0	0	1	0	1	0	0	0	0	0	0	1	0	1	0	1	1	0	0	1	3	0	0	2	7
367477: Microbacterium sp. XT11	0	0	1	2	10	0	1	9	3	4	4	7	2	1	6	3	0	3	3	0	3	0	1	9	3	1	4	1	0	2	1	3	0	1	0	1	2	6	0	1	0	0	2	5	2	0	0	2	25
979556: Microbacterium testaceum StLB037	3	1	3	0	22	0	1	2	0	6	2	17	3	1	1	1	0	1	3	1	4	0	3	1	1	2	1	0	0	0	0	1	1	1	1	0	1	5	1	2	0	0	0	1	1	0	0	5	8
260552: Microbulbifer agarilyticus	3	4	2	18	9	0	7	0	19	5	2	11	2	1	13	0	3	3	0	1	1	0	7	7	21	2	6	12	0	0	1	0	0	2	0	0	2	10	0	0	1	4	0	3	1	0	0	0	49
1769779: Microbulbifer sp. CCB-MM1	1	3	0	1	0	0	0	2	2	2	3	5	1	2	0	0	0	3	5	0	1	0	0	0	0	2	0	0	0	0	0	0	0	0	0	0	2	3	0	0	0	0	30	1	2	0	0	14	1
1268: Micrococcaceae	2626	763	515	4562	2072	1910	825	3383	1655	1291	1974	6018	1587	2147	1388	1926	969	5571	16434	666	1171	1499	1826	6171	3831	1827	7172	1653	615	8726	934	1221	893	4139	2202	2914	2559	2569	326	469	210	620	2337	978	2238	1626	6782	3460	1420
85006: Micrococcales	71	939	899	278	576	1023	144	677	256	284	1322	627	15447	11425	262	653	118	132	396	52	891	130	240	681	154	233	3282	739	45	218	379	90	331	182	50	169	193	338	68	60	57	297	94	252	149	74	116	143	522
1270: Micrococcus luteus	15	8	10	72	195	17	26	201	132	33	80	105	55	42	20	43	15	10	46	22	12	43	40	45	23	68	129	16	19	103	0	12	19	16	6	16	15	55	29	74	3	9	13	40	19	14	43	55	140
465515: Micrococcus luteus NCTC 2665	9	22	7	46	55	70	35	28	58	17	55	42	43	25	63	23	1	23	101	15	23	4	11	51	35	9	23	26	7	138	10	2	33	12	10	45	10	77	116	75	13	38	12	21	19	14	10	11	91
1903187: Microcystis aeruginosa PCC 7806SL	0	0	0	0	0	0	0	0	0	0	0	0	0	0	0	0	0	0	0	0	0	0	0	0	1	0	0	0	0	0	0	0	0	0	0	0	0	2	0	0	0	0	0	0	0	0	0	0	0
1032480: Microlunatus phosphovorus NM-1	16	3	2	0	4	0	3	5	2	7	3	0	2	1	1	1	0	1	9	3	0	5	1	7	4	2	1	0	3	6	0	3	2	0	1	1	1	25	2	4	0	0	2	0	12	6	0	2	6
1873: Micromonospora	0	0	0	0	1	0	0	0	1	0	1	0	0	0	0	0	5	0	0	0	0	0	0	0	0	1	0	0	0	0	0	0	0	0	0	0	0	1	0	0	0	0	0	0	0	0	0	5	0
644283: Micromonospora aurantiaca ATCC 27029	0	0	0	1	6	0	0	1	0	0	0	1	0	0	1	0	0	0	1	0	0	0	0	1	0	0	0	0	0	0	0	1	0	0	0	0	2	2	1	0	0	0	0	10	0	0	0	0	4
28056: Micromonosporaceae	0	3	0	0	1	0	0	6	1	1	0	1	4	5	0	5	0	3	3	1	0	0	0	4	0	12	1	3	0	0	0	0	0	2	0	0	2	2	2	2	0	2	5	0	1	0	0	0	1
412690: Microterricola viridarii	16	1	5	6	38	1	5	15	18	10	4	45	5	9	4	2	0	7	11	1	1	0	3	5	3	5	4	4	4	1	5	4	6	4	2	1	5	222	14	3	0	2	1	10	1	10	3	4	29
1658665: Mitsuaria sp. 7	4	8	9	7	12	0	6	38	54	2	2	22	1	2	13	141	5	6	53	3	4	7	86	42	3	2	21	4	5	0	1	0	0	0	62	3	3	176	0	1	0	0	11	90	8	1	34	35	0
548479: Mobiluncus curtisii ATCC 43063	3676	21	157	4271	5876	13	892	600	6215	726	1174	2848	1596	263	1783	120	31	475	7657	570	951	345	681	12478	1359	50	964	804	2245	957	623	504	978	885	354	705	1312	3155	2667	9097	75	1080	851	2503	65	1933	565	163	11025
31969: Mollicutes	1	1	0	5	6	0	2	0	4	3	5	6	1	0	1	4	1	3	0	0	0	0	1	6	3	2	0	0	3	0	1	0	0	2	1	1	2	5	0	0	0	0	0	33	1	1	1	2	6
1454205: Moorea producens JHB	0	1	0	0	5	0	0	1	0	1	0	0	0	0	0	0	0	0	0	0	1	0	0	1	0	0	0	0	0	0	0	0	0	0	0	0	0	1	0	0	0	0	0	0	0	0	0	2	0
1525: Moorella thermoacetica	14	7	2	31	22	0	18	15	6	6	12	14	11	15	18	4	2	8	126	1	7	0	30	12	18	25	19	18	9	11	12	3	5	6	2	21	19	28	12	0	1	0	1249	5	5	21	2	4	5
475: Moraxella	0	11	3	1	30	1	2	13	32	0	5	15	8	5	2	5	1	3	1	7	0	0	7	2	0	3	28	12	0	0	0	0	0	18	0	0	156	26	0	0	0	0	1	3	74	1	1	10	1
480: Moraxella catarrhalis	0	1	2	0	4	0	1	6	2	1	4	0	0	2	0	1	1	4	0	10	0	0	0	0	1	0	2	0	0	0	0	0	1	2	2	0	8	1	0	0	0	0	2	0	3	0	1	2	4
468: Moraxellaceae	6	5	11	1	7	7	0	13	3	10	9	4	0	4	18	7	19	107	11	114	1	4	17	9	22	18	18	15	9	8	3	1	5	10	7	4	23	10	4	0	0	1	22	2	3	1	4	11	4
1903414: Morganellaceae	0	0	0	0	12	3	0	8	2	0	6	1	0	0	0	2	0	2	0	1	0	0	1	2	0	1	0	11	0	0	0	1	0	0	0	0	2	3	0	0	0	1	0	0	2	0	0	1	1
1433126: Mucinivorans hirudinis	8	2	64	7	8	0	17	23	9	8	35	7	5	10	18	19	3	13	75	8	18	3	12	1	12	17	8	0	9	20	7	2	3	3	9	7	8	40	3	7	1	0	33	10	5	10	1	13	20
1852373: Murdochiella sp. Marseille-P2341	1	0	4	8	17	2	5	4	3	0	2	0	0	0	2	0	3	1	0	0	1	0	3	1	0	0	3	1	1	0	0	0	0	2	0	0	0	4	0	0	1	0	0	1	0	0	0	1	5
516051: Muricauda lutaonensis	0	7	32	32	4	3	2	32	20	1	13	72	24	25	5	17	46	4	29	14	9	0	1	9	13	55	5	37	0	18	4	0	0	0	4	1	10	16	14	7	0	2	1	5	12	1	0	13	3
1762: Mycobacteriaceae	99	1	6	53	1065	0	1	17	734	0	17	23	40	35	12	27	5	0	45	1	12	0	8	31	0	24	11	8	11	4	1	15	50	22	2	0	28	30	3	32	0	0	0	97	89	23	7	55	5
1763: Mycobacterium	113	36	70	538	619	12	83	146	286	121	109	336	239	104	220	43	48	76	375	52	42	11	111	660	99	140	28	90	115	172	341	102	93	100	65	88	218	301	107	493	38	36	28	247	85	81	21	66	752
36809: Mycobacterium abscessus	6	14	5	23	78	5	6	42	11	7	15	33	10	71	7	14	147	32	35	9	1	0	21	15	8	99	13	33	1	2	0	2	1	8	1	0	17	27	5	11	0	6	4	16	7	46	1	12	16
1764: Mycobacterium avium	0	0	0	0	6	0	2	1	2	0	1	4	0	2	1	1	0	0	0	0	0	0	1	0	0	1	1	0	0	0	0	0	0	0	0	0	1	2	0	0	0	0	0	2	1	0	0	0	0
120793: Mycobacterium avium complex (MAC)	1	0	0	1	5	0	0	0	2	0	0	2	0	0	2	0	0	0	0	0	0	0	0	1	0	0	0	1	0	0	0	0	3	1	0	0	0	2	0	0	0	1	1	3	0	0	0	1	3
1229671: Mycobacterium avium subsp. hominissuis TH135	1	0	0	0	0	0	0	0	2	1	0	1	0	0	0	3	0	0	0	1	0	0	0	0	0	0	0	0	0	0	0	0	0	1	0	0	1	1	0	0	0	0	0	0	0	0	0	1	2
1765: Mycobacterium bovis	0	2	4	1	1	0	1	2	1	1	0	2	0	0	2	1	0	0	2	0	2	0	0	0	0	1	0	0	2	2	2	2	1	3	0	3	2	1	0	0	0	0	3	0	0	0	0	2	0
78331: Mycobacterium canettii	43	0	2	1	1	0	13	6	29	6	47	16	4	0	1	5	0	5	6	3	2	2	19	19	8	0	0	2	23	1	1	1	1	1	0	3	3	346	69	1	1	4	0	0	0	0	2	0	162
1205674: Mycobacterium canettii CIPT 140070010	2	0	0	0	5	0	4	0	0	0	2	0	0	0	0	0	0	1	0	0	0	0	0	1	1	0	0	0	1	1	0	0	0	0	0	0	0	5	4	1	0	0	0	0	0	0	0	1	2
1205677: Mycobacterium canettii CIPT 140070017	3	0	0	0	1	0	0	3	1	1	1	0	2	6	24	0	0	0	0	0	1	0	1	8	0	0	1	0	1	3	0	0	1	0	0	0	0	13	3	85	0	0	0	2	0	16	0	0	6
1774: Mycobacterium chelonae	0	0	1	1	0	0	0	0	1	2	0	2	0	0	0	0	0	0	0	0	0	0	0	0	0	2	0	0	0	0	0	0	0	0	0	0	0	1	0	1	0	2	0	1	0	0	0	0	1
670516: Mycobacterium chelonae group	3	0	0	3	18	0	3	0	10	0	9	9	2	0	0	1	1	0	0	0	0	0	0	2	0	0	0	0	0	1	0	0	3	0	0	0	0	2	0	6	0	0	0	0	7	1	0	0	8
710421: Mycobacterium chubuense NBB4	0	0	22	2	7	0	1	18	6	2	4	4	2	4	1	0	2	0	1	6	1	0	1	7	1	6	0	8	2	0	0	1	2	1	0	0	15	3	0	0	0	0	0	1	1	2	0	5	1
1041522: Mycobacterium colombiense CECT 3035	0	0	0	0	1	0	0	3	11	0	0	0	0	0	1	1	0	0	0	0	0	0	0	0	0	0	0	0	0	0	0	0	0	0	0	0	0	2	0	0	0	0	0	0	0	0	0	4	2
1766: Mycobacterium fortuitum	1	0	0	0	0	0	0	0	0	0	0	0	0	1	0	0	0	0	0	0	0	0	0	0	0	0	0	0	0	0	0	0	0	0	0	0	0	1	0	0	0	0	0	0	0	0	0	0	7
1202450: Mycobacterium haemophilum DSM 44634	0	0	0	0	0	0	0	3	0	0	1	0	0	0	0	1	0	0	0	0	0	0	1	0	0	0	0	0	0	0	0	0	0	0	0	0	0	2	0	0	0	0	0	0	0	0	0	1	0
1768: Mycobacterium kansasii	71	463	468	129	383	29	208	519	160	279	297	241	136	168	184	350	90	154	167	125	182	44	355	326	379	350	182	140	296	483	348	259	554	212	226	228	301	369	66	49	38	27	113	422	127	70	89	386	840
1299328: Mycobacterium kansasii 824	1	4	1	2	5	0	1	2	0	3	1	1	3	2	4	5	0	3	3	1	2	2	4	2	0	1	4	2	6	5	1	5	2	1	1	1	5	2	2	2	0	0	1	7	0	0	2	5	12
861047: Mycobacterium phage bron	0	0	0	0	2	0	0	0	0	0	0	0	0	0	0	0	0	0	0	0	0	0	0	1	1	0	0	0	0	0	0	0	0	0	0	0	0	2	0	0	0	0	0	0	0	0	0	0	1
1771: Mycobacterium phlei	0	1	1	0	12	0	0	1	1	3	1	5	0	2	1	1	0	2	0	0	0	0	7	2	0	2	1	1	1	0	1	0	0	0	0	0	0	5	2	1	0	0	0	4	0	0	0	0	11
710685: Mycobacterium rhodesiae NBB3	0	0	0	0	1	0	1	10	0	0	1	10	2	0	0	14	0	0	1	0	1	0	0	7	1	9	0	1	0	0	0	0	0	0	0	0	2	2	0	0	0	0	0	2	6	6	0	5	0
370526: Mycobacterium rutilum	2	0	1	1	6	0	1	6	3	0	0	0	11	0	1	2	0	0	1	0	0	0	2	0	0	3	0	1	0	0	0	2	2	8	0	0	0	1	0	1	0	1	0	2	0	1	0	0	1
875328: Mycobacterium sinense	5	6	0	16	48	40	18	13	3	8	7	66	26	1	9	5	5	6	65	0	2	2	5	21	25	7	33	2	2	107	6	2	11	3	21	14	6	9	3	3	2	17	41	18	21	6	6	5	2
1772: Mycobacterium smegmatis	2	0	0	2	15	0	8	7	15	8	13	12	1	0	20	0	0	1	5	0	2	0	0	4	1	1	0	28	2	0	1	1	2	0	8	20	1	3	1	2	1	0	0	14	1	0	0	1	20
246196: Mycobacterium smegmatis str. MC2 155	9	0	0	5	5	0	3	0	0	1	0	6	0	1	1	0	0	0	5	0	1	0	1	3	0	2	0	1	0	2	0	0	2	0	0	4	1	7	0	0	0	2	0	2	0	0	0	0	3
212767: Mycobacterium sp. JS623	10	8	35	3	104	0	31	116	12	4	27	49	13	130	8	31	1	12	18	0	1	0	6	46	6	111	0	11	3	4	0	20	0	16	0	2	24	50	1	17	3	2	6	6	11	37	0	77	3
1879023: Mycobacterium sp. djl-10	0	0	0	0	11	0	0	1	2	0	2	4	1	1	3	2	0	0	4	3	0	0	0	4	0	0	2	0	0	3	0	0	0	0	0	0	0	1	0	0	0	31	2	3	5	0	0	3	33
1773: Mycobacterium tuberculosis	4	2	2	0	8	0	0	1	0	2	0	0	1	0	1	1	0	0	0	0	0	0	0	1	0	2	0	0	0	0	0	0	0	0	0	0	0	2	0	2	0	0	0	0	0	0	0	0	1
83332: Mycobacterium tuberculosis H37Rv	3	5	9	0	6	1	2	4	2	1	8	4	3	3	3	12	2	3	2	0	1	0	4	7	5	6	0	1	0	5	10	6	12	5	1	4	4	5	1	2	1	1	2	7	1	0	4	6	16
77643: Mycobacterium tuberculosis complex	2	0	0	2	2	0	1	0	4	1	0	2	1	1	6	2	0	0	0	0	0	0	0	4	0	3	0	1	1	0	1	0	2	0	0	0	1	2	0	0	1	0	0	2	0	1	0	0	4
1354275: Mycobacterium vaccae 95051	0	0	1	0	15	0	1	0	1	0	1	4	0	1	0	0	0	0	0	0	0	0	0	0	1	0	0	0	0	0	0	0	0	0	0	0	0	2	0	0	0	0	0	0	0	1	0	2	8
2093: Mycoplasma	12	48	47	75	986	7	45	83	158	73	182	74	33	30	41	48	5	11	39	93	4	5	36	38	14	212	20	114	2	4	1	3	1	15	3	3	100	9	2	7	2	9	14	36	16	2	26	31	11
1397850: Mycoplasma californicum HAZ160_1	0	0	0	0	0	0	0	0	0	0	0	0	0	1	1	0	0	0	1	0	0	0	0	0	0	2	0	0	0	0	0	0	0	0	0	0	2	1	0	0	0	0	0	0	0	0	0	0	0
29554: Mycoplasma canadense	0	0	4	4	3	0	1	2	4	0	1	2	1	0	0	2	0	0	1	15	0	0	0	0	0	12	0	18	0	1	0	0	0	0	0	1	2	1	0	0	0	1	0	0	1	0	1	0	2
40480: Mycoplasma capricolum subsp. capripneumoniae	0	0	0	1	0	0	1	0	0	1	1	1	3	0	0	3	1	0	1	1	1	0	2	0	0	1	1	0	0	0	0	0	1	1	0	0	1	3	0	0	0	0	0	1	0	0	0	0	0
1246955: Mycoplasma cynos C142	0	0	0	13	11	0	0	0	0	0	0	5	0	0	0	1	0	0	0	0	0	0	0	0	0	0	0	1	1	0	0	0	0	1	0	0	0	2	0	0	0	3	0	1	0	0	0	0	0
2115: Mycoplasma fermentans	0	0	0	1	11	0	6	4	38	0	3	5	0	2	0	0	0	2	0	1	0	1	7	1	8	14	7	2	0	3	0	0	0	1	0	0	0	6	0	1	0	0	2	4	1	0	0	12	0
743971: Mycoplasma flocculare ATCC 27399	0	0	0	0	2	0	0	0	1	0	0	0	0	0	0	2	0	0	0	1	0	0	1	1	0	0	0	0	0	0	0	0	0	0	0	0	0	1	0	0	0	0	0	0	0	0	0	0	0
2096: Mycoplasma gallisepticum	3	8	2	4	8	0	3	9	2	2	10	13	0	6	4	3	3	0	2	2	2	0	10	16	2	3	5	2	0	6	6	0	3	2	0	6	20	6	14	1	3	0	8	4	0	2	0	2	13
1159202: Mycoplasma gallisepticum NC06_2006.080-5-2P	0	0	5	1	4	0	1	0	0	4	1	4	5	0	0	4	0	3	0	0	0	0	0	4	3	1	0	8	0	0	0	6	0	0	0	0	0	2	0	0	0	1	0	0	0	0	0	8	0
347256: Mycoplasma hominis ATCC 23114	0	0	1	47	1	0	0	0	0	1	2	0	7	0	51	0	7	1	0	40	0	0	0	0	0	8	0	22	0	0	1	0	0	0	0	0	1	2	0	0	0	110	15	0	3	0	0	1	3
1267000: Mycoplasma hominis ATCC 27545	1	0	0	1	4	0	1	0	0	0	4	1	0	0	0	1	0	0	0	5	0	1	0	0	1	1	0	1	2	1	0	0	0	1	0	0	1	2	0	0	0	0	0	0	1	0	0	0	0
2100: Mycoplasma hyorhinis	0	8	0	0	20	0	1	1	3	2	2	4	4	1	0	0	0	2	0	0	2	0	1	0	2	0	1	0	1	0	0	0	0	0	0	0	0	1	0	0	0	0	1	2	1	0	0	3	0
267748: Mycoplasma mobile 163K	0	2	0	5	5	0	0	0	1	0	9	2	1	1	1	2	1	1	2	0	0	1	3	7	3	0	2	1	1	0	3	0	0	1	0	0	4	1	0	0	0	0	3	2	0	0	0	1	0
272633: Mycoplasma penetrans HF-2	0	1	0	1	1	0	0	0	2	1	1	0	0	0	0	0	1	0	0	1	0	0	0	0	0	0	0	0	0	0	0	0	0	0	0	0	3	1	0	0	0	0	1	0	0	0	0	0	0
2104: Mycoplasma pneumoniae	1	0	8	16	13	0	27	4	8	11	16	11	3	2	0	0	0	2	0	10	1	1	5	6	5	1	1	2	0	2	0	0	3	0	0	0	6	18	2	12	1	0	0	4	0	21	0	6	39
1263763: Mycoplasma pneumoniae M1139	0	0	0	0	0	0	0	0	0	0	0	0	0	0	0	1	0	0	0	0	0	0	0	0	0	0	0	0	0	0	0	0	0	0	0	0	0	1	0	0	0	0	0	0	0	0	0	0	0
2123: Mycoplasma putrefaciens	2	0	0	0	0	0	1	2	0	3	0	9	0	1	1	0	0	0	0	0	0	1	1	1	9	3	5	0	0	1	0	0	0	1	0	0	5	3	0	0	0	0	0	22	2	0	0	1	0
743965: Mycoplasma putrefaciens KS1	0	0	0	8	19	0	0	0	0	0	0	0	0	0	1	0	0	0	0	0	0	0	0	0	4	1	2	0	0	0	3	0	0	0	0	1	3	6	0	0	0	0	0	0	0	0	0	0	19
743967: Mycoplasma yeatsii GM274B	0	0	0	1	5	0	2	4	1	1	3	2	0	0	3	3	1	2	2	0	0	1	2	0	1	1	2	1	0	0	0	0	0	0	0	0	1	1	0	0	0	0	0	0	0	1	0	3	2
76831: Myroides	10	160	62	2	76	0	35	95	118	34	4	61	5	354	441	26	0	36	16	3	274	0	395	236	309	8	203	205	14	54	5	0	3	9	6	33	350	18	6	7	5	5	1003	295	287	9	32	28	94
76832: Myroides odoratimimus	2	5	1	0	44	0	2	16	25	4	321	12	1	20	9	96	18	0	89	0	7	0	13	8	9	5	8	5	0	49	93	0	1	2	13	1	35	5	0	0	0	0	12	10	13	5	0	6	1
929704: Myroides odoratus DSM 2801	0	1	2	0	10	0	0	2	0	0	6	4	1	1	0	7	0	25	2	0	1	0	1	47	0	0	0	0	0	15	0	0	0	0	0	0	24	1	0	1	0	0	1	3	0	18	0	10	0
480520: Myroides profundi	1	0	2	5	26	0	2	2	13	1	3	10	8	0	0	1	4	3	2	0	0	0	3	3	7	0	8	0	0	0	0	1	1	1	3	0	3	2	3	1	0	0	1	3	0	9	0	2	9
1583100: Myroides sp. A21	10	3	8	14	97	0	23	178	19	5	15	87	3	105	43	38	0	24	20	0	18	0	125	35	22	10	22	41	4	23	2	1	4	30	3	1	73	16	10	10	3	2	27	24	23	19	0	45	0
1458492: Myroides sp. ZB35	2	5	0	0	3	0	2	3	4	1	17	0	0	8	5	4	0	0	0	4	10	9	2	9	6	0	20	0	2	8	3	0	0	2	0	1	6	1	0	0	0	0	2	4	4	0	1	5	0
31: Myxococcaceae	0	0	1	0	0	0	0	0	1	0	0	0	0	0	0	0	0	0	0	0	0	0	0	0	0	0	0	0	0	0	0	0	0	0	0	0	0	3	0	0	0	0	0	0	0	0	0	0	0
32: Myxococcus	0	0	1	3	2	0	0	0	0	0	5	0	2	0	0	0	0	0	0	0	1	0	3	0	0	0	1	0	0	0	0	0	0	0	0	0	0	1	0	0	0	0	0	0	4	0	0	1	0
246197: Myxococcus xanthus DK 1622	0	0	0	0	0	0	0	0	1	0	0	1	1	2	0	0	2	0	0	0	0	1	1	0	0	0	0	0	0	0	0	0	0	0	1	1	0	1	0	0	0	0	0	0	0	0	0	0	0
479431: Nakamurella multipartita DSM 44233	0	1	0	0	5	1	8	1	5	7	10	3	2	3	6	6	0	2	8	0	0	0	38	8	0	1	0	0	0	0	0	1	1	0	1	1	0	3	2	5	0	0	0	10	2	1	0	5	5
457570: Natranaerobius thermophilus JW/NM-WN-LF	0	1	0	5	4	0	0	1	7	2	1	1	1	4	0	0	0	0	0	0	0	0	0	2	0	0	0	2	0	0	0	0	0	1	0	0	0	2	0	0	1	0	0	5	3	0	0	0	1
1064592: Naumovozyma castellii CBS 4309	0	1	1	0	0	0	3	0	0	4	1	202	2	0	0	0	15	1	8	1	0	0	44	17	1	2	0	369	640	0	1	0	1	0	1	0	0	43	3	0	140	40	1	0	1	0	26	1	729
1871025: Ndongobacter massiliensis	1	1	0	8	8	1	3	1	5	7	15	8	5	1	3	0	0	0	1	2	0	0	2	0	1	3	1	0	0	0	0	0	2	0	0	1	0	4	0	0	0	0	4	2	0	0	0	23	10
1702287: Negativicoccus massiliensis	28	62	89	203	435	3	127	79	141	42	115	135	40	12	52	72	66	28	8	19	5	12	53	31	125	20	38	81	9	7	2	15	43	11	1	5	72	177	26	30	3	2	71	75	8	98	9	201	282
909932: Negativicutes	396	762	958	958	3151	11	65	1061	574	254	1386	1589	66	1270	251	842	630	696	8	219	884	221	2881	2151	3621	1526	651	675	444	4145	321	12	479	662	570	370	685	1252	676	970	12	7	63	122	282	275	46	63	5355
482: Neisseria	3419	25846	7939	7165	69033	8154	17223	87203	17345	28811	34139	75172	11007	92107	7970	22010	10	29254	156153	5036	14392	1868	74189	18480	27769	1360	61207	22719	8758	97984	68390	1257	9014	5445	20479	16702	48779	61893	487	2268	1643	96	108312	21643	44394	2693	3366	15690	4978
546263: Neisseria elongata subsp. glycolytica ATCC 29315	114	711	171	75	4546	40	1184	35645	833	1049	891	1531	368	1109	188	3613	0	602	2247	417	332	45	2485	2137	612	135	852	570	42	601	137	26	140	344	1108	324	745	160	37	108	48	1	2409	534	1051	175	302	1989	27
485: Neisseria gonorrhoeae	70	932	97	26	1102	170	490	3067	627	834	709	1141	799	1625	115	819	2	782	1440	98	260	86	1305	491	2035	72	2975	626	114	627	1063	8	284	19	1105	277	922	744	10	23	30	6	1467	739	1155	16	100	1267	50
242231: Neisseria gonorrhoeae FA 1090	2	21	3	0	17	0	6	144	4	8	6	12	8	52	1	18	0	32	11	5	5	0	10	4	48	1	55	5	0	15	4	0	11	0	10	17	35	21	0	0	0	0	86	0	29	0	10	19	0
528354: Neisseria gonorrhoeae MS11	1	9	1	0	17	0	2	41	5	8	6	0	0	16	0	16	0	4	11	0	1	0	17	1	16	0	4	3	0	10	4	0	0	1	9	1	0	3	0	0	1	0	46	11	31	0	0	2	1
521006: Neisseria gonorrhoeae NCCP11945	0	5	1	0	27	0	2	32	8	9	10	1	1	6	11	17	0	17	11	0	2	0	64	1	14	0	10	0	1	39	3	1	2	0	8	1	3	2	0	1	0	0	201	1	18	0	1	4	1
486: Neisseria lactamica	25	2058	51	4	495	10	107	2699	1541	310	310	236	50	2101	70	366	0	277	134	81	45	19	545	98	414	46	341	88	11	254	106	2	40	3	211	40	58	80	8	3	38	1	605	307	449	8	57	357	21
489653: Neisseria lactamica 020-06	18	149	10	4	173	4	77	972	52	112	130	78	34	317	10	226	0	45	201	30	38	6	282	51	206	17	101	19	3	80	123	4	26	4	61	30	40	50	3	6	4	0	576	82	168	2	18	130	6
487: Neisseria meningitidis	304	4421	479	198	8761	146	3406	31248	4771	4539	8565	18516	2311	9843	1268	6584	0	2589	37280	1383	2551	554	12774	4568	12470	345	5307	1549	369	11475	16492	149	3382	351	10320	4512	3081	3687	39	103	184	15	12503	4224	10029	163	527	3046	434
374833: Neisseria meningitidis 053442	5	53	6	0	71	1	8	420	48	61	53	35	12	71	3	71	0	27	25	10	102	7	79	13	74	1	93	25	4	55	12	0	8	1	45	5	14	17	1	0	1	0	60	38	219	1	3	26	12
604162: Neisseria meningitidis 8013	2	28	5	0	20	0	5	96	31	7	30	9	4	20	0	28	0	9	17	3	6	1	47	7	32	1	39	8	0	11	10	0	3	0	22	2	10	4	0	2	0	0	35	17	27	1	2	10	1
935599: Neisseria meningitidis G2136	0	14	2	1	6	0	2	51	12	6	21	5	5	50	2	3	0	3	20	1	5	0	11	0	17	0	12	1	1	17	19	1	9	0	6	1	3	15	0	0	0	0	47	3	37	0	0	2	0
909420: Neisseria meningitidis H44/76	1	21	2	0	14	0	8	56	49	18	22	22	5	22	0	24	0	14	12	7	10	0	248	2	23	1	34	3	3	8	16	0	9	0	27	6	7	5	0	2	3	0	46	5	94	0	1	7	0
1386087: Neisseria meningitidis LNP21362	0	15	0	0	19	0	10	66	20	4	12	5	2	26	0	6	0	5	13	0	10	0	22	10	29	1	4	1	0	23	6	0	14	0	7	8	5	9	0	0	0	0	36	8	37	0	4	5	1
935591: Neisseria meningitidis M01-240149	0	31	1	0	6	1	13	35	7	29	32	11	2	142	0	24	0	5	7	0	11	1	15	6	8	1	15	0	2	17	26	0	6	0	6	11	2	1	0	2	0	0	26	5	22	0	0	3	3
935588: Neisseria meningitidis M01-240355	1	26	1	0	34	0	8	59	31	21	17	4	8	31	4	50	0	10	14	4	9	1	26	14	36	1	32	6	1	17	5	1	1	0	11	4	2	6	0	0	0	0	44	18	30	0	0	9	1
935593: Neisseria meningitidis M04-240196	1	62	8	0	48	0	17	180	45	27	66	19	2	62	0	52	0	8	21	22	23	4	29	9	75	0	37	10	1	92	11	1	7	5	26	6	15	26	0	0	1	0	155	30	58	1	1	12	2
935590: Neisseria meningitidis M0579	0	14	0	0	12	5	22	46	7	9	28	9	3	47	2	20	0	35	9	2	2	0	17	8	15	1	20	1	0	9	13	0	7	1	10	25	4	1	1	0	1	0	33	9	24	0	2	17	6
122586: Neisseria meningitidis MC58	0	12	0	0	16	1	0	44	2	6	2	4	6	20	1	10	0	6	17	2	2	0	24	1	12	3	3	0	0	24	2	0	3	0	6	1	3	4	0	0	0	0	33	5	9	0	0	3	1
935589: Neisseria meningitidis NZ-05/33	0	18	1	0	8	0	1	42	5	8	26	5	0	37	0	12	0	14	24	0	10	1	9	2	37	0	22	1	0	10	16	0	1	1	16	2	1	3	0	0	3	0	21	7	27	0	0	3	1
942513: Neisseria meningitidis WUE 2594	1	17	0	0	11	0	13	57	24	5	400	3	2	33	0	44	0	4	17	1	13	0	44	1	13	0	7	8	1	10	10	0	12	0	7	4	7	7	0	0	0	0	21	22	12	0	0	5	4
122587: Neisseria meningitidis Z2491	1	21	2	0	24	2	2	71	8	27	34	7	1	38	3	39	0	5	60	2	6	0	21	2	15	2	13	4	2	18	5	0	3	0	18	4	4	5	0	1	0	0	98	16	7	0	0	10	1
662598: Neisseria meningitidis alpha14	2	60	5	1	28	0	15	95	31	29	39	17	7	63	4	45	0	21	18	4	7	0	82	7	82	2	42	1	4	29	7	0	6	1	19	4	7	14	3	0	2	0	85	45	35	1	2	29	2
630588: Neisseria meningitidis alpha710	1	13	0	0	13	0	3	59	14	14	35	4	4	19	1	15	0	2	19	1	2	1	15	4	18	1	7	3	0	27	7	0	1	0	26	4	4	3	0	0	1	0	42	13	9	0	5	9	1
491: Neisseria meningitidis serogroup B	0	10	2	0	26	0	4	84	2	7	9	11	0	2	0	27	0	0	1	0	15	1	2	2	18	0	5	1	0	1	0	0	2	0	6	0	0	10	0	0	0	0	18	0	13	0	0	14	1
135720: Neisseria meningitidis serogroup C	0	0	0	0	0	0	0	0	3	0	0	0	0	0	0	0	0	0	0	0	1	1	1	0	0	0	0	0	0	0	0	0	0	0	0	0	0	7	0	0	0	0	2	0	0	0	0	0	0
490: Neisseria sicca	241	12328	511	88	15149	50	4308	38478	4430	6591	6716	2373	330	10615	510	9180	1	2371	8415	1008	2086	294	6520	2129	3684	1951	16115	1353	90	1819	2780	59	499	77	2161	472	1160	589	87	186	163	4	12488	7498	3413	277	615	9374	175
28091: Neisseria weaveri	107	2053	279	122	2785	67	766	7417	1325	1697	4730	853	298	3503	382	1341	1	843	2830	212	777	75	1928	343	2394	55	1392	370	181	2368	1499	30	769	125	1295	419	1243	1833	13	128	32	3	769	1030	1385	81	90	1123	153
481: Neisseriaceae	408	2683	614	714	13681	1559	2580	23244	7428	2111	7409	5659	1538	7223	1754	4036	0	1523	12227	495	669	176	8838	1660	4131	277	4710	1721	457	4457	4318	112	2365	458	4904	2256	2728	31231	30	146	158	45	3929	2792	2891	215	443	2699	1072
206351: Neisseriales	242	2014	202	335	2448	214	1676	7963	1747	1094	3543	1114	785	3654	344	2547	0	1981	10681	662	677	99	3434	1073	3408	138	4394	885	107	1810	619	86	596	268	1684	480	827	789	15	286	53	7	12653	606	3427	84	295	1468	464
556325: Neomicrococcus aestuarii	11	4	6	42	61	32	23	54	17	4	56	25	12	3	44	11	2	14	26	6	15	5	3	280	53	4	25	11	6	94	2	17	4	2	1	21	15	36	10	5	3	32	4	37	3	36	51	6	24
367110: Neurospora crassa OR74A	3	57	20	9	14	21	12	22	11	16	38	11	17	3	7	57	24	27	51	15	6	4	45	9	39	76	23	51	6	0	3	0	1	0	7	7	3	12	6	2	3	3	43	78	8	8	6	56	58
749222: Nitratifractor salsuginis DSM 16511	0	0	0	1	0	0	0	0	0	1	0	0	0	0	0	0	0	0	1	0	0	0	2	1	0	0	0	0	0	0	0	0	0	1	0	0	0	6	0	0	0	0	0	0	0	0	0	0	2
387092: Nitratiruptor sp. SB155-2	1	0	0	0	1	0	3	0	0	0	0	1	0	0	1	0	0	0	0	0	0	0	0	0	0	3	0	0	0	0	0	0	0	0	1	0	1	1	0	0	0	1	0	0	0	0	0	0	1
472759: Nitrosococcus halophilus Nc 4	0	1	0	0	3	0	0	6	0	1	0	0	0	1	0	1	0	1	0	0	0	0	0	0	0	0	2	0	0	0	0	0	0	1	2	0	0	1	0	0	0	0	0	1	1	0	0	0	0
914: Nitrosomonas	0	49	25	0	32	0	25	0	0	24	5	56	13	0	0	354	0	10	510	2	129	0	227	11	0	0	17	29	1	0	0	1	0	0	28	0	498	90	0	0	0	2	1	3	1	7	0	6	0
335283: Nitrosomonas eutropha C91	2	40	157	6	40	0	73	112	125	12	59	177	246	0	10	1842	1	8	2404	23	176	5	406	51	4	0	24	190	18	89	140	0	7	23	24	4	1718	309	0	0	28	0	306	316	109	14	0	3	0
44577: Nitrosomonas ureae	0	9	1	1	0	0	1	1	0	0	2	1	0	0	0	1	0	0	0	0	0	0	0	0	0	1	0	1	0	0	0	0	0	0	0	0	2	1	0	0	0	0	0	0	0	0	0	1	0
1266925: Nitrosospira briensis C-128	0	5	0	0	0	0	4	5	25	8	4	1	4	1	2	28	0	1	8	2	10	0	10	3	9	1	7	3	3	2	3	0	5	3	1	1	18	20	0	1	1	0	10	7	3	2	12	9	3
323848: Nitrosospira multiformis ATCC 25196	0	0	1	0	2	0	13	0	2	0	0	4	1	0	1	43	0	3	26	0	2	0	15	0	1	0	0	5	0	2	0	0	0	0	1	0	40	6	0	0	0	0	6	2	1	2	1	0	0
1817: Nocardia	0	4	0	5	1	0	1	1	1	0	0	1	0	2	19	0	0	0	0	0	0	0	2	2	0	9	2	6	0	1	0	0	0	0	0	0	0	3	0	1	0	0	0	0	0	0	4	0	2
1133849: Nocardia brasiliensis ATCC 700358	3	0	1	0	7	0	25	3	0	8	7	13	0	1	2	0	0	0	0	0	0	0	0	1	2	1	1	0	0	0	0	0	0	0	0	0	2	3	0	3	0	0	5	3	0	0	0	1	29
37329: Nocardia farcinica	0	0	1	2	2	0	1	0	0	3	1	1	0	1	0	1	3	0	1	0	1	0	2	0	0	1	0	0	0	0	0	1	0	1	0	0	0	1	0	0	0	0	0	0	0	0	2	0	2
1415166: Nocardia nova SH22a	0	1	1	13	3	1	0	9	1	0	2	12	0	5	3	4	1	0	4	5	2	0	1	5	0	4	3	5	0	1	1	13	0	0	0	0	0	3	1	2	0	5	0	2	1	13	0	2	19
37332: Nocardia seriolae	1	0	1	1	23	0	0	3	5	3	0	7	0	3	1	0	2	0	4	0	0	0	2	3	0	1	0	1	0	0	1	0	1	1	0	0	0	2	3	2	1	0	0	1	0	0	0	2	1
134962: Nocardia soli	3	0	2	5	15	1	6	8	1	9	4	3	5	12	9	11	0	1	10	2	2	1	4	4	1	10	2	1	1	7	3	0	1	4	4	0	13	3	0	0	0	4	0	0	11	3	3	5	4
85025: Nocardiaceae	1	0	0	0	24	0	0	5	1	4	0	4	0	1	0	1	0	0	0	2	0	0	5	0	0	3	1	1	0	1	0	0	1	1	1	0	1	3	0	0	0	1	1	0	1	2	4	2	3
1839: Nocardioides	1	0	2	6	36	1	5	2	1	2	4	12	2	13	2	1	0	0	2	1	2	0	52	13	6	4	1	0	1	2	1	0	5	7	1	1	15	5	0	0	0	1	3	0	1	2	3	0	6
1300347: Nocardioides dokdonensis FR1436	5	3	7	29	91	2	10	19	19	15	20	52	7	12	28	6	9	4	4	3	6	2	14	18	12	8	10	4	4	4	19	2	24	5	7	1	17	27	3	30	1	1	0	7	4	3	4	19	24
110319: Nocardioides sp. CF8	4	1	2	12	11	2	1	1	6	0	2	9	1	3	0	19	0	2	6	1	0	0	8	3	3	2	1	0	0	1	1	3	0	0	0	0	3	3	4	3	0	0	0	3	2	1	1	8	7
196162: Nocardioides sp. JS614	48	4	88	61	312	2	46	25	106	109	46	424	51	34	39	30	0	20	9	17	11	5	27	56	30	3	21	63	4	3	18	12	13	8	1	3	14	32	5	37	4	2	0	102	3	5	6	16	547
2013: Nocardiopsis	2	0	6	19	145	0	0	1	1	7	0	11	2	1	0	0	2	2	1	0	1	0	3	2	1	0	1	0	0	0	0	0	1	0	0	0	0	6	0	0	0	0	0	0	0	13	0	7	39
1205910: Nocardiopsis alba ATCC BAA-2165	4	0	0	0	44	0	3	9	10	3	6	9	3	3	1	12	1	3	6	0	2	0	0	7	4	6	0	7	2	0	0	0	1	3	0	0	10	3	1	4	0	2	5	7	0	21	9	11	6
2014: Nocardiopsis dassonvillei	4	2	2	11	18	0	3	2	13	4	1	28	21	2	2	0	1	0	2	0	0	7	2	15	2	6	6	3	1	0	0	4	2	0	3	2	6	7	0	1	1	0	0	4	1	3	0	2	8
446468: Nocardiopsis dassonvillei subsp. dassonvillei DSM 43111	9	2	7	81	15	1	5	27	37	20	20	36	13	4	2	13	3	12	31	3	5	7	7	67	12	13	8	5	1	22	10	10	5	26	2	17	13	19	3	1	16	5	12	9	3	5	59	4	17
313624: Nodularia spumigena CCY9414	0	0	1	0	0	0	0	2	0	0	0	0	0	3	1	0	1	1	0	0	0	0	1	0	1	4	0	8	0	0	0	0	0	0	0	0	3	1	0	0	0	0	0	0	0	0	0	0	0
63737: Nostoc punctiforme PCC 73102	0	0	0	4	1	0	0	0	0	1	2	4	1	0	2	1	0	0	1	0	0	0	3	0	9	3	0	0	0	1	0	0	0	0	0	0	1	9	0	0	0	0	0	0	0	0	0	0	0
1162: Nostocaceae	1	0	0	0	2	1	5	1	0	4	4	4	0	0	0	1	0	2	0	3	1	1	0	1	2	0	0	5	1	1	0	0	1	0	0	0	3	1	1	1	0	0	0	1	4	1	0	3	5
1161: Nostocales	0	7	0	0	4	0	1	11	3	2	1	0	0	3	0	3	1	1	1	2	0	0	2	4	0	0	3	0	1	0	0	0	0	0	0	0	4	10	2	0	0	0	0	0	2	4	0	28	4
702113: Novosphingobium sp. PP1Y	0	3	1	0	1	1	5	0	0	0	1	0	0	0	0	1	0	0	0	2	0	0	1	0	0	0	0	0	2	0	1	0	0	0	0	1	0	1	0	0	0	2	0	2	0	0	0	0	0
511062: Oceanimonas sp. GK1	0	1	0	1	3	0	0	2	1	0	0	3	0	9	1	3	0	2	1	2	0	0	0	1	1	0	2	0	2	1	0	0	0	0	0	0	1	7	0	0	0	0	0	1	2	0	6	4	0
221109: Oceanobacillus iheyensis HTE831	2	0	0	1	0	0	0	1	0	0	0	2	0	0	2	0	0	0	0	0	0	0	2	1	3	0	0	1	0	0	0	0	0	0	2	0	1	1	0	4	0	0	1	0	0	0	0	0	0
1238184: Oceanobacillus kimchii X50	0	0	0	1	1	0	0	0	1	0	1	1	0	1	0	0	0	0	0	0	0	0	2	0	0	0	0	0	0	0	0	1	0	0	0	0	0	1	0	0	0	0	0	0	0	0	0	0	2
709991: Odoribacter splanchnicus DSM 20712	13	43	34	442	306	2	87	41	164	31	84	299	70	108	65	90	35	43	77	10	95	22	64	30	112	133	23	58	6	170	16	0	18	9	15	3	198	100	7	19	3	1	23	35	50	5	1	41	232
1045004: Oenococcus kitaharae DSM 17330	0	0	0	0	0	0	0	0	0	1	0	3	0	0	0	1	0	0	0	0	0	0	0	0	0	0	0	0	0	0	0	0	0	0	1	0	0	1	0	0	0	0	0	0	0	0	0	0	2
203123: Oenococcus oeni PSU-1	0	0	1	1	11	0	2	1	14	0	0	1	0	0	6	0	1	1	0	0	0	0	0	3	3	0	0	0	0	0	0	0	0	0	0	0	4	30	0	0	0	0	0	2	0	4	0	1	1
871575: Ogataea parapolymorpha DL-1	0	2	0	0	0	0	0	0	0	2	1	3	0	0	0	2	1	0	0	1	0	0	3	0	0	0	0	1	1	0	0	0	0	0	1	0	0	7	1	0	1	2	0	0	0	0	1	0	0
698738: Oleispira antarctica RB-8	0	3	0	0	6	0	0	8	2	4	2	0	1	0	0	5	0	2	0	1	2	0	1	0	5	0	0	2	0	1	0	0	0	0	0	0	0	1	0	0	0	0	12	1	5	0	0	0	1
133925: Olsenella	14	52	7	52	117	50	60	54	17	197	92	15	68	4	22	3	54	4	10	5	3	0	42	3	41	81	113	50	15	0	1	2	4	18	7	0	101	72	13	39	4	9	0	9	1	1	6	194	131
1805478: Olsenella sp. Marseille-P2300	35	12	13	166	145	27	110	29	42	78	102	275	116	8	33	6	83	39	52	14	11	4	39	63	69	77	112	34	7	4	16	44	32	22	16	3	45	253	93	27	7	33	1	66	0	46	30	71	132
712411: Olsenella sp. oral taxon 807	169	6	493	55	8799	3997	54	1506	1750	159	335	452	746	0	274	5	918	476	865	388	78	8	587	9	582	18589	267	3514	119	18	15	45	32	82	22	16	837	667	5	1186	52	832	28	4	84	66	731	74	9
633147: Olsenella uli DSM 7084	45	11	57	124	169	761	137	28	58	65	63	154	309	14	47	14	149	68	167	28	23	30	70	80	72	824	101	51	24	8	19	113	76	62	39	8	267	243	111	68	45	73	15	52	5	33	58	81	108
452637: Opitutus terrae PB90-1	0	0	0	0	0	0	0	0	0	0	0	0	0	0	0	0	0	0	0	0	0	0	0	0	0	0	0	0	0	3	0	0	0	0	1	0	0	1	0	0	0	0	0	0	1	0	1	0	0
28251: Ornithobacterium rhinotracheale	0	5	6	29	9	0	5	8	4	2	5	4	5	14	0	9	0	2	0	2	3	1	1	2	3	6	79	1	0	5	0	0	0	0	0	0	7	8	3	0	0	1	0	6	11	0	0	17	2
867902: Ornithobacterium rhinotracheale DSM 15997	3	8	21	27	24	2	5	82	8	4	13	96	3	90	25	14	6	19	59	4	110	2	69	15	18	33	7	28	18	22	21	4	1	2	5	15	99	5	3	7	0	0	10	12	20	5	2	9	25
1401325: Ornithobacterium rhinotracheale ORT-UMN 88	94	139	28	61	125	0	136	2146	194	141	1019	415	137	453	350	516	18	29	412	105	841	13	143	57	122	14	317	97	15	93	58	0	5	5	58	14	93	18	7	1	4	0	33	70	298	32	22	92	189
179408: Oscillatoria nigro-viridis PCC 7112	0	0	0	3	0	6	2	14	2	2	13	1	0	3	0	2	0	1	0	28	0	2	1	2	0	18	0	1	0	1	0	0	0	0	0	3	0	10	4	1	0	2	0	10	0	6	3	3	8
1150: Oscillatoriales	1	1	0	1	1	3	1	2	0	0	0	1	1	1	0	3	0	4	0	0	0	0	0	1	0	1	1	0	1	0	0	0	0	0	0	2	0	5	1	2	1	0	0	1	0	1	0	0	3
864702: Oscillatoriales cyanobacterium JSC-12	0	0	0	0	0	0	0	0	0	0	0	0	0	0	0	2	0	1	3	0	0	0	1	0	1	1	0	1	0	0	0	0	0	0	0	0	0	1	0	0	0	0	0	0	0	0	0	0	0
1301283: Oscillatoriophycideae	0	0	0	1	0	0	0	0	0	1	1	0	0	0	0	1	0	0	0	1	0	0	0	0	0	0	7	1	0	0	0	0	0	0	0	0	0	3	0	0	0	1	0	0	0	2	0	5	2
693746: Oscillibacter valericigenes Sjm18-20	1	1	4	3	12	0	2	1	2	0	0	4	0	0	3	3	1	2	0	0	0	0	0	0	3	0	0	8	1	2	1	0	1	1	0	1	2	6	0	0	0	0	0	2	0	0	0	3	5
926562: Owenweeksia hongkongensis DSM 17368	1	8	10	4	6	0	6	49	1	3	14	9	2	18	9	12	0	5	2	4	12	0	11	7	6	1	11	8	0	27	2	0	4	0	24	0	4	20	0	0	0	0	2	11	14	1	0	5	14
75682: Oxalobacteraceae	1	53	16	8	8	16	17	30	22	20	11	11	10	4	1	456	3	18	6	25	2	6	29	45	8	10	31	16	38	21	9	1	8	52	36	14	19	14	14	1	1	2	34	322	20	1	15	3	16
643674: Paenalcaligenes hominis	1	18	0	1	2	1	2	5	1	5	1	11	2	0	0	6	0	0	10	0	2	0	4	0	6	0	2	1	0	0	0	2	0	0	0	0	4	5	0	0	0	0	1	4	1	0	0	1	5
186822: Paenibacillaceae	0	3	0	0	1	1	0	1	1	1	1	1	0	2	13	0	0	2	0	0	0	0	2	1	1	0	0	0	0	0	0	0	6	0	0	0	4	7	2	0	0	0	1	24	0	0	0	20	2
44249: Paenibacillus	37	77	13	109	491	10	230	337	448	66	365	372	74	310	180	529	35	31	318	5	25	7	116	147	95	10	22	43	57	25	162	63	20	89	96	46	152	121	8	40	24	4	23	19	141	12	28	69	213
1616788: Paenibacillus bovis	0	0	0	0	3	0	1	0	2	0	5	1	0	2	0	0	0	1	0	0	1	0	2	1	0	3	2	2	0	0	0	1	0	1	0	0	0	1	0	2	0	0	0	1	1	0	0	6	8
44251: Paenibacillus durus	0	0	0	0	0	0	0	0	0	0	0	0	0	0	0	0	0	0	0	0	0	0	0	0	0	0	0	2	0	0	0	0	0	0	0	0	0	1	0	0	0	0	0	0	0	1	0	0	2
147375: Paenibacillus larvae subsp. larvae	0	1	0	0	4	0	1	4	0	1	2	3	0	0	7	1	0	2	1	0	0	0	0	0	1	5	1	0	0	0	0	0	0	2	0	3	0	2	0	0	0	0	0	0	0	0	0	1	7
1477: Paenibacillus larvae subsp. pulvifaciens	4	2	0	23	28	0	5	3	6	10	17	4	4	2	17	3	2	1	42	0	0	0	8	5	14	0	1	2	0	3	0	6	0	11	0	0	17	26	0	1	0	0	1	2	0	0	1	2	5
61624: Paenibacillus mucilaginosus	0	0	1	2	0	0	0	0	2	0	3	0	1	0	0	0	0	0	0	0	0	0	0	0	0	0	0	0	0	0	0	0	0	0	0	0	0	1	0	0	0	0	0	0	0	0	0	0	0
1116391: Paenibacillus mucilaginosus 3016	0	1	1	35	0	0	0	0	77	0	0	0	0	1	0	0	0	1	0	1	27	0	0	0	51	11	1	1	30	0	16	1	6	31	4	0	3	69	0	56	0	0	2	1	9	0	1	23	15
162209: Paenibacillus naphthalenovorans	0	0	0	13	18	0	1	8	12	3	43	8	2	9	4	1	2	2	0	0	0	0	1	19	0	0	13	0	0	0	1	0	0	0	0	1	1	1	0	0	0	0	0	9	1	0	0	3	5
1695218: Paenibacillus sp. 32O-W	2	0	1	0	6	1	1	0	4	0	0	1	4	0	5	0	2	0	4	1	0	0	0	0	0	4	2	4	0	0	0	0	0	1	0	1	6	1	1	5	0	3	0	1	1	0	0	0	0
1536769: Paenibacillus sp. FSL P4-0081	1	4	1	2	6	0	0	6	2	0	0	1	0	1	0	0	0	0	2	0	0	0	2	0	0	9	0	0	3	3	0	0	0	4	0	0	39	1	0	0	0	0	0	0	0	0	0	0	1
1763538: Paenibacillus sp. LPB0068	0	0	0	0	4	0	1	2	1	2	3	5	2	0	1	1	0	5	0	0	0	0	0	4	5	0	1	0	0	1	0	0	1	0	0	0	0	3	0	1	0	0	0	1	0	2	0	0	3
1462996: Paenibacillus yonginensis	2	2	2	21	32	0	4	15	16	5	56	51	9	12	13	6	1	24	3	3	2	2	9	12	9	8	20	21	4	6	0	2	1	3	7	4	27	1	2	0	7	0	6	2	14	0	0	63	10
694427: Paludibacter propionicigenes WB4	0	12	358	58	58	35	5	68	79	23	13	178	4	163	61	6	355	23	39	83	8	0	20	61	15	574	10	141	8	18	1	0	3	8	3	0	99	35	32	95	6	4	11	36	171	1	0	29	10
1387353: Paludisphaera borealis	0	1	1	2	1	4	3	0	1	1	1	0	0	0	0	0	0	0	0	0	0	2	0	0	0	1	1	2	0	0	1	0	0	0	1	0	2	1	0	0	0	0	2	3	2	0	2	1	2
93217: Pandoraea	0	1	0	1	3	0	4	5	0	0	1	0	3	1	1	12	0	9	9	2	2	0	16	3	9	0	2	0	0	0	0	0	0	0	2	0	7	2	2	1	0	0	3	3	1	2	0	2	1
573737: Pandoraea oxalativorans	0	0	0	0	0	0	0	0	0	2	2	8	0	0	0	0	0	2	0	0	0	0	1	0	0	0	0	0	0	0	0	0	0	0	0	0	1	67	0	0	0	0	1	0	0	0	0	0	0
1416914: Pandoraea pnomenusa 3kgm	0	0	0	0	2	0	0	1	0	0	0	19	0	0	0	1	0	0	0	0	0	0	0	1	0	0	0	0	0	0	0	0	0	0	0	0	0	1	0	0	0	0	2	0	0	0	0	0	0
445709: Pandoraea thiooxydans	0	0	0	0	2	0	0	4	1	0	2	0	1	1	1	0	0	0	0	0	0	0	0	0	0	0	0	1	0	0	0	0	0	0	2	0	2	1	0	0	0	1	0	2	0	0	0	1	0
53335: Pantoea	0	0	0	0	0	0	0	0	0	0	0	0	0	1	0	0	0	1	1	0	0	0	1	3	0	0	0	4	48	0	0	0	1	0	0	0	0	4	0	0	1	11	0	0	0	0	1	0	6
706191: Pantoea ananatis LMG 20103	0	1	1	0	1	0	0	1	2	1	0	0	0	3	0	0	0	0	0	0	0	0	0	1	1	0	1	0	2	0	1	0	0	0	0	0	0	1	0	0	0	0	1	0	0	0	0	0	0
1076550: Pantoea rwandensis	0	0	0	0	0	0	0	0	0	0	0	0	0	0	0	0	0	0	0	0	0	0	0	0	0	0	0	1	0	0	0	0	0	0	0	0	0	1	0	0	0	0	0	0	1	0	0	0	0
1484157: Pantoea sp. PSNIH2	0	0	0	0	0	0	0	1	0	2	0	1	0	0	1	0	0	0	3	0	0	0	1	0	0	1	0	0	0	0	0	0	1	0	0	0	0	5	0	0	0	0	0	0	0	0	0	1	0
435591: Parabacteroides distasonis ATCC 8503	52	1006	205	1193	783	51	998	845	707	298	905	3974	314	2131	5053	1805	234	130	380	213	429	71	554	147	458	676	473	1867	467	374	427	13	64	196	459	273	718	166	23	119	27	40	772	397	295	1	89	673	903
1834200: Parabacteroides sp. YL27	59	120	257	1252	1840	17	2321	234	857	514	1101	2801	1465	316	431	762	40	133	1723	33	339	203	285	951	1647	86	96	94	90	1243	212	238	259	159	125	77	488	1085	227	27	68	6	59	150	72	36	15	487	1416
398527: Paraburkholderia phytofirmans PsJN	0	0	0	1	0	0	1	2	0	0	1	1	1	0	0	0	0	0	0	1	0	0	0	0	0	0	0	1	0	0	1	0	0	0	0	0	0	1	0	0	0	0	1	0	2	0	0	0	0
882378: Paraburkholderia rhizoxinica HKI 454	0	4	0	0	2	0	2	8	8	1	1	15	8	0	0	15	0	2	1	5	4	1	8	4	7	0	1	0	0	0	0	0	0	0	7	1	6	15	0	0	0	0	3	2	3	0	0	0	0
1367847: Paracoccus aminophilus JCM 7686	5	3	3	0	0	0	0	0	0	0	0	0	0	0	0	0	1	0	0	2	0	0	0	0	0	1	0	1	0	0	0	0	0	1	1	0	9	8	4	5	7	7	1	0	1	0	1	2	2
318586: Paracoccus denitrificans PD1222	0	0	0	0	0	0	3	0	0	1	0	1	0	1	0	0	0	1	1	1	0	0	0	0	1	0	0	0	0	0	0	0	2	0	1	0	0	1	1	0	0	0	1	1	0	0	0	1	0
634956: Parageobacillus thermoglucosidasius C56-YS93	0	1	4	1	0	0	1	3	0	0	0	0	0	0	4	0	0	0	0	0	0	0	0	0	0	0	0	0	0	0	0	0	1	0	0	0	0	1	0	0	1	0	0	0	0	1	0	0	0
1129794: Paraglaciecola psychrophila 170	0	0	1	0	0	0	0	1	0	1	0	3	1	0	1	0	0	0	0	1	0	0	1	0	0	0	0	0	0	0	0	0	0	0	0	0	0	1	0	0	0	0	0	0	3	0	0	0	0
545619: Paraoerskovia marina	10	1	0	7	40	0	7	2	14	10	7	35	2	3	5	0	0	2	4	1	1	0	1	5	1	5	7	4	0	0	3	2	3	0	1	0	5	5	6	31	1	0	0	16	2	1	1	8	54
864564: Parascardovia denticolens DSM 10105 = JCM 12538	8	1	33	9	719	14	5	70	0	120	7	157	216	30	11	54	1416	5	1	5	1	1	234	14	3	175	7	9	5	1	0	16	4	1	1	1	27	5	153	211	39	2	2	9	2	62	41	123	38
33033: Parvimonas micra	187	77	743	886	538	2516	71	50	833	50	212	570	278	427	2679	227	316	5	506	236	50	38	199	127	43	2439	377	884	118	14	106	70	2	10	27	74	111	99	177	232	12	329	382	217	190	35	154	60	70
747: Pasteurella multocida	6	23	17	5	81	1	57	237	103	46	87	66	90	445	105	63	0	5	46	297	178	6	40	69	53	4	59	68	20	11	87	5	14	0	60	48	117	12	2	0	40	1	9	73	168	2	10	39	21
44283: Pasteurella multocida subsp. multocida	1	3	2	0	16	0	5	7	1	4	25	8	56	1	7	7	0	3	5	4	4	1	9	4	10	1	3	4	1	4	0	0	4	1	3	1	6	13	0	2	1	1	0	3	5	1	0	5	3
1132496: Pasteurella multocida subsp. multocida str. HN06	0	0	0	0	2	0	0	1	0	1	2	0	0	1	0	0	0	0	0	1	0	0	4	0	0	0	0	0	0	0	0	0	0	1	0	0	0	1	0	0	0	0	0	0	0	0	0	0	0
1436299: Pasteurella multocida subsp. multocida str. HN07	6	7	0	0	1	0	1	8	4	4	1	2	5	8	6	1	0	3	2	0	4	0	39	11	28	0	0	2	1	1	13	0	15	2	1	0	25	5	4	2	0	0	0	1	1	6	0	1	9
712: Pasteurellaceae	1140	4047	1644	4542	2554	673	2390	14553	3452	4395	8692	14895	10054	8398	8813	6931	11	2011	20067	4403	5855	884	4749	5414	2211	671	4424	2702	701	1577	2161	1472	563	545	3256	6077	11242	2430	51	67	2195	6	3218	5652	9164	999	800	5259	2495
1679001: Pasteurellaceae bacterium NI1060	11	21	9	1	39	1	31	75	8	12	62	72	24	42	21	41	0	2	6	8	27	1	27	18	5	6	22	12	0	11	1	2	0	0	9	9	37	1	0	0	8	0	11	24	39	1	2	19	25
1768242: Paucibacter sp. KCTC 42545	0	7	1	0	3	2	5	12	3	4	1	10	2	1	0	18	0	4	17	3	0	0	7	5	2	0	12	2	2	4	9	1	0	0	2	1	14	3	0	0	3	2	1	25	2	0	2	3	0
1218933: Pectobacterium carotovorum subsp. carotovorum PCC21	0	0	0	0	0	0	1	2	0	0	0	0	0	0	0	1	0	0	0	1	0	0	0	0	0	0	0	1	0	0	0	0	1	0	0	1	1	1	0	0	0	0	0	0	0	0	0	0	0
1253: Pediococcus	19	369	414	117	6457	1	675	109	2553	641	1583	93	195	401	1781	689	70	438	224	209	8	52	189	751	19	245	417	120	2	7	27	4	6	9	2	4	35	153	6	128	115	13	167	33	506	142	164	566	733
1254: Pediococcus acidilactici	1	3	7	9	138	1	26	10	52	9	57	5	10	15	19	15	6	6	2	1	6	0	0	9	14	17	23	6	0	0	0	0	0	2	0	0	60	18	1	11	3	0	2	1	0	3	0	19	17
187452: Pediococcus claussenii	0	1	7	4	28	1	6	10	17	4	8	7	12	11	5	12	5	2	4	0	3	0	0	9	2	7	0	2	0	5	2	13	1	1	0	3	15	5	0	1	0	1	11	4	7	1	1	6	7
1082931: Pelagibacterium halotolerans B2	1	0	0	0	2	0	0	1	0	0	0	0	0	0	0	0	0	0	0	0	0	0	0	1	0	5	0	0	0	0	0	0	0	0	0	0	0	1	0	0	0	0	0	1	1	0	0	0	0
29542: Pelobacter acetylenicus	0	0	0	0	9	0	0	1	1	0	8	12	0	0	0	0	0	0	0	8	0	6	0	0	1	0	1	2	0	0	0	0	0	0	0	0	4	4	0	6	0	1	0	0	0	0	0	2	0
365348: Pelosinus	13	0	3	16	23	0	14	2	19	2	4	4	278	5	2	3	4	19	1	0	6	1	11	12	12	3	10	2	0	0	3	0	9	2	2	0	7	13	1	1	0	0	0	7	2	24	5	4	22
1192197: Pelosinus fermentans JBW45	134	4	48	163	198	1	594	17	127	223	428	513	577	18	162	29	3	272	119	6	18	80	43	72	587	21	63	14	17	83	8	258	25	35	10	4	521	280	30	86	8	87	1	22	3	651	22	291	288
484770: Pelosinus sp. UFO1	4	4	4	79	135	4	1297	31	1203	2	71	73	721	10	38	35	7	31	360	1	36	8	78	22	289	26	28	22	11	5	1	440	89	30	7	14	608	348	23	6	2	31	1	11	9	37	7	1554	163
1286171: Peptoclostridium acidaminophilum DSM 3953	5	5	7	18	20	1	18	7	26	3	20	43	9	2	38	7	2	2	1	3	5	3	5	3	21	3	8	2	0	0	2	0	3	3	1	0	14	44	0	4	2	2	2	5	3	6	2	5	74
186807: Peptococcaceae	9	9	3	18	34	3	5	34	12	64	6	24	5	10	43	4	9	2	9	27	13	0	7	8	17	5	7	4	15	0	2	0	11	1	0	0	22	9	4	3	0	1	1	5	4	0	0	2	12
1570339: Peptoniphilaceae	0	2	1	3	8	8	2	0	20	0	2	16	4	1	1	1	0	0	1	2	0	2	9	3	2	3	15	6	3	1	3	1	0	0	0	0	0	6	1	0	0	10	2	0	1	1	0	0	2
1912856: Peptoniphilus sp. ING2-D1G	3	1	5	39	12	8	3	3	12	4	4	2	1	7	24	1	5	8	18	1	2	0	4	6	11	19	8	6	9	1	7	2	4	3	2	1	6	8	3	0	12	5	10	2	4	0	2	4	28
186804: Peptostreptococcaceae	1	3	2	7	4	3	4	2	6	4	4	4	2	0	3	6	1	0	8	0	0	0	0	0	1	35	6	0	5	0	5	0	0	2	0	8	0	9	3	3	2	0	0	37	2	22	2	4	0
1085624: Persicobacter sp. JZB09	76	192	114	146	298	13	126	1800	190	176	663	484	41	486	528	314	28	110	1076	131	537	19	492	189	227	387	249	135	64	179	106	20	27	207	198	95	458	78	27	123	19	0	245	197	457	72	30	228	123
403833: Petrotoga mobilis SJ95	0	1	8	1	12	0	2	0	1	0	2	1	3	0	0	0	0	0	0	0	0	0	0	0	0	0	0	4	2	0	0	0	0	0	0	0	0	1	0	0	0	0	0	0	0	0	0	2	8
1643949: Petrotogaceae	0	0	0	0	1	0	0	1	1	0	0	0	0	0	0	0	0	0	0	0	0	0	3	0	0	0	0	0	0	0	0	0	0	0	0	0	0	1	0	0	2	0	0	0	0	0	0	0	0
221822: Phaeobacter inhibens	0	0	0	0	1	0	0	0	0	0	1	2	2	0	0	0	0	0	0	0	0	0	0	2	1	0	0	0	0	0	0	1	0	0	0	0	0	3	0	0	0	0	0	0	0	1	0	0	0
1844006: Phaeobacter sp. P97	0	0	0	0	0	0	0	1	0	0	0	0	1	0	0	0	0	0	0	0	0	0	0	0	0	0	0	0	0	0	0	0	0	0	0	0	0	2	4	0	0	0	0	0	0	0	0	0	0
29487: Photorhabdus	0	0	0	0	0	0	4	0	0	0	1	0	0	0	0	0	0	0	0	0	0	0	1	1	0	0	0	1	0	0	0	0	0	0	0	0	0	54	0	0	0	0	0	0	0	0	0	1	0
291112: Photorhabdus asymbiotica	0	0	0	0	0	0	0	0	0	0	0	0	0	0	0	0	2	0	0	0	0	0	0	0	0	0	0	0	0	0	0	0	0	0	0	0	0	1	0	0	0	0	0	2	0	0	0	0	1
243265: Photorhabdus luminescens subsp. laumondii TTO1	0	0	0	6	1	0	1	0	1	3	1	0	0	1	1	0	0	0	1	1	0	1	2	0	1	0	0	2	0	0	0	0	0	0	0	0	0	30	0	3	1	0	0	1	0	0	0	0	0
230089: Photorhabdus temperata subsp. thracensis	0	0	0	0	2	1	1	0	2	0	0	1	0	2	0	1	0	0	0	1	0	0	3	1	0	7	0	1	0	0	0	0	0	0	1	0	0	1	0	1	0	0	0	0	0	0	0	1	2
2045: Pimelobacter simplex	1	1	6	1	55	0	5	5	9	16	5	15	2	3	2	3	0	0	3	0	0	1	6	6	3	4	0	1	0	2	1	0	5	1	1	0	1	1	1	0	0	0	3	4	3	1	0	11	41
1238: Piscirickettsia salmonis	0	11	1	13	3	0	5	20	21	2	1	4	2	3	1	4	0	3	9	0	0	1	40	11	2	2	4	17	2	2	3	2	3	2	3	2	7	21	0	0	6	0	0	3	8	33	4	8	57
1632864: Planctomyces sp. SH-PL14	0	0	0	0	1	0	0	0	0	4	0	0	1	0	1	1	0	1	0	0	0	0	0	0	0	0	0	2	0	0	0	0	0	0	0	0	2	1	1	0	2	0	0	0	0	0	0	0	0
1636152: Planctomyces sp. SH-PL62	1	3	5	1	1	4	0	3	0	3	0	0	0	1	0	0	0	2	0	3	0	0	1	0	0	1	0	4	0	0	0	2	0	1	0	0	1	1	3	1	1	1	5	4	0	0	0	1	0
112: Planctomycetales	1	12	7	2	3	12	10	6	2	351	5	1	2	1	10	1	0	5	0	5	1	3	6	12	4	4	6	13	3	1	0	0	0	1	0	0	3	9	6	3	4	11	3	12	2	2	1	11	7
521674: Planctopirus limnophila DSM 3776	0	2	1	0	0	1	0	1	0	9	0	2	0	1	0	1	0	0	0	0	0	2	0	1	0	1	1	0	0	0	1	0	0	0	0	0	0	1	0	1	0	0	1	1	1	1	0	0	1
666509: Planktomarina temperata RCA23	0	2	0	0	3	0	0	0	1	0	0	0	0	0	0	0	0	0	0	0	0	0	0	0	0	0	0	0	0	1	0	0	0	0	0	0	0	1	0	0	0	0	0	0	0	0	0	2	0
388467: Planktothrix agardhii NIVA-CYA 126/8	0	1	2	11	15	0	17	3	7	1	2	2	9	1	1	9	11	0	6	2	0	0	5	4	3	17	0	7	0	0	0	0	0	0	0	0	3	2	4	2	0	0	0	4	0	0	9	0	0
186818: Planococcaceae	3	6	0	7	5	0	0	0	1	2	1	1	5	1	2	4	0	2	0	0	1	0	0	1	1	22	14	3	1	2	0	0	0	4	0	2	2	1	0	0	0	0	3	4	14	0	2	1	2
1372: Planococcus	43	54	1	218	356	4	36	42	102	33	144	94	56	3	48	11	14	0	28	20	2	7	35	20	66	2	15	93	11	0	0	0	0	103	0	1	154	10	0	0	2	0	14	17	16	1	60	50	1
192421: Planococcus maritimus	9	3	12	104	157	0	6	41	35	1	54	69	68	33	53	69	3	14	54	5	6	0	16	10	2	5	1	8	1	1	0	24	0	2	2	1	41	22	0	0	4	0	0	4	0	0	5	5	42
150123: Plantibacter flavus	2	0	1	1	66	0	2	2	25	1	5	7	2	1	0	2	0	1	1	3	0	0	2	6	0	6	1	0	1	5	0	0	1	1	0	1	2	1	4	5	0	1	1	3	2	0	1	36	4
703: Plesiomonas shigelloides	0	8	1	0	17	0	8	41	3	16	6	8	6	6	5	24	0	2	17	0	6	0	25	3	41	1	16	9	1	6	5	0	4	1	12	1	3	17	0	0	6	0	19	6	17	1	0	2	0
52959: Polaribacter	0	0	4	2	8	0	0	1	5	0	32	11	0	0	0	0	2	0	0	4	0	0	1	3	1	4	0	0	0	0	0	0	0	0	0	0	4	2	8	5	3	0	1	1	1	3	0	3	0
996801: Polaribacter reichenbachii	0	0	2	7	2	0	0	5	2	1	42	17	7	7	2	0	0	2	1	3	2	0	10	6	5	0	3	5	0	3	4	5	0	2	5	0	16	11	0	0	0	0	1	2	0	2	2	5	2
1529069: Polaribacter sp. BM10	0	2	0	2	4	0	0	4	1	3	16	2	4	1	9	5	0	0	1	1	1	0	4	2	0	7	2	0	0	3	0	0	0	0	0	0	4	6	0	0	1	0	0	0	16	0	0	2	0
365044: Polaromonas naphthalenivorans CJ2	1	5	1	1	0	2	0	0	13	3	1	1	0	10	0	0	0	1	0	1	0	0	0	0	0	2	0	0	10	1	0	1	0	6	13	0	3	4	0	0	0	0	1	4	0	0	2	2	0
296591: Polaromonas sp. JS666	2	3	1	1	1	3	11	7	34	1	17	6	5	1	1	30	1	2	135	1	2	0	13	7	0	1	4	2	4	10	6	3	2	4	9	0	5	9	3	2	2	1	3	6	5	1	14	5	3
49: Polyangiaceae	0	2	0	3	1	0	2	0	5	0	0	0	0	0	0	0	1	1	0	4	0	0	1	0	0	1	0	0	0	0	0	0	0	0	0	0	0	1	0	0	0	1	0	1	1	0	0	0	1
44013: Polynucleobacter	0	0	0	0	1	0	0	1	0	1	0	1	2	0	1	7	0	2	2	1	0	0	0	2	0	0	1	3	0	0	0	0	0	1	0	0	0	1	0	6	0	3	1	0	0	1	0	0	0
576611: Polynucleobacter asymbioticus	0	0	1	0	3	0	0	3	1	2	3	2	0	0	1	19	0	1	0	0	0	0	12	0	0	0	0	0	0	1	0	0	0	0	0	0	3	3	0	0	0	0	1	2	2	0	0	1	0
400092: Pontibacter korlensis	0	0	0	2	3	0	2	2	7	1	0	0	0	3	4	1	0	4	0	1	1	0	8	5	2	0	2	1	0	1	0	0	0	0	1	0	3	1	1	1	0	0	0	1	3	0	0	4	0
171551: Porphyromonadaceae	2860	587	555	1096	2277	68	9687	1832	1517	20242	12134	3960	2387	5425	15678	7960	347	384	12296	193	3775	274	2453	264	2418	1391	233	878	3706	657	1294	71	402	959	1176	922	2355	1709	781	339	206	77	3262	454	1396	232	39	1583	735
836: Porphyromonas	17	0	99	593	1287	44	270	72	166	72	13	145	357	553	1163	500	491	45	5	40	1	31	734	11	482	42	1	333	2304	59	280	278	66	76	250	701	2677	93	102	3	318	405	3519	2	120	0	59	55	221
879243: Porphyromonas asaccharolytica DSM 20707	47	394	59	1014	1526	26	111	277	285	44	564	1449	174	694	552	880	34	99	967	22	984	38	123	53	85	30	245	173	146	118	64	7	6	38	39	20	1418	111	5	66	10	10	142	80	455	4	7	162	162
837: Porphyromonas gingivalis	197	926	544	1794	2244	51	1506	670	642	142	1155	3555	978	3146	3224	1575	208	295	494	168	837	46	576	220	418	322	529	1758	1994	306	307	11	54	390	282	689	2058	322	1551	115	1005	1553	11656	300	1248	0	23	410	1019
1403335: Porphyromonas gingivalis 381	3	4	5	45	12	0	30	18	8	0	5	11	32	7	117	2	12	5	13	1	9	0	12	0	4	50	4	4	140	1	7	0	0	7	13	78	7	4	70	0	57	81	503	3	19	0	0	4	8
1403336: Porphyromonas gingivalis AJW4	8	17	62	201	136	0	46	42	47	5	77	335	50	95	231	87	7	38	248	4	38	2	71	1	93	16	27	17	314	119	27	8	5	74	28	52	1047	19	178	4	143	372	1160	27	111	1	1	21	229
431947: Porphyromonas gingivalis ATCC 33277	1	26	16	34	27	0	26	43	15	3	32	195	42	56	282	37	28	11	58	1	22	1	33	10	35	12	24	38	126	21	68	24	7	4	53	122	90	20	75	3	18	108	1163	6	32	1	0	9	16
1030843: Porphyromonas gingivalis TDC60	3	13	16	97	36	6	44	11	11	6	10	35	45	41	96	24	3	5	7	11	44	1	12	13	7	26	4	7	197	7	8	0	2	7	14	46	33	15	64	4	33	92	1704	7	17	0	2	4	8
242619: Porphyromonas gingivalis W83	24	143	36	548	1653	3	88	114	180	31	82	194	42	216	143	106	32	11	1	15	270	7	32	35	48	10	47	51	116	18	9	0	4	19	4	26	311	33	44	25	24	47	975	49	215	2	1	57	57
82985: Pragia fontium	0	0	0	0	5	0	0	1	0	1	0	3	0	8	0	12	0	0	0	0	0	0	10	0	0	0	2	1	1	0	0	0	0	1	0	2	0	1	0	0	0	0	0	0	0	0	0	0	10
838: Prevotella	30953	10897	53204	36749	51224	1128	87909	9175	55186	50703	43881	127065	56007	11760	42966	29003	5727	24998	20358	4387	21270	13512	29521	19238	51017	10636	23151	29904	8903	38564	5163	8075	13471	6900	7228	10981	44660	55238	36411	9611	5100	1905	16911	46974	2471	11271	2991	26029	143289
908937: Prevotella dentalis DSM 3688	595	246	2257	4403	7179	28	4895	882	3091	963	3079	5625	2175	1127	1291	1212	1810	1996	7333	314	897	650	3112	1857	2977	1680	1410	1144	386	3615	715	731	830	946	770	488	5957	4453	1082	362	219	273	417	1631	472	1129	149	757	5578
767031: Prevotella denticola F0289	3263	3559	10995	6990	18599	296	33718	4576	3911	20228	18178	36985	17331	3652	6359	5829	6742	12000	1690	2921	4563	3234	19233	9754	21642	15890	3301	4172	3219	3642	433	2004	6244	1767	4660	2968	19398	9194	10053	14570	2892	1733	911	6549	917	2743	767	4987	35680
76123: Prevotella enoeca	754	298	4657	4625	8285	95	10379	2537	3180	3954	3835	7890	9027	1719	1882	2178	2786	2255	21892	986	1108	760	3599	2142	6915	4460	1749	2115	961	5575	596	1209	883	664	775	509	7263	10325	2098	1571	146	129	1155	2942	988	2975	118	3351	8659
1236517: Prevotella fusca JCM 17724	2253	1590	7758	13712	9621	82	12365	2203	6189	11373	12431	35860	7606	1505	4641	3248	1364	8568	1832	1077	5526	1883	14727	7193	15833	2380	3056	1682	2846	8439	863	1127	4804	2898	1357	2692	19284	16138	8353	14990	2333	422	757	5817	367	1772	334	3321	29481
28131: Prevotella intermedia	3400	1160	18356	17563	13077	1636	13947	1115	8912	5797	6188	46001	10939	2750	4951	4883	6154	4180	3528	1476	3830	1741	9772	4212	13354	6902	4229	5566	3217	10876	1161	2466	2099	1951	820	2035	31381	18706	2735	1779	3101	227	1818	7186	659	2866	4392	5413	32687
246198: Prevotella intermedia 17	852	352	1947	5065	3385	129	4554	57	3366	3974	2338	7241	1883	276	1333	1959	416	2371	495	572	2618	482	3310	1000	7771	2556	1659	829	819	1246	746	173	2076	609	235	625	6811	4143	1485	968	789	20	148	3557	163	332	360	575	15141
1122984: Prevotella intermedia ATCC 25611 = DSM 20706	331	1905	2062	6017	7467	246	8121	618	12268	6068	4372	14123	3161	783	570	2165	2359	809	4001	130	356	636	3988	921	2569	2276	11360	7133	2072	8322	208	867	1036	798	403	983	9566	11389	835	194	1047	88	251	8895	907	1547	498	616	38716
553174: Prevotella melaninogenica ATCC 25845	17984	41517	140825	81846	57697	3074	83312	31116	90393	74896	95563	488070	47106	9360	55082	44248	2202	46265	3069	6171	25363	6963	41122	47863	73254	7252	39537	9466	4732	73947	2570	3461	13758	7057	7074	6061	100612	53199	42036	72977	8726	463	2072	45888	1020	8770	595	43415	503359
264731: Prevotella ruminicola 23	779	123	5068	7244	8731	10	4481	659	4119	1508	2905	7616	2644	547	2054	1337	128	968	1674	275	893	285	1703	1516	4054	1101	2588	942	377	3304	286	421	432	702	413	330	4129	7538	891	798	126	91	155	3473	221	1047	42	1015	7561
1236518: Prevotella scopos JCM 17725	7093	3629	35048	53166	26969	368	31883	4611	29029	29353	41868	140847	39726	6796	13997	7359	1954	18702	1242	1956	8199	10187	21942	17937	27013	1703	11860	5321	2805	70273	1261	1434	5776	6226	5368	6011	112907	67739	25113	6539	3336	793	1337	24301	1097	8179	1565	9531	63417
575614: Prevotella sp. oral taxon 299 str. F0039	3649	3573	13407	80122	15346	53	10707	7700	9158	2921	5268	20880	18190	6973	2642	1337	401	1404	2360	711	3949	2601	5327	4466	5444	1592	4279	2538	1235	8390	1782	3241	660	2765	1414	862	18750	5550	11959	1886	333	137	604	9105	4195	1602	90	3526	17063
167546: Prochlorococcus marinus str. MIT 9301	1	0	0	0	0	0	0	0	0	0	2	8	0	0	1	0	0	0	0	0	0	0	1	0	0	0	0	0	0	0	0	0	0	2	0	5	0	5	0	0	0	0	0	0	0	0	0	0	4
85017: Promicromonosporaceae	1	0	0	0	0	0	4	3	1	6	2	0	3	2	0	0	1	4	2	0	3	0	3	1	5	1	1	0	0	0	16	0	1	0	0	0	1	1	0	0	5	0	1	2	0	0	1	0	6
31957: Propionibacteriaceae	18	24	15	14	80	6	17	12	51	18	49	72	50	22	19	232	17	21	126	13	3	4	153	54	75	43	18	31	14	4	7	49	11	11	20	18	92	36	10	11	2	8	52	48	33	7	49	16	14
1234380: Propionibacterium acnes C1	0	1	0	0	0	0	0	0	0	0	0	0	0	0	0	1	0	0	0	0	0	0	0	1	0	0	0	0	0	0	1	0	0	0	0	0	1	1	0	0	0	0	0	0	2	0	0	0	0
1114967: Propionibacterium acnes TypeIA2 P.acn17	0	0	0	0	2	0	0	0	0	4	0	0	0	0	7	1	0	0	0	0	0	1	0	0	4	8	1	0	0	0	0	0	0	0	0	0	0	3	1	0	0	0	0	0	0	0	0	0	0
1744: Propionibacterium freudenreichii	7	25	4	3	35	3	6	2	21	11	37	18	10	23	7	34	1	5	13	0	0	0	56	23	20	4	6	4	0	0	2	3	28	2	6	1	24	47	18	22	0	9	37	23	22	26	48	13	13
66712: Propionibacterium freudenreichii subsp. freudenreichii	35	0	1	0	52	1	20	5	5	3	31	5	12	6	5	1	0	2	2	2	0	0	13	12	5	6	0	2	12	3	5	2	2	0	5	6	7	40	2	1	3	0	0	9	2	1	1	10	9
754252: Propionibacterium freudenreichii subsp. shermanii CIRM-BIA1	2	0	0	2	32	0	0	1	5	4	3	7	7	0	0	1	0	1	1	1	1	0	1	7	17	1	4	16	0	1	0	1	4	0	0	0	14	4	1	4	0	0	0	7	1	1	2	5	3
671223: Propionibacterium sp. oral taxon 193	51	3	4	51	47	0	4	7	31	1	9	31	6	1	1	4	0	2	3	1	0	0	12	5	4	2	1	13	2	0	0	0	0	13	0	1	10	33	3	1	0	0	5	4	0	1	3	7	2
1871034: Propionimicrobium sp. Marseille-P3275	31	6	5	53	57	2	37	15	66	9	53	39	28	6	26	11	13	12	201	2	6	2	10	61	26	15	12	14	16	3	4	18	40	5	3	8	2	125	43	45	1	1	1	14	5	10	4	3	90
1642647: Proteiniphilum saccharofermentans	3	6	8	19	16	5	11	12	4	4	13	58	13	99	27	30	1	24	7	2	10	0	11	0	11	116	5	24	13	5	3	3	4	4	9	8	19	17	6	14	0	0	1	2	10	3	0	6	4
1224: Proteobacteria	2328	7011	2409	5629	4309	1116	2873	17799	2041	3626	2900	20430	4598	6641	6150	19907	40	10465	24263	4362	6168	449	12196	9954	4604	1719	14583	7062	3533	5375	9000	1410	863	1687	7840	4427	23376	7837	88	288	2568	178	20203	6579	14162	1104	568	9149	1551
389348: Protochlamydia naegleriophila	0	0	0	0	0	0	0	0	0	0	0	0	0	0	0	0	0	0	0	0	0	0	0	0	0	0	0	0	0	0	0	0	0	0	0	0	0	1	0	0	0	1	0	0	0	0	0	0	0
1141663: Providencia rettgeri Dmel1	0	0	0	0	0	0	1	0	1	0	0	0	0	0	0	2	0	0	0	0	0	0	1	0	0	0	0	0	0	0	0	0	0	0	0	0	0	1	0	0	0	0	0	0	0	0	0	0	0
1141660: Providencia sneebia DSM 19967	0	3	0	0	0	0	3	0	0	0	1	0	0	0	0	3	0	0	0	0	0	0	1	0	0	0	0	1	0	0	0	0	0	0	0	0	0	1	0	0	0	0	0	0	0	0	0	0	0
82654: Pseudanabaena sp. PCC 7367	2	2	0	0	0	0	2	4	0	1	0	0	1	0	0	0	0	0	0	0	0	0	0	1	0	1	0	2	0	0	0	0	0	1	0	0	5	7	0	0	1	1	0	0	0	0	0	8	0
1742993: Pseudarthrobacter	0	0	0	0	0	0	0	1	0	0	2	0	0	1	0	0	0	0	0	1	0	0	0	1	0	1	0	0	0	0	0	1	1	1	0	0	0	4	0	0	0	0	0	0	3	0	0	0	0
452863: Pseudarthrobacter chlorophenolicus A6	6	1	10	11	141	3	15	64	20	11	28	19	2	16	65	13	1	1	67	4	10	0	38	10	26	7	7	10	5	3	4	2	6	5	5	7	10	11	3	18	1	1	15	12	12	6	4	9	21
930171: Pseudarthrobacter phenanthrenivorans Sphe3	5	0	0	0	11	0	1	0	6	1	3	3	1	0	0	0	1	1	1	1	1	0	0	1	0	1	1	0	0	0	1	0	2	0	0	0	1	1	1	11	0	0	0	0	0	0	0	3	22
121292: Pseudarthrobacter sulfonivorans	5	4	4	3	17	0	3	8	3	15	8	21	2	8	6	11	0	7	32	4	4	5	6	21	4	7	5	3	1	7	1	4	15	1	7	4	4	10	3	5	1	3	0	4	1	1	5	11	9
53246: Pseudoalteromonas	1	0	0	2	1	0	3	1	4	2	3	5	0	0	1	0	0	4	1	0	0	0	1	1	3	1	0	2	0	3	0	0	0	1	0	0	2	1	0	0	0	0	2	1	1	1	0	0	4
342610: Pseudoalteromonas atlantica T6c	0	0	0	0	0	0	2	0	0	0	0	0	0	2	0	1	0	0	0	0	0	0	0	0	0	0	0	0	0	0	0	0	0	0	0	0	0	3	0	0	0	1	0	0	0	0	0	0	0
152297: Pseudoalteromonas issachenkonii	0	0	0	0	0	0	0	0	0	0	0	9	0	2	0	0	0	0	0	0	0	0	0	0	0	0	0	0	0	0	0	0	0	0	0	0	1	5	0	0	0	0	0	0	0	0	0	0	0
43657: Pseudoalteromonas luteoviolacea	0	0	1	2	4	0	1	2	4	2	3	10	5	3	2	0	0	0	7	0	0	1	0	1	0	0	2	0	0	2	0	0	0	0	1	0	4	4	0	1	0	0	2	1	3	0	0	0	1
748280: Pseudogulbenkiania sp. NH8B	1	16	2	0	10	2	11	39	15	7	8	3	11	6	15	2	0	12	13	0	5	10	29	43	9	0	10	5	1	8	7	0	3	26	24	3	9	9	1	2	1	2	13	3	8	0	5	28	2
1249552: Pseudohongiella spirulinae	0	0	0	1	7	0	2	1	3	0	0	0	3	0	0	0	0	0	5	0	1	0	0	1	4	0	0	0	0	0	0	0	0	0	5	0	14	3	0	0	0	0	0	0	0	0	0	9	0
135621: Pseudomonadaceae	0	5	2	1	12	4	2	3	6	10	37	1	1	4	2	4	2	66	2	17	0	3	5	3	1	5	5	4	4	11	1	1	2	2	2	0	7	11	0	0	1	0	39	2	4	25	9	9	12
72274: Pseudomonadales	0	0	0	0	0	0	2	0	5	4	2	0	3	1	3	1	1	0	0	3	5	1	1	1	2	3	3	6	3	2	0	0	0	1	1	2	3	8	0	0	0	0	4	1	2	0	0	0	4
286: Pseudomonas	10	73	18	42	130	31	127	116	45	51	115	311	31	266	49	227	31	351	701	173	12	3	220	31	76	19	79	44	39	161	185	4	28	28	33	78	90	154	9	11	1	4	106	125	82	387	54	48	101
1051004: Pseudomonas aeruginosa 213BR	0	0	0	0	1	0	0	0	0	0	0	0	0	0	0	0	0	0	0	0	0	0	0	0	0	0	0	0	0	0	0	0	0	0	0	0	0	2	0	0	0	0	0	0	0	0	0	0	0
587753: Pseudomonas chlororaphis	0	1	0	0	0	0	0	4	2	0	3	0	0	0	0	0	0	0	0	0	0	0	1	0	0	0	0	1	0	0	0	0	1	0	0	0	0	1	0	0	0	0	1	2	0	0	1	0	0
1441629: Pseudomonas cichorii JBC1	0	1	0	0	0	0	0	2	1	0	0	0	0	0	0	1	0	8	1	2	0	0	0	0	0	0	0	0	0	0	0	0	0	0	0	0	0	1	0	0	0	0	0	0	1	0	3	2	0
53408: Pseudomonas citronellolis	0	0	0	0	8	0	0	1	1	3	0	1	0	0	0	0	0	0	0	0	0	0	3	0	1	0	1	0	0	0	0	0	0	0	0	0	2	2	0	0	0	2	0	0	1	1	0	6	2
76869: Pseudomonas putida GB-1	0	3	0	2	0	0	0	1	2	0	4	0	0	6	0	0	0	0	0	0	0	0	3	0	6	0	0	0	0	0	1	0	2	0	0	0	0	5	0	0	0	0	0	0	0	0	0	0	0
1193499: Pseudomonas putida SJTE-1	0	0	0	0	0	0	0	0	0	0	0	0	0	0	0	0	0	0	0	0	0	0	0	0	0	0	0	0	0	0	0	0	0	0	0	0	0	1	0	0	0	0	0	0	0	0	0	0	0
1881017: Pseudomonas sp. 7SR1	0	0	0	0	0	0	0	0	0	0	0	0	0	0	0	0	0	0	0	0	0	0	0	0	0	0	0	0	0	0	0	0	0	0	0	0	0	1	0	0	0	0	0	0	0	0	0	0	0
1930532: Pseudomonas sp. CC6-YY-74	0	0	0	0	1	0	2	1	0	0	0	0	0	2	0	0	0	0	0	2	0	0	3	1	0	1	1	1	0	2	0	0	1	0	1	0	0	2	0	3	0	0	1	1	0	2	0	0	6
150396: Pseudomonas sp. MT-1	0	0	0	0	0	0	2	0	0	0	1	0	0	0	0	0	0	0	3	0	0	0	2	0	0	0	0	0	0	0	0	0	0	0	2	0	0	1	0	0	0	0	0	0	0	0	0	1	0
1028989: Pseudomonas sp. StFLB209	0	1	0	0	3	0	1	16	0	0	0	0	11	26	1	0	0	0	18	0	0	0	3	15	0	0	3	5	0	0	0	0	0	0	0	5	24	13	2	0	0	0	2	0	0	1	0	0	0
1283291: Pseudomonas sp. URMO17WK12: I11	0	0	2	12	1	0	1	0	1	0	0	1	0	0	0	1	0	0	4	0	0	0	0	2	0	0	0	1	0	0	0	0	0	0	0	0	0	1	0	0	0	0	0	0	1	0	0	0	10
316: Pseudomonas stutzeri	1	4	2	0	2	0	2	8	1	0	4	2	0	4	0	2	0	1	3	1	0	0	2	2	1	4	2	0	1	0	1	0	0	0	2	0	5	1	0	0	0	1	0	0	1	0	1	4	3
317: Pseudomonas syringae	0	0	0	0	0	0	0	0	1	0	0	0	0	0	1	0	0	0	0	0	0	0	0	0	0	0	0	0	0	0	0	0	1	0	0	0	0	3	0	0	0	0	0	0	0	0	0	0	0
29442: Pseudomonas tolaasii	1	6	8	14	5	3	3	26	3	7	5	7	0	1	7	8	1	2	1	0	0	3	0	3	10	3	6	2	4	7	1	4	2	10	6	5	2	9	4	0	1	1	4	9	7	1	3	8	10
1847: Pseudonocardia	4	1	18	26	392	0	33	19	58	3	21	65	2	1	13	2	8	1	2	9	0	1	4	46	2	6	1	2	1	5	4	33	4	2	0	1	2	6	4	8	0	3	5	6	6	10	2	25	69
675635: Pseudonocardia dioxanivorans CB1190	2	0	3	1	9	0	2	5	11	0	0	5	0	0	1	1	1	1	0	2	0	0	1	7	0	7	0	2	0	0	0	0	2	0	0	0	1	1	0	3	0	0	0	2	1	0	0	2	14
445576: Pseudonocardia sp. AL041005-10	0	0	0	1	18	0	1	2	4	1	23	7	3	0	0	2	0	6	0	0	0	0	0	2	1	2	0	0	0	0	3	2	0	0	0	0	1	1	0	0	0	0	0	1	0	0	0	2	3
1096856: Pseudonocardia sp. EC080619-01	3	0	0	0	24	0	0	0	20	0	10	8	0	0	4	0	0	1	26	0	0	0	0	1	13	0	0	0	1	0	0	0	0	0	0	2	0	20	2	1	0	0	0	0	0	4	0	0	12
1096868: Pseudonocardia sp. EC080625-04	1	1	0	1	12	0	2	0	9	0	1	6	3	2	3	0	0	1	17	0	0	0	0	3	1	2	0	1	1	0	1	2	1	1	0	1	2	3	3	5	0	0	1	4	0	2	0	0	11
1690815: Pseudonocardia sp. HH130630-07	0	0	1	1	1	0	1	0	0	0	0	1	0	0	0	0	0	3	0	0	0	0	0	1	0	0	0	0	0	0	0	0	0	2	0	0	0	1	0	1	0	0	0	0	0	0	0	0	3
2070: Pseudonocardiaceae	5516	0	206	2775	5635	19	2385	894	12376	1071	3449	4021	1846	540	5271	312	6	693	42589	440	1310	279	963	5557	1673	32	432	1006	5120	1847	462	593	2344	1991	253	984	695	18501	5451	22576	89	1249	122	3708	14	5054	720	251	22504
762903: Pseudopedobacter saltans DSM 12145	3	2	1	15	13	3	22	23	25	1	8	45	0	47	81	62	0	0	2	0	10	0	150	2	22	5	16	6	2	10	0	0	0	1	0	3	1	1	0	5	0	0	1	7	8	4	0	11	0
767029: Pseudopropionibacterium propionicum F0230a	56	75	96	137	164	2	39	127	204	42	345	167	99	318	124	489	16	73	336	29	14	0	389	305	164	91	78	69	24	8	16	72	9	28	23	12	145	112	18	116	18	27	426	298	229	29	179	154	78
1123384: Pseudothermotoga hypogea DSM 11164 = NBRC 106472	0	0	0	0	1	0	4	0	0	0	4	2	1	0	0	1	0	0	0	0	0	1	1	1	4	3	0	0	0	0	0	0	1	0	5	0	0	1	0	0	0	0	2	0	0	0	0	2	3
911045: Pseudovibrio sp. FO-BEG1	0	0	3	0	1	0	0	0	0	0	0	0	0	0	1	0	0	0	1	0	1	0	2	1	0	0	0	0	0	0	0	1	1	0	0	0	0	4	0	0	0	0	0	0	0	0	0	0	2
1045855: Pseudoxanthomonas spadix BD-a59	1	0	2	1	13	2	0	11	10	0	20	12	40	0	2	0	0	1	31	0	0	0	55	9	1	3	0	1	2	0	0	1	0	0	0	0	18	62	1	4	0	0	7	5	8	5	0	2	0
497: Psychrobacter	0	12	2	0	9	1	0	8	2	2	5	2	0	4	0	7	2	23	8	8	2	0	9	1	0	1	6	2	17	18	11	1	5	17	20	5	11	1	0	0	0	1	4	3	4	1	2	9	1
1720344: Psychrobacter sp. AntiMn-1	0	1	0	1	1	0	0	0	0	1	0	0	0	3	0	1	1	0	0	0	0	0	0	0	0	0	0	0	0	0	0	0	0	1	0	0	0	1	0	0	0	0	0	1	0	0	0	0	0
313595: Psychroflexus torquis ATCC 700755	0	1	0	2	8	0	2	5	2	1	4	12	1	1	4	5	0	1	0	0	5	0	5	2	4	0	1	4	0	7	0	0	0	1	1	0	16	10	8	3	0	0	1	3	2	3	0	1	6
1007105: Pusillimonas sp. T7-7	1	14	2	0	5	0	9	41	2	7	7	0	2	14	0	3	0	0	2	0	7	3	7	2	12	1	5	0	0	1	5	0	0	0	1	2	1	12	0	0	0	0	6	7	14	0	0	1	1
190721: Ralstonia insidiosa	0	0	0	4	0	2	1	3	1	4	4	1	0	2	0	6	0	0	1	5	0	0	6	0	1	0	1	4	0	0	0	0	0	0	0	0	0	1	0	0	0	0	0	1	20	0	0	3	0
305: Ralstonia solanacearum	1	25	0	0	5	1	43	27	5	22	2	25	1	0	0	43	0	1	3	2	2	0	28	1	7	0	9	17	0	4	14	0	0	0	27	0	42	8	0	0	0	1	8	70	2	0	0	0	0
1130828: Ralstonia solanacearum FJAT-1458	0	3	0	0	10	0	0	0	0	2	0	0	4	1	2	40	0	0	3	0	6	0	0	0	0	0	0	1	1	0	2	0	0	0	0	0	0	1	0	0	0	0	4	13	6	0	0	0	0
1457195: Ralstonia solanacearum Rs-10-244	0	0	10	0	0	0	0	0	0	0	3	0	0	0	4	0	0	0	0	0	0	0	2	0	0	0	0	0	0	0	0	0	0	0	0	0	1	5	0	0	0	0	0	1	0	0	0	0	0
365046: Ramlibacter tataouinensis TTB310	30	13	14	8	1	2	12	18	18	16	3	0	0	0	5	1	0	16	7	5	1	6	17	0	8	1	14	6	10	9	5	0	0	6	16	0	76	41	29	29	21	60	8	1	7	0	10	2	8
54291: Raoultella ornithinolytica	1	0	0	0	0	0	0	3	0	0	0	0	0	0	0	0	0	0	0	0	0	0	7	0	4	0	0	0	0	1	0	0	0	0	7	0	0	1	0	0	0	0	0	0	0	0	0	1	0
145458: Rathayibacter toxicus	1	1	6	58	5	1	2	12	137	1291	18	177	41	3	1	0	4	42	0	7	5	0	0	4	264	3	26	1	0	2	2	0	61	0	0	1	5	7	31	9	4	0	2	37	2	22	9	5	4216
33888: Rathayibacter tritici	0	0	6	5	5	0	6	1	0	3	3	2	17	1	0	1	1	3	2	0	0	1	0	1	2	1	1	0	1	2	0	9	0	0	0	0	2	17	1	1	0	0	1	1	2	0	0	0	2
288705: Renibacterium salmoninarum ATCC 33209	2	1	5	4	4	0	30	1	5	11	12	6	4	1	3	2	1	1	0	1	1	0	1	1	0	1	5	0	0	3	0	0	4	0	0	1	3	6	2	3	0	3	1	9	1	2	1	5	50
82115: Rhizobiaceae	0	0	0	0	0	0	0	2	0	0	2	1	0	2	0	2	0	5	0	0	0	0	4	3	0	2	2	0	0	1	0	0	4	1	0	0	2	4	1	0	0	0	0	1	1	0	1	5	0
356: Rhizobiales	5	14	4	4	14	11	11	6	16	29	7	6	5	10	5	11	0	27	6	12	1	4	9	3	4	23	60	8	5	3	6	0	3	7	3	1	5	20	0	0	1	4	3	30	9	4	2	21	53
1125847: Rhizobium sp. NT-26	0	0	0	0	0	0	0	0	1	0	0	0	0	0	0	0	0	1	0	0	0	0	0	0	0	0	0	0	0	0	0	0	0	0	0	0	0	1	0	0	0	0	0	0	0	0	0	1	0
1869170: Rhizobium sp. S41	0	0	0	1	0	0	0	6	2	5	0	0	0	1	3	4	2	0	43	0	0	0	1	0	1	0	0	3	0	0	0	0	0	0	0	0	5	12	0	0	0	0	0	0	1	0	8	1	0
698761: Rhizobium tropici CIAT 899	0	0	0	0	0	0	0	0	1	0	0	0	0	0	0	0	0	0	0	0	0	0	0	0	0	0	0	0	0	0	0	0	0	0	0	0	0	1	0	0	0	0	0	0	0	0	0	0	1
666685: Rhodanobacter denitrificans	0	0	0	2	0	2	0	1	0	0	0	0	0	0	0	3	0	2	4	0	0	0	0	0	0	0	0	0	0	0	0	0	0	0	0	0	0	1	0	0	0	0	2	5	0	0	0	0	0
1060: Rhodobacter	0	0	0	0	0	1	0	0	0	1	0	0	0	0	0	0	0	0	0	0	0	0	0	0	0	3	0	0	0	0	0	0	0	0	0	0	1	1	0	0	0	0	0	0	1	0	0	1	1
272942: Rhodobacter capsulatus SB 1003	4	1	1	0	0	2	0	0	0	0	0	1	0	0	0	1	0	0	0	0	0	0	0	0	0	0	0	0	0	0	0	0	0	0	0	0	5	10	5	2	3	6	0	0	0	0	0	1	0
1063: Rhodobacter sphaeroides	1	2	0	1	1	1	0	4	0	1	7	0	1	2	0	3	1	1	1	2	0	1	2	0	1	4	0	0	0	0	0	1	0	3	0	0	1	1	0	0	1	2	2	7	0	0	1	0	0
349102: Rhodobacter sphaeroides ATCC 17025	1	5	0	0	0	0	0	1	0	1	0	0	0	0	0	0	0	0	0	0	0	0	0	0	0	0	0	1	0	0	0	0	0	0	1	0	2	1	0	1	4	1	0	0	1	0	1	3	0
31989: Rhodobacteraceae	7	1	4	1	3	16	1	3	5	2	8	6	5	0	1	13	3	20	17	6	0	1	4	6	0	2	2	6	1	1	3	0	0	2	4	0	74	9	2	7	6	8	3	5	3	2	0	7	7
1827: Rhodococcus	4	28	10	23	213	14	32	37	22	31	49	71	13	49	51	52	12	16	17	20	16	4	26	22	47	34	20	36	15	27	24	10	12	28	13	7	19	18	4	7	1	3	30	16	23	3	20	23	64
191292: Rhodococcus aetherivorans	1	0	1	0	6	0	0	4	5	3	2	8	2	1	2	3	0	2	10	0	2	0	0	3	1	3	3	2	0	0	0	0	2	1	0	0	2	1	1	0	0	1	1	0	1	0	0	3	1
685727: Rhodococcus equi 103S	0	0	0	2	1	0	0	1	1	3	0	5	1	2	1	0	0	2	0	0	0	0	0	2	0	0	0	1	0	0	0	0	0	0	1	0	0	2	1	3	0	0	0	1	0	0	0	1	23
1136179: Rhodococcus erythropolis CCM2595	0	0	1	0	7	0	0	0	2	3	1	3	0	0	0	0	0	0	0	0	0	0	0	7	0	0	0	1	0	0	0	0	0	0	0	0	0	1	1	1	1	0	0	3	0	0	0	0	8
1723645: Rhodococcus sp. 008	1	4	6	2	22	6	20	119	9	7	18	82	32	5	8	8	18	19	39	0	0	0	20	5	8	32	0	10	0	3	2	1	1	1	0	1	38	31	8	11	5	3	175	26	8	135	34	21	6
1807790: Rhodococcus sp. BH4	0	0	0	0	0	0	0	0	8	0	0	2	1	0	0	0	0	0	7	0	0	0	1	0	0	0	0	0	0	0	0	0	0	1	1	0	0	2	0	0	0	0	0	0	0	0	0	1	0
1805827: Rhodococcus sp. MTM3W5.2	0	0	1	5	14	0	1	0	4	2	10	1	1	1	1	0	1	0	2	2	0	0	1	3	0	1	0	2	0	0	0	0	2	0	0	0	1	1	0	0	0	0	0	13	1	1	0	0	10
1653478: Rhodococcus sp. PBTS 1	0	3	0	2	7	2	1	4	1	3	2	1	0	0	0	0	0	1	0	0	0	0	0	0	0	1	0	0	0	0	0	0	0	0	0	0	0	3	0	0	1	1	0	2	1	1	0	11	0
1033922: Rhodococcus sp. WB1	4	0	0	1	5	0	0	5	3	1	1	3	0	2	0	1	9	5	1	0	3	3	4	4	1	10	1	1	1	0	0	0	1	0	2	2	3	4	4	3	0	0	0	2	6	2	0	10	2
935199: Rhodococcus sp. p52	0	0	2	1	8	0	1	0	1	3	0	0	1	0	0	6	0	0	1	0	0	0	0	1	0	0	3	1	0	0	1	1	0	0	0	0	0	1	0	0	0	0	0	2	0	0	0	2	7
75787: Rhodocyclaceae	1	43	19	6	420	0	43	60	377	13	83	28	110	0	3	1105	1	14	521	20	189	5	100	30	5	1	30	41	4	10	5	0	1	9	26	3	307	46	0	0	2	1	106	102	80	12	3	21	1
81479: Rhodoferax antarcticus	0	4	2	0	0	0	0	1	1	0	2	2	2	3	0	2	0	0	0	0	0	0	6	0	1	0	1	0	1	3	0	0	1	2	0	3	1	2	0	1	0	0	0	0	0	0	4	1	0
1842727: Rhodoferax sp. DCY110	0	5	1	0	0	1	2	2	4	1	0	0	0	1	0	2	0	1	0	0	0	0	1	0	0	0	0	0	0	1	2	1	0	0	4	0	1	1	0	0	0	0	1	3	2	0	6	2	1
529883: Rhodoluna	3	0	3	1	4	0	0	7	0	2	0	0	0	0	2	0	0	1	1	0	0	0	0	0	0	0	0	0	0	0	0	0	0	0	0	0	3	1	0	0	2	0	0	1	0	0	1	0	1
529884: Rhodoluna lacicola	1	0	1	1	2	1	1	0	1	2	0	1	1	5	0	4	0	9	0	0	1	0	1	3	3	1	0	2	0	0	0	2	0	3	1	0	3	3	4	0	0	7	0	1	4	1	0	2	6
648757: Rhodomicrobium vannielii ATCC 17100	2	14	8	3	42	0	2	4	12	2	9	16	13	16	28	10	1	0	79	1	9	1	3	4	5	4	1	4	11	1	4	1	1	3	3	2	8	30	0	1	0	0	16	4	2	0	5	9	5
204441: Rhodospirillales	3	0	6	228	2	25	2	30	5	1	17	461	0	6	87	23	1489	10	0	368	3	0	0	102	32	2072	4	37	0	0	5	0	9	1	2	0	6	30	103	244	21	2	0	95	5	0	2	45	0
780: Rickettsia	0	0	0	0	0	0	0	1	1	0	0	0	0	0	0	1	0	0	0	0	0	0	1	0	0	0	1	0	0	1	0	0	0	0	0	0	0	5	0	1	1	0	0	1	3	2	2	1	0
369822: Rickettsia raoultii	0	0	0	2	2	0	0	0	1	0	0	0	0	0	0	0	0	0	0	0	0	0	0	0	0	0	0	0	0	0	0	0	0	0	0	0	0	1	0	0	0	0	0	0	0	0	0	0	0
1105109: Rickettsia slovaca str. D-CWPP	0	0	19	1	0	1	0	0	1	1	0	8	0	3	0	0	5	0	0	2	0	0	1	1	0	21	0	7	0	0	0	0	0	0	0	0	0	1	0	0	0	0	0	0	2	0	0	3	0
34085: Riemerella anatipestifer	29	152	24	51	82	0	34	710	115	54	369	118	65	214	193	332	7	20	202	21	282	7	58	47	99	10	93	67	18	34	23	1	5	2	12	18	83	18	3	5	6	1	14	51	105	14	15	74	72
693978: Riemerella anatipestifer ATCC 11845 = DSM 15868	161	211	150	216	188	0	87	1231	148	36	908	419	138	349	310	566	31	73	1343	86	1495	30	557	131	164	47	438	129	141	1148	140	15	37	56	177	95	569	107	11	40	45	4	3034	265	253	124	22	117	368
1228997: Riemerella anatipestifer RA-CH-1	22	176	70	20	158	0	144	592	47	59	466	74	99	240	122	588	7	7	66	11	52	11	52	139	188	14	290	29	68	60	58	0	0	2	41	0	187	42	4	0	5	1	69	137	93	80	11	3	22
992406: Riemerella anatipestifer RA-GD	3	14	9	4	3	0	9	75	5	10	38	36	30	13	19	32	5	0	22	4	32	0	11	9	39	3	8	4	5	18	0	0	1	0	3	0	20	2	0	0	5	0	1	7	10	0	23	12	13
1455062: Riemerella anatipestifer Yb2	1399	4953	884	593	952	0	1668	30145	2269	3092	8581	3908	935	5958	4149	6416	43	339	5123	1713	16234	395	2944	773	2337	7	3132	39	1943	4457	2779	17	37	58	5705	882	2713	413	7	31	296	0	483	2159	7649	557	23	2308	679
373994: Rivularia sp. PCC 7116	0	0	0	0	0	2	2	6	0	1	3	0	1	2	34	0	0	0	2	411	2	1	4	4	10	4	7	11	1	0	0	0	15	5	0	0	0	10	0	0	2	0	0	0	2	6	0	1	9
76731: Roseateles depolymerans	0	5	12	0	1	2	22	49	14	18	13	13	12	16	0	13	0	23	4	1	1	0	19	5	6	13	19	3	0	24	0	7	0	2	3	2	33	8	2	0	0	2	29	28	32	0	20	19	6
585394: Roseburia hominis A2-183	10	1	9	23	44	2	61	14	34	34	95	40	33	18	10	20	2	4	5	0	5	3	24	38	35	1	73	18	3	7	2	2	24	10	7	5	10	56	6	7	0	1	0	42	1	4	3	22	137
357808: Roseiflexus sp. RS-1	0	0	0	1	2	0	1	0	0	0	4	22	2	3	2	0	0	0	0	0	0	0	0	1	0	0	1	0	1	2	0	0	1	0	0	0	1	5	0	0	0	0	0	1	0	0	0	0	1
257708: Roseomonas gilardii	1	1	2	0	1	0	0	1	1	0	0	0	2	1	0	1	0	2	1	1	0	0	0	0	0	2	0	1	1	0	0	0	0	0	0	0	0	1	0	0	0	1	2	3	0	0	0	0	0
32207: Rothia	80	175	154	724	898	319	416	3676	356	301	625	1531	415	955	264	543	252	163	13938	312	267	170	291	514	912	721	1084	208	57	367	210	496	57	88	304	387	682	1510	51	26	33	315	212	235	372	155	200	483	389
762948: Rothia dentocariosa ATCC 17931	490	1710	879	1952	2400	604	2020	7754	920	1908	4649	4341	1152	2260	785	1246	3609	1509	4997	541	523	879	1161	1731	1278	8520	2368	343	257	1510	138	464	68	544	1158	517	831	2821	1837	456	684	1003	930	655	1904	1223	360	3953	1022
43675: Rothia mucilaginosa	7886	11203	12111	22774	35390	7658	12325	40261	23550	28441	42672	40668	36034	26101	19021	27268	945	4827	18679	10356	11562	3626	12741	25184	14142	35727	17435	5118	749	15899	3268	4881	4825	3395	2638	7017	10005	9948	1792	1163	2411	7999	3855	10495	13129	1905	8577	22161	19767
680646: Rothia mucilaginosa DY-18	5581	3806	4249	5533	13340	2012	4410	26276	8329	8498	13382	21243	6350	9544	4900	11207	1180	2265	7273	4653	2240	1050	4386	7283	3576	39589	12693	3233	316	5398	1214	1231	1250	1551	1404	3058	2623	5075	1419	433	1050	5725	2146	5305	5360	5318	3127	16981	8680
756272: Rubinisphaera brasiliensis DSM 5305	1	6	2	1	1	4	3	2	0	46	2	0	0	4	3	0	0	3	0	1	0	0	1	0	0	4	2	1	2	1	1	0	0	0	0	0	5	1	3	3	2	4	1	5	1	0	5	0	0
983917: Rubrivivax gelatinosus IL144	0	2	0	3	2	3	3	5	3	1	2	2	1	0	0	11	0	1	2	2	0	1	7	1	0	1	5	0	1	0	1	0	0	0	0	1	5	2	1	0	0	0	9	5	5	0	0	4	1
1379909: Rufibacter sp. DG15C	1	0	0	14	2	3	1	1	0	1	1	4	2	1	3	0	1	2	0	1	0	1	1	0	0	1	0	2	1	14	0	0	0	2	0	3	6	6	0	1	1	0	2	1	1	0	0	1	2
1834198: Ruminiclostridium sp. KB18	0	6	2	1	5	0	3	1	6	1	5	6	3	1	2	2	0	3	4	0	1	0	0	2	2	0	0	0	3	3	0	0	1	1	1	0	1	4	2	0	0	0	0	2	0	1	1	2	2
1515: Ruminiclostridium thermocellum	3	1	10	14	4	11	4	4	2	5	3	20	20	1	7	2	0	0	6	2	0	0	2	6	3	5	3	1	3	0	0	7	2	0	2	7	5	4	0	95	2	16	6	0	0	2	0	6	15
203119: Ruminiclostridium thermocellum ATCC 27405	0	0	0	0	2	0	1	2	1	5	4	2	1	1	1	1	2	1	2	0	0	0	1	0	5	0	5	0	0	0	0	0	0	0	1	0	2	9	0	1	0	0	0	2	1	0	0	2	5
541000: Ruminococcaceae	0	2	1	4	4	0	2	0	2	0	3	23	0	9	4	7	1	7	1	1	5	0	3	4	5	0	3	2	2	3	4	0	1	3	1	2	4	3	0	0	0	0	1	2	5	0	0	2	1
1263: Ruminococcus	0	0	1	0	2	0	1	2	6	2	4	14	2	0	4	1	0	12	0	1	1	0	0	1	1	0	0	0	0	2	2	1	0	0	1	0	9	2	1	2	2	0	1	1	1	0	1	5	1
697329: Ruminococcus albus 7 = DSM 20455	2	2	5	10	4	1	33	1	7	23	8	8	10	7	6	1	0	21	1	0	3	2	0	6	8	1	4	1	1	2	0	0	2	1	0	2	1	1	0	6	0	0	0	12	4	0	0	2	22
1160721: Ruminococcus bicirculans	0	3	5	2	16	0	6	4	15	14	10	14	6	0	4	3	0	9	2	0	0	0	1	9	4	1	0	1	2	2	2	0	0	1	1	1	4	9	0	5	0	1	0	4	0	0	0	3	28
213810: Ruminococcus champanellensis 18P13 = JCM 17042	18	0	10	15	10	1	68	26	6	45	49	11	66	4	14	16	0	33	17	0	25	4	10	5	24	4	13	1	1	2	2	1	0	0	2	0	8	25	1	17	1	1	0	6	0	3	0	7	32
241244: Rummeliibacillus stabekisii	12	31	14	10	99	1	16	54	25	14	65	23	8	30	14	16	9	27	13	10	2	0	22	11	14	29	14	17	3	1	0	1	0	4	7	5	16	2	0	4	5	1	8	15	8	1	0	121	33
761193: Runella slithyformis DSM 19594	2	3	0	6	0	0	11	4	1	1	1	2	0	0	3	2	3	0	3	0	0	0	2	0	1	0	0	0	0	10	1	0	1	0	2	1	0	4	2	0	1	0	4	1	1	0	0	0	4
1851: Saccharomonospora	5	0	3	3	7	0	2	3	2	3	2	17	3	11	8	0	0	0	0	9	0	0	5	14	1	3	1	2	0	0	0	0	4	0	2	0	0	3	0	11	0	0	0	4	2	0	1	1	92
882082: Saccharomonospora cyanea NA-134	28	1	1	17	19	0	22	10	168	7	17	81	20	10	10	6	1	2	73	14	5	0	12	29	11	1	3	17	43	6	7	5	21	9	1	22	19	81	9	303	0	3	0	39	0	20	1	2	271
928724: Saccharomonospora glauca K62	0	0	1	3	5	0	2	1	2	2	1	17	1	0	0	0	0	0	1	0	0	0	1	7	0	7	2	1	1	0	1	0	0	3	0	1	2	2	0	0	0	0	0	5	2	2	0	2	2
882083: Saccharomonospora marina XMU15	5	2	5	8	130	0	5	26	18	13	16	34	27	103	5	15	60	1	63	6	1	0	21	17	20	22	8	8	1	1	9	3	1	2	6	0	25	2	10	11	0	8	1	9	7	12	2	29	107
4930: Saccharomyces	0	0	0	0	0	0	0	0	0	0	0	5	1	0	0	0	1	0	0	0	0	0	8	3	0	0	1	47	15	0	0	0	0	4	0	0	0	5	0	0	10	17	0	0	0	2	8	0	139
559292: Saccharomyces cerevisiae S288c	1	10	3	1	0	4	1	1	5	21	3	354	2	5	0	1	8	1	15	7	0	0	135	84	2	16	27	1279	552	0	1	0	0	14	0	1	4	44	4	0	345	232	2	3	5	43	133	12	1365
1080349: Saccharomyces eubayanus	0	0	1	0	0	0	0	1	2	4	1	12	0	2	0	0	0	0	2	0	0	0	14	5	0	0	1	105	97	0	0	0	0	2	0	0	0	4	0	0	16	12	0	1	0	4	5	0	124
4893: Saccharomycetaceae	8	78	6	6	53	27	75	132	77	125	99	1886	74	32	5	89	160	65	83	95	14	8	966	589	76	90	157	4354	8068	9	8	16	13	38	6	2	24	520	18	7	2168	3177	145	11	20	347	952	88	7737
4892: Saccharomycetales	16	14	13	13	122	77	124	220	47	121	85	621	61	15	23	73	755	204	55	345	85	69	591	163	97	140	58	586	1907	11	6	6	56	31	14	16	31	622	26	5	610	207	60	46	21	2505	289	101	2079
417290: Saccharopolyspora erythraea prophage pSE211	5	9	2	4	119	0	5	8	20	6	4	127	1	18	8	5	0	7	5	2	0	0	39	9	3	12	18	13	0	0	7	4	7	7	0	2	7	3	1	4	0	1	0	20	0	2	0	3	5
1230341: Salimicrobium jeotgali	4	0	7	12	34	1	42	7	9	3	22	11	18	5	4	8	0	9	4	3	27	12	11	7	20	0	1	12	5	0	0	2	2	0	5	0	98	14	4	5	1	0	0	3	2	0	0	14	53
407035: Salinicoccus halodurans	2	24	4	10	119	0	10	12	17	6	7	30	5	28	4	2	0	0	4	1	0	0	0	1	2	2	2	1	1	1	2	1	0	2	3	2	10	20	2	0	0	0	4	4	3	6	1	4	266
369723: Salinispora tropica CNB-440	1	0	0	0	7	0	4	10	2	2	3	7	0	1	0	1	0	0	0	0	0	0	0	2	2	2	0	0	0	0	0	0	1	0	0	0	1	9	0	1	0	0	0	2	0	0	0	1	19
218493: Salmonella bongori NCTC 12419	0	0	0	0	0	0	0	0	0	0	0	0	0	0	0	0	0	0	0	0	0	0	0	0	0	0	0	0	0	0	0	0	0	0	0	0	0	1	0	0	0	0	0	0	0	0	0	0	0
59201: Salmonella enterica subsp. enterica	0	1	1	0	4	0	0	4	0	1	0	0	0	3	0	3	0	0	1	2	1	0	1	0	0	0	5	0	0	0	0	0	0	0	0	1	1	1	0	0	0	0	0	0	1	0	0	1	1
446469: Sanguibacter keddieii DSM 10542	2	1	34	4	40	1	17	18	31	18	17	30	8	10	5	3	0	13	30	6	0	2	5	23	8	12	34	3	1	1	2	2	33	0	2	0	3	25	2	28	1	4	1	20	2	2	5	9	43
984262: Saprospira grandis str. Lewin	2	2	7	14	26	0	3	16	5	3	11	75	1	5	2	13	1	16	71	2	4	0	53	6	4	5	1	3	2	9	2	4	1	10	1	3	26	2	4	2	0	0	41	2	13	5	0	3	1
1150468: Scardovia inopinata JCM 12537	1	0	0	13	27	5	26	33	1	6	8	65	10	0	2	17	286	0	0	1	0	0	6	5	0	39	18	1	3	0	0	19	2	0	7	0	11	3	4	12	3	0	0	7	0	32	7	10	24
322104: Scheffersomyces stipitis CBS 6054	0	4	1	0	15	5	0	10	2	20	6	0	0	1	0	3	31	2	1	0	0	0	11	0	0	2	3	5	3	0	0	1	0	0	0	0	0	5	0	0	0	16	1	5	0	4	3	5	2
284812: Schizosaccharomyces pombe 972h-	8	19	12	12	56	63	69	365	45	118	186	104	6	10	7	60	17	46	16	149	84	23	385	8	44	110	19	309	26	12	5	1	44	13	6	0	13	92	6	62	8	10	41	43	13	680	113	135	338
526218: Sebaldella termitidis ATCC 33386	775	50	302	5157	627	29	1090	1477	1299	512	1599	3340	6865	1041	961	531	0	904	1472	77	1074	105	1268	1188	4041	230	439	1064	1826	150	385	427	1934	2333	190	448	5003	3593	403	503	34	21	155	529	124	280	54	138	6032
1543721: Sedimenticola thiotaurini	1	1	1	1	2	0	1	3	8	0	0	3	1	0	3	0	0	1	3	1	0	0	6	1	1	4	0	2	0	0	0	2	0	0	2	0	5	23	0	0	0	0	1	0	9	1	0	0	0
1453352: Sediminicola sp. YIK13	0	0	0	4	4	0	0	0	2	0	0	0	0	0	0	0	0	0	0	0	0	0	0	0	0	1	0	0	0	0	0	0	0	0	0	0	3	3	1	0	0	0	0	0	0	0	0	0	1
640132: Segniliparus rotundus DSM 44985	0	0	2	1	9	2	2	4	3	0	1	8	0	1	0	0	0	0	2	0	0	0	2	5	0	5	0	0	1	1	0	1	0	1	0	0	3	1	0	1	0	0	0	1	0	4	0	0	2
909929: Selenomonadales	0	1	0	3	2	0	0	0	4	0	2	2	0	0	0	2	6	5	0	1	3	1	0	0	5	0	0	1	0	18	1	0	0	4	5	3	4	2	0	0	0	5	3	0	0	4	4	0	0
970: Selenomonas	1384	108	1231	1236	4365	831	7122	1158	986	5417	2298	2035	2452	754	1110	464	864	1468	8976	287	2956	451	4227	1003	11329	2075	787	795	939	243	115	1127	10132	1826	532	561	2592	17768	1524	2525	166	255	41	1066	142	2257	272	3321	11295
927704: Selenomonas ruminantium subsp. lactilytica TAM6421	81	40	163	307	1041	13	258	506	551	226	780	705	436	467	116	567	98	226	98	22	153	13	463	246	345	173	190	435	3	55	2	162	91	7	76	143	566	564	102	91	38	29	1	128	100	238	48	876	658
712528: Selenomonas sp. oral taxon 126	113	7	80	49	74	6	132	62	83	149	52	72	81	25	321	12	13	33	109	17	61	9	260	24	180	184	17	20	7	5	2	14	1049	76	7	6	61	455	27	58	8	16	2	35	30	79	39	97	194
713030: Selenomonas sp. oral taxon 136	214	144	458	417	1091	41	1408	1038	3965	1673	4373	1990	1479	663	803	748	814	500	1165	696	398	238	1592	1370	2791	969	798	1099	301	781	546	242	964	1197	387	420	893	3099	479	328	312	129	145	587	469	959	101	782	2743
712538: Selenomonas sp. oral taxon 478	201	22	420	302	800	17	1604	82	296	2271	596	682	576	73	52	142	39	512	88	40	729	133	665	252	1273	283	239	72	25	16	9	37	1332	95	99	41	470	3532	459	840	12	26	6	476	5	734	26	360	3173
1884263: Selenomonas sp. oral taxon 920	234	15	145	66	345	29	756	85	234	387	178	366	284	101	125	75	52	79	349	17	394	65	420	116	1726	336	84	134	84	83	4	76	619	431	31	55	290	2451	214	171	16	42	27	129	40	135	38	153	603
546271: Selenomonas sputigena ATCC 35185	210	14	131	62	751	63	442	400	119	480	680	151	169	180	150	60	145	132	222	79	215	13	469	188	330	724	118	697	39	7	0	36	440	27	32	12	254	1411	143	109	19	179	3	95	24	121	109	1105	35
1936081: Seonamhaeicola sp. S2-3	4	0	6	58	17	0	0	51	2	3	4	41	0	3	11	25	0	44	29	0	4	1	91	23	12	3	4	0	7	20	24	4	1	15	86	3	21	1	2	2	0	0	15	3	10	8	0	4	7
1758689: Serinicoccus sp. JLT9	18	0	4	3	47	2	20	6	2	12	101	31	10	4	4	4	1	20	0	1	9	0	6	27	9	20	1	7	2	1	4	2	7	1	0	0	14	21	2	14	0	1	0	12	0	5	3	8	23
1334564: Serratia marcescens SM39	0	0	0	0	0	0	0	0	0	0	0	0	0	0	0	0	0	0	1	0	0	0	0	0	0	0	0	1	0	0	0	0	0	0	0	0	0	2	0	0	0	0	0	0	0	0	0	0	0
22: Shewanella	0	3	0	34	34	0	12	24	11	46	9	9	13	2	2	13	0	4	9	13	27	0	18	3	3	1	3	2	2	1	1	0	1	0	2	0	4	2	0	1	1	0	15	13	10	1	0	2	6
399599: Shewanella baltica OS195	0	0	0	0	0	0	0	0	0	0	0	0	0	3	0	0	0	0	3	0	0	0	0	0	0	0	0	0	0	0	0	0	0	0	0	0	0	1	0	0	0	0	0	0	2	0	0	0	0
93973: Shewanella japonica	0	0	0	0	2	0	0	0	0	2	3	0	0	0	0	11	0	0	0	0	0	0	1	0	0	0	0	1	0	0	0	0	0	1	0	0	0	6	0	0	0	0	0	2	0	0	0	0	3
398579: Shewanella pealeana ATCC 700345	0	1	0	0	1	0	0	0	0	0	0	0	0	0	11	0	0	0	0	0	0	0	3	0	0	0	1	0	0	0	0	0	0	0	0	0	0	1	0	0	0	0	0	1	0	0	0	0	0
319224: Shewanella putrefaciens CN-32	0	0	0	0	2	0	0	2	0	1	0	0	0	0	0	0	0	0	0	0	2	0	0	0	2	0	1	1	0	0	0	0	0	0	0	0	0	1	0	0	0	0	0	0	0	22	0	0	0
351745: Shewanella sp. W3-18-1	3	29	15	14	28	0	0	0	9	6	2	10	8	7	1	0	0	0	3	6	8	0	0	22	71	2	3	53	2	1	0	0	4	0	1	0	7	18	0	6	0	0	1	36	22	0	0	3	12
1086030: Shigella flexneri 5a str. M90T	1	2	2	1	2	1	2	0	0	0	2	2	1	1	0	3	0	0	0	0	0	0	0	0	0	0	0	2	0	0	0	0	0	1	0	0	0	1	0	2	0	0	0	1	0	0	0	0	0
1454006: Siansivirga zeaxanthinifaciens CC-SAMT-1	1	0	1	0	4	0	0	1	1	0	4	2	1	0	0	2	1	0	3	2	1	0	2	0	0	2	4	0	0	0	1	0	1	0	0	2	2	2	0	0	0	1	1	2	0	0	0	2	0
580332: Sideroxydans lithotrophicus ES-1	5	34	1	5	46	3	8	93	16	36	51	17	11	88	12	43	0	9	84	1	30	0	7	9	102	0	26	4	1	32	6	1	1	0	13	0	6	39	0	1	0	0	51	15	72	0	0	20	4
886293: Singulisphaera acidiphila DSM 18658	0	21	6	1	2	1	2	0	3	6	3	0	1	1	0	2	0	8	0	3	0	5	2	2	0	3	4	2	1	2	1	0	0	1	1	0	2	1	3	0	0	2	0	13	0	0	3	1	0
37927: Sinomonas atrocyanea	143	6	96	588	156	907	18	169	24	43	92	104	157	66	39	30	12	16	1516	3	33	2	149	25	65	70	35	18	12	27	12	265	11	43	16	163	65	147	136	9	13	894	5	39	54	72	2	20	85
471855: Slackia heliotrinireducens DSM 20476	0	0	1	2	6	4	1	1	0	3	1	3	4	0	0	2	3	0	9	2	0	0	6	1	2	12	9	18	0	0	2	4	0	5	0	0	12	15	2	11	0	0	3	17	1	12	0	2	6
187101: Sneathia amnii	216	23	141	521	147	0	153	223	341	199	406	1276	564	278	188	90	0	555	358	8	304	42	419	213	1497	82	209	189	310	44	143	107	442	212	76	107	589	1914	120	95	3	1	35	138	42	55	4	60	4973
1196094: Snodgrassella alvi wkB2	179	1370	188	223	2386	49	348	4643	717	341	1191	5252	688	5134	1494	804	0	674	14668	190	850	35	210	288	1647	40	855	1002	1558	5220	8086	61	421	88	1045	1320	4058	2298	0	15	22	0	3816	780	2094	34	31	336	178
929556: Solitalea canadensis DSM 3403	4	17	23	39	36	0	29	29	33	13	248	49	27	39	235	115	1	5	68	9	36	0	23	12	42	2	21	17	1	40	3	11	4	1	2	2	22	39	1	4	0	0	2	81	21	0	2	24	36
1254432: Sorangium cellulosum So0157-2	0	1	0	1	1	0	0	0	0	1	0	4	0	0	0	2	2	1	0	0	0	0	0	0	0	2	2	0	1	0	0	0	0	1	0	0	0	1	1	1	0	0	1	0	0	0	1	1	4
147550: Sordariomycetes	5	25	12	24	34	62	39	57	72	89	184	37	28	38	34	82	66	91	42	103	19	27	81	20	92	70	113	119	14	4	4	2	10	6	12	9	7	87	12	5	5	3	112	28	37	23	88	66	131
479434: Sphaerobacter thermophilus DSM 20745	0	0	0	0	0	0	0	0	0	0	1	0	1	1	0	27	0	0	0	0	0	0	1	0	0	1	0	0	1	0	0	0	0	0	0	0	0	1	0	0	0	0	0	0	0	1	0	1	1
158189: Sphaerochaeta globosa str. Buddy	0	0	4	4	3	0	2	0	0	1	0	2	1	4	0	1	5	0	0	0	0	0	1	2	2	16	2	5	0	0	0	0	3	0	1	2	0	2	0	0	0	0	36	0	2	0	0	2	4
84566: Sphingobacteriaceae	8	16	8	18	74	2	24	42	55	11	10	664	14	55	11	14	4	197	35	5	8	20	105	27	153	21	41	12	27	59	4	2	11	25	18	27	72	303	6	12	5	0	30	27	9	3	0	37	21
28453: Sphingobacterium	0	0	3	1898	5	0	4	2	27	2	6	33	1	0	7	0	0	0	2	0	8	0	3	3	83	1	2	2	0	445	8	0	0	14	0	0	876	393	0	0	0	0	0	5	0	0	0	1	7
743722: Sphingobacterium sp. 21	9	4	21	12	16	0	17	0	22	9	12	2	21	0	6	4	2	2	0	0	3	0	3	2	3	0	1	9	0	0	1	0	0	0	1	1	4	4	0	0	0	0	0	50	1	0	4	2	22
1933220: Sphingobacterium sp. B29	0	2	5	10	8	0	2	7	2	2	4	4	0	0	2	5	2	6	3	0	4	1	4	2	2	3	1	1	1	8	0	0	0	1	0	0	3	12	0	6	0	0	0	7	10	0	0	5	3
1538644: Sphingobacterium sp. ML3W	7	26	84	334	7	1	10	66	12	11	234	256	18	128	18	21	1	4	53	2	160	4	235	133	25	6	45	7	135	54	131	2	8	101	45	21	221	215	1	2	5	0	0	114	76	0	0	5	886
165695: Sphingobium	1	1	0	1	2	1	0	4	2	6	1	6	0	0	2	4	0	0	0	5	0	0	2	2	1	1	0	4	0	0	0	0	0	0	0	0	1	1	0	0	0	0	2	0	0	0	1	4	0
41297: Sphingomonadaceae	2	6	2	3	10	20	6	11	3	14	9	6	1	6	4	12	2	11	6	16	2	6	5	1	3	5	8	2	0	1	0	1	0	5	2	2	35	6	0	2	1	4	10	9	7	2	6	7	2
204457: Sphingomonadales	2	17	2	4	3	88	3	3	4	15	3	0	0	5	2	11	2	10	2	11	0	4	9	1	3	6	13	5	3	1	2	0	1	1	5	0	7	5	1	0	1	1	3	4	7	0	12	14	1
13687: Sphingomonas	1	4	1	1	4	20	6	5	4	11	5	4	0	7	1	4	0	6	2	4	1	1	3	3	1	10	1	5	3	1	0	1	1	0	1	0	2	6	2	0	1	2	5	8	7	0	5	8	2
1920127: Sphingomonas sp. ABOJV	0	0	0	0	0	3	1	1	0	1	1	1	0	3	2	0	1	1	0	1	0	0	0	0	0	0	1	1	0	0	0	0	0	0	0	0	0	1	0	0	0	0	1	0	0	0	0	3	0
1921510: Sphingomonas sp. JJ-A5	0	0	0	0	0	3	0	0	3	0	0	0	0	0	0	0	0	0	0	0	1	0	0	0	0	0	0	0	0	0	0	0	0	0	0	0	0	1	0	0	0	0	0	0	0	0	0	5	0
1549858: Sphingomonas taxi	0	0	0	0	0	7	0	2	2	1	0	0	0	1	0	0	0	0	0	2	1	3	0	1	0	2	1	1	1	3	2	0	0	3	2	0	0	1	0	0	0	0	0	0	0	0	1	3	0
1335757: Spiribacter curvatus	0	0	0	0	0	0	0	0	0	0	0	0	0	0	0	0	0	0	0	0	0	0	0	1	1	0	1	1	0	0	0	0	0	0	0	0	0	1	0	0	0	0	0	0	0	0	1	0	0
889378: Spirochaeta africana DSM 8902	3	1	3	2	0	170	12	11	8	1	2	2	2	0	1	1	0	0	11	0	4	1	3	1	3	1	1	0	2	1	3	9	8	1	3	2	11	5	1	0	1	0	0	12	9	0	0	16	14
665571: Spirochaeta thermophila DSM 6192	0	0	0	1	4	2	1	1	0	6	1	0	0	0	0	0	3	2	0	2	0	0	1	1	1	1	1	0	1	1	0	14	0	5	0	0	1	18	0	0	0	1	2	3	6	0	0	0	2
137: Spirochaetaceae	5	0	0	6	11	0	3	3	3	3	1	0	2	3	2	1	5	4	1	68	7	1	4	5	5	0	0	11	2	0	11	0	0	0	2	1	12	2	0	10	5	1	1	4	15	1	0	3	1
136: Spirochaetales	0	0	0	0	2	0	0	0	1	0	2	0	1	0	0	1	2	0	0	0	0	0	2	0	0	0	0	0	1	0	0	0	0	0	0	0	0	1	0	0	0	0	0	0	0	0	0	0	0
2132: Spiroplasma	0	4	1	11	55	0	7	15	11	2	4	4	4	9	1	5	1	5	1	1	3	0	4	1	4	1	0	2	6	2	0	1	1	6	2	0	10	8	1	0	2	1	3	133	4	1	0	5	1
1114980: Spiroplasma atrichopogonis	0	0	0	0	0	0	1	1	0	0	0	0	0	1	0	0	0	0	0	0	0	0	0	0	0	0	0	0	0	0	0	0	0	0	0	0	0	1	0	0	0	0	0	0	0	0	0	0	0
1276227: Spiroplasma chrysopicola DF-1	2	1	0	0	2	1	2	0	0	1	0	0	2	0	0	2	1	0	0	0	0	0	1	1	1	0	1	1	0	0	0	0	0	0	0	0	2	2	0	1	0	0	0	0	0	0	0	1	0
1276246: Spiroplasma culicicola AES-1	0	5	0	0	5	0	0	3	2	0	2	1	0	1	4	0	0	0	0	0	0	0	4	3	0	0	1	0	0	1	0	0	0	0	1	0	2	8	0	0	0	0	1	2	1	0	0	0	0
743698: Spiroplasma eriocheiris CCTCC M 207170	0	0	0	0	1	0	1	0	0	0	0	0	0	0	0	0	0	0	0	0	1	0	0	0	0	0	2	0	0	0	0	0	0	0	0	0	0	3	0	0	0	0	0	2	0	0	0	0	0
838561: Spiroplasma mirum ATCC 29335	0	2	0	0	4	0	0	0	0	0	0	1	0	0	0	0	0	0	0	0	0	0	0	1	3	0	0	0	0	0	0	1	0	0	0	0	0	2	0	1	0	0	0	0	0	0	0	0	0
216946: Spiroplasma turonicum	0	0	0	0	12	0	6	15	2	0	5	20	0	40	20	15	1	1	5	1	8	0	1	0	2	0	6	4	1	2	7	0	1	6	1	1	8	3	0	1	0	0	1	1	12	0	0	1	1
107: Spirosoma	0	0	0	4	1	0	4	0	2	1	4	0	2	2	0	0	0	0	1	1	0	0	1	1	0	0	0	0	1	2	0	0	0	0	1	0	1	3	0	0	0	0	1	0	0	4	0	0	0
1211326: Spirosoma aerolatum	1	1	4	15	47	0	9	49	8	5	6	66	4	177	22	27	1	53	529	0	0	0	153	56	45	15	0	13	1	17	0	6	5	3	0	25	108	33	0	17	0	0	10	44	42	12	0	9	0
1379870: Spirosoma radiotolerans	3	1	4	10	49	0	6	51	8	2	13	47	4	8	19	21	0	43	121	2	11	3	137	32	14	8	1	1	2	16	17	1	2	32	1	10	64	1	4	13	0	0	2	3	29	11	2	1	0
564064: Spirosoma rigui	0	0	4	2	2	0	2	2	1	10	1	1	0	0	0	2	0	2	0	0	0	3	1	3	1	0	10	0	0	0	0	0	0	0	0	0	5	1	0	0	0	0	0	0	0	0	0	0	1
1569: Sporosarcina	2	2	0	5	16	0	2	1	3	6	6	2	0	1	4	69	1	3	2	0	0	0	0	0	0	1	0	0	0	0	0	0	0	1	0	0	1	9	0	1	0	0	0	1	0	0	0	5	1
446470: Stackebrandtia nassauensis DSM 44728	2	0	0	4	15	0	7	1	13	3	8	2	1	1	0	1	0	0	3	0	0	0	2	9	5	0	0	1	0	0	0	0	2	0	0	0	1	3	5	11	0	2	0	2	1	1	0	10	15
90964: Staphylococcaceae	3	4	2	3	16	1	1	6	6	11	31	14	12	4	13	7	0	43	3	3	1	0	2	2	13	1	3	0	0	2	0	3	0	4	3	2	14	4	0	2	0	0	2	0	2	0	2	4	15
1849491: Staphylococcaceae bacterium S31	37	90	35	245	1077	1	262	209	466	210	367	290	57	809	224	129	20	1315	161	21	29	12	296	129	112	33	262	199	11	4	21	18	2	27	33	20	142	18	1	14	1	0	56	83	214	0	75	135	68
1279: Staphylococcus	9	30	27	97	99	2	75	42	55	32	72	49	82	15	57	58	1535	13	82	13	20	1	36	21	77	31	37	78	3	21	12	12	16	15	11	16	75	86	16	12	40	1	1353	26	37	16	19	39	70
1280: Staphylococcus aureus	5	21	6	125	267	1	15	23	85	14	85	29	18	2	29	22	70	6	19	7	2	4	11	14	9	22	15	21	0	1	1	3	0	3	34	2	75	1	0	3	2	1	39	7	98	3	5	23	5
273036: Staphylococcus aureus RF122	0	0	0	0	0	0	0	0	0	0	0	0	0	0	0	0	0	0	0	0	0	0	0	0	0	0	0	0	0	0	0	0	0	0	0	0	0	1	0	0	0	0	0	0	0	0	0	0	0
46170: Staphylococcus aureus subsp. aureus	0	0	1	6	9	0	0	0	9	0	3	6	2	0	1	1	0	0	0	0	0	0	0	4	1	2	0	0	0	0	0	0	0	0	1	1	4	1	0	0	0	0	0	0	1	0	0	0	3
93061: Staphylococcus aureus subsp. aureus NCTC 8325	0	0	0	3	1	0	0	0	1	2	1	0	0	0	0	0	0	0	0	0	0	0	0	0	1	0	0	0	0	0	0	0	0	0	0	0	0	1	0	0	0	0	0	0	0	0	0	0	0
1281: Staphylococcus carnosus	0	1	0	1	1	0	4	2	1	2	9	2	0	0	1	2	0	1	2	0	0	1	1	0	1	0	0	0	0	1	0	1	0	0	0	0	3	1	0	0	0	0	2	0	0	0	0	4	0
70255: Staphylococcus condimenti	0	3	0	9	14	0	2	1	4	1	7	2	1	11	8	1	3	6	0	0	1	0	19	1	5	0	4	3	2	1	1	0	0	0	1	0	1	1	1	0	1	0	182	1	0	0	0	7	2
1282: Staphylococcus epidermidis	2	2	0	5	10	0	7	6	61	5	11	11	3	5	6	4	1	0	4	0	0	0	5	1	1	2	1	11	1	0	0	1	0	2	0	0	1	2	0	1	1	0	245	1	21	1	2	9	9
308465: Staphylococcus epidermidis RP62A phage SP-beta	0	0	0	4	2	0	2	0	0	0	0	0	1	0	2	0	0	13	0	0	0	0	1	6	1	1	0	2	0	0	0	0	0	1	0	2	0	2	0	2	2	0	29	1	0	0	1	0	1
246432: Staphylococcus equorum	1	1	11	21	81	0	6	2	28	10	23	17	9	2	4	6	3	2	5	0	3	0	10	0	3	0	1	7	0	0	0	2	0	0	0	0	18	13	0	1	0	0	0	1	4	0	0	3	0
1283: Staphylococcus haemolyticus	7	47	1	196	824	2	63	69	282	57	184	76	28	20	29	72	5	3	70	3	0	0	41	29	16	6	31	44	2	0	0	0	0	25	0	0	63	5	0	2	1	0	4	32	29	0	19	54	23
279808: Staphylococcus haemolyticus JCSC1435	1	3	2	4	12	0	0	7	0	0	3	5	1	2	1	2	0	0	0	0	0	0	5	0	1	0	0	2	0	0	0	2	0	1	0	21	2	1	0	0	0	0	3	4	0	1	1	6	2
28035: Staphylococcus lugdunensis	1	0	3	3	11	0	0	2	3	13	7	8	3	7	10	55	1	0	3	0	0	2	5	0	6	1	6	0	0	0	0	0	0	0	2	0	1	1	0	0	1	0	15	2	0	0	0	7	1
1266717: Staphylococcus pseudintermedius E140	0	0	0	0	2	0	0	0	1	2	1	0	0	0	0	1	0	0	0	0	0	0	0	0	0	0	0	1	0	0	0	0	0	0	0	1	0	2	0	0	0	0	0	1	0	0	0	0	0
984892: Staphylococcus pseudintermedius ED99	1	6	15	79	130	0	8	14	16	5	27	150	66	12	11	104	1	6	30	1	3	0	12	12	10	2	8	31	11	12	13	39	3	16	4	20	59	63	0	3	2	0	13	8	3	0	0	5	4
29385: Staphylococcus saprophyticus	3	6	17	21	88	4	16	26	33	10	36	72	40	26	18	31	25	17	14	1	5	7	26	15	12	15	9	17	4	46	18	24	7	26	3	27	27	21	6	12	14	1	16	9	8	3	3	9	4
1286: Staphylococcus simulans	3	13	5	21	51	0	4	53	31	20	111	22	4	20	14	20	3	23	4	13	4	0	17	3	5	21	32	16	0	0	3	6	0	1	1	2	18	7	4	3	10	0	43	11	12	0	2	56	10
1194526: Staphylococcus warneri SG1	0	0	0	3	0	0	0	4	1	0	1	0	0	1	1	0	0	0	0	0	0	0	0	0	0	1	0	0	0	1	0	0	0	0	0	0	1	1	0	0	0	0	26	0	1	1	1	2	0
1288: Staphylococcus xylosus	12	14	6	110	93	2	45	31	64	30	9050	54	330	617	56	94	2	4	85	3	21	13	4	34	21	43	18	10	1	4	4	37	3	7	2	8	22	122	6	5	10	16	7	87	19	23	16	16	24
1793721: Stenotrophomonas sp. KCTC 12332	0	0	0	0	0	0	0	0	0	0	0	0	0	0	0	0	0	0	0	0	0	0	0	0	0	0	0	0	0	0	0	0	0	0	0	0	0	2	0	0	0	0	0	0	0	0	0	0	0
519441: Streptobacillus moniliformis DSM 12112	202	20	164	192	142	4	80	198	139	125	344	336	388	101	99	124	3	230	46	32	201	25	392	252	626	12	57	113	121	70	9	76	1616	164	36	40	644	667	126	95	6	2	17	156	36	25	23	24	1671
1300: Streptococcaceae	3841	8311	9804	558	13346	204	14760	12179	7745	10336	2243	14275	6715	7361	7096	7985	2085	6267	2470	1002	2160	1246	2755	7547	4803	9600	490	2256	1087	2068	798	1701	863	6625	994	1933	6636	15739	2962	2905	1645	5047	991	6672	2210	3436	806	6694	2231
1301: Streptococcus	109883	702536	109253	374595	2223282	5260	210126	233373	329166	145210	247618	553771	222363	98196	54184	161059	35370	61542	119737	27393	81990	39409	99855	158312	98040	199975	52806	87346	22229	55058	21706	71976	27527	262276	18174	34721	235034	201338	34693	44358	26144	44866	26550	72075	230370	43593	47014	201287	112525
1311: Streptococcus agalactiae	657	944	479	2158	6467	20	1245	770	1910	582	2306	2553	935	255	433	5261	421	176	136	100	84	76	140	1003	369	893	372	156	66	309	26	439	286	601	62	70	640	721	312	100	38	85	55	196	380	465	200	1166	1872
1309807: Streptococcus agalactiae ILRI005	1	14	2	6	65	0	4	1	18	9	11	12	10	0	0	7	0	0	1	0	1	0	0	2	1	1	0	1	0	0	0	0	0	2	0	0	1	3	0	1	0	3	0	1	3	0	3	5	3
1328: Streptococcus anginosus	245	243	892	1209	6021	56	79	257	491	792	221	1118	310	646	347	3292	2292	220	683	347	336	206	765	493	445	579	772	1263	95	123	90	474	46	466	81	29	470	377	156	445	36	441	40	431	374	303	517	1668	139
862970: Streptococcus anginosus C1051	24	246	138	431	751	19	60	130	205	179	69	401	95	67	36	1385	126	18	138	21	23	10	182	84	49	280	22	61	11	34	9	56	12	68	5	7	90	128	56	61	8	111	4	60	226	67	49	168	47
862971: Streptococcus anginosus C238	25	38	43	64	155	5	11	27	33	49	14	70	41	10	24	63	116	4	41	8	11	4	47	53	21	59	15	72	22	17	0	21	0	10	1	8	35	21	6	5	6	13	2	43	17	5	17	77	15
671232: Streptococcus anginosus group	43	77	260	330	4397	212	102	240	238	428	283	534	143	318	302	695	1871	34	862	86	98	68	1091	115	137	579	135	597	94	67	33	300	12	55	36	80	115	294	220	584	107	320	71	146	117	89	238	554	116
1353243: Streptococcus anginosus subsp. whileyi MAS624	11	18	110	87	480	6	41	18	26	64	22	98	52	40	37	61	73	6	40	13	2	5	63	28	11	12	6	159	4	14	2	54	2	23	5	14	37	5	3	15	5	20	3	12	25	5	27	398	4
184250: Streptococcus constellatus subsp. pharyngis	476	20	67	124	1404	192	67	27	243	33	47	88	50	27	40	427	1100	60	1101	50	121	10	541	146	83	90	33	85	31	45	9	84	2	401	18	46	106	525	49	17	107	572	47	19	1864	9	32	51	5
862969: Streptococcus constellatus subsp. pharyngis C1050	9	3	3	28	27	19	8	20	17	4	10	18	12	25	7	41	53	4	75	1	4	2	128	12	13	10	6	14	6	3	1	10	0	28	7	9	7	7	14	11	16	57	11	2	7	4	3	17	9
696216: Streptococcus constellatus subsp. pharyngis C232	4	3	21	4	29	40	6	122	30	10	7	34	2	39	17	24	18	4	29	1	0	0	70	9	8	27	2	1	1	1	0	2	4	4	0	1	4	13	7	1	2	16	4	19	27	2	1	14	7
862968: Streptococcus constellatus subsp. pharyngis C818	59	27	22	85	175	36	15	51	345	53	53	55	21	36	19	87	92	18	187	3	23	11	139	22	26	27	11	68	13	11	11	21	4	41	16	9	22	127	35	12	24	48	26	10	72	7	10	45	29
1302863: Streptococcus cristatus AS 1.3089	2597	572	466	1835	15290	21	619	2246	2184	693	1465	1625	369	2805	845	3099	364	3601	371	139	1079	62	902	1300	3083	1402	422	685	74	184	41	90	44	1244	69	75	571	1364	102	521	159	45	254	170	2962	127	190	3768	4090
1334: Streptococcus dysgalactiae	1	2	3	5	35	0	2	2	5	1	0	5	0	0	0	3	1	7	0	0	0	0	1	1	3	1	2	1	0	3	0	0	0	5	0	0	7	10	0	0	1	0	1	1	7	1	0	5	3
119603: Streptococcus dysgalactiae group	0	7	5	0	6	0	1	2	1	0	1	4	0	0	0	2	0	0	0	6	0	0	3	2	6	1	3	0	3	0	12	0	0	0	0	3	1	2	0	0	2	3	1	3	0	0	0	3	1
663952: Streptococcus dysgalactiae subsp. dysgalactiae ATCC 27957	1	5	4	17	56	0	15	11	15	18	9	52	2	8	1	197	2	1	2	1	1	1	0	3	0	5	2	0	0	2	0	0	1	8	0	0	7	6	0	0	1	20	2	1	3	2	0	8	8
486410: Streptococcus dysgalactiae subsp. equisimilis GGS_124	0	13	1	10	111	0	3	4	23	2	7	18	3	1	2	18	0	5	0	1	0	0	4	1	3	3	0	0	2	3	0	0	3	3	0	0	0	4	1	0	1	0	0	2	1	4	1	0	6
617121: Streptococcus dysgalactiae subsp. equisimilis RE378	13	34	15	9	40	2	22	112	24	11	41	113	30	12	15	49	0	415	2	11	2	2	11	13	12	12	12	4	0	9	1	6	3	8	1	5	36	15	27	5	5	9	1	34	13	9	4	21	7
1336: Streptococcus equi	6	8	6	14	33	0	4	6	15	3	2	40	17	6	6	1	8	15	3	0	3	0	1	0	6	12	3	10	0	0	7	3	1	1	0	2	14	1	10	0	2	3	3	3	73	0	2	8	15
553482: Streptococcus equi subsp. equi 4047	0	4	1	11	12	0	10	4	3	0	0	7	1	3	1	377	0	1	44	5	0	1	5	7	3	5	0	1	0	6	0	0	1	2	3	1	7	2	3	1	2	1	1	1	18	2	2	10	7
40041: Streptococcus equi subsp. zooepidemicus	3	22	98	11	108	1	2	30	26	8	22	50	3	10	1	18	1	2	7	2	3	4	6	6	3	40	1	10	4	3	1	10	0	11	1	2	14	8	9	0	2	5	0	12	9	1	1	12	7
1051072: Streptococcus equi subsp. zooepidemicus ATCC 35246	1	4	1	4	5	0	1	5	7	1	5	13	2	0	1	1	0	2	4	1	0	0	0	1	2	1	0	0	0	0	0	1	1	1	0	0	4	1	0	1	0	1	0	0	1	3	0	7	1
1403449: Streptococcus equi subsp. zooepidemicus CY	0	1	2	7	11	1	1	4	5	0	0	8	2	1	0	0	1	0	1	1	6	3	2	3	3	1	0	1	0	8	3	4	1	31	1	22	13	15	2	3	0	1	0	5	21	0	0	0	1
315405: Streptococcus gallolyticus	1	3	1	72	4423	0	11	16	32	48	22	27	22	5	11	10	2	5	5	3	23	6	58	235	5	15	11	6	2	4	1	9	1	38	2	1	477	7	0	2	2	2	2	7	14	0	2	5	3
637909: Streptococcus gallolyticus UCN34	9	8	9	21	354	1	6	9	18	5	12	41	19	4	3	29	0	5	6	0	6	2	3	9	9	3	3	4	2	3	0	7	0	10	1	2	16	15	0	14	2	8	2	8	5	4	7	9	6
53354: Streptococcus gallolyticus subsp. gallolyticus	8	4	4	11	39	0	56	47	13	36	67	21	6	24	10	10	4	0	2	2	5	1	20	6	8	22	4	26	2	2	1	2	1	5	1	0	12	15	0	13	7	2	1	1	9	0	8	25	69
981539: Streptococcus gallolyticus subsp. gallolyticus ATCC 43143	1	2	7	15	122	0	16	21	8	8	37	14	4	9	3	13	2	3	4	1	1	4	2	2	2	8	4	1	1	3	2	2	1	4	1	2	7	4	0	1	2	0	0	1	7	1	2	9	22
990317: Streptococcus gallolyticus subsp. gallolyticus ATCC BAA-2069	0	1	2	2	15	0	6	4	95	7	4	3	0	1	3	5	0	1	1	1	1	1	1	1	6	19	0	0	0	1	0	0	0	11	1	0	3	2	0	3	0	0	1	2	6	2	0	5	4
1258574: Streptococcus gallolyticus subsp. gallolyticus DSM 16831	3	26	9	9	32	0	163	15	12	15	355	24	4	3	1	12	2	19	2	3	4	2	6	7	21	9	9	2	1	4	0	2	2	9	2	2	25	7	2	2	3	5	2	5	8	6	9	21	6
1302: Streptococcus gordonii	955	5717	1440	17296	73928	151	1736	6095	16159	2197	3565	6050	2978	13960	468	1903	832	886	1085	409	2226	4409	4099	1915	1209	5441	337	1874	330	939	179	1244	497	4626	78	131	3577	1816	502	10171	1155	180	1209	1164	10812	244	1437	4602	2575
467705: Streptococcus gordonii str. Challis substr. CH1	644	194	330	1308	3544	16	318	2323	1389	552	426	1231	193	2020	229	1360	20	361	173	118	294	233	637	521	417	942	69	621	66	256	126	88	50	632	62	72	757	261	66	1253	201	36	162	384	969	31	250	1907	257
1814128: Streptococcus halotolerans	17	51	15	58	164	0	69	89	69	73	43	44	12	9	3	32	7	8	25	5	1	2	8	14	16	55	11	9	0	1	0	7	4	22	2	1	53	39	12	1	1	3	8	21	79	29	6	104	16
1888195: Streptococcus himalayensis	107	80	121	817	1883	6	68	75	643	250	68	116	509	384	68	147	65	30	28	6	199	30	59	76	74	4447	26	83	12	31	12	22	4	370	6	18	156	99	14	19	9	10	8	42	279	13	9	238	133
102684: Streptococcus infantarius	0	12	6	11	55	11	7	27	22	9	18	29	8	27	3	12	14	3	10	0	2	1	6	13	8	42	2	4	0	7	0	5	2	15	1	1	13	10	1	7	2	1	1	11	13	8	1	69	9
1069533: Streptococcus infantarius subsp. infantarius CJ18	45	11	48	18	84	9	63	41	76	91	89	233	9	3	14	16	44	29	63	4	6	33	51	10	3	37	6	7	8	4	0	28	2	7	0	2	11	33	10	14	12	9	7	18	16	59	38	146	85
1346: Streptococcus iniae	4	25	9	11	87	0	12	25	43	92	46	115	20	254	8	14	0	5	5	0	5	5	13	13	11	9	7	6	5	5	0	9	5	57	6	2	6	15	8	0	1	13	2	6	15	2	20	15	10
1338: Streptococcus intermedius	319	195	1197	1101	2657	110	406	348	1169	94	900	1740	107	91	158	376	242	16	611	14	21	56	226	88	126	2226	31	117	9	15	16	34	2	3464	7	20	299	430	84	32	44	59	48	77	170	9	57	407	93
862967: Streptococcus intermedius B196	463	51	229	228	2236	345	64	88	417	49	86	913	89	100	67	551	1453	13	410	55	39	44	559	42	132	1037	19	546	34	21	3	80	7	218	9	14	276	102	143	30	69	265	103	25	95	85	114	545	32
862966: Streptococcus intermedius C270	9	30	60	77	209	16	44	115	139	55	82	72	30	33	12	57	64	2	29	16	10	6	57	12	46	75	5	20	5	8	3	6	8	78	3	0	52	63	26	2	37	18	12	12	32	8	5	47	36
591365: Streptococcus intermedius JTH08	14	49	19	33	243	16	42	547	219	21	58	1470	48	31	14	133	35	7	22	3	4	10	65	36	48	178	11	84	2	9	6	9	8	36	5	6	358	482	17	5	9	53	3	15	25	13	4	578	24
1076934: Streptococcus lutetiensis 033	2	17	5	4	513	0	2	16	26	11	9	11	8	10	4	7	1	2	3	1	1	0	4	4	7	2	2	1	1	3	1	1	0	25	0	0	9	7	0	3	3	2	0	1	8	1	3	7	5
1116231: Streptococcus macedonicus ACA-DC 198	10	5	1	10	24	0	10	22	12	1401	9	37	53	15	53	5	6	4	2	5	4	2	139	28	26	17	2	14	1	4	1	1	6	62	1	15	50	64	7	17	1	1	0	1	12	7	1	9	10
1825069: Streptococcus marmotae	116	132	22	427	1142	3	76	262	580	129	124	421	23	178	47	264	51	36	24	11	20	93	90	117	104	151	20	75	23	26	40	17	3	198	8	7	1168	223	12	33	19	12	72	11	304	9	24	319	35
28037: Streptococcus mitis	11323	26115	5352	11895	20606	12	14118	46437	29747	48335	69647	7415	1029	11238	9175	36363	154	1685	2948	1200	1935	567	4340	2979	7886	35974	10468	4503	572	469	430	533	110	2194	439	246	11875	893	211	486	8230	76	10090	6834	17438	130	2413	17091	38410
365659: Streptococcus mitis B6	951	3557	2166	3749	10541	7	2774	6954	41042	23316	29776	4697	397	2256	1191	3376	293	1227	11433	1606	108	323	4044	2060	2827	4906	1460	1258	340	647	106	1989	516	267	747	451	3216	578	278	219	2117	40	1005	4298	1576	22	501	3162	8684
1309: Streptococcus mutans	24	86	440	64	507	413	135	825	91	403	132	173	476	86	30	109	3840	615	31	59	26	8	2136	60	68	3682	11	4	7	70	18	36	10	203	2	1	105	145	3379	232	396	68	8	97	61	149	205	300	246
1198676: Streptococcus mutans GS-5	0	2	11	0	4	23	1	31	0	12	2	4	19	0	0	8	79	15	0	0	0	1	85	5	6	116	0	0	0	3	0	0	0	1	0	0	1	3	133	10	8	1	0	7	0	3	1	3	5
1155071: Streptococcus mutans LJ23	1	4	91	0	22	24	12	19	9	33	52	11	7	0	4	14	1766	258	1	6	0	0	111	8	9	470	0	1	3	2	0	2	1	21	0	1	27	15	204	32	9	0	0	0	3	32	8	13	20
511691: Streptococcus mutans NN2025	1	7	28	15	25	38	0	16	8	25	4	16	27	3	2	7	1306	70	9	6	1	1	100	3	7	541	1	11	9	1	0	6	0	33	0	0	5	3	143	13	8	0	1	4	8	11	6	24	20
210007: Streptococcus mutans UA159	1	8	16	1	15	15	4	33	3	45	62	11	26	4	23	0	175	18	0	1	17	0	301	2	11	161	1	1	0	3	0	2	0	7	0	0	6	2	251	12	18	1	1	0	1	12	2	7	14
1437447: Streptococcus mutans UA159-FR	1	15	16	4	42	21	3	45	22	28	2	12	61	1	3	0	212	30	0	7	0	0	167	2	1	247	1	3	0	6	0	2	0	57	2	0	12	2	275	15	11	0	0	0	16	1	5	8	8
1303: Streptococcus oralis	319	1064	1167	1845	23025	4	1529	3145	2635	1717	5451	51912	793	945	411	1942	169	21895	787	225	110	105	358	1669	367	12326	792	379	100	221	57	141	36	346	169	35	888	761	258	166	481	80	177	367	1839	139	358	16344	2025
927666: Streptococcus oralis Uo5	352	1398	1693	5345	3259	25	1533	1909	3883	904	2177	3177	91	466	229	4179	160	210	150	156	56	75	284	860	305	1172	1066	217	49	164	38	49	58	891	49	54	602	208	158	44	248	44	289	140	6679	36	126	3706	4985
1811193: Streptococcus pantholopis	19	86	14	931	650	0	28	86	822	23	163	60	29	26	13	114	8	8	47	2	16	2	26	61	18	20	4	92	2	5	2	64	10	514	1	3	106	78	2	12	8	4	15	21	113	14	13	48	22
1318: Streptococcus parasanguinis	1847	3708	3394	15734	10125	122	3178	5701	6229	6340	6491	7919	3679	1066	1027	23153	354	1703	481	309	959	3964	572	2125	2957	7912	992	1053	67	471	47	296	399	2251	26	72	2294	3501	809	1324	214	136	10	519	1052	1112	535	8133	9441
760570: Streptococcus parasanguinis ATCC 15912	2008	4516	3453	15091	148502	128	4561	4492	13427	8529	7033	8720	2719	1459	2004	71675	1011	3234	238	435	1188	1195	893	2206	4280	5696	1840	511	224	503	396	3549	526	2818	111	329	2559	5224	1371	1910	478	222	64	766	1959	598	588	9083	6863
1114965: Streptococcus parasanguinis FW213	2742	3143	3256	27071	13899	163	4380	4984	11669	8127	9363	8047	5596	1543	799	45679	1927	1984	2600	565	4644	1652	817	21039	3211	5404	1704	548	109	630	118	467	388	5154	125	165	8800	8281	1418	2600	476	283	26	822	7840	553	607	9204	8788
1348: Streptococcus parauberis	1	1	1	0	63	0	6	9	83	1	5	18	3	0	2	1	2	0	0	1	3	0	3	1	2	15	0	1	1	0	0	0	0	1	0	1	1	7	0	0	0	0	0	0	1	6	0	12	4
936154: Streptococcus parauberis KCTC 11537	10	0	3	1	33	2	8	9	11	5	3	17	4	1	6	6	2	3	0	3	12	9	1	1	23	7	0	0	0	1	2	0	0	31	0	0	2	14	0	14	0	0	0	0	46	0	0	3	2
873447: Streptococcus parauberis NCFD 2020	2	14	5	1	149	1	23	472	18	1	13	32	72	0	3	31	6	4	0	2	0	0	1	26	4	6	0	1	1	3	0	3	4	3	0	1	4	6	0	0	3	1	0	0	9	4	0	78	2
981540: Streptococcus pasteurianus ATCC 43144	3	11	3	53	232	0	4	14	139	16	2	66	2	2	2	7	1	2	6	0	1	5	0	2	5	6	2	17	2	2	0	1	2	8	0	1	175	7	1	1	3	5	0	2	21	3	2	12	3
370563: Streptococcus phage 10270.5	0	12	0	1	0	0	1	3	0	1	4	6	0	0	1	4	0	3	4	1	1	2	0	1	0	0	0	2	0	0	2	0	0	3	0	0	10	7	0	1	0	0	0	1	0	2	2	2	1
472966: Streptococcus phage NZ131.3	82	13	25	35	12	0	5	19	65	0	9	22	1	8	0	27	0	0	1	2	3	1	2	5	1	0	0	24	7	55	14	0	0	22	1	1	7	40	0	0	0	0	0	0	8	0	0	5	8
890041: Streptococcus phage PhiSpn_200	1938	165203	247	6	576	0	2243	142559	34	961973	9820	45	2	1530	103	53	6	15	18390	17	4	203	372	22	401	144	38	156	109	5	1	6	9	7	27	1	13	11	10	10	459	2	30	7686	54	1	54	1759	164
1566990: Streptococcus phage SpSL1	4	3	0	1	0	0	3	0	0	0	10	0	0	0	1	0	0	0	0	4	0	0	13	0	27	0	0	5	0	0	0	0	0	0	8	0	0	5	1	0	3	0	0	1	7	0	2	0	1
1701827: Streptococcus phage phiARI0468-1	0	0	0	0	0	0	0	1	0	0	0	0	0	0	0	8	0	0	0	0	0	0	0	0	0	0	0	0	0	0	0	0	0	0	0	0	0	1	0	0	0	0	0	0	0	0	0	0	0
1313: Streptococcus pneumoniae	744	11071	13077	3628	12548	21	21096	43565	8751	35461	105461	12911	1314	9546	2397	6353	1307	4602	4778	4329	1524	516	9091	6805	5682	4261	8181	2436	2260	2076	1449	1621	369	1906	2155	1149	9736	4313	540	669	5196	190	19290	7932	15603	215	5266	12693	6658
189423: Streptococcus pneumoniae 670-6B	0	28	1	13	11	0	31	58	22	24	81	9	7	8	9	5	0	6	9	4	2	2	6	12	16	5	10	3	6	6	4	3	4	1	3	2	52	14	1	1	4	2	4	10	13	0	0	31	9
488221: Streptococcus pneumoniae 70585	2	22	1	1	15	0	12	40	3	27	67	12	2	4	3	2	2	3	6	9	0	0	14	4	7	10	27	2	3	4	2	1	1	7	5	2	14	5	2	3	7	1	24	6	11	0	1	19	14
1408179: Streptococcus pneumoniae A026	74	5	4	3	11	0	5	48	627	7	44	58	8	18	4	4	0	6	2	3	0	2	17	21	17	2	0	4	0	5	5	2	1	3	1	3	11	5	0	4	3	1	8	4	14	0	6	16	2
561276: Streptococcus pneumoniae ATCC 700669	1	8	0	16	15	0	56	44	10	53	97	20	2	15	3	10	0	4	15	6	3	0	10	7	16	14	12	2	7	3	2	2	0	5	2	2	37	8	2	1	11	0	8	10	11	4	3	32	7
516950: Streptococcus pneumoniae CGSP14	3	55	6	4	22	0	19	57	8	24	36	21	1	8	1	62	1	28	70	7	1	1	19	4	7	25	11	0	6	6	3	2	0	3	13	1	9	2	2	1	7	0	9	1	9	0	6	31	3
373153: Streptococcus pneumoniae D39	4	26	16	6	13	0	44	156	11	28	594	25	9	26	41	19	0	13	204	12	0	3	29	39	26	10	17	3	1	10	11	13	1	23	3	14	9	15	2	0	43	3	19	6	31	0	8	16	5
512566: Streptococcus pneumoniae G54	13	101	14	18	190	0	83	130	60	107	82	230	3	165	57	79	96	44	82	134	12	3	160	55	24	192	15	115	2	100	10	20	10	3	463	17	109	179	232	8	80	8	49	17	46	22	17	72	17
487214: Streptococcus pneumoniae Hungary19A-6	3	56	11	9	69	2	25	290	270	1434	272	26	1	225	82	9	3	13	14	27	1	6	23	63	47	36	85	58	2	7	2	15	18	5	29	13	31	8	3	5	18	7	62	26	39	6	34	109	32
869269: Streptococcus pneumoniae INV104	2	13	2	0	35	0	50	31	5	44	87	43	6	8	7	30	3	21	2	5	1	2	9	10	20	7	17	1	1	25	1	3	1	6	5	1	16	4	0	3	66	0	37	4	3	8	4	34	11
869216: Streptococcus pneumoniae INV200	4	36	2	14	21	0	18	64	11	29	97	7	1	8	17	25	1	7	10	5	2	1	4	10	17	8	14	5	3	2	5	3	0	0	1	0	24	14	0	0	6	0	6	17	24	0	1	31	5
488222: Streptococcus pneumoniae JJA	6	5013	464	4	43	0	36	75	22	63	120	6	3	12	5	855	4	30	7	10	2	0	9	9	12	13	14	444	0	11	1	3	1	2	2	0	14	2	47	4	18	2	69	14	17	0	8	41	14
488223: Streptococcus pneumoniae P1031	1	14	6	7	11	0	16	15	6	20	150	13	1	5	8	13	0	7	20	1	1	7	33	6	17	8	9	2	0	5	0	6	1	2	2	3	20	8	0	1	14	0	13	3	17	2	1	26	14
1159083: Streptococcus pneumoniae PCS8235	1	13	3	5	14	0	6	10	4	51	22	10	0	9	7	2	2	2	8	4	0	1	2	6	14	6	5	1	4	1	0	1	0	0	4	0	0	3	1	1	2	0	8	1	6	0	0	12	10
171101: Streptococcus pneumoniae R6	2	7	23	0	58	0	53	86	23	13	33	10	4	20	3	2	3	2	6	17	2	1	5	6	7	10	9	1	0	6	2	6	2	2	11	0	12	3	0	1	15	0	14	7	11	0	4	6	7
869311: Streptococcus pneumoniae SPN032672	0	14	2	8	34	0	19	34	376	120	20	26	20	4	2	8	2	7	19	4	0	15	4	2	9	7	2	2	1	11	0	0	0	7	2	0	14	2	4	0	7	0	15	1	7	0	2	179	5
869312: Streptococcus pneumoniae SPN033038	3	26	21	16	139	0	4	69	9	24	34	22	2	6	6	11	2	4	4	5	3	0	11	4	17	8	11	1	0	2	1	2	0	0	1	2	30	18	1	1	10	0	11	7	665	2	1	21	11
869303: Streptococcus pneumoniae SPN034156	4	8	7	2	11	0	23	73	6	51	68	13	2	7	0	13	0	11	8	0	2	0	17	11	24	15	5	1	0	4	5	1	0	0	1	2	13	3	1	0	11	1	913	1370	23	0	4	2165	22
869304: Streptococcus pneumoniae SPN034183	3	99	45	9	132	0	10	105	93	1273	476	29	2	192	186	96	3	498	394	428	9	5	577	108	910	609	5	166	479	400	42	12	7	8	947	26	676	2	2	8	424	3	649	360	296	1	255	785	195
869306: Streptococcus pneumoniae SPN994038	2	4	14	3	24	0	1	3	2	2	7	1	1	0	2	2	0	4	2	0	1	0	11	1	4	2	0	0	0	1	0	0	0	1	0	0	3	2	0	0	13	0	21	12	3	0	0	23	1
869307: Streptococcus pneumoniae SPN994039	0	1	0	9	158	0	13	22	43	24	74	1	7	2	0	10	0	3	4	2	0	0	6	2	3	12	6	0	0	0	0	0	0	0	3	0	6	1	0	0	0	0	4	4	31	0	2	1	0
869309: Streptococcus pneumoniae SPNA45	4	49	20	5	23	0	273	89	37	75	393	24	1	12	13	105	1	147	18	22	3	1	9	8	18	4	7	7	20	2	1	6	1	5	2	1	33	8	5	1	313	5	190	43	21	0	22	51	17
1130804: Streptococcus pneumoniae ST556	10	20	6	7	29	0	30	26	22	46	132	43	1	18	18	7	0	39	14	4	1	10	16	5	14	17	4	3	5	28	1	0	2	13	5	14	25	1	11	1	9	124	33	3	140	2	7	14	12
525381: Streptococcus pneumoniae TCH8431/19A	2	20	8	9	39	0	12	50	42	18	30	16	7	6	1	38	0	3	2	0	0	0	3	3	6	5	7	1	3	7	1	5	1	1	3	0	8	5	0	2	5	0	2	3	8	0	2	18	4
170187: Streptococcus pneumoniae TIGR4	2	26	196	16	20	1	25	1132	11	107	1359	25	5	26	480	1109	1	25	20	11	3	5	34	10	53	24	29	8	7	19	7	9	111	10	17	5	29	82	1	2	50	3	16	51	38	1	4	93	27
487213: Streptococcus pneumoniae Taiwan19F-14	1	25	4	1	19	0	20	32	23	1522	87	34	1	9	5	3	3	7	6	15	3	0	10	11	32	0	18	19	1	1	1	3	1	3	10	2	8	3	1	0	15	0	33	12	51	0	10	11	6
697283: Streptococcus pneumoniae gamPNI0373	0	11	4	5	29	0	16	41	3	31	54	8	0	6	0	4	0	6	8	4	2	0	7	7	7	2	2	1	1	6	1	1	1	2	7	0	9	1	1	3	7	1	21	10	3	0	19	28	12
1054460: Streptococcus pseudopneumoniae IS7493	269	2196	1482	397	2013	13	3549	11506	1283	17357	7564	2990	153	482	586	561	87	1099	1614	430	93	122	1309	604	1146	534	820	792	82	113	83	89	49	45	344	69	1741	43	53	101	1268	81	299	1784	862	68	1168	4802	9781
1314: Streptococcus pyogenes	69	34	12	31	421	3	13	41	70	19	37	56	18	75	6	20	26	11	12	4	3	1	21	27	17	40	14	9	3	35	2	1	4	191	2	16	252	657	8	7	3	70	12	66	49	95	6	15	59
1048264: Streptococcus pyogenes HKU QMH11M0907901	0	0	0	0	2	1	0	0	5	0	0	3	2	0	0	0	0	29	0	1	0	0	0	0	0	0	0	0	0	0	0	0	2	0	0	0	0	12	0	0	0	0	0	0	0	0	0	0	0
1207470: Streptococcus pyogenes M1 476	0	6	1	5	31	0	9	4	10	2	2	6	5	1	1	2	1	0	0	1	3	0	0	0	0	2	0	0	0	1	1	0	0	1	1	0	0	2	0	0	0	0	1	0	4	0	0	1	3
1304: Streptococcus salivarius	8665	101023	92437	1463	289743	229	67595	152473	100014	38897	47298	160608	51876	3538	1687	581	4714	9634	1528	2103	8920	4032	7973	34765	42825	48514	5204	5159	996	3692	2888	12749	8336	42489	1430	3665	32975	41615	10443	3844	3897	13614	127	8396	9764	9974	8568	81568	30636
1048332: Streptococcus salivarius CCHSS3	130	1956	2459	54	7656	12	2033	3616	724	4951	2820	7263	3044	228	40	54	111	1020	27	235	1357	455	2009	2403	1160	1225	286	388	38	479	53	615	1268	458	191	129	1195	861	859	142	153	594	12	409	85	336	212	7239	3564
347253: Streptococcus salivarius JIM8777	539	1322	1743	401	6358	9	6340	2488	1181	2220	3481	6621	1535	210	33	76	470	1329	698	114	407	217	309	976	1383	1406	120	13048	146	412	33	568	272	1596	54	72	508	1727	396	545	150	430	45	242	147	778	438	4341	2953
388919: Streptococcus sanguinis SK36	177	1717	1475	1035	36595	39	1476	3455	16111	959	2612	908	289	2293	125	9031	29	501	7818	234	405	70	6797	1458	281	465	312	6513	188	313	113	48	27	684	60	63	817	1716	199	284	287	65	195	942	6556	323	227	3121	64
1759399: Streptococcus sp. A12	1686	28439	4100	159188	29045	30	1653	8745	497009	5532	4966	6428	3320	9615	2002	4933	111	802	720	480	1128	491	1675	3841	780	1754	1056	2194	323	370	1300	125	387	4311	229	129	1525	850	1853	176	110	68	180	2102	11183	60	263	3115	1319
1839799: Streptococcus sp. FDAARGOS_192	380	4837	18955	213	11232	14	1670	1702	769	1828	2020	5100	2824	270	47	172	191	1986	129	75	536	155	268	1820	1638	1738	167	124	80	975	11	304	228	2130	61	53	1262	1617	363	642	153	624	20	217	3997	602	360	1543	623
1156431: Streptococcus sp. I-G2	1387	1915	967	22120	22215	32	8390	8218	15304	1865	2347	3799	1452	6629	1164	6027	125	507	807	177	2176	137	1542	14085	889	2609	1166	2692	174	451	378	107	116	4301	131	96	6114	433	640	166	94	70	101	416	53417	102	154	1271	996
1156433: Streptococcus sp. I-P16	1962	1557	2740	14962	7694	21	5328	6490	33942	2338	5748	2869	1107	4033	3300	1597	137	654	672	281	1049	242	1006	2629	375	7806	462	1443	174	491	308	118	149	3201	270	89	1183	537	204	178	206	134	150	908	3849	220	233	1133	884
712624: Streptococcus sp. oral taxon 064	1202	2470	1778	1923	6384	14	4529	16626	1788	7768	19425	1302	809	5544	1393	15006	1880	891	1421	981	856	1174	2662	10954	4150	4552	1211	1508	590	1815	1969	1525	306	676	404	366	4528	2100	1195	162	5530	305	379	8292	4135	678	575	4491	4605
712633: Streptococcus sp. oral taxon 431	15151	2382	2206	7492	4357	18	4547	9487	30458	3981	6945	6189	1012	3605	1119	3161	204	835	483	408	616	196	1257	714	1490	1534	1826	824	153	580	259	193	230	492	380	132	7377	1372	108	180	565	41	159	854	7024	23	340	1903	4688
1307: Streptococcus suis	773	924	559	3196	1998	12	592	1408	1189	289	751	799	289	460	186	1178	163	285	212	87	248	64	230	800	302	510	143	244	113	180	47	34	46	274	42	314	673	1582	40	94	45	79	24	109	649	103	170	1180	1889
672190: Streptococcus suis 05HAS68	0	0	0	0	0	1	0	1	0	1	0	2	0	0	0	0	0	2	0	0	0	0	0	1	1	1	0	0	0	0	0	0	1	0	0	0	0	1	0	0	0	0	0	0	0	0	0	0	0
1214179: Streptococcus suis 6407	0	35	3	5	216	0	3	6	10	3	11	7	7	3	1	3	2	2	2	0	2	0	3	2	6	28	1	0	0	1	0	0	2	4	1	0	35	77	3	2	2	5	1	0	2	2	6	3	1
993512: Streptococcus suis A7	1	1	0	1	1	0	0	0	1	1	0	1	0	1	0	3	0	0	0	0	0	0	0	0	0	0	0	1	1	2	1	0	0	1	0	2	0	1	0	0	0	0	0	1	1	0	0	1	0
568814: Streptococcus suis BM407	0	0	0	0	0	0	1	0	0	0	2	0	0	0	0	0	0	0	0	0	1	0	1	4	0	0	0	0	0	0	0	0	0	0	0	0	0	1	0	0	0	0	0	1	0	0	0	0	2
1004952: Streptococcus suis D12	5	24	2	3	90	0	2	3	49	5	24	66	6	2	2	6	5	4	1	0	0	0	0	18	8	5	14	2	0	7	0	2	3	59	11	0	0	4	0	3	0	0	0	20	4	0	22	4	2
423211: Streptococcus suis GZ1	1	1	45	1	10	0	1	14	8	3	1	12	1	1	1	3	4	0	1	1	0	0	0	4	0	1	1	0	4	1	0	0	0	0	0	0	2	3	2	4	0	1	0	1	0	1	2	0	25
945704: Streptococcus suis JS14	1	3	0	6	2	0	0	2	2	0	7	1	1	0	2	1	0	0	0	0	1	0	0	2	0	0	0	2	2	6	1	6	5	4	3	1	0	5	0	2	0	0	0	0	2	0	1	1	2
218494: Streptococcus suis P1/7	1	24	1	0	17	0	0	1	0	1	0	2	0	1	0	7	0	0	1	0	0	0	0	1	1	1	2	1	5	1	0	0	0	1	0	0	0	2	0	0	0	0	0	2	0	0	0	13	0
1004951: Streptococcus suis ST1	12	8	5	0	24	0	1	3	5	1	18	8	16	0	0	3	2	1	2	1	0	0	0	4	4	13	2	2	1	6	0	0	0	2	1	0	1	3	1	2	0	0	0	0	5	0	3	4	0
1340847: Streptococcus suis T15	0	7	5	1	28	0	7	7	12	34	1	5	2	1	1	0	0	1	0	0	1	1	4	3	1	33	1	0	0	0	0	2	1	2	0	0	4	1	18	0	7	0	1	3	3	16	16	2	6
1276647: Streptococcus suis TL13	1	3	2	17	1	0	1	4	2	1	2	8	2	1	5	19	0	0	1	0	0	0	1	3	0	0	0	6	0	7	0	119	0	2	0	0	1	2	1	1	1	7	0	3	0	21	0	4	1
1308: Streptococcus thermophilus	896	2662	1600	321	5217	22	2690	2134	2488	1405	4497	8171	1502	537	146	152	2931	700	64	173	346	254	374	3720	1708	6593	137	177	113	367	57	1695	455	5071	104	202	1994	4453	1883	298	870	834	50	798	1072	2912	1431	1374	1035
1435981: Streptococcus thermophilus 1F8CT	0	22	100	1	170	0	7	42	17	16	23	24	22	2	1	0	3	1	0	1	9	2	3	18	16	52	0	11	0	4	0	3	2	8	1	3	14	9	14	7	5	2	0	1	3	8	23	31	5
1408178: Streptococcus thermophilus ASCC 1275	1	4	4	0	30	0	9	5	9	6	7	35	14	3	0	1	1	4	0	0	2	1	8	49	21	17	2	0	1	3	0	11	5	7	1	7	7	16	5	4	3	3	0	0	2	2	9	17	1
299768: Streptococcus thermophilus CNRZ1066	3	35	11	6	18	0	5	126	5	6	1	40	5	0	0	0	1	11	0	1	1	2	2	3	14	26	1	1	0	0	1	2	4	4	0	1	7	3	8	0	6	2	0	3	0	0	2	30	6
1091038: Streptococcus thermophilus DSM 20617	0	0	0	1	23	0	0	7	0	3	0	4	1	0	0	0	0	1	0	0	0	0	0	1	0	1	0	0	1	1	1	1	1	2	0	0	1	1	0	0	0	0	0	0	0	1	3	2	3
1051074: Streptococcus thermophilus JIM 8232	3	16	94	6	57	1	40	81	22	16	34	53	16	2	9	1	5	45	0	10	40	8	5	109	11	161	3	1	3	11	1	7	6	13	0	2	13	10	21	5	7	15	1	3	1	93	46	20	16
322159: Streptococcus thermophilus LMD-9	3	1	1	3	28	0	7	8	3	7	4	38	18	3	0	11	0	3	0	0	9	7	5	11	2	19	0	0	1	1	0	9	3	5	0	0	10	8	8	1	2	7	0	5	0	3	3	15	6
264199: Streptococcus thermophilus LMG 18311	2	20	6	1	20	0	3	222	4	3	5	21	12	1	1	0	0	11	1	1	17	2	21	16	5	46	2	1	0	3	0	93	4	3	0	1	3	4	13	1	10	4	0	0	1	2	3	34	4
1433289: Streptococcus thermophilus M17PTZA496	1	196	52	0	59	0	18	25	8	27	34	61	15	2	8	4	6	6	0	3	3	1	11	22	5	100	6	4	2	2	0	11	6	13	1	1	10	50	4	6	14	4	2	5	2	3	20	42	13
1187956: Streptococcus thermophilus MN-ZLW-002	44	37	167	4	255	0	129	201	44	77	236	569	162	61	1	1	346	581	2	1	440	162	12	1902	665	1134	26	253	179	773	0	24	325	506	1	177	543	712	57	294	12	100	0	15	28	93	32	981	1625
1433288: Streptococcus thermophilus MTH17CL396	2	21	15	0	114	1	22	7	2	61	14	130	21	3	0	0	5	7	1	1	4	0	21	7	14	47	3	1	5	20	1	27	17	12	0	5	13	82	23	1	3	10	0	1	7	11	5	32	14
767463: Streptococcus thermophilus ND03	2	59	4	7	119	0	9	30	37	8	8	61	30	12	1	10	1	2	1	0	1	7	3	24	11	17	0	5	2	3	0	9	5	14	0	0	20	9	15	2	3	2	0	15	7	3	3	15	13
1415776: Streptococcus thermophilus TH1435	1	20	3	2	40	0	6	27	8	13	5	128	67	1	2	2	3	6	0	0	9	3	1	15	5	19	0	0	1	1	0	13	0	8	1	0	7	13	5	0	4	6	2	2	2	7	4	8	10
1423145: Streptococcus thermophilus TH1436	1	26	18	2	65	0	276	70	7	28	5	178	89	12	0	0	6	38	0	2	21	10	9	98	41	54	8	6	0	6	0	30	10	47	0	4	16	33	28	15	7	13	0	13	0	14	20	61	43
1436725: Streptococcus thermophilus TH1477	10	17	11	5	68	0	12	54	7	17	15	46	17	15	0	1	4	8	0	7	3	2	5	19	9	32	2	2	3	2	2	38	6	18	0	0	26	12	12	1	8	3	0	7	5	24	83	16	16
1435974: Streptococcus thermophilus TH982	19	69	68	14	74	6	72	50	77	69	33	768	150	12	5	6	22	63	15	2	32	31	14	124	63	68	4	6	16	29	7	66	5	465	0	8	147	303	39	19	5	65	0	54	0	73	49	75	19
1435972: Streptococcus thermophilus TH985	6	32	30	1	55	0	54	34	10	385	16	77	38	2	3	1	3	12	2	1	15	4	6	23	9	40	11	2	1	2	1	20	4	6	1	6	6	17	15	7	7	16	0	5	0	4	5	29	6
218495: Streptococcus uberis 0140J	3	59	6	45	60	0	12	38	35	13	6	31	19	6	4	32	15	6	25	1	5	5	44	9	6	23	0	10	2	6	0	2	7	10	0	0	7	162	17	6	1	2	0	4	28	9	1	16	7
1883: Streptomyces	1879	7	30	34	220	4	54	68	74	36	120	136	18	47	49	37	19	67	21	22	15	6	75	105	28	36	127	16	11	9	17	18	63	8	17	5	24	160	149	53	6	9	6	119	3	41	12	46	284
1434306: Streptomyces albulus ZPM	1836	4146	3984	1951	5056	588	2513	5074	2250	3098	3492	3505	1970	2610	2202	5013	1239	2359	2092	1664	3086	918	5391	5667	5517	5893	3220	2862	2814	5207	2950	2842	5328	3104	2829	2631	4327	5030	2422	2274	1560	1124	1597	3717	1733	1325	1426	6543	11409
1888: Streptomyces albus	4	0	0	1	4	0	2	1	1	1	2	1	2	1	1	0	0	0	3	2	0	0	0	1	0	3	1	3	0	0	1	0	0	0	0	0	2	2	0	0	0	0	1	1	1	2	0	2	8
1889: Streptomyces ambofaciens	0	0	0	0	2	0	2	0	0	0	0	3	0	1	1	0	0	1	1	0	0	0	1	3	1	0	0	0	0	0	0	0	1	0	0	0	0	1	0	0	0	0	0	3	0	0	0	0	0
278992: Streptomyces ambofaciens ATCC 23877	0	0	0	0	7	0	0	2	0	2	3	0	0	0	0	1	0	0	0	0	0	0	1	3	0	0	0	0	1	0	0	0	0	0	0	0	0	1	0	0	0	0	0	5	0	0	0	1	0
1892: Streptomyces anulatus	5	1	1	1	2	0	0	0	3	1	0	1	0	0	0	0	0	0	0	4	0	0	0	1	0	0	3	0	0	0	1	0	1	0	0	0	0	3	1	0	0	0	0	1	1	0	0	0	3
75293: Streptomyces autolyticus	0	1	0	3	28	1	12	3	5	1	2	7	1	0	4	0	0	0	0	0	1	0	1	3	0	1	2	0	0	0	1	2	0	1	0	0	0	1	0	0	0	0	0	2	0	0	0	1	10
749414: Streptomyces bingchenggensis BCW-1	0	0	1	1	5	0	1	5	5	15	4	4	3	0	0	0	0	0	0	0	0	0	0	24	8	1	0	0	0	0	0	0	13	0	0	0	0	13	0	0	0	0	0	10	0	0	0	4	11
1003195: Streptomyces cattleya NRRL 8057 = DSM 46488	10	0	2	0	13	0	4	1	44	3	26	17	1	3	8	0	0	4	35	0	0	0	0	43	5	0	0	0	7	1	1	6	16	1	0	1	3	23	7	20	0	1	0	3	2	6	0	4	91
1901: Streptomyces clavuligerus	12	12	24	276	187	0	15	11	190	40	80	180	37	2	245	32	0	52	110	2	10	5	142	47	78	2	21	43	0	42	4	0	5	4	6	2	98	196	3	3	1	0	15	111	7	0	0	66	157
443255: Streptomyces clavuligerus ATCC 27064	2	1	1	0	13	1	0	0	11	1	3	3	0	0	0	1	0	0	0	0	0	0	0	2	3	0	1	1	0	4	0	2	1	0	0	1	0	1	0	0	0	0	0	2	0	2	0	0	13
477245: Streptomyces cyaneogriseus subsp. noncyanogenus	0	0	0	0	4	0	0	0	0	0	0	1	0	0	0	0	0	0	0	0	0	0	0	1	0	3	0	0	0	0	0	0	1	1	0	0	0	1	0	1	0	0	0	0	0	0	0	2	0
1214101: Streptomyces davawensis JCM 4913	0	0	1	0	2	0	0	0	0	1	0	3	1	1	3	0	0	0	0	0	0	0	0	1	0	0	0	0	0	0	0	0	2	0	0	0	0	1	0	0	0	0	0	0	0	0	0	1	3
1303692: Streptomyces fulvissimus DSM 40593	0	1	0	0	1	2	0	0	0	0	0	4	1	2	0	1	2	0	0	0	0	0	0	0	0	0	0	0	0	0	0	0	0	0	0	0	0	8	0	0	0	0	0	1	0	0	0	0	0
553510: Streptomyces gilvosporeus	0	0	0	2	7	0	0	1	6	0	2	2	1	0	0	0	1	1	1	1	2	0	0	1	0	5	0	0	0	0	0	0	0	0	0	0	1	1	0	0	0	0	0	4	0	0	0	4	5
1172567: Streptomyces globisporus C-1027	3	1	1	0	10	0	1	3	0	3	0	2	0	0	0	0	0	1	0	0	0	0	1	1	0	0	0	0	0	0	0	0	0	0	0	0	0	1	1	0	0	0	0	0	1	0	0	2	3
68214: Streptomyces griseochromogenes	0	2	0	0	11	0	2	1	2	1	3	1	0	1	0	1	0	0	0	0	0	0	0	0	0	0	0	0	0	1	0	0	0	1	0	0	0	2	0	0	0	0	0	1	0	0	0	2	1
311982: Streptomyces hygroscopicus subsp. jinggangensis	0	0	0	0	0	0	0	0	0	0	0	0	0	0	0	0	0	0	0	0	0	0	0	0	0	0	0	0	0	0	0	0	0	0	0	0	0	1	0	0	0	0	0	0	0	1	0	0	0
1437453: Streptomyces leeuwenhoekii	0	0	1	5	8	0	0	2	5	1	2	2	0	1	3	2	1	1	0	0	0	0	0	0	0	0	0	0	0	0	1	0	0	0	0	0	0	2	0	1	0	0	0	2	0	1	0	0	1
1915: Streptomyces lincolnensis	0	0	0	0	3	0	1	0	3	3	1	0	0	0	0	0	0	0	0	0	0	0	0	1	1	0	0	0	1	0	0	0	0	0	0	0	0	1	0	0	0	0	1	1	0	0	0	0	0
457428: Streptomyces lividans TK24	5	0	4	1	29	0	5	1	5	3	3	11	4	2	3	0	0	2	0	1	0	0	2	2	2	2	1	0	0	0	2	0	0	0	0	0	0	4	3	0	1	0	0	15	0	0	1	1	1
1352941: Streptomyces niveus NCIMB 11891	0	1	1	0	2	0	0	0	0	2	0	0	1	0	1	1	0	1	1	2	0	0	0	0	0	0	0	0	0	0	0	0	0	0	0	0	0	2	0	0	0	0	0	3	0	0	0	0	0
316284: Streptomyces noursei ATCC 11455	0	0	0	0	8	0	0	2	1	1	0	3	0	3	1	3	1	0	2	0	0	0	2	2	1	0	1	0	0	0	0	3	0	0	0	0	1	1	1	0	1	1	0	1	0	0	0	4	6
68249: Streptomyces pactum	2	1	0	0	17	0	0	3	0	1	0	2	0	0	0	0	1	0	2	0	0	0	1	1	1	2	0	0	0	1	1	3	2	1	0	0	1	3	0	0	0	4	0	1	0	1	0	3	16
591167: Streptomyces pratensis ATCC 33331	4	0	0	2	31	0	4	3	5	1	1	5	0	0	0	1	0	0	1	0	0	0	0	2	2	0	3	0	0	0	0	0	0	0	0	0	0	1	1	0	0	0	0	8	0	0	1	7	12
164348: Streptomyces puniciscabiei	0	0	0	0	5	0	1	0	0	0	0	0	0	0	0	0	0	0	0	0	0	0	0	0	0	2	0	0	0	0	0	0	1	0	0	0	0	1	0	0	0	0	0	0	0	0	0	1	2
680198: Streptomyces scabiei 87.22	0	2	0	3	2	0	0	1	0	1	0	0	0	1	0	0	0	4	0	0	0	0	0	1	0	0	0	0	0	0	0	1	2	0	0	0	0	1	0	0	0	0	0	0	0	1	0	1	1
545123: Streptomyces silaceus	3	0	0	1	20	0	3	3	12	3	3	5	0	3	0	0	21	2	0	1	0	0	0	3	0	6	2	0	0	0	1	0	1	0	0	0	1	2	1	0	0	0	0	1	1	2	0	5	9
1882757: Streptomyces sp. 3124.6	0	0	0	0	1	0	0	4	2	0	4	0	1	2	0	2	0	0	0	0	0	0	0	0	1	0	3	0	0	0	1	0	0	0	0	0	0	1	0	0	0	0	0	1	0	0	0	1	1
1751294: Streptomyces sp. 4F	0	1	0	1	16	0	0	0	2	2	0	2	0	3	0	1	0	0	1	1	0	0	0	1	1	0	0	0	0	0	0	0	0	0	0	0	0	3	0	0	0	0	0	3	0	3	0	1	4
1649184: Streptomyces sp. CFMR 7	0	0	0	0	2	0	2	0	2	0	0	2	0	0	0	0	0	0	0	0	0	0	0	0	0	1	0	0	0	0	0	0	0	0	0	0	0	1	0	2	0	0	0	0	0	1	0	0	4
444103: Streptomyces sp. CNQ-509	0	0	2	5	42	4	7	13	9	2	3	18	5	1	0	2	0	2	1	0	0	0	6	6	1	1	0	7	0	0	0	1	10	0	0	0	3	3	0	1	0	0	0	6	0	8	0	7	9
1218177: Streptomyces sp. GBA 94-10	0	0	0	0	1	0	2	1	0	0	1	1	0	0	0	0	0	0	0	0	1	0	0	0	0	1	0	0	0	0	0	0	0	0	0	0	0	1	0	2	0	0	0	0	0	0	0	0	0
1961713: Streptomyces sp. MOE7	0	0	0	0	1	0	0	0	0	0	0	1	0	0	0	0	0	0	0	0	0	0	0	0	0	0	0	1	0	0	0	0	0	0	0	0	0	1	0	0	0	0	0	0	0	0	0	0	0
1783515: Streptomyces sp. S10(2016)	0	0	1	0	7	0	0	0	0	4	0	0	0	0	0	0	0	2	0	0	0	0	0	1	0	1	0	0	0	0	0	0	1	0	0	0	0	1	0	0	0	0	0	0	0	0	0	0	0
355249: Streptomyces sp. Tu6071	1	3	3	0	10	0	0	2	1	5	0	1	0	0	0	1	0	0	1	1	1	0	0	0	1	2	1	1	0	0	0	0	1	0	0	0	0	2	0	0	0	0	0	0	0	3	0	4	0
1812480: Streptomyces sp. fd1-xmd	0	0	0	0	3	0	3	0	1	6	0	1	1	0	0	0	0	0	1	0	0	0	0	1	0	0	0	0	0	0	0	0	0	0	0	0	0	1	0	0	0	0	0	2	0	1	0	1	5
2062: Streptomycetaceae	2	1	1	6	9	0	4	1	2	0	2	8	1	8	6	3	7	2	2	0	0	1	36	7	2	6	1	1	0	1	0	0	1	1	0	0	1	7	0	1	0	1	0	1	0	3	1	2	7
479432: Streptosporangium roseum DSM 43021	0	1	2	2	8	0	0	1	0	2	0	7	0	0	0	2	0	0	0	0	0	0	0	2	0	2	1	0	0	1	0	0	1	0	0	0	0	1	0	0	0	0	0	3	1	1	1	3	2
796027: Sugiyamaella lignohabitans	0	10	0	2	4	17	32	12	4	13	66	3	1	5	1	24	77	6	6	9	3	0	243	6	16	15	12	147	15	1	0	2	10	4	4	0	16	11	7	0	6	0	10	19	12	46	4	8	54
709032: Sulfuricurvum kujiense DSM 16994	0	1	0	0	1	0	3	0	0	0	2	0	0	0	0	0	0	6	0	2	0	0	1	0	0	0	0	0	0	0	1	0	1	0	0	0	20	2	0	0	0	0	1	0	0	0	0	0	0
563040: Sulfurimonas autotrophica DSM 16294	0	1	1	0	3	0	2	0	2	0	0	0	0	1	0	0	0	2	0	0	0	0	0	0	0	0	0	0	0	0	0	0	1	1	0	0	0	1	1	0	0	0	0	1	0	1	0	0	4
1223802: Sulfuritalea hydrogenivorans sk43H	0	10	4	1	20	0	24	16	15	77	51	182	63	0	6	74	0	3	6	6	4	0	111	15	3	2	47	2	0	0	3	0	3	0	10	0	15	15	0	0	4	7	19	61	14	9	0	1	0
57665: Sulfurospirillum	0	1	0	1	8	0	2	0	10	1	0	0	1	2	2	0	4	1	1	0	0	0	2	1	5	0	0	0	0	1	0	0	0	0	0	0	1	4	0	0	1	1	0	0	0	0	0	10	1
366522: Sulfurospirillum cavolei	0	0	0	10	3	0	4	0	0	0	0	0	0	0	1	0	0	0	16	0	0	0	12	3	1	0	0	1	0	0	0	0	19	0	0	0	1	27	0	0	0	1	0	0	0	0	2	5	2
525898: Sulfurospirillum deleyianum DSM 6946	0	0	0	0	0	0	0	0	1	0	0	0	0	0	0	0	0	0	0	0	0	0	1	0	0	0	0	0	0	0	0	0	1	0	0	0	0	1	0	0	0	0	0	0	0	0	0	0	4
1193502: Sulfurospirillum halorespirans DSM 13726	0	0	0	0	1	0	0	0	1	0	0	2	0	0	0	0	0	1	0	0	0	0	1	0	1	0	0	0	0	0	0	0	0	0	0	0	0	2	0	0	0	0	0	1	0	0	0	0	1
1150621: Sulfurospirillum multivorans DSM 12446	0	0	0	0	1	0	0	0	0	0	0	0	0	0	0	0	0	0	0	0	0	0	1	0	2	0	0	0	0	0	0	0	0	0	0	0	0	3	0	0	0	0	0	0	0	0	0	0	3
1581011: Sulfurospirillum sp. UCH001	0	1	0	0	1	0	0	0	1	0	0	0	1	0	0	0	0	0	0	1	0	0	0	1	0	0	0	0	0	0	1	1	15	0	0	0	2	5	0	0	0	0	0	0	0	0	0	13	0
206403: Sulfurovum lithotrophicum	0	0	0	0	1	0	0	1	0	0	0	1	0	0	3	1	16	0	0	0	0	0	0	0	0	0	1	0	0	0	0	0	0	1	0	0	2	1	0	0	0	0	0	0	0	0	0	0	0
292459: Symbiobacterium thermophilum IAM 14863	0	6	1	4	8	1	0	2	1	0	3	1	0	3	5	0	0	2	1	0	0	0	2	0	0	3	1	1	0	0	1	0	0	0	0	0	1	2	0	0	1	0	55	1	0	0	1	1	1
1890426: Synechococcaceae	0	0	0	0	0	0	1	0	0	0	0	1	0	0	0	0	0	0	0	0	0	0	0	0	1	0	0	1	0	0	0	0	0	0	0	0	0	1	0	0	0	0	0	0	0	0	0	1	0
1129: Synechococcus	2	0	1	4	8	0	0	0	10	3	3	2	0	5	0	1	0	0	0	21	1	1	13	0	0	3	0	4	0	1	1	0	0	0	0	0	0	4	0	0	0	0	0	0	2	7	0	3	0
321332: Synechococcus sp. JA-2-3B'a(2-13)	0	0	0	0	1	1	0	23	6	0	2	7	0	0	1	0	0	0	0	6	0	12	5	0	0	2	0	0	0	0	0	0	0	0	0	0	1	42	0	0	0	0	0	0	1	29	2	58	10
321327: Synechococcus sp. JA-3-3Ab	0	0	1	0	0	0	0	5	0	0	1	1	0	0	0	0	0	0	0	1	0	2	2	0	0	0	0	0	0	0	0	0	0	1	0	0	0	8	0	0	0	0	1	0	0	12	0	6	1
1173263: Synechococcus sp. PCC 7502	0	1	1	0	0	0	0	0	0	1	0	0	1	0	0	0	2	0	0	2	0	0	0	0	0	0	0	1	0	0	0	0	0	0	0	0	0	3	0	0	0	2	0	0	0	3	1	4	2
32051: Synechococcus sp. WH 7803	0	0	0	0	0	0	0	5	0	0	0	0	0	0	0	0	0	0	0	0	0	0	0	0	2	0	0	0	0	0	0	0	0	0	0	0	0	1	0	0	0	0	4	0	0	0	0	0	1
649777: Synergistaceae	1	1	5	8	1	12	0	0	0	1	0	2	2	4	1	0	0	0	6	0	0	0	0	1	0	0	1	3	0	0	0	0	0	0	0	2	5	5	1	1	1	3	1	0	0	0	1	0	0
645991: Syntrophobotulus glycolicus DSM 8271	2	11	0	0	4	2	9	1	13	3	10	20	10	2	0	1	0	0	7	1	0	0	1	1	8	4	0	13	0	1	0	0	0	0	0	1	3	15	1	2	0	1	65	1	0	0	1	1	0
335541: Syntrophomonas wolfei subsp. wolfei str. Goettingen G311	0	0	2	2	6	1	7	1	3	2	5	6	5	0	0	1	2	2	2	0	0	0	0	1	2	4	2	1	0	3	0	0	1	1	0	0	3	15	1	0	0	0	15	1	2	8	1	3	7
643648: Syntrophothermus lipocalidus DSM 12680	12	10	35	16	60	10	57	16	8	5	2	57	20	0	14	5	1	21	88	0	43	5	78	57	99	2	8	5	9	3	7	33	72	23	7	18	94	202	1	2	0	1	0	3	1	11	6	3	23
195950: Tannerella	197	11	368	79	48	36	33	113	69	67	101	67	21	19	159	115	97	25	23	22	22	8	85	68	70	1443	21	256	42	10	13	9	45	10	18	4	205	58	4	20	27	4	11	35	20	0	38	594	2
28112: Tannerella forsythia	441	250	620	937	453	497	541	32	370	709	321	317	334	285	2182	217	876	96	119	205	7625	107	7697	210	1128	3529	1003	1008	182	38	18	8	105	25	21	120	936	264	460	123	309	499	11	12	206	33	559	1758	24
1307832: Tannerella forsythia 3313	57	27	50	213	89	42	143	61	108	128	234	81	51	68	460	14	275	18	134	77	222	13	219	45	154	483	34	193	103	163	56	1	87	25	28	186	507	365	74	42	41	27	8	23	105	8	3	172	11
203275: Tannerella forsythia 92A2	427	31	154	270	144	99	1119	195	80	1416	456	196	100	230	883	305	1159	39	385	113	2105	54	2230	61	265	1197	105	112	115	381	38	56	335	106	123	863	857	6418	164	81	774	16	87	49	198	36	29	381	488
1307833: Tannerella forsythia KS16	116	328	339	312	684	135	79	400	246	82	361	1349	138	501	949	615	1595	220	815	182	500	31	308	119	456	1968	253	504	431	95	130	27	127	46	207	266	1058	378	146	108	64	45	341	137	474	0	23	265	357
712710: Tannerella sp. oral taxon HOT-286	1420	65	243	846	590	131	402	3153	2074	245	2454	1451	188	162	6321	786	565	853	165	152	926	29	3205	643	563	304	170	930	724	76	583	54	4218	85	521	835	1944	1087	42	562	24	15	223	145	355	11	41	295	552
451: Tatlockia micdadei	0	0	0	0	1	0	1	0	1	0	0	0	0	0	0	1	0	0	0	0	0	0	0	0	0	0	0	3	0	0	0	0	0	0	0	0	0	3	0	0	2	0	0	0	9	0	0	0	1
1008459: Taylorella asinigenitalis MCE3	0	2	0	2	5	0	0	1	2	0	0	0	0	3	0	1	0	1	1	0	0	0	3	2	0	0	1	0	0	0	0	0	0	0	2	0	3	4	0	0	0	0	0	1	2	0	0	0	0
29575: Taylorella equigenitalis	6	2	5	4	19	0	23	2	10	0	13	19	29	0	2	3	0	0	0	0	0	0	0	9	2	0	0	0	0	0	0	0	0	0	6	0	17	11	0	0	0	0	0	0	26	0	0	7	0
743973: Taylorella equigenitalis ATCC 35865	1	1	2	2	8	5	0	3	0	0	1	1	2	3	0	3	0	2	0	0	2	2	0	2	5	0	1	5	0	7	13	0	0	0	1	0	2	4	0	0	2	0	0	0	4	0	0	2	0
377629: Teredinibacter turnerae T7901	31	189	52	66	602	3	17	478	701	55	68	188	144	73	210	50	0	11	47	6	9	8	100	41	14	11	23	65	1	5	0	0	2	66	4	1	259	339	7	48	1	5	29	65	394	24	3	135	1
1783272: Terrabacteria group	1361	487	676	1391	1549	70	834	1188	1363	457	1054	1884	593	1133	2265	699	174	320	2583	91	466	91	1459	850	1191	344	496	406	1015	673	756	261	559	1005	688	1973	5282	3935	893	495	116	90	166	580	209	24846	71	548	7176
586416: Terribacillus aidingensis	0	0	0	0	1	0	0	1	0	0	0	0	0	0	0	0	0	0	0	0	0	0	2	0	0	0	0	1	0	0	0	0	0	0	0	0	1	2	0	0	0	0	0	0	0	0	0	2	0
392734: Terriglobus roseus	1	0	0	0	1	1	1	0	0	0	3	0	0	0	1	0	0	1	1	0	2	0	0	1	2	0	2	0	1	0	2	0	4	0	0	0	1	17	0	1	0	0	0	3	0	0	1	0	15
72763: Tessaracoccus	2	9	1	7	7	0	2	1	7	1	20	3	7	20	6	87	0	5	13	0	0	0	32	24	12	5	3	2	1	0	0	27	7	4	1	0	9	5	0	2	1	3	30	8	19	2	7	4	12
399497: Tessaracoccus flavescens	12	25	7	24	48	0	22	12	17	8	35	53	35	21	17	7	0	2	31	4	1	0	9	24	8	6	2	2	0	0	8	1	5	2	2	0	20	21	1	13	1	1	26	14	20	4	4	8	15
1610493: Tessaracoccus flavus	4	7	3	42	18	0	5	3	77	4	15	14	5	5	10	19	2	9	23	3	1	0	13	21	6	14	5	12	2	4	0	3	5	2	1	5	7	7	1	16	1	3	6	8	6	2	20	1	30
1332264: Tessaracoccus sp. NSG39	7	28	14	6	29	6	13	6	13	3	17	35	20	33	22	83	1	14	34	4	29	0	86	33	16	9	10	6	6	18	4	19	21	3	15	23	23	13	3	35	1	6	24	54	15	3	10	9	22
1909732: Tessaracoccus sp. T2.5-30	8	23	8	6	32	2	3	20	45	12	36	57	37	56	21	102	1	10	66	1	3	0	183	65	32	12	17	14	4	4	11	8	5	1	8	12	20	14	9	30	1	1	71	57	32	6	34	7	19
51669: Tetragenococcus halophilus	1	7	0	8	13	0	1	5	6	0	4	6	7	1	2	1	1	6	1	2	0	0	2	3	1	13	0	2	0	0	0	0	0	2	0	0	42	1	0	1	0	0	1	0	0	1	1	1	0
1071380: Tetrapisispora blattae CBS 6284	0	2	0	1	48	2	1	4	8	10	40	3	6	3	0	0	7	11	2	19	0	0	79	1	1	2	7	7	32	2	0	0	0	0	0	0	1	2	0	0	2	5	1	1	0	9	1	19	20
1071381: Tetrapisispora phaffii CBS 4417	0	0	1	1	2	0	8	0	5	0	0	0	1	1	0	1	0	1	0	639	0	0	0	0	0	0	1	426	7	0	0	0	0	0	0	0	0	4	1	0	1	0	0	0	0	0	0	1	422
187493: Thalassolituus oleivorans	0	0	15	2	0	0	0	20	0	39	1	0	1	0	0	0	0	1	1	5	2	24	0	0	190	41	0	23	0	0	0	1	0	0	0	1	1	3	4	11	26	0	16	1	1	0	1	200	0
1298593: Thalassolituus oleivorans MIL-1	3	0	0	0	1	0	1	7	1	8	0	0	0	0	0	9	0	0	1	0	0	0	4	2	2	0	2	0	0	0	0	1	0	0	2	0	0	3	0	0	0	0	1	0	2	2	0	6	0
1208320: Thalassolituus oleivorans R6-15	4	3	10	0	0	10	66	21	13	58	0	0	11	0	82	0	0	0	5	0	7	0	0	0	12	2	79	11	0	66	232	9	1	4	3	10	116	1	0	2	1	0	16	0	0	43	0	3	57
1763536: Thalassotalea sp. LPB0090	0	0	0	0	0	0	0	0	1	2	2	0	0	3	0	1	0	0	0	0	0	0	3	0	1	0	1	0	0	0	0	0	0	1	0	0	1	2	0	0	0	0	0	0	0	0	0	0	0
96773: Thauera chlorobenzoica	0	0	0	0	13	0	1	1	1	2	1	0	1	0	0	8	0	1	1	2	0	0	2	0	0	1	0	0	0	0	0	0	2	0	1	0	2	1	0	0	0	0	0	2	4	0	0	1	0
1134435: Thauera humireducens	0	1	1	0	17	0	1	3	22	2	3	8	2	1	0	8	0	3	2	1	9	0	3	1	1	0	1	0	0	1	1	0	1	0	1	0	4	7	0	0	0	0	0	3	5	0	0	0	2
85643: Thauera sp. MZ1T	0	1	0	0	6	0	1	0	10	4	0	2	1	1	0	6	0	0	2	1	0	0	1	0	1	0	0	2	0	0	0	0	0	0	0	0	1	1	0	0	0	1	1	17	0	0	0	2	0
698762: Thermanaeromonas toyohensis ToBE	0	2	8	11	25	0	6	15	211	3	6	19	9	7	1	11	0	7	0	3	8	0	3	11	2	1	21	2	1	0	2	0	1	232	1	0	52	21	0	7	0	0	1	5	2	0	2	4	67
525903: Thermanaerovibrio acidaminovorans DSM 6589	0	0	1	0	8	5	3	0	1	4	0	0	0	0	0	0	0	0	0	0	0	0	3	2	1	1	3	0	2	3	1	0	2	0	0	0	19	12	0	0	0	1	0	0	0	0	0	1	5
926567: Thermanaerovibrio velox DSM 12556	1	1	5	6	2	205	3	0	3	0	3	1	8	5	2	1	4	0	20	0	1	0	23	5	2	2	0	11	1	1	0	1	0	0	0	0	16	9	0	2	2	1	0	2	0	2	0	1	1
635013: Thermincola potens JR	0	0	1	1	5	1	0	0	4	1	0	0	0	1	2	0	0	0	0	1	0	0	0	0	0	0	0	0	0	0	0	0	0	0	0	0	2	2	0	1	0	0	0	0	0	0	0	1	2
1754: Thermoanaerobacter	1	0	0	0	6	0	4	2	3	0	1	1	4	0	0	0	1	9	0	2	0	1	2	3	8	0	0	0	0	0	0	1	0	0	1	0	1	3	0	0	0	0	0	0	1	1	3	5	7
583358: Thermoanaerobacter mathranii subsp. mathranii str. A3	0	0	0	0	0	0	0	13	0	0	0	1	0	0	0	0	0	0	0	0	0	0	0	0	1	1	0	0	0	1	0	1	1	0	0	0	1	3	0	0	0	0	0	0	0	0	0	0	37
697303: Thermoanaerobacter wiegelii Rt8.B1	5	1	1	1	3	0	1	1	11	2	0	5	0	1	1	3	0	0	7	0	0	0	1	20	2	0	1	0	3	0	0	0	0	0	0	2	2	7	1	18	0	1	0	0	1	3	2	0	9
68295: Thermoanaerobacterales	2	0	5	2	22	0	167	79	24	25	37	113	74	0	5	192	0	14	501	8	56	0	207	13	17	0	21	35	0	17	5	1	7	14	5	1	78	69	0	1	13	0	71	50	17	10	0	4	125
580327: Thermoanaerobacterium thermosaccharolyticum DSM 571	1	5	0	5	2	0	4	0	1	0	0	0	0	0	1	0	0	1	0	0	0	0	0	1	0	0	0	1	0	0	0	0	1	0	0	0	1	2	0	0	0	0	0	12	1	0	0	1	0
858215: Thermoanaerobacterium xylanolyticum LX-11	0	0	0	0	0	1	0	0	1	0	1	1	0	1	0	1	0	6	0	0	1	0	0	0	0	13	0	0	0	0	3	0	0	0	0	0	4	1	0	0	0	0	0	1	0	0	0	0	2
717605: Thermobacillus composti KWC4	0	1	0	2	1	0	4	0	2	0	1	3	1	0	0	1	0	0	0	0	0	0	2	1	0	3	0	0	0	1	0	1	0	2	0	0	4	1	0	0	0	0	0	0	4	0	0	1	0
469371: Thermobispora bispora DSM 43833	1	0	1	2	11	0	8	6	0	9	7	7	1	7	2	1	0	2	0	1	0	0	8	3	0	4	1	0	0	0	0	0	4	0	0	1	7	2	0	0	0	1	0	4	0	0	0	7	2
667014: Thermodesulfatator indicus DSM 15286	0	0	0	0	1	0	0	0	1	0	0	0	0	0	0	0	0	0	0	0	0	0	0	0	0	0	0	0	0	0	0	0	0	0	0	0	1	2	0	0	0	0	0	0	0	0	0	0	0
747365: Thermodesulfobium narugense DSM 14796	1	1	1	0	16	0	3	1	6	0	0	2	0	0	0	2	0	1	0	0	0	0	0	0	0	0	1	0	0	0	0	0	0	0	1	0	0	2	0	0	0	0	0	0	0	0	0	0	0
289376: Thermodesulfovibrio yellowstonii DSM 11347	0	0	0	0	0	0	0	0	0	0	0	0	0	0	0	0	0	0	0	1	0	0	0	1	0	0	0	1	0	0	0	0	0	0	0	0	0	1	0	0	0	0	0	0	0	0	0	0	0
471852: Thermomonospora curvata DSM 43183	0	0	3	0	6	0	4	7	4	1	4	5	4	11	5	6	0	0	2	3	0	0	12	7	1	18	2	1	3	2	0	1	0	1	1	1	1	4	0	3	1	0	0	8	2	2	0	0	0
555079: Thermosediminibacter oceani DSM 16646	6	7	6	9	21	14	4	35	8	5	11	10	29	6	7	15	9	19	11	31	2	0	148	37	17	68	22	44	3	0	0	5	2	9	13	17	47	22	0	2	0	1	14	24	7	2	0	5	2
1462747: Thermosipho sp. 1063	0	0	0	0	2	0	3	0	1	0	1	0	1	0	0	0	0	0	0	0	0	0	0	0	1	0	0	0	0	0	0	0	0	0	0	0	2	3	0	0	0	0	0	1	0	0	1	0	8
1394889: Thermosynechococcus sp. NK55a	0	0	0	0	0	1	0	0	1	0	0	1	0	0	0	0	0	0	0	0	0	0	0	0	0	0	0	0	0	0	0	0	0	2	0	1	0	1	0	0	0	0	0	0	0	0	0	2	0
573729: Thermothelomyces thermophila ATCC 42464	1	14	7	3	6	15	8	11	7	18	13	12	5	4	2	16	7	9	6	28	5	3	14	4	16	121	11	22	5	3	1	2	0	3	2	3	5	6	2	2	5	5	10	14	5	14	11	55	49
2335: Thermotoga	9	8	8	48	42	0	12	8	32	9	71	50	3	8	13	20	4	8	0	13	0	1	13	8	10	14	25	10	2	4	0	0	0	0	7	0	13	2	0	0	4	0	11	4	6	0	4	44	0
243274: Thermotoga maritima MSB8	0	3	0	0	4	0	0	1	3	1	3	0	3	1	2	4	1	0	3	1	0	0	0	0	0	0	0	0	0	0	3	1	0	0	2	0	1	2	0	0	2	0	0	0	0	0	0	1	0
188709: Thermotogaceae	0	0	0	0	0	0	0	1	0	0	0	0	0	0	0	0	0	0	0	0	0	0	0	0	0	0	0	0	0	0	0	0	0	0	0	0	0	2	0	0	0	0	0	0	0	0	0	0	0
2419: Thermotogales	17	1	1	9	3	2	0	10	152	1	13	4	2	183	1	0	0	3	2	0	2	0	2	117	24	2	2	4	0	3	2	2	1	3	1	2	5	4	0	8	0	0	1	1	1	0	0	4	30
580340: Thermovirga lienii DSM 17291	11	34	89	1160	1018	26	7	1327	61	48	26	138	45	112	35	6	2683	1	24	45	16	30	103	18	12	667	20	175	78	2	3	3	13	4	14	2	168	42	29	89	10	52	11	59	13	78	13	10	107
270: Thermus	0	0	0	2	7	1	0	0	2	0	1	1	0	0	1	1	0	0	0	1	0	0	1	2	3	3	1	0	0	0	0	0	0	1	0	0	3	16	0	0	0	0	0	45	1	0	2	0	1
300852: Thermus thermophilus HB8	0	0	0	0	0	0	0	0	0	0	1	1	0	0	0	0	0	0	0	0	0	0	0	0	0	0	0	0	0	0	0	0	0	0	0	0	0	1	0	0	0	0	0	0	0	0	0	0	0
578455: Thielavia terrestris NRRL 8126	2	8	7	13	8	41	8	24	23	22	27	10	2	7	9	29	33	38	37	19	14	2	27	9	24	64	7	106	9	0	2	1	2	2	0	5	9	5	4	3	4	21	136	26	21	11	8	16	25
1255043: Thioalkalivibrio nitratireducens DSM 14787	0	0	4	0	10	0	0	0	10	0	0	3	0	0	0	0	0	0	1	0	0	0	2	0	1	0	0	0	0	0	0	0	0	0	0	0	0	1	0	0	0	0	0	0	1	0	0	0	0
713585: Thioalkalivibrio paradoxus ARh 1	0	0	0	0	0	0	0	1	1	0	1	0	0	0	0	0	0	0	2	0	0	0	0	0	0	1	0	0	0	0	0	0	0	0	0	0	0	1	0	0	0	1	0	2	0	0	0	0	0
396595: Thioalkalivibrio sp. K90mix	13	1	1	58	9	2	3	8	27	1	14	26	4	14	36	8	0	10	27	1	7	1	10	35	9	11	7	0	0	33	2	36	2	47	37	24	21	30	9	21	1	54	1	3	0	14	19	1	4
292415: Thiobacillus denitrificans ATCC 25259	2	5	4	1	1	1	8	6	6	5	14	4	4	3	3	41	1	1	24	5	0	0	6	1	4	1	7	4	2	12	2	0	2	2	1	2	12	8	0	0	1	70	1	5	3	0	0	15	1
765912: Thioflavicoccus mobilis 8321	1	1	9	12	2	1	1	4	7	1	1	11	1	7	3	2	1	2	2	1	2	1	1	1	2	27	2	5	1	1	2	0	0	0	0	0	14	12	0	9	0	0	21	0	3	0	1	1	1
426114: Thiomonas arsenitoxydans	2	4	10	74	30	19	1	134	0	70	148	306	525	327	140	199	0	37	958	14	9	16	8	229	26	0	45	56	33	64	5	57	6	13	7	77	308	52	0	0	0	0	163	2	66	20	6	93	51
75379: Thiomonas intermedia K12	0	1	0	1	1	0	0	1	3	2	0	0	0	2	0	3	0	0	30	1	0	0	21	0	0	2	0	0	0	0	0	0	2	0	0	0	14	4	0	0	0	0	2	3	0	0	1	0	0
40754: Thioploca ingrica	0	0	0	0	0	1	0	1	1	0	0	0	0	0	0	1	0	0	0	1	0	0	0	0	0	0	0	2	0	0	0	1	0	0	0	0	0	1	0	0	0	1	0	1	1	0	0	0	0
1737404: Tissierellia	0	1	0	2	4	0	2	0	1	0	2	1	4	4	0	0	0	1	0	14	0	0	1	0	0	18	1	0	0	0	0	0	0	0	0	0	1	3	1	0	0	0	5	4	0	1	0	3	0
595494: Tolumonas auensis DSM 9187	176	91	221	305	152	19	1200	1063	192	211	1707	2003	955	1445	606	692	6	177	1072	362	303	6	495	84	570	991	70	198	6	25	28	9	13	11	10	4	429	115	380	74	47	66	101	7	277	2	50	1456	24
4950: Torulaspora delbrueckii	0	0	0	0	2	0	0	0	1	1	18	26	0	0	0	0	6	2	0	0	3	0	19	6	0	3	14	145	79	0	1	0	0	0	0	0	0	5	1	0	29	86	1	1	1	5	26	1	119
157: Treponema	5	4	9	199	22	40	45	24	83	30	35	16	2	10	176	10	21	7	72	170	142	6	665	3	102	624	22	27	105	0	48	42	35	9	4	65	273	2	3	19	226	78	5	83	120	1	43	161	5
906968: Treponema brennaborense DSM 12168	0	8	4	11	5	18	4	1	59	2	4	1	0	5	13	0	95	0	6	1	0	0	17	2	21	85	0	11	3	0	0	1	4	4	0	3	34	3	1	84	32	4	0	2	24	0	0	13	2
158: Treponema denticola	3	0	1	59	15	26	14	7	29	19	4	0	0	1	118	0	2	1	12	26	45	0	132	0	64	50	3	9	21	5	21	4	6	0	0	9	228	1	3	1	119	34	2	72	70	1	3	47	11
160: Treponema pallidum	0	0	0	10	1	1	2	3	9	0	4	0	2	0	4	0	1	0	0	6	11	0	93	0	10	21	3	5	5	1	4	0	2	1	2	6	4	1	0	0	22	3	0	3	10	0	4	4	0
161: Treponema pallidum subsp. pallidum	3	0	5	8	9	0	2	3	9	7	6	4	0	0	3	2	0	5	13	6	2	0	15	1	13	3	1	1	0	12	0	0	1	0	1	0	5	2	2	2	6	0	0	12	1	1	0	3	12
545694: Treponema primitia ZAS-2	3	1	3	12	6	13	5	2	36	6	3	1	1	0	0	5	0	7	3	0	3	0	35	6	11	11	0	2	0	1	0	2	1	2	5	1	80	2	4	91	8	0	0	2	8	0	0	111	10
1539298: Treponema sp. OMZ 838	25	0	7	147	13	21	37	16	252	17	71	5	0	6	93	8	2	53	35	424	139	2	236	1	94	1694	20	63	44	0	1	19	18	8	9	34	14	7	14	1	253	21	0	3	134	0	106	170	10
869209: Treponema succinifaciens DSM 2489	1	0	41	32	7	12	2	10	56	0	1	5	2	79	11	0	21	0	5	13	0	0	8	8	1	186	3	38	0	1	0	0	1	1	0	1	7	7	1	18	3	0	0	6	85	0	0	0	32
218496: Tropheryma whipplei TW08/27	6	18	12	33	27	28	37	351	45	54	77	57	41	141	13	57	2	14	102	26	25	59	91	74	32	44	84	17	6	60	7	30	2	18	24	67	80	230	14	3	3	54	61	12	22	57	25	16	12
1661: Trueperella pyogenes	52	0	17	11	248	2	19	55	84	40	97	44	12	41	14	10	2	13	16	12	9	0	34	39	12	21	18	16	7	0	14	8	35	2	1	4	2	22	25	17	3	8	3	9	3	20	4	22	225
1435056: Trueperella pyogenes TP8	1	1	2	1	56	0	2	2	8	4	4	1	0	5	5	0	1	6	0	1	1	0	40	7	0	3	0	0	0	0	0	0	1	1	0	0	2	3	16	5	0	0	1	12	0	94	0	4	16
521096: Tsukamurella paurometabola DSM 20162	1	6	3	7	25	0	4	9	12	9	5	14	4	7	1	13	0	22	1	6	0	0	3	6	4	45	14	11	10	0	0	0	0	11	1	6	0	3	2	9	3	1	0	22	3	3	1	6	12
1712675: Turicibacter sp. H121	70	41	138	776	432	3	151	317	359	173	396	277	611	264	296	591	148	265	356	9	144	12	121	109	143	18	56	685	8	30	131	133	16	41	18	193	652	375	48	27	12	2	512	37	103	60	49	73	220
869212: Turneriella parva DSM 21527	0	1	0	1	0	1	2	0	0	1	2	4	0	0	0	0	1	0	0	0	0	0	0	0	0	2	1	0	0	0	0	0	0	0	2	0	4	1	0	0	1	1	0	0	1	0	1	0	2
38504: Ureaplasma parvum serovar 3	0	0	1	0	0	0	0	0	1	0	3	3	0	0	0	0	0	0	0	0	0	0	0	0	22	0	0	0	0	5	0	0	0	0	0	0	3	1	0	0	0	0	0	0	0	0	0	0	0
237631: Ustilago maydis 521	3	6	20	0	23	1	16	28	53	21	12	35	6	4	9	19	11	4	1	9	2	1	11	2	19	26	21	8	1	0	1	0	0	0	3	0	11	10	3	0	6	0	64	55	5	2	14	15	76
633807: Vagococcus penaei	5	12	7	9	81	0	28	35	42	18	45	23	22	5	9	8	0	11	2	2	1	0	2	2	3	9	7	1	1	0	0	2	2	3	1	7	8	6	3	1	4	0	1	12	11	2	2	1	31
519472: Vagococcus teuberi	1	6	9	15	41	0	4	63	22	11	34	35	3	12	23	18	1	13	19	1	6	2	7	2	15	26	10	4	2	6	2	2	1	10	1	3	21	4	0	0	1	0	0	19	2	1	6	11	25
34073: Variovorax paradoxus	3	0	0	0	0	3	0	2	0	2	1	0	0	2	3	0	0	2	0	0	0	0	0	0	0	0	0	0	0	0	0	1	0	0	1	0	2	3	2	1	0	1	1	0	1	0	1	0	0
543728: Variovorax paradoxus S110	1	1	0	0	1	0	1	2	0	7	3	0	4	0	0	13	0	2	0	15	1	0	12	0	0	1	0	3	4	3	0	0	0	5	2	0	3	1	0	1	0	0	4	2	0	0	0	1	0
29466: Veillonella parvula	3135	4795	6486	19723	38508	282	14873	9949	11638	7695	18774	30206	21897	7396	7135	10246	3551	3304	22301	864	3993	1541	7023	12887	17732	5006	4526	5512	1730	3013	1277	5287	2036	5139	1328	2133	26128	21328	4541	4838	1160	829	244	7542	1441	10662	2872	12033	31959
479436: Veillonella parvula DSM 2008	1531	2461	4643	3691	16112	91	10674	4632	5882	5915	10429	11697	6938	2873	3661	4491	2974	3533	1114	779	4082	1569	7084	7585	10335	3322	4009	2813	1339	4502	762	1492	2030	1207	1201	927	10119	7785	2683	3906	671	583	123	4391	997	5847	1719	10019	22810
31977: Veillonellaceae	5	52	11	29	47	2	16	65	11	17	16	27	22	594	4	8	386	20	21	3	9	3	266	819	1297	367	89	7	5	3620	39	10	84	319	89	218	497	1590	8	90	4	13	1	14	10	3023	435	11	56
48461: Verrucomicrobiales	0	0	2	1	0	0	0	1	0	0	1	0	0	0	0	1	0	1	0	0	0	0	0	0	0	0	0	0	0	0	0	0	0	0	0	0	0	1	0	0	0	1	0	0	0	0	0	0	0
240016: Verrucomicrobium spinosum DSM 4136 = JCM 18804	0	3	1	0	0	0	2	0	2	0	0	0	0	0	0	2	0	0	0	0	0	0	0	0	1	0	2	0	0	0	2	0	0	0	0	1	2	2	0	0	0	0	1	3	1	0	0	0	0
662: Vibrio	1	3	0	16	8	2	14	26	5	8	22	27	1	3	3	7	0	4	3	3	0	1	2	6	0	1	10	3	5	2	0	0	1	0	3	1	12	4	0	0	3	1	2	10	4	0	2	3	24
312309: Vibrio fischeri ES114	2	4	2	1	1	1	1	5	0	8	7	2	4	6	3	18	0	0	1	3	2	0	1	2	1	0	3	0	1	2	0	0	0	6	0	1	11	2	0	2	0	0	0	0	0	0	2	4	8
669: Vibrio harveyi	1	5	0	2	6	0	6	67	4	11	12	0	7	6	4	6	0	0	18	1	26	0	20	6	4	1	23	7	0	1	0	0	0	0	1	2	2	1	0	0	0	0	0	5	37	0	8	7	0
1429044: Vibrio parahaemolyticus UCM-V493	11	1	1	57	5	0	4	31	2	2	12	17	1	19	57	7	0	15	495	0	5	0	24	15	4	3	3	7	4	3	7	13	2	6	1	7	13	1	1	2	0	2	8	4	5	2	0	8	2
672: Vibrio vulnificus	0	4	0	0	0	0	0	2	3	1	1	1	0	0	0	2	0	0	0	0	1	0	1	1	3	1	5	0	0	1	0	0	0	0	0	0	4	1	0	0	0	0	3	2	0	0	0	1	0
641: Vibrionaceae	1	4	0	0	1	0	0	0	0	0	2	1	0	0	1	0	2	0	2	7	1	0	1	6	2	1	0	0	2	0	2	5	0	0	2	5	2	4	0	0	0	0	0	2	0	0	2	0	0
84406: Virgibacillus	0	1	0	0	0	0	4	0	0	0	0	3	0	4	0	0	0	0	0	0	0	0	0	0	0	0	0	0	0	0	0	0	0	1	0	0	0	1	0	0	0	0	0	0	0	0	0	0	0
1482: Virgibacillus halodenitrificans	1	6	2	8	17	0	0	39	2	8	33	20	2	8	5	8	0	6	6	3	7	0	3	12	13	12	4	7	0	1	0	4	0	1	1	0	5	1	0	0	0	1	14	9	2	1	0	14	2
403957: Virgibacillus sp. SK37	2	9	0	2	13	0	6	21	11	1	4	5	1	6	4	5	1	2	0	0	3	1	0	0	7	0	4	1	0	1	1	0	10	1	0	0	9	1	0	2	1	1	0	1	6	0	0	3	7
865938: Weeksella virosa DSM 16922	8	29	7	6	33	0	12	117	7	18	41	16	1	46	20	40	0	26	71	0	46	1	22	14	26	2	16	6	5	53	8	0	2	1	18	1	32	2	3	0	0	0	24	26	47	2	1	10	29
46255: Weissella	1	0	6	28	21	0	4	10	4	3	3	25	1	3	4	6	1	8	11	2	1	2	12	9	7	2	3	5	2	1	0	0	0	4	0	1	34	7	0	0	1	0	2	0	4	1	3	4	8
137591: Weissella cibaria	0	13	7	103	315	0	7	50	56	35	90	45	30	22	15	23	2	7	78	8	4	1	16	27	24	8	17	21	5	0	0	0	2	9	3	1	94	11	0	5	0	1	1	1	11	2	12	6	23
1631871: Weissella jogaejeotgali	0	2	9	0	13	1	14	6	13	1	6	8	3	8	0	4	0	0	0	1	0	0	2	6	0	0	3	0	1	1	2	0	6	1	0	2	4	2	1	0	1	0	0	3	0	1	14	130	2
1045854: Weissella koreensis KACC 15510	4	2	2	44	111	0	6	5	39	5	40	17	5	0	2	13	1	1	19	0	1	0	7	2	6	0	2	9	0	0	1	0	0	4	1	0	18	4	0	0	0	0	0	0	1	0	1	10	2
1579979: Wenzhouxiangella marina	0	0	1	0	0	0	1	3	2	1	1	1	2	1	0	3	0	0	3	1	0	0	2	0	10	0	1	0	0	0	2	0	0	0	2	1	0	1	0	0	0	1	12	0	2	0	0	0	1
1936080: Winogradskyella sp. J14-2	2	4	7	3	6	0	12	6	16	2	10	18	9	16	33	8	0	4	9	1	10	0	8	6	33	9	5	2	1	8	3	0	2	14	6	2	12	6	3	3	0	1	0	2	4	0	0	2	5
754409: Winogradskyella sp. PG-2	1	0	4	3	5	0	1	5	12	1	6	0	0	10	4	5	0	3	1	0	1	0	9	4	4	1	14	1	1	7	7	0	0	1	1	2	10	1	0	0	0	0	2	10	2	0	1	2	1
1548547: Woeseia oceani	1	2	0	2	4	0	0	0	0	2	0	2	0	0	0	0	0	0	0	0	0	0	0	0	0	0	0	0	0	0	1	0	0	0	0	0	0	1	0	0	0	0	0	1	0	0	0	0	0
953: Wolbachia	0	3	0	2	0	0	0	0	2	0	2	2	1	0	0	0	0	8	1	2	0	0	0	1	0	2	0	1	1	0	0	0	0	1	0	0	1	1	0	0	0	0	6	1	1	0	0	2	0
273121: Wolinella succinogenes DSM 1740	0	0	4	0	1	0	1	0	0	2	1	0	0	0	0	1	0	4	0	0	0	0	3	0	3	0	0	0	0	1	0	0	0	0	0	0	0	2	0	0	0	0	0	1	0	0	0	0	9
32033: Xanthomonadaceae	0	5	12	7	33	2	14	174	156	79	6	110	15	14	2	21	2	52	17	13	1	1	68	51	58	3	57	14	3	3	15	0	2	24	0	1	9	45	1	2	1	1	55	16	30	139	53	33	6
135614: Xanthomonadales	0	3	1	0	20	0	9	16	31	3	10	7	10	0	1	8	0	52	22	2	8	0	7	3	1	1	6	3	1	0	0	1	0	0	1	0	4	6	0	6	0	0	4	36	2	32	4	200	7
338: Xanthomonas	0	2	0	0	2	0	0	3	51	2	1	3	1	0	1	0	0	5	7	1	0	1	1	7	0	0	0	1	0	0	0	0	0	21	1	0	6	6	0	0	0	0	103	4	1	90	1	5	0
339: Xanthomonas campestris	0	0	0	0	1	0	0	0	50	0	0	1	0	0	0	0	0	1	0	0	2	0	0	0	0	0	0	0	0	0	0	0	0	2	0	0	0	1	0	0	0	0	0	2	2	9	0	1	3
359385: Xanthomonas campestris pv. raphani	0	0	0	0	0	0	0	0	0	0	0	0	0	2	0	0	0	1	0	0	0	0	1	0	0	0	0	0	0	0	0	0	0	0	0	0	0	1	0	0	0	0	0	0	0	0	0	0	0
611301: Xanthomonas citri subsp. citri	0	1	0	0	0	0	0	0	0	0	1	0	0	0	0	0	1	0	0	0	0	0	0	3	0	0	0	0	0	0	0	0	0	0	0	0	1	1	0	0	0	0	0	0	0	0	0	0	2
64187: Xanthomonas oryzae pv. oryzae	0	0	0	2	0	0	1	0	0	7	0	0	0	0	0	0	0	0	4	0	0	0	1	0	0	0	0	2	0	0	0	0	0	1	1	0	4	1	0	0	0	0	2	0	0	0	1	1	0
152263: Xanthomonas translucens pv. cerealis	0	1	0	0	0	0	1	2	0	0	0	0	0	0	0	4	1	0	0	0	0	0	0	0	0	0	0	0	1	2	0	3	1	0	0	2	0	1	0	0	0	0	0	0	0	0	0	0	3
40576: Xenorhabdus bovienii	0	0	0	1	0	0	4	0	0	14	1	3	1	1	0	0	0	1	3	1	0	0	1	3	3	0	0	4	0	0	6	0	0	1	2	3	2	1	0	0	0	0	0	0	0	0	0	0	2
351671: Xenorhabdus doucetiae	0	1	0	0	0	1	1	0	0	1	0	0	0	3	0	2	0	3	0	1	0	0	2	1	0	1	2	0	3	0	4	0	0	0	0	0	0	1	0	0	2	0	0	2	1	1	0	1	8
446471: Xylanimonas cellulosilytica DSM 15894	11	0	5	2	46	1	4	14	18	13	27	42	1	7	5	6	0	2	2	4	4	0	12	28	9	17	3	1	0	8	3	8	10	1	2	3	1	2	6	19	1	1	1	11	2	5	1	10	28
2371: Xylella fastidiosa	0	0	0	0	2	0	0	3	6	1	0	0	0	0	0	2	0	0	1	0	0	0	1	0	1	0	0	0	0	0	0	0	0	0	1	0	1	3	0	0	0	0	2	2	0	0	0	0	0
284591: Yarrowia lipolytica CLIB122	0	2	5	0	0	0	0	0	0	0	0	0	0	0	2	6	1	0	3	0	0	0	2	0	1	6	0	3	0	1	0	1	0	0	0	0	0	1	0	0	0	0	3	5	0	0	0	0	1
1470434: Zhongshania aliphaticivorans	0	3	0	0	3	1	0	7	4	2	11	2	1	0	0	1	0	2	0	0	12	0	8	3	4	1	4	0	3	5	1	0	0	0	4	0	0	7	0	0	2	0	3	11	2	1	2	5	4
559307: Zygosaccharomyces rouxii CBS 732	1	4	3	0	2	4	3	4	1	7	6	24	0	3	11	4	4	30	10	4	2	0	83	10	9	10	0	43	60	6	2	2	4	7	0	0	4	1	1	9	11	6	17	6	2	7	17	10	12
542: Zymomonas mobilis	0	0	2	0	0	7	0	9	1	2	3	5	0	3	0	1	0	3	0	0	0	1	0	0	5	1	1	2	0	1	0	0	1	0	0	1	1	1	0	0	0	0	0	3	6	0	3	2	5
555217: Zymomonas mobilis subsp. mobilis ATCC 10988	0	0	0	0	0	0	0	0	0	0	0	0	0	0	0	2	0	1	1	0	0	2	0	0	0	0	0	0	0	0	0	0	0	0	0	0	0	1	0	0	0	0	0	0	0	0	1	0	0
579138: Zymomonas mobilis subsp. pomaceae ATCC 29192	0	1	0	0	0	0	0	0	0	0	0	0	0	0	0	0	0	0	0	0	0	1	0	0	0	0	0	0	0	0	0	0	0	0	0	0	0	1	0	0	0	0	0	0	0	1	0	0	0
336722: Zymoseptoria tritici IPO323	1	23	10	7	7	26	139	87	13	38	30	5	3	7	3	70	12	17	8	43	7	4	55	7	14	21	11	79	5	1	2	0	5	2	1	1	3	30	5	0	3	3	45	13	12	8	18	38	6
439292: [Bacillus] selenitireducens MLS10	0	0	1	2	3	0	0	0	0	0	1	3	0	0	0	0	0	0	0	0	0	0	0	0	0	2	0	1	0	0	0	0	0	0	0	0	0	8	1	0	0	0	1	1	1	1	0	1	0
1128398: [Clostridium] acidurici 9a	0	4	0	26	22	6	0	1	5	1	2	5	0	1	0	1	1	4	5	0	0	0	6	2	2	6	1	1	0	0	1	0	0	1	1	1	2	2	1	0	0	2	0	1	2	1	3	1	1
394503: [Clostridium] cellulolyticum H10	1	0	0	7	49	1	12	0	8	6	10	1	2	1	0	3	0	1	0	2	1	1	0	2	1	0	5	0	0	0	0	0	0	1	0	0	3	4	10	5	1	0	0	2	0	0	0	2	9
29343: [Clostridium] cellulosi	2	0	0	10	20	0	10	0	8	10	4	1	0	0	2	0	0	7	0	0	0	0	2	4	3	0	2	2	0	0	0	1	6	2	0	0	5	15	0	0	1	0	0	3	4	0	0	4	16
720554: [Clostridium] clariflavum DSM 19732	15	9	5	157	467	0	95	28	97	110	49	142	101	49	44	103	5	50	21	5	26	7	37	77	19	4	84	78	20	21	48	23	9	17	11	30	145	56	11	20	4	0	71	51	11	2	7	30	62
991789: [Clostridium] propionicum DSM 1682	4	14	6	18	31	2	32	15	13	48	23	37	12	12	17	14	4	8	4	0	16	2	14	32	16	13	57	8	12	3	4	3	27	13	0	14	25	78	4	3	6	0	1	6	7	0	7	14	58
610130: [Clostridium] saccharolyticum WM1	28	28	54	205	451	1	233	122	72	317	849	492	770	143	536	86	0	948	345	41	705	81	351	372	1217	43	265	65	80	39	97	70	254	50	164	31	316	1934	36	70	12	1	4	323	35	118	14	133	660
1121335: [Clostridium] stercorarium subsp. stercorarium DSM 8532	6	0	1	1	5	0	7	3	8	10	11	19	5	0	8	2	0	5	7	2	3	1	1	13	13	4	2	4	6	4	3	0	4	1	4	2	4	14	0	0	0	0	2	0	1	1	2	9	11
1121336: [Clostridium] stercorarium subsp. thermolacticum DSM 2910	0	0	0	3	5	0	1	0	0	0	1	0	1	5	12	0	0	1	1	1	0	0	5	0	0	0	0	0	0	0	1	0	0	0	1	0	0	1	0	2	0	1	0	1	1	0	1	0	6
515619: [Eubacterium rectale] ATCC 33656	120	377	135	61	1027	9	289	316	349	674	559	894	96	254	245	138	1	407	307	39	127	31	303	307	947	64	364	276	22	6	26	40	56	20	53	69	180	816	58	30	187	6	1	574	80	119	11	80	971
633697: [Eubacterium] cellulosolvens 6	25	23	31	29	54	4	92	37	30	91	81	82	62	15	33	80	2	12	48	6	39	14	69	83	172	17	39	123	31	41	20	8	32	16	12	29	100	192	30	16	2	1	2	19	2	21	10	376	1349
515620: [Eubacterium] eligens ATCC 27750	83	33	17	72	3132	1	114	129	97	383	707	182	42	178	99	83	2	65	18	4	25	8	38	162	147	9	177	41	5	5	15	2	15	66	48	2	43	432	6	32	18	0	1	633	22	49	0	110	630
730: [Haemophilus] ducreyi	3	10	5	2	17	0	2	85	26	7	16	47	34	36	20	6	0	5	31	52	5	2	4	11	15	6	51	18	1	3	3	1	3	5	4	15	123	7	0	0	11	0	3	23	66	2	5	9	7
738: [Haemophilus] parasuis	55	56	36	57	81	1	386	371	37	218	192	752	165	211	117	334	0	41	536	382	52	21	169	96	64	30	104	124	4	6	6	7	9	0	24	35	315	63	0	0	34	0	3	247	157	53	23	137	343
413882: [Polyangium] brachysporum	0	4	2	1	10	18	7	17	8	11	44	51	22	0	4	74	0	6	25	5	4	0	90	12	2	0	14	4	4	2	2	0	1	1	3	0	30	16	0	0	0	0	9	40	5	0	0	0	3
744985: alpha proteobacterium HIMB59	1	0	1	1	0	0	1	0	3	0	4	1	1	0	1	0	1	1	0	3	0	2	1	2	4	0	0	3	1	5	0	0	0	2	1	0	0	7	0	1	1	0	2	11	0	1	0	2	3
1307839: bacterium L21-Spi-D4	4	1	21	24	22	0	7	8	34	16	22	53	1	7	16	32	19	10	5	0	7	5	6	6	14	52	444	1	6	32	2	1	1	0	1	0	16	4	4	10	1	1	0	12	10	1	6	10	29
543913: beta proteobacterium CB	0	0	0	0	4	0	2	0	3	0	0	0	4	0	0	25	0	0	2	0	5	0	0	0	0	0	0	0	0	0	0	0	0	0	0	0	2	1	0	0	0	0	3	2	0	1	0	0	0
131567: cellular organisms	17	107	57	70	173	94	210	229	102	186	196	462	63	81	55	82	245	343	65	502	127	24	551	212	168	211	122	1604	347	35	35	60	93	82	20	36	103	256	42	113	1619	1497	50	172	62	1992	610	493	1478
68525: delta/epsilon subdivisions	5	0	0	0	0	1	0	13	0	3	2	5	1	0	2	15	1	1	14	0	7	0	22	0	1	5	2	0	1	4	0	0	15	1	4	4	1	1	0	1	12	0	0	0	2	0	3	0	3
716546: leotiomyceta	0	7	10	10	19	25	30	17	111	30	19	15	23	18	2	54	34	23	13	9	12	8	28	10	26	39	7	13	15	13	10	4	2	4	5	3	14	39	6	7	1	6	134	11	5	40	8	32	17
111527: pseudomallei group	0	0	1	1	19	1	1	2	0	0	4	0	0	3	0	3	0	0	12	2	0	0	0	0	1	0	2	3	0	0	0	0	2	0	0	0	2	5	1	0	0	1	2	0	0	0	0	1	0
716545: saccharomyceta	30	53	36	37	40	43	31	198	63	126	177	145	42	25	33	32	41	65	31	79	121	40	301	45	102	73	25	44	27	14	15	12	48	39	22	4	51	96	6	15	9	14	85	143	57	216	23	69	34
114277: spotted fever group	0	0	1	0	2	0	0	1	0	0	0	1	1	0	0	0	0	0	3	0	0	0	2	2	2	2	0	0	0	1	0	0	0	0	0	0	4	2	0	1	0	0	13	0	1	0	0	0	0
taxonid: taxon	read-count	read-count	read-count	read-count	read-count	read-count	read-count	read-count	read-count	read-count	read-count	read-count	read-count	read-count	read-count	read-count	read-count	read-count	read-count	read-count	read-count	read-count	read-count	read-count	read-count	read-count	read-count	read-count	read-count	read-count	read-count	read-count	read-count	read-count	read-count	read-count	read-count	read-count	read-count	read-count	read-count	read-count	read-count	read-count	read-count	read-count	read-count	read-count	read-count
119065: unclassified Burkholderiales	2	4	146	35	4	6	46	2	1	5	4	220	2	2	2	1087	0	27	3847	4	0	2	1702	0	3	11	76	1	0	47	33	3	9	1	2	1	3331	304	2	1	2	28	6	153	2	0	9	9	4
118884: unclassified Gammaproteobacteria	0	0	0	0	0	0	2	0	0	0	0	0	0	0	0	0	0	1	0	0	0	0	0	0	0	0	1	0	0	0	0	0	0	0	0	0	0	2	0	0	0	0	0	0	0	1	0	1	0
471821: uncultured Termite group 1 bacterium phylotype Rs-D17	0	0	0	0	0	0	0	0	0	0	0	0	0	0	0	0	0	0	0	0	0	0	1	0	0	0	0	0	0	0	0	0	0	0	0	0	0	1	0	0	0	0	0	0	0	0	0	0	0
1972846:	0	0	0	0	2	0	0	1	1	0	1	6	4	0	0	2	1	0	0	0	0	0	3	0	0	0	2	0	0	1	0	0	0	0	0	1	1	0	0	0	0	0	0	3	0	1	0	2	3
551115: 'Nostoc azollae' 0708	0	0	2	1	6	7	19	39	0	7	2	19	2	12	0	3	2	16	0	2	15	0	56	4	6	13	0	53	0	1	0	1	10	2	2	0	3	0	0	0	0	0	0	2	0	48	31	0	28
434: Acetobacter	0	1	0	1	12	0	0	0	0	2	4	1	0	1	0	0	0	1	0	1	0	0	0	1	0	1	0	0	0	0	1	0	0	0	0	0	0	0	0	0	0	1	0	0	0	0	0	0	2
1167634: Achromobacter xylosoxidans NH44784-1996	0	3	0	0	0	0	0	0	0	0	0	4	2	0	0	1	0	0	1	0	0	0	0	0	0	0	0	0	0	1	0	0	0	0	0	0	0	0	0	0	0	0	0	0	0	0	0	0	0
1171373: Acidipropionibacterium acidipropionici ATCC 4875	3	0	4	2	4	0	3	4	4	6	2	5	1	4	2	0	0	3	1	3	0	0	2	8	1	3	1	1	0	0	0	1	3	0	1	0	0	0	0	1	1	1	0	2	0	1	0	1	13
204434: Acidobacteriaceae	0	0	1	1	2	0	2	1	4	2	10	2	0	0	0	0	0	1	2	0	0	0	1	0	4	7	1	0	0	0	0	0	1	0	0	0	0	0	0	0	0	0	0	10	1	0	0	0	9
240015: Acidobacterium capsulatum ATCC 51196	0	1	0	0	4	0	0	0	0	0	0	2	0	0	0	0	0	1	0	0	0	0	0	0	0	0	0	0	0	0	0	0	0	0	0	0	0	0	0	0	0	2	0	0	0	0	0	0	0
351607: Acidothermus cellulolyticus 11B	0	2	8	0	1	0	0	6	1	0	5	3	2	3	0	0	6	2	0	0	0	0	15	3	0	4	0	0	0	0	0	0	0	0	0	0	2	0	0	0	0	0	0	0	0	0	0	1	1
643561: Acidovorax avenae subsp. avenae ATCC 19860	0	0	0	0	2	0	2	4	0	0	1	2	0	6	0	2	0	9	0	2	0	0	0	0	0	0	0	0	0	0	0	0	0	2	1	0	2	0	0	0	0	0	0	2	0	0	0	2	0
1324350: Acinetobacter equi	0	0	1	0	0	0	2	0	2	0	1	2	0	0	0	0	1	2	0	2	0	0	0	0	0	1	0	1	0	0	4	0	0	1	0	2	0	0	0	0	0	0	0	0	0	0	0	1	1
108981: Acinetobacter schindleri	0	1	0	1	0	0	0	3	0	0	0	1	0	1	0	4	0	1	0	4	0	0	0	0	2	2	0	0	0	1	0	0	0	0	2	0	0	0	0	0	0	0	1	0	2	0	0	1	0
62977: Acinetobacter sp. ADP1	0	1	0	0	0	0	1	0	0	3	1	1	0	2	0	1	1	43	4	41	0	0	0	0	0	5	0	5	0	0	0	0	0	1	3	0	2	0	0	0	0	0	3	0	0	0	1	0	1
340345: Actinoalloteichus hymeniacidonis	0	1	0	0	0	0	1	1	0	1	0	4	0	5	0	4	0	0	0	0	0	0	1	1	0	1	0	0	0	0	0	0	1	0	0	0	0	0	0	0	0	0	0	0	0	0	1	1	4
713: Actinobacillus	0	1	0	1	2	0	15	47	8	1	4	26	2	5	3	8	0	0	14	67	4	1	2	11	8	2	12	19	0	0	2	0	1	0	5	5	32	0	0	0	10	0	0	9	28	0	0	2	3
202947: Actinobacillus equuli subsp. equuli	0	1	5	0	1	0	1	7	4	0	1	2	3	0	1	0	0	2	2	13	1	0	0	3	3	0	4	0	0	1	0	0	3	0	0	6	19	0	0	0	3	0	0	0	22	0	0	1	1
715: Actinobacillus pleuropneumoniae	0	11	3	0	6	0	10	392	182	2	6	106	8	6	116	6	0	1	8	108	3	173	1	3	268	1	92	3	0	15	0	0	1	0	154	8	3946	0	0	0	4	0	0	43	857	0	2	12	1
434271: Actinobacillus pleuropneumoniae serovar 3 str. JL03	0	1	0	1	1	0	0	4	0	1	2	3	2	1	9	0	0	1	0	1	0	0	2	0	2	0	2	1	0	1	0	0	0	0	0	0	3	0	0	0	11	0	0	42	1	0	0	8	0
416269: Actinobacillus pleuropneumoniae serovar 5b str. L20	0	1	0	0	3	0	2	25	2	0	6	23	0	0	3	0	0	2	10	13	0	0	9	1	1	2	2	0	0	0	0	1	0	0	2	7	10	0	0	0	5	0	0	3	2	0	2	1	0
537457: Actinobacillus pleuropneumoniae serovar 7 str. AP76	0	0	2	0	3	0	1	341	3	0	2	27	1	2	4	1	0	13	141	7	1	3	2	0	10	0	10	0	0	1	0	0	16	0	7	1	148	0	0	0	3	0	0	2	51	0	0	5	2
754345: Actinobacillus pleuropneumoniae serovar 8	1	1	0	0	2	0	1	8	2	1	0	18	17	13	2	4	0	0	1	4	0	0	2	0	3	0	5	2	0	0	0	0	1	0	1	0	104	0	0	0	2	0	0	1	3	0	0	0	0
716: Actinobacillus suis	0	0	0	0	0	0	1	12	0	1	1	4	1	0	1	1	0	0	0	13	0	0	2	0	0	0	4	0	0	0	0	0	0	0	0	1	11	0	0	0	3	0	0	2	1	0	0	0	1
743972: Actinobacillus suis ATCC 33415	3	1	0	0	0	0	4	19	10	7	0	9	4	17	1	1	0	2	3	25	2	0	5	3	0	0	11	1	1	0	7	0	0	1	0	4	17	0	0	0	2	0	4	8	5	1	1	3	5
696748: Actinobacillus suis H91-0380	0	2	0	0	4	0	3	18	9	3	0	20	2	0	0	0	0	0	4	43	1	0	1	0	2	0	10	0	4	3	0	0	0	1	8	3	18	0	0	0	15	0	0	4	11	0	7	0	1
1650658: Actinobacteria bacterium IMCC26256	0	2	0	0	1	0	2	1	2	1	4	2	0	1	0	0	0	0	0	0	0	0	1	1	0	1	0	0	0	0	1	0	1	1	0	0	1	0	0	0	1	0	0	1	0	1	1	1	2
512565: Actinoplanes missouriensis 431	0	0	0	0	2	0	4	2	0	0	2	3	1	1	0	0	0	3	1	3	1	0	2	0	1	1	1	0	0	0	0	0	0	0	0	0	1	0	0	0	0	0	1	1	1	0	0	1	3
134676: Actinoplanes sp. SE50/110	4	0	1	2	5	0	1	4	0	4	4	2	0	0	1	2	1	1	1	1	0	0	0	2	0	2	0	1	0	0	1	0	1	0	0	0	1	0	1	11	0	0	0	1	0	0	0	3	7
1036672: Advenella kashmirensis WT001	0	0	0	0	0	0	1	0	2	0	0	1	0	1	0	1	0	3	1	0	0	0	1	0	2	0	1	0	0	0	0	0	0	0	1	1	3	0	0	0	0	0	0	2	0	0	0	0	0
87541: Aerococcus christensenii	1	7	2	1	98	1	77	12	8	5	10	9	4	6	7	66	0	1	2	0	1	0	6	3	8	14	1	8	3	0	2	11	4	2	0	3	17	0	1	1	0	0	3	3	2	0	8	10	10
1377: Aerococcus viridans	3	21	1	8	13	0	4	22	7	3	18	17	2	0	3	37	1	0	3	0	0	0	1	0	3	0	8	1	0	0	0	0	1	0	0	0	15	0	0	0	4	0	2	13	22	0	4	40	4
644: Aeromonas hydrophila	0	0	0	0	1	0	0	1	3	1	0	2	0	0	0	6	0	3	0	1	0	0	5	0	0	1	0	0	0	0	0	0	0	0	0	0	3	0	2	0	0	0	0	2	0	8	0	2	1
1416915: Aeromonas hydrophila NJ-35	0	0	0	0	0	0	0	0	0	0	0	3	0	0	0	3	0	0	0	0	0	0	0	0	0	0	0	0	0	0	0	0	0	0	0	0	0	0	0	0	0	0	0	0	0	0	0	0	0
380703: Aeromonas hydrophila subsp. hydrophila ATCC 7966	0	0	0	0	0	0	0	0	0	1	1	2	0	0	0	0	0	0	0	0	0	0	0	0	0	0	0	0	0	0	0	0	0	1	0	0	0	0	0	0	0	0	0	0	0	0	0	0	1
1842536: Agrobacterium sp. RAC06	0	0	0	0	0	0	0	0	0	0	0	1	0	1	0	1	0	1	0	0	0	0	0	0	0	0	0	0	0	0	0	0	0	0	0	0	0	0	0	0	0	0	0	0	0	0	0	0	0
[truncated: 3,294 more rows]
[truncated: 35 more columns]
