# Supplementary material for: The oral microbiome of early stage Parkinson’s disease and its relationship with functional measures of motor and non-motor function
Source: PLoS One. 2019 Jun 27;14(6):e0218252. doi: 10.1371/journal.pone.0218252 (PMC6597068; doi:10.1371/journal.pone.0218252)
Supplement: S4 Table — RNAs identified according to KO ID. (XLSX) [file pone.0218252.s007.xlsx]

## Sheet: Sheet1
KEGG		Average Raw Alignment Reads				Log2 Normalized Reads		Log2 Diff	Welch's T
Orthology ID	Gene Titles	% of Total	Overall	Control	PD	Control	PD	PD vs Ctrl	P value
K01977	16SrRNA, rrs; 16S ribosomal RNA	24.9736	13028	16052.2	10759.9	17.6709	17.0999	-0.571087	0.0771128
K01980	23SrRNA, rrl; 23S ribosomal RNA	14.2428	7430.06	8601.53	6551.46	17.3701	17.0168	-0.353293	0.169799
K01985	5SrRNA, rrf; 5S ribosomal RNA	13.209	6890.79	5663.08	7811.56	17.119	17.6102	0.491106	0.104711
K14225	tRNA-Gly; tRNA Gly	12.5911	6568.44	5804.75	7141.21	16.5189	16.9987	0.479867	0.241332
K14224	tRNA-Glu; tRNA Glu	7.94139	4142.81	3905.44	4320.83	16.5805	16.4958	-0.0847448	0.799002
K14235	tRNA-Trp; tRNA Trp	7.08319	3695.11	2915.28	4279.98	16.1298	16.2982	0.168434	0.626646
K14234	tRNA-Thr; tRNA Thr	5.28802	2758.62	1350.72	3814.54	15.1681	14.8393	-0.328822	0.770907
K01591	pyrF; orotidine-5'-phosphate decarboxylase [EC:4.1.1.23]	3.18114	1659.51	1393.61	1858.94	15.0125	15.2465	0.233982	0.584336
K15083	RAD16; DNA repair protein RAD16	2.17462	1134.44	1520.89	844.604	14.9688	14.62	-0.348802	0.55003
K14219	tRNA-Arg; tRNA Arg	1.56119	814.429	349.556	1163.08	13.4757	14.5527	1.07708	0.215716
K14230	tRNA-Met; tRNA Met	1.08098	563.917	485.444	622.771	14.0263	13.8918	-0.134492	0.815663
K14221	tRNA-Asp; tRNA Asp	0.470898	245.655	377.944	146.438	13.6022	11.5898	-2.0124	0.344447
K14226	tRNA-His; tRNA His	0.468411	244.357	182.056	291.083	11.8259	12.1283	0.30244	0.651905
K01982	LSUrRNA; large subunit ribosomal RNA	0.462979	241.524	190.167	280.042	12.9708	13.2985	0.327657	0.659906
K14232	tRNA-Pro; tRNA Pro	0.445385	232.345	217.528	243.458	12.562	11.92	-0.642006	0.333027
K14228	tRNA-Leu; tRNA Leu	0.433701	226.25	252.278	206.729	12.1921	12.3318	0.139646	0.775442
K01979	SSUrRNA; small subunit ribosomal RNA	0.407686	212.679	117.778	283.854	11.8665	12.7164	0.849944	0.0602894
K14229	tRNA-Lys; tRNA Lys	0.300088	156.548	148.306	162.729	11.5295	12.5378	1.00836	0.145933
K14233	tRNA-Ser; tRNA Ser	0.265538	138.524	65.0556	193.625	10.6901	11.6993	1.00912	0.14014
K14218	tRNA-Ala; tRNA Ala	0.166087	86.6429	106.75	71.5625	11.229	10.4825	-0.746493	0.366383
K14227	tRNA-Ile; tRNA Ile	0.132609	69.1786	52.3333	81.8125	10.4552	10.6492	0.193982	0.703448
K14220	tRNA-Asn; tRNA Asn	0.132472	69.1071	65	72.1875	10.9522	11.0365	0.0842784	0.892234
K14237	tRNA-Val; tRNA Val	0.129871	67.75	65.7778	69.2292	10.6093	10.2936	-0.315634	0.485001
K02358	tuf, TUFM; elongation factor Tu	0.127269	66.3929	73.9167	60.75	10.6591	10.5715	-0.0875045	0.684534
K14231	tRNA-Phe; tRNA Phe	0.102326	53.381	70.8611	40.2708	10.6187	10.0211	-0.597639	0.196795
K14223	tRNA-Gln; tRNA Gln	0.100798	52.5833	55.4167	50.4583	10.5166	9.92578	-0.590784	0.411642
K01986	LSU5.8S; large subunit ribosomal RNA, 5.8S	0.0953891	49.7619	44.8611	53.4375	10.1438	10.7739	0.630019	0.204402
K14236	tRNA-Tyr; tRNA Tyr	0.0563206	29.381	27.1111	31.0833	9.82663	9.38834	-0.438286	0.555945
K02886	RP-L2, MRPL2, rplB; large subunit ribosomal protein L2	0.0447279	23.3333	23.6389	23.1042	9.09184	9.18913	0.097292	0.751818
K00520	merA; mercuric reductase [EC:1.16.1.1]	0.0444312	23.1786	20.7222	25.0208	9.27203	9.58859	0.316563	0.499788
K02986	RP-S4, rpsD; small subunit ribosomal protein S4	0.0399584	20.8452	22.1389	19.875	9.00105	8.99098	-0.0100708	0.971767
K00134	GAPDH, gapA; glyceraldehyde 3-phosphate dehydrogenase [EC:1.2.1.12]	0.0370146	19.3095	18.4444	19.9583	8.76636	9.19567	0.429311	0.14182
K02355	fusA, GFM, EFG; elongation factor G	0.0344359	17.9643	17.4722	18.3333	8.48763	8.85513	0.367499	0.137786
K03046	rpoC; DNA-directed RNA polymerase subunit beta' [EC:2.7.7.6]	0.0319941	16.6905	11.6111	20.5	8.03251	8.86184	0.829327	0.20123
K02945	RP-S1, rpsA; small subunit ribosomal protein S1	0.0305565	15.9405	16.4444	15.5625	8.52121	8.67356	0.152348	0.556229
K00656	E2.3.1.54, pflD; formate C-acetyltransferase [EC:2.3.1.54]	0.0280006	14.6071	15.3611	14.0417	8.40895	8.7289	0.319949	0.322057
K01689	ENO, eno; enolase [EC:4.2.1.11]	0.0276126	14.4048	13.1111	15.375	8.15275	8.7341	0.581352	0.0169795
K03497	parB, spo0J; ParB family transcriptional regulator, chromosome partitioning protein	0.0269965	14.0833	15.0278	13.375	8.45576	8.05374	-0.402023	0.412745
K04043	dnaK, HSPA9; molecular chaperone DnaK	0.0263803	13.7619	14.0833	13.5208	8.38394	8.60415	0.220209	0.427424
K03216	trmL, cspR; tRNA (cytidine/uridine-2'-O-)-methyltransferase [EC:2.1.1.207]	0.0263803	13.7619	12.6667	14.5833	8.38171	7.9448	-0.436915	0.646385
