# Supplementary material for: The oral microbiome of early stage Parkinson’s disease and its relationship with functional measures of motor and non-motor function
Source: PLoS One. 2019 Jun 27;14(6):e0218252. doi: 10.1371/journal.pone.0218252 (PMC6597068; doi:10.1371/journal.pone.0218252)
Supplement: S5 Table — (XLSX) [file pone.0218252.s008.xlsx]

## Sheet: Sheet1
KEGG		Average Raw Alignment Reads				Log2 Normalized Reads		Log2 Diff	Welch's T
Orthology ID	Gene Titles	% of Total	Overall	Control	PD	Control	PD	PD vs Ctrl	P value
K03799	htpX; heat shock protein HtpX [EC:3.4.24.-]	0.00232768	1.21429	0.75	1.5625	4.02605	5.60698	1.58093	0.00491907
K00700	GBE1, glgB; 1,4-alpha-glucan branching enzyme [EC:2.4.1.18]	0.00305793	1.59524	1.05556	2	4.35567	6.20645	1.85078	0.0080611
K09815	znuA; zinc transport system substrate-binding protein	0.00273844	1.42857	1.11111	1.66667	4.11249	6.15392	2.04143	0.0117249
K03650	mnmE, trmE, MSS1; tRNA modification GTPase [EC:3.6.-.-]	0.00228204	1.19048	0.805556	1.47917	3.89191	5.38549	1.49358	0.013269
K02913	RP-L33, MRPL33, rpmG; large subunit ribosomal protein L33	0.00725687	3.78571	2.91667	4.4375	5.99752	7.06613	1.06861	0.0135956
K00705	malQ; 4-alpha-glucanotransferase [EC:2.4.1.25]	0.00470099	2.45238	2	2.79167	5.64408	6.66416	1.02007	0.0138961
K01873	VARS, valS; valyl-tRNA synthetase [EC:6.1.1.9]	0.00848917	4.42857	3.44444	5.16667	6.1946	7.10586	0.911259	0.0154878
K01689	ENO, eno; enolase [EC:4.2.1.11]	0.0276126	14.4048	13.1111	15.375	8.15275	8.7341	0.581352	0.0169795
K09812	ftsE; cell division transport system ATP-binding protein	0.00314921	1.64286	1.30556	1.89583	4.51098	5.7465	1.23552	0.0174929
K21636	nrdD; ribonucleoside-triphosphate reductase (formate) [EC:1.1.98.6]	0.00248742	1.29762	0.861111	1.625	4.09657	6.21766	2.12109	0.0195152
K00615	E2.2.1.1, tktA, tktB; transketolase [EC:2.2.1.1]	0.00415331	2.16667	2.05556	2.25	5.21586	6.36569	1.14983	0.0201335
K00951	relA; GTP pyrophosphokinase [EC:2.7.6.5]	0.00262434	1.36905	1.02778	1.625	4.22374	5.6921	1.46836	0.0217054
K00088	IMPDH, guaB; IMP dehydrogenase [EC:1.1.1.205]	0.00949327	4.95238	3.36111	6.14583	6.37315	7.54166	1.1685	0.0232951
K02837	prfC; peptide chain release factor 3	0.00273844	1.42857	2.22222	0.833333	5.51048	4.00986	-1.50062	0.0240756
K03781	katE, CAT, catB, srpA; catalase [EC:1.11.1.6]	0.00219075	1.14286	1.66667	0.75	5.05901	3.13752	-1.92149	0.0271404
K15580	oppA, mppA; oligopeptide transport system substrate-binding protein	0.00349151	1.82143	1.72222	1.89583	5.1736	6.28339	1.10979	0.0293923
K01834	PGAM, gpmA; 2,3-bisphosphoglycerate-dependent phosphoglycerate mutase [EC:5.4.2.11]	0.010543	5.5	3.55556	6.95833	6.27034	7.78528	1.51494	0.0350735
K00689	E2.4.1.5; dextransucrase [EC:2.4.1.5]	0.00209947	1.09524	0.833333	1.29167	4.01126	5.57684	1.56558	0.0354184
K03625	nusB; transcription antitermination protein NusB	0.00189409	0.988095	0.944444	1.02083	4.2646	5.61384	1.34924	0.0358908
K00600	glyA, SHMT; glycine hydroxymethyltransferase [EC:2.1.2.1]	0.00241896	1.2619	1.05556	1.41667	4.49516	5.54418	1.04903	0.0386345
K01887	RARS, argS; arginyl-tRNA synthetase [EC:6.1.1.19]	0.00248742	1.29762	1.19444	1.375	4.52289	5.50648	0.983588	0.0395359
K11065	tpx; thiol peroxidase, atypical 2-Cys peroxiredoxin [EC:1.11.1.15]	0.00422177	2.20238	1.66667	2.60417	4.75005	6.37595	1.6259	0.0425321
K03722	dinG; ATP-dependent DNA helicase DinG [EC:3.6.4.12]	0.0130989	6.83333	10.0833	4.39583	8.08385	6.25072	-1.83313	0.0431655
K01867	WARS, trpS; tryptophanyl-tRNA synthetase [EC:6.1.1.2]	0.00940199	4.90476	3.61111	5.875	6.35598	7.78248	1.4265	0.0485656
K02965	RP-S19, rpsS; small subunit ribosomal protein S19	0.0109766	5.72619	5.33333	6.02083	6.81713	7.84849	1.03136	0.0525781
K02881	RP-L18, MRPL18, rplR; large subunit ribosomal protein L18	0.0158601	8.27381	7.58333	8.79167	7.32628	7.96313	0.636848	0.0528172
K02519	infB, MTIF2; translation initiation factor IF-2	0.00490638	2.55952	2.41667	2.66667	5.55266	6.86996	1.3173	0.0530984
K02111	ATPF1A, atpA; F-type H+/Na+-transporting ATPase subunit alpha [EC:7.1.2.2 7.2.2.1]	0.00444997	2.32143	2.05556	2.52083	5.38004	6.39502	1.01498	0.0532838
K04086	clpL; ATP-dependent Clp protease ATP-binding subunit ClpL	0.00563663	2.94048	3.13889	2.79167	5.73348	6.94519	1.21171	0.0541193
K15583	oppD; oligopeptide transport system ATP-binding protein	0.00127794	0.666667	0.277778	0.958333	2.62697	4.60885	1.98188	0.0555226
K01979	SSUrRNA; small subunit ribosomal RNA	0.407686	212.679	117.778	283.854	11.8665	12.7164	0.849944	0.0602894
K18988	ampH; serine-type D-Ala-D-Ala carboxypeptidase/endopeptidase [EC:3.4.16.4 3.4.21.-]	0.00408484	2.13095	1	2.97917	4.77607	6.18674	1.41067	0.0618629
K02470	gyrB; DNA gyrase subunit B [EC:5.6.2.2]	0.00513458	2.67857	2.36111	2.91667	5.73088	6.47687	0.745986	0.0637592
K03521	fixA, etfB; electron transfer flavoprotein beta subunit	0.00141486	0.738095	0.388889	1	2.8521	4.19942	1.34732	0.0666127
K02961	RP-S17, MRPS17, rpsQ; small subunit ribosomal protein S17	0.0141258	7.36905	6.77778	7.8125	7.30929	8.02956	0.720267	0.0718533
K01810	GPI, pgi; glucose-6-phosphate isomerase [EC:5.3.1.9]	0.00552253	2.88095	2.55556	3.125	5.99172	6.67364	0.68192	0.0734744
K02963	RP-S18, MRPS18, rpsR; small subunit ribosomal protein S18	0.0158373	8.2619	8.19444	8.3125	7.35329	8.03597	0.682681	0.0736195
K00873	PK, pyk; pyruvate kinase [EC:2.7.1.40]	0.0128022	6.67857	7.11111	6.35417	7.19108	7.95864	0.767558	0.0760285
K01977	16SrRNA, rrs; 16S ribosomal RNA	24.9736	13028	16052.2	10759.9	17.6709	17.0999	-0.571087	0.0771128
K04075	tilS, mesJ; tRNA(Ile)-lysidine synthase [EC:6.3.4.19]	0.00180281	0.940476	1.47222	0.541667	4.76611	3.52153	-1.24458	0.0784041
K01981	LSU5S; large subunit ribosomal RNA, 5S	0.0028069	1.46429	1.02778	1.79167	4.69383	5.92284	1.22901	0.0787906
K01256	pepN; aminopeptidase N [EC:3.4.11.2]	0.00287537	1.5	1.11111	1.79167	4.61576	5.60129	0.985525	0.0817286
K01866	YARS, tyrS; tyrosyl-tRNA synthetase [EC:6.1.1.1]	0.00620714	3.2381	2.86111	3.52083	6.07849	6.8626	0.784113	0.0831768
K01835	pgm; phosphoglucomutase [EC:5.4.2.2]	0.00353716	1.84524	1.77778	1.89583	5.01141	5.95449	0.943078	0.0840808
K01142	E3.1.11.2, xthA; exodeoxyribonuclease III [EC:3.1.11.2]	0.00287537	1.5	1.36111	1.60417	4.95309	6.15932	1.20623	0.0851076
K02518	infA; translation initiation factor IF-1	0.00529432	2.7619	2.97222	2.60417	5.76885	6.72652	0.957677	0.0891953
K00404	ccoN; cytochrome c oxidase cbb3-type subunit I [EC:1.9.3.1]	0.00200819	1.04762	0.972222	1.10417	4.58956	3.87264	-0.71692	0.0907104
K03695	clpB; ATP-dependent Clp protease ATP-binding subunit ClpB	0.00273844	1.42857	0.916667	1.8125	4.0726	6.31837	2.24577	0.0936835
K02878	RP-L16, MRPL16, rplP; large subunit ribosomal protein L16	0.00972147	5.07143	4.91667	5.1875	6.76424	7.62105	0.856807	0.0981043
K01776	murI; glutamate racemase [EC:5.1.1.3]	0.0256044	13.3571	24.7222	4.83333	8.91627	6.62121	-2.29506	0.101311
K02899	RP-L27, MRPL27, rpmA; large subunit ribosomal protein L27	0.00917378	4.78571	4.55556	4.95833	6.83531	7.37796	0.542651	0.101841
K02316	dnaG; DNA primase [EC:2.7.7.101]	0.00241896	1.2619	0.944444	1.5	4.39335	5.268	0.874646	0.102238
K00764	purF, PPAT; amidophosphoribosyltransferase [EC:2.4.2.14]	0.00255588	1.33333	1.16667	1.45833	4.481	5.44522	0.964221	0.103802
K01985	5SrRNA, rrf; 5S ribosomal RNA	13.209	6890.79	5663.08	7811.56	17.119	17.6102	0.491106	0.104711
K01200	pulA; pullulanase [EC:3.2.1.41]	0.00260152	1.35714	1.19444	1.47917	4.76518	6.02446	1.25928	0.106678
K01952	PFAS, purL; phosphoribosylformylglycinamidine synthase [EC:6.3.5.3]	0.003811	1.9881	2.19444	1.83333	4.98516	5.76592	0.78076	0.107996
K03070	secA; preprotein translocase subunit SecA [EC:7.4.2.8]	0.00707431	3.69048	2.94444	4.25	6.34414	6.98205	0.637913	0.109411
K06207	typA, bipA; GTP-binding protein	0.00668637	3.4881	3.33333	3.60417	6.16325	6.97852	0.815266	0.112207
K02887	RP-L20, MRPL20, rplT; large subunit ribosomal protein L20	0.0132358	6.90476	6.36111	7.3125	7.13665	7.66572	0.529065	0.113372
K03100	lepB; signal peptidase I [EC:3.4.21.89]	0.00164307	0.857143	0.972222	0.770833	4.15145	5.31336	1.16191	0.114828
K00016	LDH, ldh; L-lactate dehydrogenase [EC:1.1.1.27]	0.0151755	7.91667	7.63889	8.125	7.54896	8.04354	0.494577	0.115301
K00927	PGK, pgk; phosphoglycerate kinase [EC:2.7.2.3]	0.00812405	4.2381	3.61111	4.70833	6.26464	6.82612	0.561477	0.117442
K03040	rpoA; DNA-directed RNA polymerase subunit alpha [EC:2.7.7.6]	0.0163166	8.5119	7.41667	9.33333	7.31973	7.80625	0.486518	0.117444
K00525	E1.17.4.1A, nrdA, nrdE; ribonucleoside-diphosphate reductase alpha chain [EC:1.17.4.1]	0.00351434	1.83333	1.66667	1.95833	5.22042	6.12511	0.90469	0.123323
K03544	clpX, CLPX; ATP-dependent Clp protease ATP-binding subunit ClpX	0.00536278	2.79762	1.77778	3.5625	5.69788	7.36711	1.66923	0.123525
K00609	pyrB, PYR2; aspartate carbamoyltransferase catalytic subunit [EC:2.1.3.2]	0.00260152	1.35714	1.30556	1.39583	4.69615	5.44318	0.747037	0.123607
K02314	dnaB; replicative DNA helicase [EC:3.6.4.12]	0.00387946	2.02381	2.05556	2	5.24917	6.1613	0.912134	0.126181
K02990	RP-S6, MRPS6, rpsF; small subunit ribosomal protein S6	0.0120491	6.28571	5.44444	6.91667	7.19438	7.75455	0.560167	0.127216
K01939	purA, ADSS; adenylosuccinate synthase [EC:6.3.4.4]	0.00230486	1.20238	0.972222	1.375	4.68462	5.86077	1.17615	0.128805
K15772	ganQ; arabinogalactan oligomer / maltooligosaccharide transport system permease protein	0.00844353	4.40476	6.47222	2.85417	6.97317	5.8977	-1.07547	0.129354
K12132	prkC, stkP; eukaryotic-like serine/threonine-protein kinase [EC:2.7.11.1]	0.00148332	0.77381	0.583333	0.916667	2.9508	5.44825	2.49745	0.130052
K01531	mgtA, mgtB; P-type Mg2+ transporter [EC:7.2.2.14]	0.00196255	1.02381	0.694444	1.27083	4.2328	5.09054	0.85774	0.130989
K03699	tlyC; putative hemolysin	0.00689175	3.59524	2.58333	4.35417	6.19291	7.16813	0.97522	0.132665
K00335	nuoF; NADH-quinone oxidoreductase subunit F [EC:7.1.1.2]	0.00305793	1.59524	0.944444	2.08333	4.47538	5.33107	0.855695	0.134164
K01940	argG, ASS1; argininosuccinate synthase [EC:6.3.4.5]	0.00171153	0.892857	0.861111	0.916667	3.81927	4.99698	1.17771	0.137289
K02355	fusA, GFM, EFG; elongation factor G	0.0344359	17.9643	17.4722	18.3333	8.48763	8.85513	0.367499	0.137786
K02469	gyrA; DNA gyrase subunit A [EC:5.6.2.2]	0.00305793	1.59524	1.63889	1.5625	4.81214	5.65441	0.842266	0.139158
K02884	RP-L19, MRPL19, rplS; large subunit ribosomal protein L19	0.0112961	5.89286	5.33333	6.3125	7.10173	7.72471	0.622975	0.139822
K14233	tRNA-Ser; tRNA Ser	0.265538	138.524	65.0556	193.625	10.6901	11.6993	1.00912	0.14014
K03553	recA; recombination protein RecA	0.00572791	2.9881	2.63889	3.25	5.9693	6.5121	0.542795	0.141793
K00134	GAPDH, gapA; glyceraldehyde 3-phosphate dehydrogenase [EC:1.2.1.12]	0.0370146	19.3095	18.4444	19.9583	8.76636	9.19567	0.429311	0.14182
K00336	nuoG; NADH-quinone oxidoreductase subunit G [EC:7.1.1.2]	0.00305793	1.59524	1.58333	1.60417	5.39926	4.69532	-0.703937	0.144893
K14229	tRNA-Lys; tRNA Lys	0.300088	156.548	148.306	162.729	11.5295	12.5378	1.00836	0.145933
K04047	dps; starvation-inducible DNA-binding protein	0.00794148	4.14286	3.08333	4.9375	6.16704	6.8839	0.716858	0.146734
K03075	secG; preprotein translocase subunit SecG	0.00328613	1.71429	1.63889	1.77083	4.81224	5.77748	0.965249	0.147218
K03705	hrcA; heat-inducible transcriptional repressor	0.00337741	1.7619	1.91667	1.64583	5.15748	6.4033	1.24582	0.15004
K02911	RP-L32, MRPL32, rpmF; large subunit ribosomal protein L32	0.00789584	4.11905	3.36111	4.6875	6.43421	7.26007	0.825861	0.151632
K03588	ftsW, spoVE; cell division protein FtsW	0.00152896	0.797619	0.75	0.833333	3.93383	4.79065	0.856817	0.152502
K15082	RAD7; DNA repair protein RAD7	0.0099725	5.20238	4.16667	5.97917	6.79242	7.96571	1.17329	0.152791
K00554	trmD; tRNA (guanine37-N1)-methyltransferase [EC:2.1.1.228]	0.0026928	1.40476	2.02778	0.9375	5.2927	4.3623	-0.930403	0.152905
K01893	NARS, asnS; asparaginyl-tRNA synthetase [EC:6.1.1.22]	0.00422177	2.20238	1.83333	2.47917	5.24961	6.20572	0.956108	0.155481
K02904	RP-L29, rpmC; large subunit ribosomal protein L29	0.00547689	2.85714	2.36111	3.22917	5.59243	6.25866	0.666235	0.15551
K02897	RP-L25, rplY; large subunit ribosomal protein L25	0.00378818	1.97619	1.22222	2.54167	4.66357	5.5033	0.839732	0.157764
K01881	PARS, proS; prolyl-tRNA synthetase [EC:6.1.1.15]	0.00385664	2.0119	1.77778	2.1875	5.16773	6.3433	1.17556	0.158877
K02931	RP-L5, MRPL5, rplE; large subunit ribosomal protein L5	0.0197624	10.3095	10.1667	10.4167	7.81645	8.21999	0.403542	0.160072
K00383	GSR, gor; glutathione reductase (NADPH) [EC:1.8.1.7]	0.00561381	2.92857	3.02778	2.85417	6.16578	7.00664	0.840862	0.161076
K00974	cca; tRNA nucleotidyltransferase (CCA-adding enzyme) [EC:2.7.7.72 3.1.3.- 3.1.4.-]	0.00422177	2.20238	2.05556	2.3125	5.41285	6.11152	0.698664	0.163429
K05362	murE; UDP-N-acetylmuramoyl-L-alanyl-D-glutamate-L-lysine ligase [EC:6.3.2.7]	0.00221357	1.15476	1.13889	1.16667	4.8071	5.55678	0.749678	0.1635
K10112	msmX, msmK, malK, sugC, ggtA, msiK; multiple sugar transport system ATP-binding protein	0.00205383	1.07143	0.833333	1.25	4.57676	5.49275	0.915982	0.165952
K02863	RP-L1, MRPL1, rplA; large subunit ribosomal protein L1	0.0249883	13.0357	12.3889	13.5208	8.1903	8.71739	0.527082	0.166696
K01925	murD; UDP-N-acetylmuramoylalanine--D-glutamate ligase [EC:6.3.2.9]	0.00182563	0.952381	0.888889	1	4.0159	4.86759	0.851691	0.167209
K03629	recF; DNA replication and repair protein RecF	0.00387946	2.02381	1.69444	2.27083	5.43877	6.17151	0.732743	0.169741
K01980	23SrRNA, rrl; 23S ribosomal RNA	14.2428	7430.06	8601.53	6551.46	17.3701	17.0168	-0.353293	0.169799
K18220	tetM, tetO; ribosomal protection tetracycline resistance protein	0.0153125	7.9881	11.8056	5.125	8.21546	7.07622	-1.13923	0.171949
K03076	secY; preprotein translocase subunit SecY	0.00787302	4.10714	3.72222	4.39583	6.42064	6.98091	0.560262	0.178748
K02916	RP-L35, MRPL35, rpmI; large subunit ribosomal protein L35	0.00429023	2.2381	2.44444	2.08333	5.45941	6.5489	1.08949	0.179917
K04567	KARS, lysS; lysyl-tRNA synthetase, class II [EC:6.1.1.6]	0.00588765	3.07143	2.80556	3.27083	5.95524	6.4394	0.484155	0.182277
K02112	ATPF1B, atpD; F-type H+/Na+-transporting ATPase subunit beta [EC:7.1.2.2 7.2.2.1]	0.00721123	3.7619	3.97222	3.60417	6.20698	6.67931	0.472335	0.186416
K03590	ftsA; cell division protein FtsA	0.00442715	2.30952	2.33333	2.29167	5.48288	6.0931	0.610217	0.18889
K04487	iscS, NFS1; cysteine desulfurase [EC:2.8.1.7]	0.00214511	1.11905	1.36111	0.9375	4.97834	4.28641	-0.691924	0.191183
K07568	queA; S-adenosylmethionine:tRNA ribosyltransferase-isomerase [EC:2.4.99.17]	0.00168871	0.880952	0.638889	1.0625	3.99862	4.90618	0.907562	0.194658
K02440	GLPF; glycerol uptake facilitator protein	0.00301229	1.57143	1.5	1.625	4.9709	5.69209	0.721195	0.195343
K02529	lacI, galR; LacI family transcriptional regulator	0.0124371	6.4881	10.8889	3.1875	7.9174	6.8201	-1.0973	0.196772
K14231	tRNA-Phe; tRNA Phe	0.102326	53.381	70.8611	40.2708	10.6187	10.0211	-0.597639	0.196795
K01652	E2.2.1.6L, ilvB, ilvG, ilvI; acetolactate synthase I/II/III large subunit [EC:2.2.1.6]	0.0022364	1.16667	1.08333	1.22917	4.63783	5.6292	0.991362	0.200527
K03046	rpoC; DNA-directed RNA polymerase subunit beta' [EC:2.7.7.6]	0.0319941	16.6905	11.6111	20.5	8.03251	8.86184	0.829327	0.20123
K01872	AARS, alaS; alanyl-tRNA synthetase [EC:6.1.1.7]	0.00565945	2.95238	2.86111	3.02083	6.03077	6.54608	0.515313	0.201785
K02838	frr, MRRF, RRF; ribosome recycling factor	0.00346869	1.80952	1.30556	2.1875	5.19525	5.72843	0.533177	0.202141
K01986	LSU5.8S; large subunit ribosomal RNA, 5.8S	0.0953891	49.7619	44.8611	53.4375	10.1438	10.7739	0.630019	0.204402
K00278	nadB; L-aspartate oxidase [EC:1.4.3.16]	0.00139204	0.72619	1.11111	0.4375	4.44281	3.44794	-0.994878	0.208793
K00566	mnmA, trmU; tRNA-uridine 2-sulfurtransferase [EC:2.8.1.13]	0.00230486	1.20238	1.02778	1.33333	4.66012	5.60731	0.947191	0.210199
K03531	ftsZ; cell division protein FtsZ	0.00351434	1.83333	1.86111	1.8125	5.05136	5.80394	0.752577	0.211796
K05592	deaD, cshA; ATP-dependent RNA helicase DeaD [EC:3.6.4.13]	0.00285254	1.4881	1.25	1.66667	4.65691	5.41406	0.75715	0.213803
K01937	pyrG, CTPS; CTP synthase [EC:6.3.4.2]	0.00253306	1.32143	1.08333	1.5	4.76309	5.74984	0.986751	0.214629
K03106	SRP54, ffh; signal recognition particle subunit SRP54 [EC:3.6.5.4]	0.00214511	1.11905	1.05556	1.16667	4.70905	5.59119	0.882146	0.21479
K14219	tRNA-Arg; tRNA Arg	1.56119	814.429	349.556	1163.08	13.4757	14.5527	1.07708	0.215716
K00164	OGDH, sucA; 2-oxoglutarate dehydrogenase E1 component [EC:1.2.4.2]	0.00456407	2.38095	2.30556	2.4375	6.11372	5.47343	-0.640296	0.219017
K02946	RP-S10, MRPS10, rpsJ; small subunit ribosomal protein S10	0.0110907	5.78571	6.55556	5.20833	6.91694	7.58864	0.6717	0.219676
K03596	lepA; GTP-binding protein LepA	0.00406202	2.11905	1.97222	2.22917	5.72644	6.34815	0.621706	0.220627
K03798	ftsH, hflB; cell division protease FtsH [EC:3.4.24.-]	0.00917378	4.78571	5.13889	4.52083	6.79572	7.26351	0.467796	0.221867
K15634	gpmB; probable phosphoglycerate mutase [EC:5.4.2.12]	0.00205383	1.07143	1.47222	0.770833	4.9161	4.24877	-0.667326	0.223438
K00928	lysC; aspartate kinase [EC:2.7.2.4]	0.00593329	3.09524	3.69444	2.64583	6.6158	6.10903	-0.506765	0.226741
K07497	K07497; putative transposase	0.00746226	3.89286	1.77778	5.47917	5.5642	8.12217	2.55796	0.228354
K03111	ssb; single-strand DNA-binding protein	0.0109766	5.72619	6.97222	4.79167	7.39347	6.90479	-0.488682	0.228555
K02356	efp; elongation factor P	0.00422177	2.20238	2.13889	2.25	5.56712	6.15225	0.58513	0.22904
K05366	mrcA; penicillin-binding protein 1A [EC:2.4.1.129 3.4.16.4]	0.00399356	2.08333	2.16667	2.02083	5.68521	6.43211	0.746905	0.231921
K11189	PTS-HPR; phosphocarrier protein	0.00200819	1.04762	1.30556	0.854167	4.68873	3.8346	-0.854129	0.234964
K02970	RP-S21, MRPS21, rpsU; small subunit ribosomal protein S21	0.0239614	12.5	13.3333	11.875	8.22515	8.64691	0.421768	0.237432
K02335	polA; DNA polymerase I [EC:2.7.7.7]	0.00597893	3.11905	3.38889	2.91667	6.07535	6.78937	0.714016	0.239626
K14225	tRNA-Gly; tRNA Gly	12.5911	6568.44	5804.75	7141.21	16.5189	16.9987	0.479867	0.241332
K01687	ilvD; dihydroxy-acid dehydratase [EC:4.2.1.9]	0.0049292	2.57143	2.83333	2.375	5.75006	6.16502	0.414959	0.244305
K01372	BLMH, pepC; bleomycin hydrolase [EC:3.4.22.40]	0.00486074	2.53571	2.30556	2.70833	5.86386	6.55055	0.686688	0.245162
K18474	fabM; trans-2-decenoyl-[acyl-carrier protein] isomerase [EC:5.3.3.14]	0.00476946	2.4881	3.11111	2.02083	5.68184	6.52125	0.839402	0.247093
K02622	parE; topoisomerase IV subunit B [EC:5.6.2.2]	0.00212229	1.10714	1	1.1875	4.23262	4.91573	0.683105	0.247659
K16087	TC.FEV.OM3, tbpA, hemR, lbpA, hpuB, bhuR, hugA, hmbR; hemoglobin/transferrin/lactoferrin receptor protein	0.00228204	1.19048	0.666667	1.58333	3.83669	4.52178	0.685092	0.249169
K01738	cysK; cysteine synthase [EC:2.5.1.47]	0.00228204	1.19048	1.16667	1.20833	4.8677	5.5463	0.678599	0.258032
K07483	K07483; transposase	0.00152896	0.797619	0.5	1.02083	3.52351	5.99797	2.47446	0.258395
K00057	gpsA; glycerol-3-phosphate dehydrogenase (NAD(P)+) [EC:1.1.1.94]	0.00419895	2.19048	1.91667	2.39583	5.83179	6.53234	0.700544	0.260774
K03073	secE; preprotein translocase subunit SecE	0.00232768	1.21429	1.30556	1.14583	4.86403	5.55269	0.688665	0.261125
K02996	RP-S9, MRPS9, rpsI; small subunit ribosomal protein S9	0.021474	11.2024	12	10.6042	8.08972	8.45727	0.367546	0.263599
K01803	TPI, tpiA; triosephosphate isomerase (TIM) [EC:5.3.1.1]	0.00367408	1.91667	1.91667	1.91667	5.28846	5.76141	0.472956	0.265873
K00963	UGP2, galU, galF; UTP--glucose-1-phosphate uridylyltransferase [EC:2.7.7.9]	0.00349151	1.82143	1.63889	1.95833	5.32787	6.55187	1.224	0.266357
K19972	psaC, scaB; manganese/zinc transport system permease protein	0.00424459	2.21429	2.16667	2.25	5.53931	6.05167	0.512358	0.269261
K01955	carB, CPA2; carbamoyl-phosphate synthase large subunit [EC:6.3.5.5]	0.0103604	5.40476	4.77778	5.875	7.01202	7.41171	0.399688	0.269643
K01915	glnA, GLUL; glutamine synthetase [EC:6.3.1.2]	0.00230486	1.20238	1.33333	1.10417	4.65932	5.48672	0.827402	0.270195
K00549	metE; 5-methyltetrahydropteroyltriglutamate--homocysteine methyltransferase [EC:2.1.1.14]	0.0111592	5.82143	5.94444	5.72917	6.8935	7.28634	0.392846	0.270772
K18698	blaTEM; beta-lactamase class A TEM [EC:3.5.2.6]	0.0040392	2.10714	3.91667	0.75	6.24173	4.247	-1.99473	0.273968
K02994	RP-S8, rpsH; small subunit ribosomal protein S8	0.00682329	3.55952	3.77778	3.39583	6.26103	6.66006	0.399028	0.276135
K01649	leuA, IMS; 2-isopropylmalate synthase [EC:2.3.3.13]	0.00187127	0.97619	0.805556	1.10417	4.0747	6.00907	1.93437	0.277343
K04069	pflA, pflC, pflE; pyruvate formate lyase activating enzyme [EC:1.97.1.4]	0.00499766	2.60714	2.66667	2.5625	6.09524	6.78893	0.693691	0.277502
K03744	lemA; LemA protein	0.00337741	1.7619	1.52778	1.9375	5.26429	5.81984	0.555555	0.277761
K00939	adk, AK; adenylate kinase [EC:2.7.4.3]	0.00244178	1.27381	1.27778	1.27083	4.6165	5.4486	0.8321	0.280702
K03217	yidC, spoIIIJ, OXA1, ccfA; YidC/Oxa1 family membrane protein insertase	0.00196255	1.02381	1.22222	0.875	4.69147	5.52539	0.833917	0.284103
K15770	cycB, ganO; arabinogalactan oligomer / maltooligosaccharide transport system substrate-binding protein	0.00800995	4.17857	4.41667	4	6.59638	7.0195	0.423115	0.287576
K02003	ABC.CD.A; putative ABC transport system ATP-binding protein	0.00543125	2.83333	2.66667	2.95833	5.9258	6.35191	0.426106	0.289288
K01358	clpP, CLPP; ATP-dependent Clp protease, protease subunit [EC:3.4.21.92]	0.00456407	2.38095	2.61111	2.20833	5.54017	6.21537	0.675202	0.291547
K00691	mapA; maltose phosphorylase [EC:2.4.1.8]	0.00301229	1.57143	1.55556	1.58333	5.23602	4.62548	-0.610544	0.29212
K02113	ATPF1D, atpH; F-type H+-transporting ATPase subunit delta	0.00193973	1.0119	1.22222	0.854167	4.86432	4.22749	-0.636828	0.29304
K00131	gapN; glyceraldehyde-3-phosphate dehydrogenase (NADP+) [EC:1.2.1.9]	0.00180281	0.940476	0.75	1.08333	4.27205	5.08586	0.813808	0.298172
K00262	E1.4.1.4, gdhA; glutamate dehydrogenase (NADP+) [EC:1.4.1.4]	0.00889994	4.64286	5.16667	4.25	6.61339	7.0905	0.477107	0.302023
K10773	NTH; endonuclease III [EC:4.2.99.18]	0.0013464	0.702381	0.5	0.854167	4.24179	5.10129	0.859498	0.30348
K09811	ftsX; cell division transport system permease protein	0.00298947	1.55952	1.88889	1.3125	5.34294	6.24434	0.901406	0.304473
K07265	kpsS, lipB; capsular polysaccharide export protein	0.00136922	0.714286	0.638889	0.770833	4.2436	3.43553	-0.808068	0.304666
K01819	E5.3.1.26, lacA, lacB; galactose-6-phosphate isomerase [EC:5.3.1.26]	0.00360562	1.88095	1.72222	2	5.40775	5.87974	0.471997	0.308825
K02933	RP-L6, MRPL6, rplF; large subunit ribosomal protein L6	0.0102007	5.32143	4.88889	5.64583	6.69564	7.03911	0.343468	0.310876
K01938	fhs; formate--tetrahydrofolate ligase [EC:6.3.4.3]	0.00312639	1.63095	1.69444	1.58333	4.98937	5.54797	0.5586	0.311443
K02982	RP-S3, rpsC; small subunit ribosomal protein S3	0.0220216	11.4881	9.91667	12.6667	7.96832	8.98712	1.0188	0.313039
K01489	cdd, CDA; cytidine deaminase [EC:3.5.4.5]	0.00216793	1.13095	1.41667	0.916667	4.76897	4.17588	-0.593095	0.313454
K00760	hprT, hpt, HPRT1; hypoxanthine phosphoribosyltransferase [EC:2.4.2.8]	0.0023505	1.22619	1.19444	1.25	4.29799	5.06852	0.770531	0.313885
K02337	dnaE; DNA polymerase III subunit alpha [EC:2.7.7.7]	0.00337741	1.7619	2.11111	1.5	5.65488	5.19589	-0.458993	0.313998
K00656	E2.3.1.54, pflD; formate C-acetyltransferase [EC:2.3.1.54]	0.0280006	14.6071	15.3611	14.0417	8.40895	8.7289	0.319949	0.322057
K07462	recJ; single-stranded-DNA-specific exonuclease [EC:3.1.-.-]	0.00232768	1.21429	1.44444	1.04167	4.89413	5.96259	1.06846	0.327499
K10040	peb1B, glnP, glnM; aspartate/glutamate/glutamine transport system permease protein	0.00175717	0.916667	0.833333	0.979167	4.60214	5.49506	0.892924	0.327948
K01892	HARS, hisS; histidyl-tRNA synthetase [EC:6.1.1.21]	0.00456407	2.38095	2.05556	2.625	5.53829	5.95796	0.419674	0.328716
K01874	MARS, metG; methionyl-tRNA synthetase [EC:6.1.1.10]	0.00753072	3.92857	3.41667	4.3125	6.18178	6.58753	0.405758	0.332293
K14232	tRNA-Pro; tRNA Pro	0.445385	232.345	217.528	243.458	12.562	11.92	-0.642006	0.333027
K08365	merR; MerR family transcriptional regulator, mercuric resistance operon regulatory protein	0.00714277	3.72619	3.44444	3.9375	6.37669	6.78878	0.412085	0.334139
K02796	PTS-Man-EIID, manZ; PTS system, mannose-specific IID component	0.00556817	2.90476	4	2.08333	6.36359	5.89718	-0.46641	0.334866
K06191	nrdH; glutaredoxin-like protein NrdH	0.00435869	2.27381	3.27778	1.52083	6.11688	5.20583	-0.911053	0.344287
K14221	tRNA-Asp; tRNA Asp	0.470898	245.655	377.944	146.438	13.6022	11.5898	-2.0124	0.344447
K03551	ruvB; holliday junction DNA helicase RuvB [EC:3.6.4.12]	0.0024646	1.28571	1.75	0.9375	5.47005	4.89293	-0.577126	0.344782
K00790	murA; UDP-N-acetylglucosamine 1-carboxyvinyltransferase [EC:2.5.1.7]	0.00545407	2.84524	3.22222	2.5625	6.13886	6.58054	0.44168	0.349665
K04077	groEL, HSPD1; chaperonin GroEL	0.0075079	3.91667	3.80556	4	6.52099	6.82001	0.299022	0.351459
K00820	glmS, GFPT; glutamine---fructose-6-phosphate transaminase (isomerizing) [EC:2.6.1.16]	0.010931	5.70238	4.83333	6.35417	6.95834	7.49539	0.537046	0.351691
K14218	tRNA-Ala; tRNA Ala	0.166087	86.6429	106.75	71.5625	11.229	10.4825	-0.746493	0.366383
K02313	dnaA; chromosomal replication initiator protein	0.00187127	0.97619	1.08333	0.895833	4.38122	4.97838	0.597158	0.369151
K21471	cwlO; peptidoglycan DL-endopeptidase CwlO [EC:3.4.-.-]	0.0131673	6.86905	7.94444	6.0625	7.28635	7.64124	0.354891	0.370966
K00925	ackA; acetate kinase [EC:2.7.2.1]	0.00317203	1.65476	1.83333	1.52083	5.19552	5.62196	0.426441	0.372388
K00415	QCR2, UQCRC2; ubiquinol-cytochrome c reductase core subunit 2	0.0201732	10.5238	8.69444	11.8958	8.00482	8.64793	0.643107	0.374568
K02795	PTS-Man-EIIC, manY; PTS system, mannose-specific IIC component	0.00355998	1.85714	2.13889	1.64583	5.64496	5.30147	-0.34349	0.375047
K02110	ATPF0C, atpE; F-type H+-transporting ATPase subunit c	0.00264716	1.38095	1.52778	1.27083	4.94083	5.306	0.365162	0.390713
K00163	aceE; pyruvate dehydrogenase E1 component [EC:1.2.4.1]	0.00150614	0.785714	0.972222	0.645833	4.88123	4.12689	-0.754336	0.390966
K00333	nuoD; NADH-quinone oxidoreductase subunit D [EC:7.1.1.2]	0.00816969	4.2619	4.88889	3.79167	6.94851	6.48502	-0.46349	0.391778
K01733	thrC; threonine synthase [EC:4.2.3.1]	0.00353716	1.84524	1.88889	1.8125	5.33174	5.75428	0.422547	0.395517
K03284	corA; magnesium transporter	0.00184845	0.964286	0.944444	0.979167	4.23945	4.84095	0.6015	0.403079
K01868	TARS, thrS; threonyl-tRNA synthetase [EC:6.1.1.3]	0.00417613	2.17857	1.97222	2.33333	5.61105	5.95666	0.345604	0.407851
K14223	tRNA-Gln; tRNA Gln	0.100798	52.5833	55.4167	50.4583	10.5166	9.92578	-0.590784	0.411642
K03497	parB, spo0J; ParB family transcriptional regulator, chromosome partitioning protein	0.0269965	14.0833	15.0278	13.375	8.45576	8.05374	-0.402023	0.412745
K15035	ssrA, sipB; transfer-messenger RNA	0.0113189	5.90476	7.05556	5.04167	6.24394	7.25559	1.01165	0.419557
K05847	opuA; osmoprotectant transport system ATP-binding protein [EC:7.6.2.9]	0.00182563	0.952381	0.888889	1	4.40759	4.96103	0.55344	0.420318
K02824	pyrP, uraA; uracil permease	0.00438151	2.28571	3.41667	1.4375	5.9051	5.25699	-0.648111	0.420669
K04043	dnaK, HSPA9; molecular chaperone DnaK	0.0263803	13.7619	14.0833	13.5208	8.38394	8.60415	0.220209	0.427424
K00973	E2.7.7.24, rfbA, rffH; glucose-1-phosphate thymidylyltransferase [EC:2.7.7.24]	0.00175717	0.916667	1.11111	0.770833	4.66147	4.1556	-0.505872	0.437116
K01889	FARSA, pheS; phenylalanyl-tRNA synthetase alpha chain [EC:6.1.1.20]	0.00353716	1.84524	2.22222	1.5625	5.68731	4.9706	-0.716703	0.440179
K03694	clpA; ATP-dependent Clp protease ATP-binding subunit ClpA	0.00125512	0.654762	0.638889	0.666667	3.70406	3.14917	-0.55489	0.441207
K02434	gatB, PET112; aspartyl-tRNA(Asn)/glutamyl-tRNA(Gln) amidotransferase subunit B [EC:6.3.5.6 6.3.5.7]	0.00349151	1.82143	1.75	1.875	5.15671	5.45886	0.302144	0.441235
K06286	ezrA; septation ring formation regulator	0.00426741	2.22619	2.63889	1.91667	5.7459	6.07463	0.328734	0.441332
K02956	RP-S15, MRPS15, rpsO; small subunit ribosomal protein S15	0.00433587	2.2619	2.22222	2.29167	5.75376	6.11407	0.360308	0.45122
K01972	E6.5.1.2, ligA, ligB; DNA ligase (NAD+) [EC:6.5.1.2]	0.0023505	1.22619	1.72222	0.854167	5.05891	4.5701	-0.488816	0.452975
K00332	nuoC; NADH-quinone oxidoreductase subunit C [EC:7.1.1.2]	0.0022364	1.16667	1.38889	1	5.18554	4.712	-0.473538	0.456305
K00053	ilvC; ketol-acid reductoisomerase [EC:1.1.1.86]	0.00378818	1.97619	2.66667	1.45833	5.77317	5.45023	-0.32294	0.46018
K00341	nuoL; NADH-quinone oxidoreductase subunit L [EC:7.1.1.2]	0.00212229	1.10714	1.30556	0.958333	4.84047	4.42379	-0.416673	0.462635
K03657	uvrD, pcrA; DNA helicase II / ATP-dependent DNA helicase PcrA [EC:3.6.4.12]	0.00458689	2.39286	2.19444	2.54167	5.96222	6.29385	0.331632	0.467116
K16786	ecfA1; energy-coupling factor transport system ATP-binding protein [EC:3.6.3.-]	0.00171153	0.892857	1.08333	0.75	4.29026	4.68292	0.392658	0.470849
K02992	RP-S7, MRPS7, rpsG; small subunit ribosomal protein S7	0.00947045	4.94048	5.16667	4.77083	6.82219	7.09869	0.276501	0.474016
K01869	LARS, leuS; leucyl-tRNA synthetase [EC:6.1.1.4]	0.00636688	3.32143	3.33333	3.3125	6.53316	6.87807	0.344907	0.478477
K14237	tRNA-Val; tRNA Val	0.129871	67.75	65.7778	69.2292	10.6093	10.2936	-0.315634	0.485001
K02056	ABC.SS.A; simple sugar transport system ATP-binding protein [EC:3.6.3.17]	0.0187583	9.78571	15.75	5.3125	8.39672	7.7163	-0.680414	0.487604
K01961	accC; acetyl-CoA carboxylase, biotin carboxylase subunit [EC:6.4.1.2 6.3.4.14]	0.00182563	0.952381	1.27778	0.708333	4.69605	4.26921	-0.426843	0.488153
K03555	mutS; DNA mismatch repair protein MutS	0.00175717	0.916667	1.19444	0.708333	4.57901	5.1653	0.586283	0.492703
K18692	cshB; ATP-dependent RNA helicase CshB [EC:3.6.4.13]	0.00239614	1.25	1.19444	1.29167	4.83003	5.2261	0.39607	0.493635
K17686	copA, ctpA, ATP7; P-type Cu+ transporter [EC:7.2.2.8]	0.00212229	1.10714	0.972222	1.20833	4.83062	5.38179	0.55117	0.496424
K03572	mutL; DNA mismatch repair protein MutL	0.0023505	1.22619	1.16667	1.27083	4.79418	5.09789	0.303702	0.497117
K00520	merA; mercuric reductase [EC:1.16.1.1]	0.0444312	23.1786	20.7222	25.0208	9.27203	9.58859	0.316563	0.499788
K00602	purH; phosphoribosylaminoimidazolecarboxamide formyltransferase / IMP cyclohydrolase [EC:2.1.2.3 3.5.4.10]	0.0039251	2.04762	2.55556	1.66667	5.55259	5.21032	-0.342269	0.500115
K01983	ffs; SRP RNA	0.00360562	1.88095	2.33333	1.54167	5.81292	5.04169	-0.771223	0.506542
K03575	mutY; A/G-specific adenine glycosylase [EC:3.2.2.31]	0.00324049	1.69048	1.83333	1.58333	5.07078	5.55247	0.481693	0.507569
K05823	dapL; N-acetyldiaminopimelate deacetylase [EC:3.5.1.47]	0.00244178	1.27381	1.33333	1.22917	4.6818	5.0102	0.328401	0.509286
K00101	lldD; L-lactate dehydrogenase (cytochrome) [EC:1.1.2.3]	0.0028069	1.46429	1.05556	1.77083	4.4862	4.93424	0.448046	0.510332
K02919	RP-L36, MRPL36, rpmJ; large subunit ribosomal protein L36	0.0050433	2.63095	2.72222	2.5625	6.23134	6.53451	0.303169	0.519492
K08483	PTS-EI.PTSI, ptsI; phosphotransferase system, enzyme I, PtsI [EC:2.7.3.9]	0.0110451	5.7619	6.16667	5.45833	6.96824	7.20215	0.23391	0.52323
K03218	rlmB; 23S rRNA (guanosine2251-2'-O)-methyltransferase [EC:2.1.1.185]	0.00271562	1.41667	1.47222	1.375	4.8668	5.24687	0.380067	0.523481
K02871	RP-L13, MRPL13, rplM; large subunit ribosomal protein L13	0.018804	9.80952	9.94444	9.70833	7.97744	8.14637	0.168921	0.531491
K02967	RP-S2, MRPS2, rpsB; small subunit ribosomal protein S2	0.0145594	7.59524	7.77778	7.45833	7.49425	7.65056	0.156308	0.531896
K00027	ME2, sfcA, maeA; malate dehydrogenase (oxaloacetate-decarboxylating) [EC:1.1.1.38]	0.00346869	1.80952	2.11111	1.58333	5.5244	5.20921	-0.31519	0.5334
K00384	trxB, TRR; thioredoxin reductase (NADPH) [EC:1.8.1.9]	0.00483792	2.52381	2.38889	2.625	5.93788	6.19527	0.25739	0.536588
K00382	DLD, lpd, pdhD; dihydrolipoamide dehydrogenase [EC:1.8.1.4]	0.0103604	5.40476	5.66667	5.20833	6.81475	7.06851	0.253768	0.54105
K15083	RAD16; DNA repair protein RAD16	2.17462	1134.44	1520.89	844.604	14.9688	14.62	-0.348802	0.55003
K02864	RP-L10, MRPL10, rplJ; large subunit ribosomal protein L10	0.016134	8.41667	9.83333	7.35417	7.46857	7.69504	0.22647	0.551798
K00948	PRPS, prsA; ribose-phosphate pyrophosphokinase [EC:2.7.6.1]	0.00278408	1.45238	1.41667	1.47917	5.17781	5.46337	0.28556	0.552742
K14236	tRNA-Tyr; tRNA Tyr	0.0563206	29.381	27.1111	31.0833	9.82663	9.38834	-0.438286	0.555945
K02945	RP-S1, rpsA; small subunit ribosomal protein S1	0.0305565	15.9405	16.4444	15.5625	8.52121	8.67356	0.152348	0.556229
K03043	rpoB; DNA-directed RNA polymerase subunit beta [EC:2.7.7.6]	0.0191235	9.97619	10.1667	9.83333	7.75999	7.90519	0.145201	0.558558
K00789	metK; S-adenosylmethionine synthetase [EC:2.5.1.6]	0.00367408	1.91667	1.80556	2	5.34571	5.58171	0.235999	0.559367
K01682	acnB; aconitate hydratase 2 / 2-methylisocitrate dehydratase [EC:4.2.1.3 4.2.1.99]	0.00730251	3.80952	3.41667	4.10417	6.31237	6.66141	0.34904	0.56107
K04074	divIVA; cell division initiation protein	0.0023505	1.22619	1.30556	1.16667	5.03041	4.74934	-0.281068	0.56294
K19971	psaA, scaA; manganese/zinc transport system substrate-binding protein	0.00670919	3.5	4.08333	3.0625	6.26485	6.49059	0.225742	0.565191
K02968	RP-S20, rpsT; small subunit ribosomal protein S20	0.0250568	13.0714	18.2778	9.16667	8.37406	7.92577	-0.448289	0.567767
K02433	gatA, QRSL1; aspartyl-tRNA(Asn)/glutamyl-tRNA(Gln) amidotransferase subunit A [EC:6.3.5.6 6.3.5.7]	0.00508894	2.65476	2.52778	2.75	5.80756	6.024	0.216441	0.569383
K00033	PGD, gnd, gntZ; 6-phosphogluconate dehydrogenase [EC:1.1.1.44 1.1.1.343]	0.00447279	2.33333	2.83333	1.95833	6.00701	5.79787	-0.20914	0.569911
K02357	tsf, TSFM; elongation factor Ts	0.00953891	4.97619	4.75	5.14583	6.81562	6.98837	0.17275	0.574008
K00962	pnp, PNPT1; polyribonucleotide nucleotidyltransferase [EC:2.7.7.8]	0.00387946	2.02381	1.97222	2.0625	5.57865	5.79968	0.221036	0.576625
K01879	glyS; glycyl-tRNA synthetase beta chain [EC:6.1.1.14]	0.00321767	1.67857	1.5	1.8125	5.30268	5.56732	0.26464	0.57709
K01956	carA, CPA1; carbamoyl-phosphate synthase small subunit [EC:6.3.5.5]	0.00232768	1.21429	1.16667	1.25	4.94697	5.30666	0.359693	0.57941
K02926	RP-L4, MRPL4, rplD; large subunit ribosomal protein L4	0.0154494	8.05952	8	8.10417	7.55894	7.73384	0.174906	0.579589
K00864	glpK, GK; glycerol kinase [EC:2.7.1.30]	0.00531714	2.77381	3.08333	2.54167	6.05862	6.31256	0.253945	0.580314
K01591	pyrF; orotidine-5'-phosphate decarboxylase [EC:4.1.1.23]	3.18114	1659.51	1393.61	1858.94	15.0125	15.2465	0.233982	0.584336
K00611	OTC, argF, argI; ornithine carbamoyltransferase [EC:2.1.3.3]	0.00219075	1.14286	1.11111	1.16667	4.51982	4.19864	-0.321174	0.587686
K07533	prsA; foldase protein PrsA [EC:5.2.1.8]	0.00255588	1.33333	1.77778	1	5.15215	4.86996	-0.282191	0.589298
K09903	pyrH; uridylate kinase [EC:2.7.4.22]	0.00209947	1.09524	1.27778	0.958333	4.87018	4.59277	-0.27741	0.595814
K14222	tRNA-Cys; tRNA Cys	0.0123002	6.41667	7.05556	5.9375	7.50492	6.96303	-0.541894	0.600117
K02890	RP-L22, MRPL22, rplV; large subunit ribosomal protein L22	0.00727969	3.79762	4.55556	3.22917	6.5651	6.75921	0.19411	0.600987
K03702	uvrB; excinuclease ABC subunit B	0.00260152	1.35714	1.27778	1.41667	4.95945	5.21976	0.260317	0.606903
K02520	infC, MTIF3; translation initiation factor IF-3	0.00292101	1.52381	1.5	1.54167	4.89344	5.16582	0.272382	0.607701
K03498	trkH, trkG, ktrB; trk system potassium uptake protein	0.00237332	1.2381	1.38889	1.125	4.98052	5.23988	0.259361	0.607827
K03438	mraW, rsmH; 16S rRNA (cytosine1402-N4)-methyltransferase [EC:2.1.1.199]	0.00314921	1.64286	1.97222	1.39583	5.42728	5.11734	-0.309942	0.614652
K00091	E1.1.1.219; dihydroflavonol-4-reductase [EC:1.1.1.219]	0.00216793	1.13095	0.861111	1.33333	4.61698	5.02603	0.409047	0.617759
K14235	tRNA-Trp; tRNA Trp	7.08319	3695.11	2915.28	4279.98	16.1298	16.2982	0.168434	0.626646
K03499	trkA, ktrA; trk system potassium uptake protein	0.00483792	2.52381	3.08333	2.10417	5.8185	6.07907	0.260576	0.629884
K02888	RP-L21, MRPL21, rplU; large subunit ribosomal protein L21	0.010041	5.2381	5.05556	5.375	6.84058	6.95336	0.112785	0.632662
K03697	clpE; ATP-dependent Clp protease ATP-binding subunit ClpE	0.00335459	1.75	1.77778	1.72917	5.6316	5.9461	0.314502	0.642331
K00850	pfkA, PFK; 6-phosphofructokinase 1 [EC:2.7.1.11]	0.00533996	2.78571	3.16667	2.5	6.082	6.30109	0.219094	0.646074
K03216	trmL, cspR; tRNA (cytidine/uridine-2'-O-)-methyltransferase [EC:2.1.1.207]	0.0263803	13.7619	12.6667	14.5833	8.38171	7.9448	-0.436915	0.646385
K03977	engA, der; GTPase	0.00177999	0.928571	0.888889	0.958333	4.51831	4.25436	-0.263951	0.646886
K04771	degP, htrA; serine protease Do [EC:3.4.21.107]	0.00835225	4.35714	3.55556	4.95833	6.43923	6.74509	0.305858	0.649589
K01478	arcA; arginine deiminase [EC:3.5.3.6]	0.00141486	0.738095	0.833333	0.666667	4.19482	4.65055	0.455725	0.649691
K14226	tRNA-His; tRNA His	0.468411	244.357	182.056	291.083	11.8259	12.1283	0.30244	0.651905
K00658	DLST, sucB; 2-oxoglutarate dehydrogenase E2 component (dihydrolipoamide succinyltransferase) [EC:2.3.1.61]	0.00305793	1.59524	1.38889	1.75	4.81846	5.09443	0.275974	0.658239
K01982	LSUrRNA; large subunit ribosomal RNA	0.462979	241.524	190.167	280.042	12.9708	13.2985	0.327657	0.659906
K03402	argR, ahrC; transcriptional regulator of arginine metabolism	0.00618432	3.22619	3.77778	2.8125	6.21811	6.42713	0.209014	0.665689
K00158	E1.2.3.3, poxL; pyruvate oxidase [EC:1.2.3.3]	0.0143768	7.5	9	6.375	7.64675	7.50075	-0.145998	0.679306
K02029	ABC.PA.P; polar amino acid transport system permease protein	0.00198537	1.03571	0.972222	1.08333	4.60766	4.87106	0.263401	0.681905
K02358	tuf, TUFM; elongation factor Tu	0.127269	66.3929	73.9167	60.75	10.6591	10.5715	-0.0875045	0.684534
K01902	sucD; succinyl-CoA synthetase alpha subunit [EC:6.2.1.5]	0.00203101	1.05952	1.13889	1	4.84561	4.64348	-0.202128	0.691057
K02794	PTS-Man-EIIB, manX; PTS system, mannose-specific IIB component [EC:2.7.1.191]	0.00276126	1.44048	1.66667	1.27083	5.34927	5.12894	-0.220328	0.691184
K01999	livK; branched-chain amino acid transport system substrate-binding protein	0.00337741	1.7619	1.97222	1.60417	5.39964	5.62757	0.227926	0.6915
K03210	yajC; preprotein translocase subunit YajC	0.00563663	2.94048	2.91667	2.95833	6.09703	6.29332	0.196292	0.692046
K14227	tRNA-Ile; tRNA Ile	0.132609	69.1786	52.3333	81.8125	10.4552	10.6492	0.193982	0.703448
K02914	RP-L34, MRPL34, rpmH; large subunit ribosomal protein L34	0.00823815	4.29762	4.52778	4.125	6.52899	6.69613	0.167141	0.704513
K03530	hupB; DNA-binding protein HU-beta	0.00376536	1.96429	2.19444	1.79167	5.69943	5.88022	0.18079	0.714169
K04564	SOD2; superoxide dismutase, Fe-Mn family [EC:1.15.1.1]	0.00620714	3.2381	3.16667	3.29167	6.25202	6.41165	0.15963	0.719202
K02902	RP-L28, MRPL28, rpmB; large subunit ribosomal protein L28	0.0132814	6.92857	7.97222	6.14583	7.28706	7.44354	0.156477	0.726682
K03048	rpoE; DNA-directed RNA polymerase subunit delta	0.00406202	2.11905	2.58333	1.77083	5.88857	5.73729	-0.151282	0.744753
K01951	guaA, GMPS; GMP synthase (glutamine-hydrolysing) [EC:6.3.5.2]	0.00335459	1.75	1.69444	1.79167	5.81395	5.62217	-0.19178	0.74994
K02886	RP-L2, MRPL2, rplB; large subunit ribosomal protein L2	0.0447279	23.3333	23.6389	23.1042	9.09184	9.18913	0.097292	0.751818
K07266	kpsC, lipA; capsular polysaccharide export protein	0.00187127	0.97619	1.25	0.770833	4.78255	4.60266	-0.179889	0.754375
K02907	RP-L30, MRPL30, rpmD; large subunit ribosomal protein L30	0.0119807	6.25	7.36111	5.41667	7.44106	7.20366	-0.237397	0.761209
K00346	nqrA; Na+-transporting NADH:ubiquinone oxidoreductase subunit A [EC:7.2.1.1]	0.00209947	1.09524	1.05556	1.125	4.74712	4.54274	-0.204381	0.765518
K02948	RP-S11, MRPS11, rpsK; small subunit ribosomal protein S11	0.0104517	5.45238	5.58333	5.35417	6.94543	7.04794	0.102506	0.770582
K00297	metF, MTHFR; methylenetetrahydrofolate reductase (NADPH) [EC:1.5.1.20]	0.00568227	2.96429	3.52778	2.54167	6.3117	6.51946	0.207762	0.770802
K01756	purB, ADSL; adenylosuccinate lyase [EC:4.3.2.2]	0.00700585	3.65476	5.33333	2.39583	6.69614	6.49807	-0.198074	0.770897
K14234	tRNA-Thr; tRNA Thr	5.28802	2758.62	1350.72	3814.54	15.1681	14.8393	-0.328822	0.770907
K14228	tRNA-Leu; tRNA Leu	0.433701	226.25	252.278	206.729	12.1921	12.3318	0.139646	0.775442
K06023	hprK, ptsK; HPr kinase/phosphorylase [EC:2.7.11.- 2.7.4.-]	0.00173435	0.904762	1.08333	0.770833	4.72398	4.55708	-0.166901	0.777423
K02836	prfB; peptide chain release factor 2	0.00271562	1.41667	1.38889	1.4375	4.96766	5.10024	0.132579	0.779945
K02906	RP-L3, MRPL3, rplC; large subunit ribosomal protein L3	0.016385	8.54762	8.97222	8.22917	7.48808	7.57303	0.0849489	0.780152
K03282	mscL; large conductance mechanosensitive channel	0.014103	7.35714	9.72222	5.58333	7.16187	7.29788	0.136007	0.785604
K02879	RP-L17, MRPL17, rplQ; large subunit ribosomal protein L17	0.00883148	4.60714	5.38889	4.02083	6.80865	6.72125	-0.0873977	0.793135
K01903	sucC; succinyl-CoA synthetase beta subunit [EC:6.2.1.5]	0.00565945	2.95238	3.11111	2.83333	6.36143	6.23351	-0.127912	0.79413
K01624	FBA, fbaA; fructose-bisphosphate aldolase, class II [EC:4.1.2.13]	0.0101551	5.29762	5.88889	4.85417	7.00547	7.08804	0.0825769	0.796486
K01710	E4.2.1.46, rfbB, rffG; dTDP-glucose 4,6-dehydratase [EC:4.2.1.46]	0.0023505	1.22619	1.27778	1.1875	4.97222	5.11742	0.145203	0.798096
K02935	RP-L7, MRPL12, rplL; large subunit ribosomal protein L7/L12	0.0232083	12.1071	13.1389	11.3333	8.16731	8.06609	-0.101221	0.798307
K14224	tRNA-Glu; tRNA Glu	7.94139	4142.81	3905.44	4320.83	16.5805	16.4958	-0.0847448	0.799002
K05808	yhbH; putative sigma-54 modulation protein	0.00168871	0.880952	1.02778	0.770833	4.34183	4.50377	0.161942	0.800434
K00975	glgC; glucose-1-phosphate adenylyltransferase [EC:2.7.7.27]	0.0028069	1.46429	1.55556	1.39583	5.19931	5.34969	0.150372	0.801649
K14230	tRNA-Met; tRNA Met	1.08098	563.917	485.444	622.771	14.0263	13.8918	-0.134492	0.815663
K00239	sdhA, frdA; succinate dehydrogenase / fumarate reductase, flavoprotein subunit [EC:1.3.5.1 1.3.5.4]	0.00401638	2.09524	1.75	2.35417	5.42412	5.53855	0.114435	0.815827
K15771	ganP; arabinogalactan oligomer / maltooligosaccharide transport system permease protein	0.0048151	2.5119	2.75	2.33333	5.70668	5.61539	-0.0912919	0.824675
K02867	RP-L11, MRPL11, rplK; large subunit ribosomal protein L11	0.00972147	5.07143	5.91667	4.4375	7.10174	7.01887	-0.082872	0.826372
K03367	dltA; D-alanine--poly(phosphoribitol) ligase subunit 1 [EC:6.1.1.13]	0.00248742	1.29762	1.41667	1.20833	5.14035	5.01809	-0.122264	0.826698
K00605	gcvT, AMT; aminomethyltransferase [EC:2.1.2.10]	0.00673201	3.5119	3.80556	3.29167	6.46502	6.57523	0.110208	0.82672
K03545	tig; trigger factor	0.0126881	6.61905	7.83333	5.70833	7.21224	7.13631	-0.0759259	0.837096
K01443	nagA, AMDHD2; N-acetylglucosamine-6-phosphate deacetylase [EC:3.5.1.25]	0.00177999	0.928571	1.13889	0.770833	4.54338	4.66795	0.124566	0.837832
K04072	adhE; acetaldehyde dehydrogenase / alcohol dehydrogenase [EC:1.2.1.10 1.1.1.1]	0.0114558	5.97619	7.27778	5	7.32402	7.40564	0.0816207	0.839432
K02959	RP-S16, MRPS16, rpsP; small subunit ribosomal protein S16	0.00846635	4.41667	4.30556	4.5	7.18907	7.11389	-0.0751862	0.848051
K02874	RP-L14, MRPL14, rplN; large subunit ribosomal protein L14	0.0145137	7.57143	8.19444	7.10417	7.47245	7.52355	0.0510989	0.84955
K03495	gidA, mnmG, MTO1; tRNA uridine 5-carboxymethylaminomethyl modification enzyme	0.00310357	1.61905	1.75	1.52083	5.335	5.41007	0.0750665	0.852475
K03168	topA; DNA topoisomerase I [EC:5.6.2.1]	0.00565945	2.95238	3.05556	2.875	6.11324	6.1852	0.0719639	0.855068
K01876	aspS; aspartyl-tRNA synthetase [EC:6.1.1.12]	0.00659508	3.44048	3.72222	3.22917	6.37069	6.43453	0.0638333	0.861494
K00561	ermC, ermA; 23S rRNA (adenine-N6)-dimethyltransferase [EC:2.1.1.184]	0.00159743	0.833333	0.75	0.895833	4.70277	4.57518	-0.127593	0.871438
K02851	wecA, tagO, rfe; UDP-GlcNAc:undecaprenyl-phosphate/decaprenyl-phosphate GlcNAc-1-phosphate transferase [EC:2.7.8.33 2.7.8.35]	0.00209947	1.09524	1.36111	0.895833	4.7577	4.84877	0.0910632	0.876136
K00688	PYG, glgP; glycogen phosphorylase [EC:2.4.1.1]	0.0116156	6.05952	6.91667	5.41667	7.22965	7.28532	0.0556722	0.876364
K01060	cah; cephalosporin-C deacetylase [EC:3.1.1.41]	0.00282972	1.47619	1.61111	1.375	4.98255	4.87977	-0.102779	0.880231
K02954	RP-S14, MRPS14, rpsN; small subunit ribosomal protein S14	0.00344587	1.79762	1.91667	1.70833	5.28276	5.34018	0.0574238	0.882144
K14220	tRNA-Asn; tRNA Asn	0.132472	69.1071	65	72.1875	10.9522	11.0365	0.0842784	0.892234
K02115	ATPF1G, atpG; F-type H+-transporting ATPase subunit gamma	0.00282972	1.47619	1.69444	1.3125	5.32488	5.26174	-0.0631348	0.895281
K02030	ABC.PA.S; polar amino acid transport system substrate-binding protein	0.00239614	1.25	1.16667	1.3125	5.06138	4.98665	-0.0747358	0.896906
K01878	glyQ; glycyl-tRNA synthetase alpha chain [EC:6.1.1.14]	0.00301229	1.57143	1.44444	1.66667	5.47679	5.41625	-0.0605369	0.899157
K02777	PTS-Glc-EIIA, crr; PTS system, sugar-specific IIA component [EC:2.7.1.-]	0.0125284	6.53571	6.88889	6.27083	7.32483	7.37223	0.0474007	0.905725
K01870	IARS, ileS; isoleucyl-tRNA synthetase [EC:6.1.1.5]	0.0036969	1.92857	2.02778	1.85417	5.93725	5.87895	-0.0583045	0.907475
K00412	CYTB, petB; ubiquinol-cytochrome c reductase cytochrome b subunit	0.00611586	3.19048	3.33333	3.08333	6.24663	6.191	-0.0556287	0.909905
K02558	mpl; UDP-N-acetylmuramate: L-alanyl-gamma-D-glutamyl-meso-diaminopimelate ligase [EC:6.3.2.45]	0.00114102	0.595238	0.527778	0.645833	3.59865	3.68162	0.0829762	0.916207
K02909	RP-L31, rpmE; large subunit ribosomal protein L31	0.011433	5.96429	5.63889	6.20833	7.44916	7.49033	0.0411715	0.922379
K20107	PTS-Mal-EIIB, malT; PTS system, maltose-specific IIB component [EC:2.7.1.208]	0.0124599	6.5	6.88889	6.20833	7.32483	7.36279	0.0379584	0.924601
K20108	PTS-Mal-EIIC, malT; PTS system, maltose-specific IIC component	0.0124599	6.5	6.88889	6.20833	7.32483	7.36279	0.0379584	0.924601
K02892	RP-L23, MRPL23, rplW; large subunit ribosomal protein L23	0.00956173	4.9881	4.83333	5.10417	6.92138	6.95387	0.032489	0.92775
K15987	hppA; K(+)-stimulated pyrophosphate-energized sodium pump	0.00262434	1.36905	1.05556	1.60417	4.89749	4.84478	-0.0527098	0.93125
K02876	RP-L15, MRPL15, rplO; large subunit ribosomal protein L15	0.00488356	2.54762	3.02778	2.1875	5.65239	5.62239	-0.0299943	0.933927
K12556	pbp2X; penicillin-binding protein 2X	0.00175717	0.916667	0.888889	0.9375	4.31639	4.2725	-0.0438906	0.934761
K02950	RP-S12, MRPS12, rpsL; small subunit ribosomal protein S12	0.0246916	12.881	13.1389	12.6875	8.53504	8.56489	0.0298445	0.93701
K00240	sdhB, frdB; succinate dehydrogenase / fumarate reductase, iron-sulfur subunit [EC:1.3.5.1 1.3.5.4]	0.00511176	2.66667	2.63889	2.6875	5.83588	5.78798	-0.0479094	0.93807
K02108	ATPF0A, atpB; F-type H+-transporting ATPase subunit a	0.00335459	1.75	1.91667	1.625	5.22885	5.2661	0.0372502	0.93981
K02078	acpP; acyl carrier protein	0.00686893	3.58333	4.33333	3.02083	6.53494	6.50242	-0.0325192	0.940394
K04042	glmU; bifunctional UDP-N-acetylglucosamine pyrophosphorylase / Glucosamine-1-phosphate N-acetyltransferase [EC:2.7.7.23 2.3.1.157]	0.00230486	1.20238	1.36111	1.08333	4.98474	5.02287	0.0381231	0.941456
K03979	obgE, cgtA, MTG2; GTPase [EC:3.6.5.-]	0.00296665	1.54762	1.66667	1.45833	5.13424	5.10952	-0.0247118	0.954285
K03701	uvrA; excinuclease ABC subunit A	0.00410766	2.14286	2.13889	2.14583	5.58989	5.61207	0.0221841	0.954594
K02988	RP-S5, MRPS5, rpsE; small subunit ribosomal protein S5	0.012323	6.42857	6.97222	6.02083	7.27755	7.26479	-0.0127596	0.967001
K02986	RP-S4, rpsD; small subunit ribosomal protein S4	0.0399584	20.8452	22.1389	19.875	9.00105	8.99098	-0.0100708	0.971767
K02952	RP-S13, rpsM; small subunit ribosomal protein S13	0.0228432	11.9167	14.2778	10.1458	8.34807	8.33799	-0.0100777	0.972853
K00133	asd; aspartate-semialdehyde dehydrogenase [EC:1.2.1.11]	0.00362844	1.89286	1.88889	1.89583	5.6174	5.63341	0.0160143	0.97295
K00342	nuoM; NADH-quinone oxidoreductase subunit M [EC:7.1.1.2]	0.00205383	1.07143	1.05556	1.08333	4.47505	4.48624	0.0111905	0.983143
K09698	gltX; nondiscriminating glutamyl-tRNA synthetase [EC:6.1.1.24]	0.00198537	1.03571	1.22222	0.895833	4.54356	4.55205	0.00848588	0.985352
K02004	ABC.CD.P; putative ABC transport system permease protein	0.00830661	4.33333	4.97222	3.85417	6.56902	6.56065	-0.00836888	0.986411
K00413	CYC1, CYT1, petC; ubiquinol-cytochrome c reductase cytochrome c1 subunit	0.00903686	4.71429	4.97222	4.52083	6.74873	6.7377	-0.0110298	0.98704
K14982	ciaH; two-component system, OmpR family, sensor histidine kinase CiaH [EC:2.7.13.3]	0.00180281	0.940476	1.13889	0.791667	4.83684	4.83993	0.00309297	0.996247
