# Supplementary material for: The oral microbiome of early stage Parkinson’s disease and its relationship with functional measures of motor and non-motor function
Source: PLoS One. 2019 Jun 27;14(6):e0218252. doi: 10.1371/journal.pone.0218252 (PMC6597068; doi:10.1371/journal.pone.0218252)
Supplement: S7 Table — (XLSX) [file pone.0218252.s010.xlsx]

## Sheet: Sheet1
Biological Process Gene Ontology (GO)
GO-term	Description	Count in gene set	FDR
GO:0033273	Response to vitamin	3 of 87	0.004
GO:0032355	Response to estradiol	3 of 126	0.004
GO:0014009	Glial cell proliferation	2 of 10	0.004
GO:0071295	Cellular response to vitamin	2 of 23	0.0072
GO:0046677	Response to antibiotic	3 of 305	0.0259
GO:0042493	Response to drug	4 of 900	0.0259
GO:0033993	Response to lipid	4 of 825	0.0259
GO:0014070	Response to organic cyclic compound	4 of 873	0.0259
GO:0009725	Response to hormone	4 of 854	0.0259
GO:0006979	Response to oxidative stress	3 of 373	0.0259
