# Supplementary material for: The oral microbiome of early stage Parkinson’s disease and its relationship with functional measures of motor and non-motor function
Source: PLoS One. 2019 Jun 27;14(6):e0218252. doi: 10.1371/journal.pone.0218252 (PMC6597068; doi:10.1371/journal.pone.0218252)
Supplement: S8 Table — (XLSX) [file pone.0218252.s011.xlsx]

## Sheet: Sheet3
	Spearman Rank Correlation										Bonferroni Corrected P Values
Taxon/Gene	KIF21B	EEF2	PENK	TRAPPC9	EGFLAM	ABHD2	COL1A1	CRAMP1	COLGALT1		KIF21B	EEF2	PENK	TRAPPC9	EGFLAM	ABHD2	COL1A1	CRAMP1	COLGALT1
1980001: Cellulosimicrobium sp. TH-20	0.40309	0.35162	0.21299	0.44614	0.19822	0.34711	0.40612	0.45574	0.49276		0.0543224	0.39278	1	0.00796106	1	0.460064	0.0478586	0.0050017	0.000726251
904: Acidaminococcus	0.23645	0.15689	0.20176	0.13512	0.012966	0.25506	0.2062	0.19742	0.19563		1	1	1	1	1	1	1	1	1
1404: Bacillus megaterium	0.072553	0.21304	0.24416	0.17724	0.24977	0.15585	0.13688	0.18785	0.03056		1	1	1	1	1	1	1	1	1
1581038: Bacillus sp. FJAT-22090	0.1211	0.23168	0.21927	0.33786	0.11262	0.30236	0.29788	0.30536	0.18591		1	1	1	0.63194	1	1	1	1	1
1678: Bifidobacterium	0.51922	0.44467	0.063823	0.3357	0.086374	0.34916	0.44067	0.35554	0.46226		0.000158106	0.00853864	1	0.679493	1	0.428236	0.0103118	0.341618	0.00361871
28025: Bifidobacterium animalis	0.3802	0.47412	0.18655	0.31966	0.070584	0.33247	0.36322	0.38897	0.42265		0.136295	0.0019729	1	1	1	0.756945	0.258582	0.0965714	0.0234417
216816: Bifidobacterium longum	0.49261	0.34205	0.18177	0.37806	0.32056	0.32456	0.38498	0.33665	0.38527		0.000732299	0.547911	1	0.14804	1	0.980834	0.113101	0.658136	0.111846
234: Brucella	0.17633	0.13507	0.14042	0.18132	0.12465	0.25199	0.15713	0.27919	0.258		1	1	1	1	1	1	1	1	1
1032069: Campylobacter ureolyticus RIGS 9880	0.16551	0.35155	0.51765	0.36305	0.47351	0.3953	0.27978	0.35752	0.18794		1	0.393725	0.00017371	0.260223	0.00203734	0.0748742	1	0.318125	1
1535326: Candida	0.067281	0.16881	-0.11833	0.11105	-0.17088	0.043991	0.042508	0.17116	0.13344		1	1	1	1	1	1	1	1	1
237561: Candida albicans SC5314	0.17238	0.24839	-0.10251	0.15446	-0.11394	0.085664	0.14304	0.3167	0.22167		1	1	1	1	1	1	1	1	1
573826: Candida dubliniensis CD36	0.21848	0.27438	-0.090573	0.27237	-0.19016	0.16545	0.20205	0.27311	0.26411		1	1	1	1	1	1	1	1	1
511435: Candidatus Azobacteroides pseudotrichonymphae	0.16332	0.23169	0.28182	0.35967	0.27381	0.30408	0.27976	0.22215	0.12431		1	1	1	0.294409	1	1	1	1	1
860228: Capnocytophaga canimorsus Cc5	0.18663	0.29762	0.32465	0.47661	0.3266	0.37447	0.30871	0.38101	0.28909		1	1	0.977848	0.00173215	0.918049	0.169862	1	0.132096	1
59732: Chryseobacterium	0.11225	0.14007	0.44507	0.4242	0.49698	0.32372	0.22703	0.29574	0.090228		1	1	0.00837799	0.0218862	0.000574295	1	1	1	1
1721091: Chryseobacterium sp. IHB B 17019	0.11773	0.15645	0.50424	0.40417	0.53209	0.33992	0.17258	0.28347	0.10551		1	1	0.000380873	0.0519372	7.18162e-05	0.589226	1	1	1
531844: Flavobacteriaceae bacterium 3519-10	0.1732	0.2281	0.33979	0.36751	0.36141	0.25675	0.17761	0.16469	0.026574		1	1	0.59191	0.220729	0.27636	1	1	1	1
2702: Gardnerella vaginalis	0.32271	0.31568	0.0644	0.21956	-0.013744	0.20306	0.2879	0.37188	0.27969		1	1	1	1	1	1	1	0.187363	1
402384: Halobacillus mangrovi	0.20116	0.22375	0.53044	0.4359	0.54653	0.2529	0.30925	0.28696	0.075966		1	1	7.96068e-05	0.0128758	2.84676e-05	1	1	1	1
1578: Lactobacillus	0.30409	0.39076	0.0065306	0.32593	0.063605	0.33971	0.37282	0.30094	0.40225		1	0.0899186	1	0.938234	1	0.59346	0.180847	1	0.0562615
272621: Lactobacillus acidophilus NCFM	0.096546	0.078447	-0.0087888	0.13278	-0.12812	0.056748	0.095338	0.097186	0.0023453		1	1	1	1	1	1	1	1	1
1613: Lactobacillus fermentum	0.16282	0.13274	-0.25055	0.009462	-0.20159	0.0077177	0.10177	0.043111	0.17305		1	1	1	1	1	1	1	1	1
1590: Lactobacillus plantarum	0.37213	0.34004	0.15713	0.39671	0.065813	0.36916	0.26844	0.41404	0.40795		0.185621	0.586845	1	0.0706784	1	0.207499	1	0.034161	0.0442978
1598: Lactobacillus reuteri	0.14366	0.25691	-0.19183	0.19513	-0.010393	0.2256	0.25923	0.18005	0.24808		1	1	1	1	1	1	1	1	1
1069534: Lactobacillus ruminis ATCC 27782	0.23401	0.38709	0.023562	0.33027	0.077809	0.29786	0.37219	0.2388	0.24515		1	0.10406	1	0.814136	1	1	0.185212	1	1
1624: Lactobacillus salivarius	0.21396	0.34333	0.27635	0.30299	0.11173	0.34146	0.30627	0.31459	0.28791		1	0.524286	1	1	1	0.5591	1	1	1
1850246: Lutibacter sp. LPB0138	0.03932	0.11908	0.36066	0.25166	0.20554	0.26757	0.15204	0.28301	0.15567		1	1	0.283999	1	1	1	1	1	1
407: Methylobacterium	0.22275	0.21571	-0.026208	0.28842	0.0081321	0.23116	0.23904	0.23599	0.33099		1	1	1	1	1	1	1	1	0.794858
864564: Parascardovia denticolens	0.35883	0.27328	-0.12061	0.21615	0.042166	0.23035	0.37726	0.21637	0.37431		0.303424	1	1	1	1	1	0.152678	1	0.17089
1827: Rhodococcus	0.20625	0.25684	0.38895	0.41065	0.35193	0.32805	0.32017	0.3497	0.21417		1	1	0.096647	0.039501	0.388433	0.875448	1	0.420185	1
1723645: Rhodococcus sp. 008	0.32637	0.21324	0.043924	0.32946	0.046509	0.2449	0.33487	0.26977	0.4245		0.924853	1	1	0.835909	1	1	0.698809	1	0.0215955
559292: Saccharomyces cerevisiae S288c	0.015822	0.028449	-0.096906	0.072985	-0.074124	0.15648	0.11344	0.13716	0.045909		1	1	1	1	1	1	1	1	1
1150468: Scardovia inopinata JCM 12537	0.29702	0.3374	-0.013196	0.22682	0.059655	0.29559	0.36137	0.32276	0.33693		1	0.641655	1	1	1	1	0.276696	1	0.652088
1309: Streptococcus mutans	0.37597	0.31894	-0.10901	0.26541	-0.035539	0.18518	0.36486	0.24839	0.43295		0.160412	1	1	1	1	1	0.243432	1	0.0147401
890041: Streptococcus phage PhiSpn_200	-0.072303	0.034633	0.09926	0.11641	0.17529	0.13119	0.035412	0.078025	0.070207		1	1	1	1	1	1	1	1	1
1156431: Streptococcus sp. I-G2	0.25374	0.26512	0.38046	0.478	0.4913	0.31038	0.37206	0.34318	0.27271		1	1	0.134954	0.00161036	0.000786845	1	0.186131	0.527045	1
4950: Torulaspora delbrueckii	0.070545	0.11631	-0.1097	0.090378	-0.1474	0.10937	0.059018	0.092875	0.059668		1	1	1	1	1	1	1	1	1
1689: Bifidobacterium dentium	0.23297	0.14099	-0.19739	0.075512	0.0045312	0.15264	0.22465	0.098881	0.35174		1	1	1	1	1	1	1	1	0.391041
9: Buchnera aphidicola	0.040474	0.04307	0.52015	0.29402	0.31559	0.31736	0.16385	0.19629	0.03649		1	1	0.000149548	1	1	1	1	1	1
28447: Clavibacter michiganensis	0.25811	0.17146	0.16283	0.23201	0.13049	0.22187	0.17072	0.15776	0.28328		1	1	1	1	1	1	1	1	1
1790137: Wenyingzhuangia fucanilytica	0.13102	0.17224	0.40032	0.25414	0.3573	0.25377	0.22121	0.18763	0.043186		1	1	0.0609601	1	0.320661	1	1	1	1
1579: Lactobacillus acidophilus	-0.18789	-0.1367	-0.28497	-0.10188	-0.20532	-0.10932	-0.14348	-0.11396	-0.17811		1	1	1	1	1	1	1	1	1
