# Supplementary material for: The oral microbiome of early stage Parkinson’s disease and its relationship with functional measures of motor and non-motor function
Source: PLoS One. 2019 Jun 27;14(6):e0218252. doi: 10.1371/journal.pone.0218252 (PMC6597068; doi:10.1371/journal.pone.0218252)
Supplement: S9 Table — (XLSX) [file pone.0218252.s012.xlsx]

## Sheet: Best correlations - uBiome only
% Female	R	Age	R	Weight	R	BMI	R	TMA_Time	R	TMA_Score	R	TMB_Time	R	TMB_Score	R	DSF_Time	R	DSF_Score	R	DSR_Time	R	DSR_Score	R
1723645: Rhodococcus sp. 008	0.253	858619: Corynebacterium variabile DSM 44702	0.388	1598: Lactobacillus reuteri	0.287	553174: Prevotella melaninogenica ATCC 25845	0.277	1598: Lactobacillus reuteri	0.588	203491: Fusobacteriales	0.299	1112204: Gordonia polyisoprenivorans VH2	0.624	297352: Lactococcus piscium MKFS47	0.379	858619: Corynebacterium variabile DSM 44702	0.43	755178: Cyanobacterium aponinum PCC 10605	0.344	1150461: Bifidobacterium scardovii JCM 12489 = DSM 13734	0.35	1360: Lactococcus lactis subsp. lactis	0.37
595494: Tolumonas auensis DSM 9187	0.251	306537: Corynebacterium jeikeium K411	0.33	1534: Clostridium kluyveri	0.284	469378: Cryptobacterium curtum DSM 15641	0.275	516950: Streptococcus pneumoniae CGSP14	0.573	712357: Leptotrichia sp. oral taxon 212	0.295	1328: Streptococcus anginosus	0.604	531844: Flavobacteriaceae bacterium 3519-10	0.375	35755: Corynebacterium kutscheri	0.371	203491: Fusobacteriales	0.337	284812: Schizosaccharomyces pombe 972h-	0.339	1762: Mycobacteriaceae	0.347
643867: Marivirga tractuosa DSM 4126	0.248	1072256: Corynebacterium uterequi	0.324	516950: Streptococcus pneumoniae CGSP14	0.277	1360: Lactococcus lactis subsp. lactis	0.272	1436725: Streptococcus thermophilus TH1477	0.559	1166018: Fibrella aestuarina BUZ 2	0.289	242231: Neisseria gonorrhoeae FA 1090	0.591	1042156: Clostridium sp. SY8519	0.323	713: Actinobacillus	0.366	519441: Streptobacillus moniliformis DSM 12112	0.337	5506: Fusarium	0.334	1302: Streptococcus gordonii	0.319
1642646: Petrimonas mucosa	0.243	555079: Thermosediminibacter oceani DSM 16646	0.316	697281: Mahella australiensis 50-1 BON	0.276	1236517: Prevotella fusca JCM 17724	0.271	487214: Streptococcus pneumoniae Hungary19A-6	0.419	1307442: Fusobacterium hwasookii ChDC F174	0.274	306537: Corynebacterium jeikeium K411	0.576	488222: Streptococcus pneumoniae JJA	0.301	2104: Mycoplasma pneumoniae	0.339	712528: Selenomonas sp. oral taxon 126	0.332	334819: Fusarium verticillioides 7600	0.334	210007: Streptococcus mutans UA159	0.312
36809: Mycobacterium abscessus	0.24	1375: Aerococcus	0.308	417290: Saccharopolyspora erythraea prophage pSE211	0.264	1358: Lactococcus lactis	0.242	512566: Streptococcus pneumoniae G54	0.406	633807: Vagococcus penaei	0.27	862970: Streptococcus anginosus C1051	0.575	1790137: Wenyingzhuangia fucanilytica	0.299	1064535: Megasphaera elsdenii DSM 20460	0.313	531844: Flavobacteriaceae bacterium 3519-10	0.318	37927: Sinomonas atrocyanea	0.327	467705: Streptococcus gordonii str. Challis substr. CH1	0.312
1208920: Candidatus Kinetoplastibacterium oncopeltii TCC290E	-0.221	1461582: Jeotgalicoccus saudimassiliensis	-0.317	1401325: Ornithobacterium rhinotracheale ORT-UMN 88	-0.231	1719: Corynebacterium pseudotuberculosis	-0.284	34085: Riemerella anatipestifer	-0.206	226: Alteromonas	-0.343	28091: Neisseria weaveri	-0.147	545694: Treponema primitia ZAS-2	-0.312	1224: Proteobacteria	-0.276	1224: Proteobacteria	-0.465	821: Bacteroides vulgatus	-0.241	1834200: Parabacteroides sp. YL27	-0.262
1502: Clostridium perfringens	-0.231	426114: Thiomonas arsenitoxydans	-0.317	469607: Fusobacterium nucleatum subsp. animalis 4_8	-0.238	652: Aeromonas schubertii	-0.299	1352940: Elizabethkingia anophelis FMS-007	-0.215	1436725: Streptococcus thermophilus TH1477	-0.345	1166018: Fibrella aestuarina BUZ 2	-0.151	706587: Desulfomonile tiedjei DSM 6799	-0.327	206351: Neisseriales	-0.299	1346: Streptococcus iniae	-0.471	1403335: Porphyromonas gingivalis 381	-0.249	984262: Saprospira grandis str. Lewin	-0.267
1434306: Streptomyces albulus ZPM	-0.237	1477: Paenibacillus larvae subsp. pulvifaciens	-0.318	203275: Tannerella forsythia 92A2	-0.247	1482: Virgibacillus halodenitrificans	-0.314	1166018: Fibrella aestuarina BUZ 2	-0.219	1598: Lactobacillus reuteri	-0.356	572544: Ilyobacter polytropus DSM 2926	-0.153	762948: Rothia dentocariosa ATCC 17931	-0.33	1662285: Methylophilus sp. TWE2	-0.321	1016: Capnocytophaga	-0.481	399497: Tessaracoccus flavescens	-0.25	374: Bradyrhizobium	-0.269
1534: Clostridium kluyveri	-0.247	667015: Bacteroides salanitronis DSM 18170	-0.34	1723645: Rhodococcus sp. 008	-0.249	156978: Corynebacterium imitans	-0.337	1156433: Streptococcus sp. I-P16	-0.243	487214: Streptococcus pneumoniae Hungary19A-6	-0.366	595494: Tolumonas auensis DSM 9187	-0.159	374: Bradyrhizobium	-0.332	305: Ralstonia solanacearum	-0.332	206351: Neisseriales	-0.501	1871021: Lachnoclostridium phocaeense	-0.259	1562970: Fermentimonas caenicola	-0.3
1768: Mycobacterium kansasii	-0.264	1429044: Vibrio parahaemolyticus UCM-V493	-0.362	931626: Acetobacterium woodii DSM 1030	-0.27	1376: Aerococcus urinae	-0.344	1606016: Elizabethkingia endophytica	-0.267	374: Bradyrhizobium	-0.409	1156433: Streptococcus sp. I-P16	-0.186	1528099: Lawsonella clevelandensis	-0.337	506: Alcaligenaceae	-0.352	506: Alcaligenaceae	-0.516	96345: Flavobacterium psychrophilum	-0.348	1901: Streptomyces clavuligerus	-0.341
TLEO	R	TLEC	R	TSEO	R	TSEC	R	TLEOFP	R	TLECFP	R	TSEOFP	R	TSECFP	R	HT	R	TMB_Dual_Bal	R	TMB_Dual_CogS	R	TMB_Dual_CogT	R	SRT	R	PRT	R	GNG	R
880073: Caldithrix abyssi DSM 13497	0.263	880073: Caldithrix abyssi DSM 13497	0.212	908937: Prevotella dentalis DSM 3688	0.214	848: Fusobacterium	0.281	880073: Caldithrix abyssi DSM 13497	0.263	862968: Streptococcus constellatus subsp. pharyngis C818	0.23	1763: Mycobacterium	0.24	767031: Prevotella denticola F0289	0.376	862964: Haemophilus influenzae 10810	0.274	53354: Streptococcus gallolyticus subsp. gallolyticus	0.247	189423: Streptococcus pneumoniae 670-6B	0.597	1436725: Streptococcus thermophilus TH1477	0.434	1116391: Paenibacillus mucilaginosus 3016	0.352	297352: Lactococcus piscium MKFS47	0.337	378753: Kocuria rhizophila DC2201	0.255
935589: Neisseria meningitidis NZ-05/33	0.223	467705: Streptococcus gordonii str. Challis substr. CH1	0.207	211114: Allokutzneria albata	0.204	246787: Bacteroides cellulosilyticus	0.271	862967: Streptococcus intermedius B196	0.258	189423: Streptococcus pneumoniae 670-6B	0.228	1300: Streptococcaceae	0.236	1643826: Eggerthellaceae	0.349	724: Haemophilus	0.271	709991: Odoribacter splanchnicus DSM 20712	0.238	1030843: Porphyromonas gingivalis TDC60	0.534	1980001: Cellulosimicrobium sp. TH-20	0.409	1721091: Chryseobacterium sp. IHB B 17019	0.335	572544: Ilyobacter polytropus DSM 2926	0.302	862962: Bacteroides fragilis 638R	0.253
662598: Neisseria meningitidis alpha14	0.219	630588: Neisseria meningitidis alpha710	0.194	28116: Bacteroides ovatus	0.195	351745: Shewanella sp. W3-18-1	0.269	526218: Sebaldella termitidis ATCC 33386	0.251	1257021: Flammeovirgaceae bacterium 311	0.199	194: Campylobacter	0.229	1300: Streptococcaceae	0.339	935897: Haemophilus influenzae F3047	0.265	649756: Anaerostipes hadrus	0.236	837: Porphyromonas gingivalis	0.515	306537: Corynebacterium jeikeium K411	0.382	926562: Owenweeksia hongkongensis DSM 17368	0.334	86661: Bacillus cereus group	0.29	1389489: Leifsonia xyli subsp. cynodontis DSM 46306	0.251
630588: Neisseria meningitidis alpha710	0.218	543: Enterobacteriaceae	0.193	39950: Dialister pneumosintes	0.189	1702221: Faecalibaculum rodentium	0.257	469: Acinetobacter	0.25	170187: Streptococcus pneumoniae TIGR4	0.198	469378: Cryptobacterium curtum DSM 15641	0.227	204441: Rhodospirillales	0.338	880073: Caldithrix abyssi DSM 13497	0.263	72407: Klebsiella pneumoniae subsp. pneumoniae	0.23	1403335: Porphyromonas gingivalis 381	0.502	1386: Bacillus	0.361	59732: Chryseobacterium	0.285	2: Bacteria	0.289	488222: Streptococcus pneumoniae JJA	0.249
935593: Neisseria meningitidis M04-240196	0.217	1386087: Neisseria meningitidis LNP21362	0.177	469: Acinetobacter	0.185	1906741: Jeongeupia sp. USM3	0.241	546271: Selenomonas sputigena ATCC 35185	0.245	335283: Nitrosomonas eutropha C91	0.193	399497: Tessaracoccus flavescens	0.212	1643824: Atopobiaceae	0.336	712633: Streptococcus sp. oral taxon 431	0.257	1834196: Lachnoclostridium sp. YL32	0.23	545694: Treponema primitia ZAS-2	0.492	33958: Lactobacillaceae	0.345	1763: Mycobacterium	0.281	1661: Trueperella pyogenes	0.275	642492: Clostridium lentocellum DSM 5427	0.237
29466: Veillonella parvula	-0.414	712961: Lactobacillus salivarius CECT 5713	-0.492	1200352: Corynebacterium terpenotabidum Y-11	-0.359	299768: Streptococcus thermophilus CNRZ1066	-0.419	1192197: Pelosinus fermentans JBW45	-0.295	407035: Salinicoccus halodurans	-0.37	272556: Aggregatibacter actinomycetemcomitans HK1651	-0.486	281090: Leifsonia xyli subsp. xyli str. CTCB07	-0.307	69541: Desulfuromonadales	-0.431	1662285: Methylophilus sp. TWE2	-0.333	679937: Bacteroides coprosuis DSM 18011	-0.255	837: Porphyromonas gingivalis	-0.28	72407: Klebsiella pneumoniae subsp. pneumoniae	-0.336	712122: Actinomyces sp. oral taxon 414	-0.328	272564: Desulfitobacterium hafniense DCB-2	-0.332
862966: Streptococcus intermedius C270	-0.418	1279: Staphylococcus	-0.494	545694: Treponema primitia ZAS-2	-0.366	1435972: Streptococcus thermophilus TH985	-0.43	446465: Brachybacterium faecium DSM 4810	-0.296	830: Butyrivibrio	-0.395	1300914: Mucilaginibacter sp. PAMC 26640	-0.488	1283: Staphylococcus haemolyticus	-0.307	1805478: Olsenella sp. Marseille-P2300	-0.45	1839799: Streptococcus sp. FDAARGOS_192	-0.333	1436725: Streptococcus thermophilus TH1477	-0.266	1389489: Leifsonia xyli subsp. cynodontis DSM 46306	-0.294	487214: Streptococcus pneumoniae Hungary19A-6	-0.346	545694: Treponema primitia ZAS-2	-0.371	1150423: Bifidobacterium dentium JCM 1195 = DSM 20436	-0.335
830: Butyrivibrio	-0.497	185008: Butyrivibrio hungatei	-0.502	487214: Streptococcus pneumoniae Hungary19A-6	-0.37	365348: Pelosinus	-0.441	29466: Veillonella parvula	-0.306	145458: Rathayibacter toxicus	-0.398	490: Neisseria sicca	-0.496	869312: Streptococcus pneumoniae SPN033038	-0.309	1192197: Pelosinus fermentans JBW45	-0.468	388919: Streptococcus sanguinis SK36	-0.374	482: Neisseria	-0.283	242619: Porphyromonas gingivalis W83	-0.309	1912795: Actinomyces sp. VUL4_3	-0.347	1183438: Gloeobacter kilaueensis JS1	-0.38	864564: Parascardovia denticolens DSM 10105 = JCM 12538	-0.341
446465: Brachybacterium faecium DSM 4810	-0.499	145458: Rathayibacter toxicus	-0.53	762948: Rothia dentocariosa ATCC 17931	-0.387	1415776: Streptococcus thermophilus TH1435	-0.461	1375: Aerococcus	-0.315	1598: Lactobacillus reuteri	-0.41	935590: Neisseria meningitidis M0579	-0.514	521006: Neisseria gonorrhoeae NCCP11945	-0.314	521095: Atopobium parvulum DSM 20469	-0.472	1435974: Streptococcus thermophilus TH982	-0.415	1376: Aerococcus urinae	-0.289	583355: Coraliomargarita akajimensis DSM 45221	-0.326	1748: Acidipropionibacterium acidipropionici	-0.358	1901: Streptomyces clavuligerus	-0.384	191610: Corynebacterium atypicum	-0.343
145458: Rathayibacter toxicus	-0.514	830: Butyrivibrio	-0.555	544580: Actinomyces oris	-0.398	264199: Streptococcus thermophilus LMG 18311	-0.464	1424294: Geosporobacter ferrireducens	-0.331	1436725: Streptococcus thermophilus TH1477	-0.46	1375: Aerococcus	-0.6	818: Bacteroides thetaiotaomicron	-0.362	446465: Brachybacterium faecium DSM 4810	-0.529	1208320: Thalassolituus oleivorans R6-15	-0.547	306537: Corynebacterium jeikeium K411	-0.29	196162: Nocardioides sp. JS614	-0.346	365348: Pelosinus	-0.396	906968: Treponema brennaborense DSM 12168	-0.409	593907: Cellulomonas gilvus ATCC 13127	-0.364
sBP	R	dBP	R	PP	R	Pulse	R	Sleep	R	Taste test	R	Smell test	R	PD Duration (Yrs)	R	PD Medications	R	MDS I	R	MDS II	R	MDS III	R	NMS	R	BDI (Depression)	R	SCOPA	R	PDQUALIF	R
29385: Staphylococcus saprophyticus	0.369	451864: Dikarya	0.272	1400053: Bacteroidales bacterium CF	0.512	471856: Jonesia denitrificans DSM 20603	0.379	698970: Corynebacterium diphtheriae HC04	0.369	128944: Aerococcus urinaehominis	0.332	991789: [Clostridium] propionicum DSM 1682	0.251	172045: Elizabethkingia miricola	0.645	264731: Prevotella ruminicola 23	0.311	29466: Veillonella parvula	0.444	1200352: Corynebacterium terpenotabidum Y-11	0.498	28211: Alphaproteobacteria	0.391	976: Bacteroidetes	0.404	517: Bordetella	0.408	712710: Tannerella sp. oral taxon HOT-286	0.395	976: Bacteroidetes	0.32
1400053: Bacteroidales bacterium CF	0.35	1531429: Coriobacteriaceae bacterium 68-1-3	0.267	583355: Coraliomargarita akajimensis DSM 45221	0.472	1302: Streptococcus gordonii	0.342	869309: Streptococcus pneumoniae SPNA45	0.364	135614: Xanthomonadales	0.268	1721091: Chryseobacterium sp. IHB B 17019	0.227	526218: Sebaldella termitidis ATCC 33386	0.643	76123: Prevotella enoeca	0.275	171551: Porphyromonadaceae	0.411	712710: Tannerella sp. oral taxon HOT-286	0.449	1871021: Lachnoclostridium phocaeense	0.381	308865: Elizabethkingia	0.357	1736: Eubacterium limosum	0.406	545694: Treponema primitia ZAS-2	0.392	29466: Veillonella parvula	0.301
583355: Coraliomargarita akajimensis DSM 45221	0.316	1539298: Treponema sp. OMZ 838	0.267	817: Bacteroides fragilis	0.462	1825069: Streptococcus marmotae	0.334	1351: Enterococcus faecalis	0.361	420889: Lactococcus garvieae ATCC 49156	0.263	485916: Desulfotomaculum acetoxidans DSM 771	0.223	1408: Bacillus pumilus	0.618	186803: Lachnospiraceae	0.268	976: Bacteroidetes	0.387	171551: Porphyromonadaceae	0.433	1403335: Porphyromonas gingivalis 381	0.357	1211326: Spirosoma aerolatum	0.319	446471: Xylanimonas cellulosilytica DSM 15894	0.388	906968: Treponema brennaborense DSM 12168	0.362	208596: Carnobacterium sp. 17-4	0.291
817: Bacteroides fragilis	0.3	1364: Lactococcus piscium	0.25	281090: Leifsonia xyli subsp. xyli str. CTCB07	0.367	1437447: Streptococcus mutans UA159-FR	0.33	708126: Jeotgalibaca dankookensis	0.322	1639: Listeria monocytogenes	0.248	1338011: Elizabethkingia anophelis NUHP1	0.222	715: Actinobacillus pleuropneumoniae	0.566	1884263: Selenomonas sp. oral taxon 920	0.266	208596: Carnobacterium sp. 17-4	0.382	888727: Eubacterium sulci ATCC 35585	0.43	1690248: Arthrobacter sp. LS16	0.344	1227739: Hymenobacter swuensis DY53	0.315	1912795: Actinomyces sp. VUL4_3	0.382	487214: Streptococcus pneumoniae Hungary19A-6	0.36	313590: Dokdonia sp. MED134	0.279
1768: Mycobacterium kansasii	0.279	157: Treponema	0.249	1166018: Fibrella aestuarina BUZ 2	0.345	1423721: Lactobacillus amylophilus DSM 20533 = JCM 1125	0.329	186802: Clostridiales	0.322	1423721: Lactobacillus amylophilus DSM 20533 = JCM 1125	0.243	511995: Candidatus Azobacteroides pseudotrichonymphae genomovar. CFP2	0.221	85007: Corynebacteriales	0.544	908937: Prevotella dentalis DSM 3688	0.265	1759399: Streptococcus sp. A12	0.361	976: Bacteroidetes	0.395	1906741: Jeongeupia sp. USM3	0.343	1606016: Elizabethkingia endophytica	0.314	1469502: Burkholderiales bacterium GJ-E10	0.353	358681: Brevibacillus brevis NBRC 100599	0.356	1198232: Cycloclasticus zancles 78-ME	0.278
213810: Ruminococcus champanellensis 18P13 = JCM 17042	-0.282	281090: Leifsonia xyli subsp. xyli str. CTCB07	-0.259	1307442: Fusobacterium hwasookii ChDC F174	-0.23	33941: Geobacillus thermoleovorans	-0.243	1704044: Arthrobacter sp. ERGS1: 01	-0.333	869209: Treponema succinifaciens DSM 2489	-0.282	515619: [Eubacterium rectale] ATCC 33656	-0.309	1903186: Brachybacterium sp. P6-10-X1	-0.236	768507: Cytophagales	-0.476	1231072: Clostridium tetani 12124569	-0.349	1258574: Streptococcus gallolyticus subsp. gallolyticus DSM 16831	-0.351	1423721: Lactobacillus amylophilus DSM 20533 = JCM 1125	-0.314	862967: Streptococcus intermedius B196	-0.361	1811193: Streptococcus pantholopis	-0.311	284811: Eremothecium gossypii ATCC 10895	-0.289	1630693: Gemmata sp. SH-PL17	-0.324
238: Elizabethkingia meningoseptica	-0.302	172045: Elizabethkingia miricola	-0.264	1307443: Fusobacterium hwasookii ChDC F206	-0.239	1716: Corynebacterium	-0.249	1805478: Olsenella sp. Marseille-P2300	-0.338	511435: Candidatus Azobacteroides pseudotrichonymphae	-0.311	1796616: Blautia sp. YL58	-0.311	446469: Sanguibacter keddieii DSM 10542	-0.239	716546: leotiomyceta	-0.496	39950: Dialister pneumosintes	-0.361	552526: Streptococcus equi subsp. zooepidemicus MGCS10565	-0.366	297352: Lactococcus piscium MKFS47	-0.317	1072256: Corynebacterium uterequi	-0.362	1353243: Streptococcus anginosus subsp. whileyi MAS624	-0.315	1584: Lactobacillus delbrueckii	-0.291	1883: Streptomyces	-0.326
156978: Corynebacterium imitans	-0.303	1433126: Mucinivorans hirudinis	-0.267	1286171: Peptoclostridium acidaminophilum DSM 3953	-0.242	306537: Corynebacterium jeikeium K411	-0.285	906968: Treponema brennaborense DSM 12168	-0.35	45667: Halobacillus	-0.331	1376: Aerococcus urinae	-0.313	22: Shewanella	-0.249	1231072: Clostridium tetani 12124569	-0.499	1814128: Streptococcus halotolerans	-0.368	862967: Streptococcus intermedius B196	-0.367	515620: [Eubacterium] eligens ATCC 27750	-0.319	706587: Desulfomonile tiedjei DSM 6799	-0.364	1814128: Streptococcus halotolerans	-0.319	1814128: Streptococcus halotolerans	-0.306	1117: Cyanobacteria	-0.341
1401325: Ornithobacterium rhinotracheale ORT-UMN 88	-0.31	698762: Thermanaeromonas toyohensis ToBE	-0.275	199: Campylobacter concisus	-0.261	388357: Kocuria turfanensis	-0.298	545694: Treponema primitia ZAS-2	-0.367	246787: Bacteroides cellulosilyticus	-0.344	1506553: Lachnoclostridium	-0.321	237: Flavobacterium	-0.275	1811193: Streptococcus pantholopis	-0.522	671232: Streptococcus anginosus group	-0.371	184250: Streptococcus constellatus subsp. pharyngis	-0.378	552526: Streptococcus equi subsp. zooepidemicus MGCS10565	-0.346	671232: Streptococcus anginosus group	-0.392	862967: Streptococcus intermedius B196	-0.322	1231072: Clostridium tetani 12124569	-0.32	357809: Lachnoclostridium phytofermentans ISDg	-0.351
199: Campylobacter concisus	-0.312	156978: Corynebacterium imitans	-0.29	595494: Tolumonas auensis DSM 9187	-0.262	1196094: Snodgrassella alvi wkB2	-0.326	521095: Atopobium parvulum DSM 20469	-0.392	1642647: Proteiniphilum saccharofermentans	-0.377	1436725: Streptococcus thermophilus TH1477	-0.337	1231072: Clostridium tetani 12124569	-0.317	869309: Streptococcus pneumoniae SPNA45	-0.528	862967: Streptococcus intermedius B196	-0.392	862968: Streptococcus constellatus subsp. pharyngis C818	-0.433	1612551: Actinoalloteichus sp. GBA129-24	-0.404	1814128: Streptococcus halotolerans	-0.42	1502: Clostridium perfringens	-0.342	39950: Dialister pneumosintes	-0.334	1346: Streptococcus iniae	-0.418
5 largest Pos/Neg correlations shown for each variable
